# Supplementary material for: CLL Cells Respond to B-Cell Receptor Stimulation with a MicroRNA/mRNA Signature Associated with MYC Activation and Cell Cycle Progression
Source: PubMed Central journal article supplement (PMC3613353; doi:10.1371/journal.pone.0060275), 2013-04-01
Supplement: pone.0060275.s008.pdf [file pone.0060275.s008.pdf]

**Table S1**

| Patient ID | miRNA array qPCR | miRNA single qPCR | mRNA array | qPCR | Kinetic expression miRNA/mRNA qPCR | Cryo/Fresh | Percentage Lymphocytes | Percentage CD19/CD5 before selection (% from lymphocytes) | Percentage CD19 after selection (mean 3h and 24h for both A and M) |
|------------|------------------|-------------------|------------|------|------------------------------------|------------|------------------------|-----------------------------------------------------------|--------------------------------------------------------------------|
| CLL-1      |                  | ■                 |            | ■    |                                    | Cryo       | 85                     | 81                                                        | 99,3                                                               |
| CLL-2      | ■                | ■                 | ■          | ■    |                                    | Cryo       | 92                     | 92                                                        | 99,5                                                               |
| CLL-3      | ■                | ■                 | ■          | ■    |                                    | Cryo       | 89                     | 96                                                        | 99,0                                                               |
| CLL-4      |                  | ■                 |            | ■    |                                    | Cryo       | 90                     | 99                                                        | 99,2                                                               |
| CLL-5      |                  | ■                 |            | ■    |                                    | Fresh      | 63                     | 82                                                        | 99,1                                                               |
| CLL-6      | ■                | ■                 |            | ■    |                                    | Fresh      | 76                     | 88                                                        | 99,4                                                               |
| CLL-7      | ■                | ■                 |            | ■    |                                    | Fresh      | 73                     | 62                                                        | 99,2                                                               |
| CLL-8      | ■                | ■                 | ■          | ■    |                                    | Cryo       | 46                     | 36                                                        | 98,2                                                               |
| CLL-9      | ■                | ■                 | ■          | ■    |                                    | Fresh      | 76                     | 94                                                        | 98,7                                                               |
| CLL-10     | ■                | ■                 |            | ■    |                                    | Fresh      | 83                     | 93                                                        | 98,5                                                               |
| CLL-11     | ■                | ■                 |            | ■    |                                    | Fresh      | 71                     | 98                                                        | 98,3                                                               |
| CLL-12     | ■                | ■                 | ■          | ■    |                                    | Cryo       | 98                     | ND                                                        | 98,6                                                               |
| CLL-13     |                  | ■                 |            | ■    |                                    | Cryo       | 77                     | 87                                                        | 98,2                                                               |
| CLL-14     |                  |                   |            | ■    | ■                                  | Cryo       | 86                     | 90                                                        | ND                                                                 |
| CLL-15     |                  |                   |            | ■    | ■                                  | Cryo       | 69                     | 96                                                        | ND                                                                 |
| CLL-16     |                  |                   |            | ■    | ■                                  | Cryo       | 75                     | 93                                                        | ND                                                                 |
| CLL-17     |                  |                   |            | ■    | ■                                  | Cryo       | 88                     | 97                                                        | ND                                                                 |
| CLL-18     |                  |                   |            | ■    | ■                                  | Cryo       | 96                     | 94                                                        | ND                                                                 |
| CLL-19     |                  |                   |            | ■    | ■                                  | Cryo       | 97                     | 99                                                        | ND                                                                 |
| CLL-20     |                  |                   |            | ■    | ■                                  | Cryo       | 76                     | 94                                                        | ND                                                                 |
| CLL-21     |                  |                   |            | ■    | ■                                  | Cryo       | 91                     | 97                                                        | ND                                                                 |

Use of samples, according to patient identity (ID). miRNA array qPCR: genome wide combined PCR array using pooled primers in reverse transcription; miRNA single PCR: qPCR using specific reverse transcription primer, mRNA array: genome wide Illumina mRNA array, qPCR: real-time PCR for genes as indicated in text and Fig. 1 and Fig. S1, Kinetic expression miRNA/mRNA qPCR:

real-time PCR for mRNA of genes shown in Fig. 1A and for miRNA shown in Fig. 6. Fresh/Cryo: indicates whether cells were used fresh upon blood sampling or after cryopreservation of mononuclear fraction, Percentage of lymphocytes: in mononuclear fraction in flow cytometry, Percentage of CD19/CD5 before selection: percentage of double positive CD19+CD5+ cells in of lymphocytes in mononuclear fraction, Percentage CD19+ after selection: percentage of CD19+ cells after enrichment from lymphocytes in mononuclear fraction.
