# Supplementary material for: CLL Cells Respond to B-Cell Receptor Stimulation with a MicroRNA/mRNA Signature Associated with MYC Activation and Cell Cycle Progression
Source: PubMed Central journal article supplement (PMC3613353; doi:10.1371/journal.pone.0060275), 2013-04-01
Supplement: pone.0060275.s009.pdf [file pone.0060275.s009.pdf]

**Table S2: Patient Characteristics**

| Patient ID | Sex | Age at diagnosis | Cytogenetic analysis                                                 | CLL score | RAI | BINET | VH Usage | Percentage Mutations | Mutation status | ZAP70 |
|------------|-----|------------------|----------------------------------------------------------------------|-----------|-----|-------|----------|----------------------|-----------------|-------|
| CLL-1      | M   | 52               | 11qdel <sup>2</sup>                                                  | 5         | 0   | A     | 3-30     | 95,7                 | Mut             | N     |
| CLL-2      | M   | 59               | 13q14 del <sup>1</sup>                                               | 4         | 0   | A     | 3-30     | 90,1                 | Mut             | N     |
| CLL-3      | M   | 57               | No del <sup>1</sup>                                                  | 5         | 0   | A     | 3-23     | 91,1                 | Mut             | N     |
| CLL-4      | F   | 61               | 17p del <sup>2</sup>                                                 | 5         | 0   | A     | 3-21     | 93,9                 | Mut             | N     |
| CLL-5      | M   | 58               | 13q14del <sup>1</sup> ,<br>Other <sup>3</sup>                        | 5         | 1   | A     | 4-31     | 96,6                 | Mut             | N     |
| CLL-6      | F   | 46               | 13q14 del <sup>1</sup>                                               | 5         | 2   | B     | 1-08     | 93,7                 | Mut             | N     |
| CLL-7      | F   | 34               | 13q14 del <sup>1</sup>                                               | 5         | 0   | A     | 2-70     | 95,7                 | Mut             | N     |
| CLL-8      | M   | 49               | 13q14 del <sup>1</sup>                                               | 5         | 0   | A     | 2-70     | 99                   | Unmut           | N     |
| CLL-9      | F   | 43               | tris 12 <sup>1</sup>                                                 | 4         | 0   | A     | 1-03     | 98,2                 | Unmut           | P     |
| CLL-10     | F   | 57               | 13q14 del <sup>1</sup>                                               | 4         | 0   | A     | 2-70     | 100                  | Unmut           | P     |
| CLL-11     | M   | 46               | 13q14del <sup>1</sup><br>11q14del <sup>1</sup><br>Other <sup>4</sup> | 5         | 0   | A     | 5-01     | 99,5                 | Unmut           | P     |
| CLL-12     | F   | 73               | No del <sup>1</sup>                                                  | 3         | 0   | A     | 3-30     | 100                  | Unmut           | P     |
| CLL-13     | F   | 72               | 13q del <sup>2</sup>                                                 | 5         | 0   | A     | 3-33     | 100                  | Unmut           | P     |
| CLL-14     | F   | 64               | Other <sup>2,5</sup>                                                 | 5         | 2   | A     | 3-13     | 95                   | Mut             | N     |
| CLL-15     | M   | 52               | 13q del <sup>2</sup>                                                 | 5         | 1   | A     | 3-07     | 96,2                 | Mut             | N     |
| CLL-16     | M   | 50               | Other <sup>2,6</sup>                                                 | 5         | 0   | A     | 4-34     | 91,4                 | Mut             | N     |
| CLL-17     | F   | 45               | Inv 11 <sup>2</sup>                                                  | 5         | 2   | A     | 4-39     | 90,3                 | Mut             | N     |
| CLL-18     | M   | 71               | 13q del <sup>2</sup>                                                 | 4         | 0   | A     | 1-69     | 100                  | Unmut           | P     |
| CLL-19     | M   | 64               | No del <sup>2</sup>                                                  | 5         | 0   | A     | 4-39     | 100                  | Unmut           | P     |
| CLL-20     | F   | 74               | 17p del <sup>2</sup>                                                 | 5         | 0   | A     | 3-23     | 100                  | Unmut           | P     |
| CLL-21     | M   | 52               | No del <sup>2</sup>                                                  | 5         | 0   | A     | 1-18     | 98,6                 | Unmut           | P     |

<sup>1</sup> CGH, <sup>2</sup> FISH, <sup>3</sup> loss 3p21, loss 8p23, loss 10q24,

<sup>4</sup> loss 2p25, <sup>5</sup> loss in chromosome 2,6 and 13, <sup>6</sup> loss in chromosome XY.

Flow cytometry scoring according to Matutes et al.; classical staging systems according to Rai et al. and Binet et al. (reviewed in [2]), M: male, F: female, Mut: mutated, Unmut: Unmutated, N: negative, P: positive
