# Supplementary material for: CLL Cells Respond to B-Cell Receptor Stimulation with a MicroRNA/mRNA Signature Associated with MYC Activation and Cell Cycle Progression
Source: PubMed Central journal article supplement (PMC3613353; doi:10.1371/journal.pone.0060275), 2013-04-01
Supplement: pone.0060275.s010.pdf [file pone.0060275.s010.pdf]

**RP analysis 3h**

|           | <b>Upregulated</b> |          |                    |     |         |
|-----------|--------------------|----------|--------------------|-----|---------|
|           | gene.index         | RP/Rsum  | FC:(class1/class2) | pfp | P.value |
| CCL3L1    | 4781               | 47,7908  | 6,4876             | 0   | 0       |
| CCL4L2    | 4787               | 42,124   | 6,0398             | 0   | 0       |
| DUSP2     | 7876               | 35,8667  | 6,0191             | 0   | 0       |
| CCL3L1    | 4782               | 60,9642  | 5,8548             | 0   | 0       |
| FOS       | 10102              | 66,2687  | 5,4153             | 0   | 0       |
| CKS2      | 5638               | 51,0605  | 5,3398             | 0   | 0       |
| CCL3      | 4780               | 55,9837  | 5,2664             | 0   | 0       |
| UBTD1     | 46765              | 63,6582  | 5,2107             | 0   | 0       |
| CCL4L1    | 4786               | 96,5929  | 5,0737             | 0   | 0       |
| MYC       | 35990              | 62,9665  | 4,8165             | 0   | 0       |
| NR4A3     | 36926              | 85,9131  | 4,7764             | 0   | 0       |
| C13ORF15  | 2870               | 84,503   | 4,6399             | 0   | 0       |
| FOSB      | 10103              | 95,8992  | 4,6133             | 0   | 0       |
| PHLDB1    | 38811              | 75,0616  | 4,6028             | 0   | 0       |
| EGR1      | 8140               | 103,1297 | 4,5835             | 0   | 0       |
| CKS2      | 5637               | 78,1984  | 4,5473             | 0   | 0       |
| MGC4677   | 35242              | 97,3535  | 4,4889             | 0   | 0       |
| NR4A2     | 36921              | 77,1915  | 4,4584             | 0   | 0       |
| CCL3L3    | 4784               | 110,2168 | 4,3239             | 0   | 0       |
| RCAN1     | 40906              | 96,0508  | 4,202              | 0   | 0       |
| SERPINE2  | 42408              | 151,8815 | 4,0174             | 0   | 0       |
| CHRNA1    | 5545               | 143,8532 | 3,9466             | 0   | 0       |
| HOMER1    | 12151              | 107,4119 | 3,9331             | 0   | 0       |
| TRIB3     | 46044              | 100,7997 | 3,9274             | 0   | 0       |
| EGR2      | 8141               | 129,175  | 3,9216             | 0   | 0       |
| MYCN      | 35997              | 146,9304 | 3,9042             | 0   | 0       |
| TRK1      | 46182              | 110,3637 | 3,8664             | 0   | 0       |
| EGR3      | 8142               | 131,1695 | 3,8342             | 0   | 0       |
| LOC143666 | 27442              | 125,2329 | 3,8105             | 0   | 0       |
| HS.562534 | 21117              | 162,4065 | 3,7078             | 0   | 0       |
| DDIT4     | 7028               | 137,3448 | 3,5875             | 0   | 0       |
| RNF19A    | 41367              | 183,1988 | 3,5352             | 0   | 0       |
| SERTAD1   | 42417              | 149,2325 | 3,5143             | 0   | 0       |
| PTGER4    | 40198              | 151,274  | 3,5125             | 0   | 0       |
| LOC653506 | 33238              | 230,2074 | 3,4946             | 0   | 0       |
| PIM3      | 38925              | 161,2095 | 3,4892             | 0   | 0       |
| MYC       | 35989              | 190,974  | 3,4492             | 0   | 0       |
| TRQ1      | 46243              | 164,3288 | 3,447              | 0   | 0       |
| CHRNA1    | 5544               | 201,3756 | 3,4158             | 0   | 0       |
| HS.538259 | 17211              | 181,9894 | 3,4149             | 0   | 0       |
| GRAMD4    | 11314              | 163,7056 | 3,3937             | 0   | 0       |
| HS.543887 | 18873              | 217,4331 | 3,3781             | 0   | 0       |
| RNF19A    | 41365              | 169,8218 | 3,3642             | 0   | 0       |
| ATF3      | 1771               | 172,5779 | 3,3265             | 0   | 0       |
| KLF10     | 26575              | 229,6837 | 3,2556             | 0   | 0       |

|           |       |          |        |          |   |
|-----------|-------|----------|--------|----------|---|
| RHOB      | 41182 | 182,4627 | 3,2474 | 0        | 0 |
| BTG3      | 2585  | 190,2639 | 3,2267 | 0        | 0 |
| C17ORF91  | 3149  | 193,3062 | 3,2248 | 0        | 0 |
| MAPK6     | 34704 | 205,9858 | 3,2185 | 0        | 0 |
| C10ORF54  | 2695  | 233,5395 | 3,1841 | 0        | 0 |
| PDCD1     | 38417 | 214,6011 | 3,1656 | 0        | 0 |
| CD200     | 4921  | 264,527  | 3,1319 | 0        | 0 |
| EIF2AK3   | 8175  | 216,6832 | 3,0709 | 0        | 0 |
| NR4A2     | 36922 | 254,6787 | 2,9884 | 0        | 0 |
| SRXN1     | 44089 | 216,467  | 2,983  | 0        | 0 |
| SLAMF7    | 42774 | 260,4772 | 2,963  | 0        | 0 |
| PRNP      | 39895 | 269,3788 | 2,9584 | 0        | 0 |
| SPAG9     | 43804 | 223,8219 | 2,9582 | 0        | 0 |
| BLVRB     | 2388  | 277,3582 | 2,9332 | 0        | 0 |
| ZNF593    | 48501 | 254,3103 | 2,896  | 0        | 0 |
| C5ORF30   | 3843  | 266,4126 | 2,8888 | 0        | 0 |
| BTG3      | 2586  | 277,4659 | 2,8657 | 0        | 0 |
| TMEM88    | 45644 | 279,3586 | 2,8301 | 0        | 0 |
| RAB20     | 40468 | 309,7474 | 2,8166 | 0        | 0 |
| HS.374278 | 15286 | 277,8714 | 2,8071 | 0        | 0 |
| IDI1      | 25188 | 272,252  | 2,7953 | 0        | 0 |
| TNFRSF12A | 45736 | 267,781  | 2,7801 | 0        | 0 |
| MAP2K3    | 34621 | 275,3458 | 2,7652 | 0        | 0 |
| RCAN1     | 40904 | 283,0264 | 2,7595 | 0        | 0 |
| UGCG      | 46814 | 285,1352 | 2,7493 | 0        | 0 |
| LOC650832 | 32232 | 307,7838 | 2,6688 | 0        | 0 |
| METRNL    | 35053 | 355,2928 | 2,9115 | 1,00E-04 | 0 |
| IL2RB     | 25481 | 336,9612 | 2,7958 | 1,00E-04 | 0 |
| WSB2      | 47590 | 329,1297 | 2,7839 | 1,00E-04 | 0 |
| LOC653158 | 33046 | 345,3456 | 2,7302 | 1,00E-04 | 0 |
| PHACTR1   | 38731 | 349,3032 | 2,7279 | 1,00E-04 | 0 |
| AXUD1     | 2042  | 353,0192 | 2,7202 | 1,00E-04 | 0 |
| HSPC111   | 25037 | 335,2318 | 2,7018 | 1,00E-04 | 0 |
| RRAD      | 41702 | 353,7857 | 2,6777 | 1,00E-04 | 0 |
| DDIT3     | 7027  | 314,6501 | 2,6614 | 1,00E-04 | 0 |
| C19ORF48  | 3222  | 348,54   | 2,5822 | 1,00E-04 | 0 |
| PRRX2     | 39986 | 353,0423 | 2,5727 | 1,00E-04 | 0 |
| LPL       | 34121 | 393,802  | 2,8553 | 2,00E-04 | 0 |
| GLA       | 10846 | 391,1439 | 2,6606 | 2,00E-04 | 0 |
| TUBB2A    | 46514 | 367,8022 | 2,505  | 2,00E-04 | 0 |
| LRRC32    | 34202 | 410,4958 | 2,7919 | 3,00E-04 | 0 |
| GEM       | 10703 | 408,9129 | 2,6964 | 3,00E-04 | 0 |
| CCL3L1    | 4783  | 442,8549 | 2,6823 | 3,00E-04 | 0 |
| RGS1      | 41117 | 414,6836 | 2,6152 | 3,00E-04 | 0 |
| METTL1    | 35060 | 419,9896 | 2,5915 | 3,00E-04 | 0 |
| GEM       | 10702 | 449,5579 | 2,5377 | 3,00E-04 | 0 |
| PGM2      | 38710 | 427,4431 | 2,5184 | 3,00E-04 | 0 |

|           |       |          |        |          |   |
|-----------|-------|----------|--------|----------|---|
| GNA13     | 10954 | 428,5191 | 2,5162 | 3,00E-04 | 0 |
| FAM57A    | 8992  | 426,7773 | 2,5123 | 3,00E-04 | 0 |
| SLC7A5    | 43262 | 446,3838 | 2,4983 | 3,00E-04 | 0 |
| PNO1      | 39289 | 406,9919 | 2,4739 | 3,00E-04 | 0 |
| SPAG9     | 43805 | 437,6639 | 2,4711 | 3,00E-04 | 0 |
| C19ORF48  | 3223  | 421,879  | 2,4667 | 3,00E-04 | 0 |
| NEU1      | 36454 | 445,3121 | 2,4659 | 3,00E-04 | 0 |
| RIOK1     | 41233 | 410,3403 | 2,4559 | 3,00E-04 | 0 |
| CORO6     | 6110  | 449,5004 | 2,4465 | 3,00E-04 | 0 |
| C6ORF114  | 3875  | 424,1795 | 2,4362 | 3,00E-04 | 0 |
| PCGF5     | 38354 | 456,1099 | 2,4338 | 3,00E-04 | 0 |
| RRAGD     | 41709 | 420,4736 | 2,401  | 3,00E-04 | 0 |
| HS.545232 | 19350 | 433,391  | 2,388  | 3,00E-04 | 0 |
| ALG13     | 865   | 453,1642 | 2,372  | 3,00E-04 | 0 |
| SGK       | 42540 | 478,1018 | 2,6459 | 4,00E-04 | 0 |
| SPRY2     | 43987 | 469,2504 | 2,6156 | 4,00E-04 | 0 |
| PIF1      | 38857 | 484,849  | 2,5213 | 4,00E-04 | 0 |
| DUSP5     | 7890  | 487,9102 | 2,5146 | 4,00E-04 | 0 |
| HIF1A     | 11875 | 495,0234 | 2,4625 | 4,00E-04 | 0 |
| HS.25892  | 14514 | 475,6012 | 2,4411 | 4,00E-04 | 0 |
| PRNP      | 39894 | 477,5034 | 2,441  | 4,00E-04 | 0 |
| TRAF1     | 45973 | 484,1493 | 2,4161 | 4,00E-04 | 0 |
| IL21R     | 25451 | 458,6684 | 2,4035 | 4,00E-04 | 0 |
| MTHFD2    | 35846 | 463,7514 | 2,4015 | 4,00E-04 | 0 |
| BXDC1     | 2623  | 510,6286 | 2,3616 | 4,00E-04 | 0 |
| NHEDC2    | 36557 | 472,7455 | 2,3279 | 4,00E-04 | 0 |
| CYCSL1    | 6745  | 489,5476 | 2,3206 | 4,00E-04 | 0 |
| LONRF3    | 34083 | 491,4441 | 2,2853 | 4,00E-04 | 0 |
| LOC643930 | 29906 | 535,1978 | 2,619  | 5,00E-04 | 0 |
| FAM152B   | 8873  | 556,6933 | 2,4663 | 5,00E-04 | 0 |
| RPS24     | 41637 | 533,3591 | 2,409  | 5,00E-04 | 0 |
| HMGCS1    | 12078 | 544,866  | 2,4083 | 5,00E-04 | 0 |
| ELL2      | 8275  | 537,2268 | 2,3854 | 5,00E-04 | 0 |
| RRP15     | 41727 | 473,0599 | 2,3765 | 5,00E-04 | 0 |
| MRPS17    | 35695 | 534,6665 | 2,3427 | 5,00E-04 | 0 |
| RCN1      | 40922 | 557,594  | 2,3406 | 5,00E-04 | 0 |
| YRDC      | 47736 | 529,1861 | 2,2627 | 5,00E-04 | 0 |
| NAMPT     | 36156 | 583,6362 | 2,3957 | 7,00E-04 | 0 |
| TNFRSF18  | 45742 | 566,5102 | 2,3428 | 7,00E-04 | 0 |
| GADD45A   | 10460 | 583,6088 | 2,2733 | 7,00E-04 | 0 |
| LOC731049 | 33952 | 576,6703 | 2,2198 | 7,00E-04 | 0 |
| MCOLN3    | 34914 | 564,0996 | 2,1761 | 7,00E-04 | 0 |
| NFKBID    | 36522 | 594,8423 | 2,3283 | 8,00E-04 | 0 |
| PPAT      | 39490 | 589,3133 | 2,266  | 8,00E-04 | 0 |
| POLB      | 39329 | 596,4428 | 2,4139 | 9,00E-04 | 0 |
| NR4A3     | 36924 | 597,45   | 2,3199 | 9,00E-04 | 0 |
| PAK1IP1   | 38037 | 598,098  | 2,2929 | 9,00E-04 | 0 |

|           |       |          |        |          |   |
|-----------|-------|----------|--------|----------|---|
| DUSP4     | 7889  | 595,3225 | 2,29   | 9,00E-04 | 0 |
| TSC22D2   | 46262 | 595,7596 | 2,2867 | 9,00E-04 | 0 |
| HES4      | 11820 | 612,1661 | 2,3844 | 0,001    | 0 |
| PVT1      | 40375 | 615,0481 | 2,1902 | 0,001    | 0 |
| FLJ43663  | 9913  | 614,9987 | 2,154  | 0,001    | 0 |
| RHEB      | 41178 | 609,6659 | 2,1428 | 0,001    | 0 |
| HEG1      | 11782 | 650,6894 | 2,2985 | 0,0011   | 0 |
| VGF       | 47183 | 630,2373 | 2,2793 | 0,0011   | 0 |
| KBTBD8    | 25926 | 627,511  | 2,2309 | 0,0011   | 0 |
| NOLC1     | 36760 | 635,7436 | 2,2159 | 0,0011   | 0 |
| GADD45A   | 10459 | 644,1916 | 2,1952 | 0,0011   | 0 |
| KIAA0133  | 26171 | 621,1558 | 2,1768 | 0,0011   | 0 |
| TNFSF9    | 45780 | 639,5007 | 2,167  | 0,0011   | 0 |
| NIP7      | 36589 | 639,4609 | 2,1607 | 0,0011   | 0 |
| HS.544512 | 19112 | 649,2663 | 2,1459 | 0,0011   | 0 |
| OAS1      | 37196 | 681,3673 | 2,2069 | 0,0012   | 0 |
| BYSL      | 2627  | 668,0089 | 2,1582 | 0,0012   | 0 |
| LOC651816 | 32494 | 659,2492 | 2,1563 | 0,0012   | 0 |
| SNX8      | 43654 | 664,9349 | 2,1463 | 0,0012   | 0 |
| NETO2     | 36453 | 689,5192 | 2,1368 | 0,0012   | 0 |
| HS.156550 | 13522 | 665,6128 | 2,1342 | 0,0012   | 0 |
| ETF1      | 8563  | 687,5429 | 2,0862 | 0,0012   | 0 |
| ZNF643    | 48551 | 667,3656 | 2,068  | 0,0012   | 0 |
| C16ORF61  | 3064  | 674,236  | 2,0679 | 0,0012   | 0 |
| FILIP1L   | 9495  | 665,9757 | 1,9743 | 0,0012   | 0 |
| ADM       | 542   | 720,8753 | 2,3995 | 0,0013   | 0 |
| HS.575551 | 23301 | 698,9888 | 2,1993 | 0,0013   | 0 |
| MRTO4     | 35728 | 697,053  | 2,1249 | 0,0013   | 0 |
| DPH3      | 7704  | 714,0497 | 2,0968 | 0,0013   | 0 |
| TNFRSF9   | 45759 | 710,3174 | 2,2602 | 0,0014   | 0 |
| GZMB      | 11600 | 708,5133 | 2,2301 | 0,0014   | 0 |
| TNFRSF18  | 45741 | 710,4978 | 2,1945 | 0,0014   | 0 |
| PRKCH     | 39843 | 702,4412 | 2,1874 | 0,0014   | 0 |
| C5ORF32   | 3844  | 702,8054 | 2,1851 | 0,0014   | 0 |
| LYAR      | 34378 | 712,2923 | 2,1559 | 0,0014   | 0 |
| ZSWIM6    | 48778 | 700,4108 | 2,1315 | 0,0014   | 0 |
| DCUN1D5   | 7003  | 742,397  | 2,1262 | 0,0014   | 0 |
| GFOD1     | 10721 | 706,3565 | 2,1259 | 0,0014   | 0 |
| DNAJB5    | 7574  | 742,6149 | 2,1157 | 0,0014   | 0 |
| PDGFA     | 38496 | 737,2299 | 2,1093 | 0,0014   | 0 |
| NFATC1    | 36482 | 742,8741 | 2,1042 | 0,0014   | 0 |
| SNRPD1    | 43585 | 743,8311 | 2,0681 | 0,0014   | 0 |
| EIF2C2    | 8184  | 709,9451 | 2,0488 | 0,0014   | 0 |
| LY9       | 34373 | 708,1669 | 2,0404 | 0,0014   | 0 |
| SLC3A2    | 43150 | 734,7122 | 2,0252 | 0,0014   | 0 |
| FILIP1L   | 9493  | 704,0363 | 1,9285 | 0,0014   | 0 |
| C13ORF25  | 2877  | 752,268  | 2,0921 | 0,0015   | 0 |

|           |       |          |        |        |   |
|-----------|-------|----------|--------|--------|---|
| CENPN     | 5305  | 751,3543 | 2,0274 | 0,0015 | 0 |
| FILIP1L   | 9494  | 749,3096 | 1,8783 | 0,0015 | 0 |
| EVI2A     | 8594  | 764,5378 | 2,2335 | 0,0016 | 0 |
| ICOS      | 25168 | 762,7778 | 2,1776 | 0,0016 | 0 |
| RPS7      | 41690 | 773,1229 | 2,1566 | 0,0016 | 0 |
| ZNF165    | 48078 | 776,7627 | 2,1424 | 0,0016 | 0 |
| JUNB      | 25889 | 773,615  | 2,1104 | 0,0016 | 0 |
| ITK       | 25804 | 762,5387 | 2,1068 | 0,0016 | 0 |
| DCUN1D5   | 7002  | 765,9284 | 2,1058 | 0,0016 | 0 |
| SLAMF1    | 42771 | 774,7741 | 2,0756 | 0,0016 | 0 |
| SEH1L     | 42236 | 763,9509 | 2,0356 | 0,0016 | 0 |
| HS.537591 | 17015 | 768,897  | 2,0118 | 0,0016 | 0 |
| HS.562219 | 21058 | 782,6012 | 2,1326 | 0,0018 | 0 |
| DPH3      | 7705  | 781,0048 | 2,0764 | 0,0018 | 0 |
| IER2      | 25194 | 782,4036 | 2,0074 | 0,0018 | 0 |
| SLCO4A1   | 43314 | 801,7001 | 2,1272 | 0,0019 | 0 |
| AMD1      | 945   | 801,9425 | 2,1063 | 0,0019 | 0 |
| KLF10     | 26577 | 815,2073 | 2,0714 | 0,0019 | 0 |
| STX3      | 44373 | 804,4499 | 2,051  | 0,0019 | 0 |
| BXDC2     | 2624  | 800,6134 | 2,0488 | 0,0019 | 0 |
| ING1      | 25564 | 815,5917 | 2,0441 | 0,0019 | 0 |
| RBBP8     | 40784 | 791,8505 | 2,0397 | 0,0019 | 0 |
| PPP1R2    | 39597 | 794,5871 | 2,032  | 0,0019 | 0 |
| MAT2A     | 34793 | 794,3492 | 2,0198 | 0,0019 | 0 |
| ETF1      | 8564  | 814,0066 | 2,0194 | 0,0019 | 0 |
| DUSP4     | 7888  | 809,8637 | 1,961  | 0,0019 | 0 |
| LOC143543 | 27441 | 807,4122 | 1,947  | 0,0019 | 0 |
| SIAH2     | 42677 | 809,7902 | 2,0789 | 0,002  | 0 |
| HIC1      | 11873 | 819,0892 | 2,1404 | 0,0021 | 0 |
| DIMT1L    | 7347  | 819,9778 | 2,0844 | 0,0021 | 0 |
| DNAJB5    | 7576  | 821,1844 | 2,0358 | 0,0021 | 0 |
| RPS7      | 41691 | 824,0924 | 2,0897 | 0,0022 | 0 |
| ADO       | 547   | 825,1343 | 2,0481 | 0,0022 | 0 |
| ALG13     | 864   | 829,7362 | 1,9925 | 0,0022 | 0 |
| C6ORF66   | 3973  | 825,4165 | 1,9751 | 0,0022 | 0 |
| CD84      | 5020  | 835,4308 | 2,0887 | 0,0023 | 0 |
| MAFF      | 34469 | 837,6262 | 2,0424 | 0,0023 | 0 |
| TMEM185B  | 45529 | 833,3655 | 2,027  | 0,0023 | 0 |
| MYCN      | 35998 | 843,3043 | 2,0223 | 0,0023 | 0 |
| CA2       | 4211  | 835,3859 | 2,0221 | 0,0023 | 0 |
| NAMPT     | 36157 | 836,4351 | 2,0186 | 0,0023 | 0 |
| HS.543241 | 18613 | 837,6126 | 2,0105 | 0,0023 | 0 |
| BCL2      | 2250  | 839,2906 | 2,009  | 0,0023 | 0 |
| PTS       | 40335 | 835,144  | 1,9518 | 0,0023 | 0 |
| NAB2      | 36131 | 842,3436 | 1,9447 | 0,0023 | 0 |
| METRNL    | 35051 | 861,3809 | 2,176  | 0,0024 | 0 |
| ZFP36L1   | 47937 | 848,0768 | 2,103  | 0,0024 | 0 |

|           |       |          |        |        |   |
|-----------|-------|----------|--------|--------|---|
| TXN       | 46568 | 862,5865 | 2,0929 | 0,0024 | 0 |
| C14ORF172 | 2951  | 859,8615 | 1,978  | 0,0024 | 0 |
| TFIP11    | 45100 | 855,2194 | 1,9631 | 0,0024 | 0 |
| CBX3      | 4545  | 864,2001 | 1,991  | 0,0025 | 0 |
| SLC25A4   | 42963 | 859,7795 | 1,9852 | 0,0025 | 0 |
| STX4      | 44374 | 858,662  | 1,9685 | 0,0025 | 0 |
| C3ORF14   | 3717  | 880,2125 | 1,7076 | 0,0025 | 0 |
| NME1      | 36681 | 869,4592 | 2,1179 | 0,0026 | 0 |
| SUSD1     | 44469 | 878,0569 | 1,9959 | 0,0026 | 0 |
| HSPA9     | 25022 | 872,2625 | 1,9696 | 0,0026 | 0 |
| EBI2      | 7985  | 885,5777 | 1,9377 | 0,0026 | 0 |
| SPAG1     | 43781 | 866,1869 | 1,9362 | 0,0026 | 0 |
| FOSL1     | 10104 | 870,6502 | 1,9327 | 0,0026 | 0 |
| SEMA7A    | 42287 | 887,0474 | 1,929  | 0,0026 | 0 |
| HECTD2    | 11778 | 876,2394 | 1,928  | 0,0026 | 0 |
| SQSTM1    | 44026 | 899,6175 | 1,9277 | 0,0026 | 0 |
| LOC654244 | 33519 | 874,3673 | 1,9233 | 0,0026 | 0 |
| ZC3H8     | 47845 | 904,0498 | 1,9106 | 0,0026 | 0 |
| ETNK1     | 8571  | 894,5972 | 1,9001 | 0,0026 | 0 |
| SBDS      | 41975 | 902,8669 | 1,8901 | 0,0026 | 0 |
| TAGAP     | 44676 | 911,3128 | 2,023  | 0,0027 | 0 |
| FAM100B   | 8747  | 909,0845 | 1,9193 | 0,0027 | 0 |
| TBC1D19   | 44769 | 914,9513 | 2,3266 | 0,0028 | 0 |
| HOOK1     | 12158 | 926,4026 | 2,013  | 0,0028 | 0 |
| PER3      | 38610 | 912,5665 | 1,9948 | 0,0028 | 0 |
| SESN2     | 42424 | 926,5833 | 1,9799 | 0,0028 | 0 |
| MPP6      | 35556 | 922,8892 | 1,9739 | 0,0028 | 0 |
| IQGAP2    | 25666 | 914,2578 | 1,9493 | 0,0028 | 0 |
| FUBP1     | 10306 | 919,3044 | 1,8893 | 0,0028 | 0 |
| GNA13     | 10953 | 928,8846 | 1,95   | 0,0029 | 0 |
| PLEKHA7   | 39133 | 938,5558 | 2,0563 | 0,003  | 0 |
| GIT1      | 10806 | 933,8117 | 1,9798 | 0,003  | 0 |
| MRPL47    | 35672 | 934,8812 | 1,9622 | 0,003  | 0 |
| CENTG3    | 5328  | 936,3892 | 1,8724 | 0,003  | 0 |
| TIMM8A    | 45263 | 937,8705 | 2,0064 | 0,0031 | 0 |
| JMJD3     | 25864 | 939,5726 | 1,9067 | 0,0031 | 0 |
| GNL3      | 11003 | 942,1322 | 2,0715 | 0,0032 | 0 |
| ZNF263    | 48173 | 948,3675 | 1,9507 | 0,0032 | 0 |
| OTUD6B    | 37893 | 953,1199 | 1,9629 | 0,0033 | 0 |
| NEDD9     | 36412 | 957,3043 | 1,8818 | 0,0033 | 0 |
| PTRH2     | 40332 | 971,2655 | 2,002  | 0,0034 | 0 |
| KCNK12    | 26043 | 961,6248 | 1,9894 | 0,0034 | 0 |
| CIRH1A    | 5611  | 966,9254 | 1,9097 | 0,0034 | 0 |
| TFAM      | 45063 | 968,4229 | 1,9004 | 0,0034 | 0 |
| EBI2      | 7986  | 974,5088 | 1,8062 | 0,0034 | 0 |
| EIF1AY    | 8169  | 974,3061 | 1,3309 | 0,0034 | 0 |
| ARL5B     | 1532  | 967,6813 | 1,9923 | 0,0035 | 0 |

|           |       |           |        |        |   |
|-----------|-------|-----------|--------|--------|---|
| GCLM      | 10643 | 976,8359  | 1,9858 | 0,0035 | 0 |
| TNF       | 45717 | 988,5884  | 1,981  | 0,0035 | 0 |
| HIF1A     | 11877 | 983,0448  | 1,9725 | 0,0035 | 0 |
| NIN       | 36582 | 978,5755  | 1,9349 | 0,0035 | 0 |
| LARP2     | 26991 | 972,8493  | 1,8924 | 0,0035 | 0 |
| CDKN1A    | 5196  | 983,5582  | 1,8524 | 0,0035 | 0 |
| HES6      | 11822 | 1009,9772 | 2,0336 | 0,0037 | 0 |
| TXNRD1    | 46600 | 999,3431  | 1,9333 | 0,0037 | 0 |
| RRAD      | 41703 | 1000,0667 | 1,9129 | 0,0037 | 0 |
| GRPEL1    | 11424 | 1009,6999 | 1,9109 | 0,0037 | 0 |
| EYA3      | 8665  | 1009,5488 | 1,8838 | 0,0037 | 0 |
| NME1      | 36683 | 1028,4863 | 1,9974 | 0,0038 | 0 |
| CTPS      | 6571  | 1013,8004 | 1,9932 | 0,0038 | 0 |
| ABCE1     | 133   | 1011,8823 | 1,9665 | 0,0038 | 0 |
| MKI67IP   | 35350 | 1011,2732 | 1,9496 | 0,0038 | 0 |
| SACS      | 41903 | 1025,1172 | 1,9468 | 0,0038 | 0 |
| SELK      | 42243 | 1019,8115 | 1,9258 | 0,0038 | 0 |
| SPAG9     | 43803 | 1020,9094 | 1,9043 | 0,0038 | 0 |
| ILVBL     | 25528 | 1022,3487 | 1,8941 | 0,0038 | 0 |
| C9ORF21   | 4132  | 1027,9766 | 1,8825 | 0,0038 | 0 |
| SLC25A4   | 42964 | 1013,2804 | 1,8649 | 0,0038 | 0 |
| TCEB1     | 44893 | 1011,7983 | 1,8567 | 0,0038 | 0 |
| NUP35     | 37135 | 1033,2291 | 1,9005 | 0,0039 | 0 |
| ERF       | 8502  | 1032,081  | 1,8829 | 0,0039 | 0 |
| BEX2      | 2329  | 1033,0297 | 1,8011 | 0,0039 | 0 |
| SLC4A7    | 43199 | 1044,7798 | 1,9809 | 0,004  | 0 |
| IER3      | 25195 | 1037,6735 | 1,9736 | 0,004  | 0 |
| USP36     | 47030 | 1046,6804 | 1,9214 | 0,004  | 0 |
| SPAG9     | 43802 | 1042,0904 | 1,9203 | 0,004  | 0 |
| RBM13     | 40805 | 1042,8773 | 1,8935 | 0,004  | 0 |
| WDR43     | 47418 | 1050,7846 | 1,8744 | 0,004  | 0 |
| GOT1      | 11070 | 1045,4835 | 1,8513 | 0,004  | 0 |
| METRNL    | 35050 | 1054,3566 | 2,026  | 0,0041 | 0 |
| NMD3      | 36679 | 1067,8174 | 1,9759 | 0,0041 | 0 |
| HS.521338 | 16616 | 1059,6963 | 1,9499 | 0,0041 | 0 |
| LOC440093 | 28569 | 1057,4334 | 1,8334 | 0,0041 | 0 |
| MESDC1    | 35039 | 1065,9589 | 1,8227 | 0,0041 | 0 |
| FKBP1A    | 9509  | 1064,2183 | 1,8188 | 0,0041 | 0 |
| CEBPG     | 5271  | 1061,7355 | 1,8168 | 0,0041 | 0 |
| MRPL15    | 35618 | 1075,7555 | 1,9516 | 0,0043 | 0 |
| CENPM     | 5302  | 1072,8205 | 1,9194 | 0,0043 | 0 |
| RPP40     | 41611 | 1084,5935 | 1,9379 | 0,0044 | 0 |
| PPAN      | 39462 | 1080,3052 | 1,9187 | 0,0044 | 0 |
| SLC3A2    | 43151 | 1084,5712 | 1,8766 | 0,0044 | 0 |
| CLLU1OS   | 5772  | 1079,0707 | 1,7125 | 0,0044 | 0 |
| LOC652864 | 32942 | 1090,3838 | 1,9214 | 0,0045 | 0 |
| TAF9      | 44670 | 1088,5287 | 1,8586 | 0,0045 | 0 |

|           |       |           |        |        |          |
|-----------|-------|-----------|--------|--------|----------|
| TIMM10    | 45252 | 1097,5317 | 1,8077 | 0,0045 | 0        |
| CD69      | 4999  | 1101,2184 | 1,982  | 0,0046 | 0        |
| ARL4A     | 1526  | 1102,6831 | 1,9281 | 0,0046 | 0        |
| LYAR      | 34377 | 1109,8413 | 1,9292 | 0,0048 | 0        |
| AEBP2     | 586   | 1116,629  | 1,8878 | 0,0049 | 0        |
| FYN       | 10367 | 1122,0669 | 2,0181 | 0,005  | 0        |
| CCDC86    | 4734  | 1122,3386 | 1,9365 | 0,005  | 0        |
| TMEM185B  | 45530 | 1125,327  | 1,8535 | 0,005  | 0        |
| LOC374443 | 27946 | 1134,5214 | 1,9385 | 0,0051 | 0        |
| STCH      | 44273 | 1125,1451 | 1,8478 | 0,0051 | 0        |
| SFPQ      | 42477 | 1133,7054 | 1,8418 | 0,0051 | 0        |
| EIF2S1    | 8188  | 1124,0284 | 1,8175 | 0,0051 | 0        |
| THUMPD2   | 45217 | 1132,0017 | 1,8105 | 0,0051 | 0        |
| AKAP12    | 746   | 1137,5532 | 2,0228 | 0,0052 | 0        |
| SRFBP1    | 44045 | 1136,4697 | 1,8304 | 0,0052 | 0        |
| C12ORF44  | 2844  | 1135,2054 | 1,7762 | 0,0052 | 0        |
| TXN       | 46569 | 1148,7007 | 1,9796 | 0,0053 | 0        |
| DDX21     | 7068  | 1148,2039 | 1,908  | 0,0053 | 0        |
| C10ORF2   | 2664  | 1145,1567 | 1,9032 | 0,0053 | 0        |
| PDE12     | 38445 | 1142,856  | 1,7964 | 0,0053 | 0        |
| GADD45G   | 10462 | 1153,9415 | 1,8417 | 0,0054 | 0        |
| HMOX1     | 12091 | 1156,6445 | 1,843  | 0,0055 | 0        |
| GLYATL2   | 10920 | 1162,8488 | 1,9315 | 0,0057 | 0        |
| C6ORF115  | 3876  | 1165,0714 | 1,886  | 0,0057 | 0        |
| LOC641825 | 29006 | 1162,4464 | 1,8316 | 0,0057 | 0        |
| FXR2      | 10344 | 1166,0654 | 1,8054 | 0,0057 | 0        |
| NCOA6IP   | 36317 | 1164,1718 | 1,7846 | 0,0058 | 0        |
| ADORA2A   | 551   | 1171,5627 | 1,7083 | 0,0058 | 0        |
| HNRNPAB   | 12113 | 1180,0005 | 1,936  | 0,0059 | 0        |
| UGT8      | 46857 | 1191,1661 | 1,7687 | 0,0061 | 0        |
| UCK2      | 46791 | 1201,0142 | 1,8931 | 0,0062 | 0        |
| HIF1A     | 11876 | 1196,5677 | 1,8646 | 0,0062 | 0        |
| GABARAPL2 | 10412 | 1202,4276 | 1,8515 | 0,0062 | 0        |
| MTHFD2    | 35848 | 1197,041  | 1,8468 | 0,0062 | 0        |
| ZNF259    | 48170 | 1190,4313 | 1,8287 | 0,0062 | 0        |
| NRAS      | 36938 | 1204,1088 | 1,7695 | 0,0062 | 0        |
| E2F6      | 7971  | 1210,536  | 1,7673 | 0,0064 | 0        |
| GALNT11   | 10512 | 1216,1734 | 1,8857 | 0,0065 | 0        |
| RRP12     | 41726 | 1214,8703 | 1,8767 | 0,0065 | 0        |
| TRIM29    | 46082 | 1218,842  | 1,7549 | 0,0066 | 0        |
| TFB2M     | 45078 | 1229,7494 | 1,8872 | 0,0069 | 1,00E-04 |
| LOC401321 | 28452 | 1239,7985 | 1,8802 | 0,0071 | 1,00E-04 |
| CAMK2N2   | 4358  | 1238,058  | 1,858  | 0,0071 | 1,00E-04 |
| ISG20L1   | 25722 | 1238,8339 | 1,8495 | 0,0071 | 1,00E-04 |
| TUBB2A    | 46513 | 1240,2497 | 1,7655 | 0,0071 | 1,00E-04 |
| GTPBP4    | 11546 | 1243,9341 | 1,8485 | 0,0072 | 1,00E-04 |
| GADD45B   | 10461 | 1243,828  | 1,831  | 0,0072 | 1,00E-04 |



|           |       |           |        |        |          |
|-----------|-------|-----------|--------|--------|----------|
| PTS       | 40334 | 1244,8499 | 1,8002 | 0,0072 | 1,00E-04 |
| KPNA4     | 26715 | 1247,348  | 1,7514 | 0,0072 | 1,00E-04 |
| NMD3      | 36680 | 1254,748  | 1,8773 | 0,0073 | 1,00E-04 |
| SLC25A19  | 42926 | 1254,463  | 1,8097 | 0,0073 | 1,00E-04 |
| TLE1      | 45299 | 1251,8825 | 1,8015 | 0,0073 | 1,00E-04 |
| MAPKAPK2  | 34723 | 1249,4456 | 1,7892 | 0,0073 | 1,00E-04 |
| C1ORF51   | 3384  | 1255,7632 | 1,7666 | 0,0073 | 1,00E-04 |
| LY9       | 34374 | 1253,1357 | 1,7201 | 0,0073 | 1,00E-04 |
| AKAP12    | 743   | 1262,677  | 1,9891 | 0,0074 | 1,00E-04 |
| KIAA0020  | 26162 | 1261,4915 | 1,8594 | 0,0074 | 1,00E-04 |
| ATF3      | 1772  | 1258,9976 | 1,8177 | 0,0074 | 1,00E-04 |
| IRF2BP2   | 25687 | 1258,5902 | 1,8088 | 0,0074 | 1,00E-04 |
| TSC22D2   | 46263 | 1261,3192 | 1,7701 | 0,0074 | 1,00E-04 |
| BZW2      | 2636  | 1266,8988 | 1,8918 | 0,0075 | 1,00E-04 |
| LARP4     | 26993 | 1273,28   | 1,8479 | 0,0075 | 1,00E-04 |
| SELT      | 42254 | 1273,8663 | 1,8162 | 0,0075 | 1,00E-04 |
| RNF19A    | 41366 | 1271,1049 | 1,8115 | 0,0075 | 1,00E-04 |
| PHLDA1    | 38808 | 1263,9819 | 1,8052 | 0,0075 | 1,00E-04 |
| EIF3J     | 8204  | 1274,8235 | 1,7758 | 0,0075 | 1,00E-04 |
| RBKS      | 40791 | 1269,4989 | 1,7347 | 0,0075 | 1,00E-04 |
| PIM3      | 38926 | 1287,4762 | 1,8029 | 0,0076 | 1,00E-04 |
| EIF3A     | 8191  | 1282,3453 | 1,7712 | 0,0076 | 1,00E-04 |
| MRPL32    | 35643 | 1288,0714 | 1,7494 | 0,0076 | 1,00E-04 |
| CDKN3     | 5215  | 1287,9725 | 1,7474 | 0,0076 | 1,00E-04 |
| SNAPC1    | 43480 | 1289,3961 | 1,7337 | 0,0076 | 1,00E-04 |
| FABP5     | 8714  | 1291,0508 | 1,7327 | 0,0076 | 1,00E-04 |
| ANKRD9    | 1150  | 1295,0354 | 1,8513 | 0,0077 | 1,00E-04 |
| PI4K2A    | 38836 | 1294,8909 | 1,8125 | 0,0077 | 1,00E-04 |
| WDR74     | 47464 | 1297,1747 | 1,7995 | 0,0077 | 1,00E-04 |
| PDSS1     | 38556 | 1304,4613 | 1,8231 | 0,0078 | 1,00E-04 |
| ZNF706    | 48627 | 1302,4047 | 1,7945 | 0,0078 | 1,00E-04 |
| CAB39L    | 4224  | 1304,595  | 1,7837 | 0,0078 | 1,00E-04 |
| NR4A1     | 36919 | 1304,9974 | 1,7666 | 0,0078 | 1,00E-04 |
| LOC151579 | 27504 | 1312,5682 | 1,8252 | 0,0079 | 1,00E-04 |
| AMD1      | 946   | 1310,6006 | 1,8019 | 0,0079 | 1,00E-04 |
| C18ORF19  | 3156  | 1315,7485 | 1,8259 | 0,008  | 1,00E-04 |
| FBXO11    | 9206  | 1315,5404 | 1,7611 | 0,008  | 1,00E-04 |
| TBC1D7    | 44797 | 1323,216  | 1,8709 | 0,0081 | 1,00E-04 |
| CISD1     | 5613  | 1324,2449 | 1,8427 | 0,0081 | 1,00E-04 |
| MAP6D1    | 34676 | 1326,0515 | 1,837  | 0,0081 | 1,00E-04 |
| BACE2     | 2104  | 1323,9326 | 1,8291 | 0,0081 | 1,00E-04 |
| C4ORF32   | 3811  | 1322,8787 | 1,8264 | 0,0081 | 1,00E-04 |
| PAK1IP1   | 38036 | 1326,6333 | 1,7797 | 0,0081 | 1,00E-04 |
| SEMA6B    | 42278 | 1322,1363 | 1,7433 | 0,0081 | 1,00E-04 |
| CYP20A1   | 6779  | 1322,6253 | 1,712  | 0,0081 | 1,00E-04 |
| MIDN      | 35321 | 1335,0773 | 1,7971 | 0,0082 | 1,00E-04 |
| XBP1      | 47636 | 1329,4864 | 1,752  | 0,0082 | 1,00E-04 |

|          |       |           |        |        |          |
|----------|-------|-----------|--------|--------|----------|
| PEA15    | 38582 | 1341,5068 | 1,7309 | 0,0084 | 1,00E-04 |
| PPRC1    | 39673 | 1348,9413 | 1,8138 | 0,0086 | 1,00E-04 |
| TMEM107  | 45412 | 1351,7375 | 1,4491 | 0,0086 | 1,00E-04 |
| RPL29    | 41546 | 1361,4628 | 1,8136 | 0,0087 | 1,00E-04 |
| NDFIP2   | 36332 | 1366,2246 | 1,8074 | 0,0087 | 1,00E-04 |
| TIMM9    | 45265 | 1362,6851 | 1,7968 | 0,0087 | 1,00E-04 |
| CLDND1   | 5696  | 1359,4623 | 1,7082 | 0,0087 | 1,00E-04 |
| GNL3     | 11004 | 1366,1713 | 1,8388 | 0,0088 | 1,00E-04 |
| CCNH     | 4828  | 1359,4596 | 1,7674 | 0,0088 | 1,00E-04 |
| KIAA1553 | 26376 | 1376,2489 | 1,7702 | 0,009  | 1,00E-04 |
| NFATC1   | 36483 | 1378,6046 | 1,7651 | 0,0091 | 1,00E-04 |
| CSTF3    | 6473  | 1380,4726 | 1,7529 | 0,0091 | 1,00E-04 |
| SAR1B    | 41955 | 1391,9534 | 1,8127 | 0,0094 | 1,00E-04 |
| ETNK1    | 8573  | 1393,1343 | 1,8117 | 0,0094 | 1,00E-04 |
| GPR137B  | 11166 | 1387,4718 | 1,7613 | 0,0094 | 1,00E-04 |
| PELO     | 38599 | 1386,7044 | 1,7515 | 0,0094 | 1,00E-04 |
| RCL1     | 40921 | 1393,0928 | 1,7491 | 0,0094 | 1,00E-04 |
| HMGA1    | 12062 | 1392,6289 | 1,7378 | 0,0094 | 1,00E-04 |
| RG9MTD1  | 41081 | 1400,0561 | 1,8317 | 0,0095 | 1,00E-04 |
| CYP51A1  | 6853  | 1402,5254 | 1,8198 | 0,0095 | 1,00E-04 |
| BACE2    | 2105  | 1401,2321 | 1,7741 | 0,0095 | 1,00E-04 |
| NR3C1    | 36913 | 1401,6321 | 1,7656 | 0,0095 | 1,00E-04 |
| BCAR3    | 2217  | 1396,8211 | 1,7561 | 0,0095 | 1,00E-04 |
| SLC39A14 | 43132 | 1407,2508 | 1,7994 | 0,0096 | 1,00E-04 |
| RBM12    | 40801 | 1413,305  | 1,7993 | 0,0097 | 1,00E-04 |
| ABCE1    | 134   | 1409,449  | 1,7966 | 0,0097 | 1,00E-04 |
| UBE3A    | 46731 | 1411,4587 | 1,7367 | 0,0097 | 1,00E-04 |
| MRPL13   | 35616 | 1417,9212 | 1,8275 | 0,0098 | 1,00E-04 |
| FYN      | 10364 | 1417,7426 | 1,8132 | 0,0098 | 1,00E-04 |
| POLR1C   | 39354 | 1418,1509 | 1,8018 | 0,0098 | 1,00E-04 |
| HECTD2   | 11776 | 1412,1901 | 1,7992 | 0,0098 | 1,00E-04 |
| BZW1     | 2631  | 1416,1763 | 1,7053 | 0,0098 | 1,00E-04 |
| CD22     | 4927  | 1423,5093 | 1,6705 | 0,01   | 1,00E-04 |
| PMM2     | 39244 | 1434,5003 | 1,745  | 0,0102 | 1,00E-04 |
| CPEB4    | 6165  | 1433,6429 | 1,7327 | 0,0102 | 1,00E-04 |
| ZNF643   | 48552 | 1430,4296 | 1,7223 | 0,0102 | 1,00E-04 |
| NARG1    | 36189 | 1435,8648 | 1,7484 | 0,0103 | 1,00E-04 |
| MAP1LC3B | 34609 | 1440,5443 | 1,7326 | 0,0103 | 1,00E-04 |
| HNRNPAB  | 12114 | 1443,6155 | 1,8239 | 0,0104 | 1,00E-04 |
| GNAI3    | 10960 | 1448,5038 | 1,7911 | 0,0104 | 1,00E-04 |
| EXOSC3   | 8640  | 1448,0082 | 1,7683 | 0,0104 | 1,00E-04 |
| NOLA1    | 36755 | 1442,929  | 1,7208 | 0,0104 | 1,00E-04 |
| TMEM70   | 45623 | 1442,8427 | 1,7048 | 0,0104 | 1,00E-04 |
| RAMP1    | 40643 | 1448,3409 | 1,396  | 0,0104 | 1,00E-04 |
| RASAL1   | 40714 | 1452,5146 | 1,796  | 0,0105 | 1,00E-04 |
| ZBTB32   | 47802 | 1451,7136 | 1,678  | 0,0105 | 1,00E-04 |
| C6ORF66  | 3974  | 1456,4345 | 1,7724 | 0,0106 | 1,00E-04 |

|           |       |           |        |        |          |
|-----------|-------|-----------|--------|--------|----------|
| EEF1E1    | 8069  | 1458,7067 | 1,8118 | 0,0107 | 1,00E-04 |
| LOC728153 | 33622 | 1460,3067 | 1,7122 | 0,0107 | 1,00E-04 |
| TXNRD1    | 46601 | 1461,9734 | 1,8449 | 0,0108 | 1,00E-04 |
| ISG15     | 25720 | 1465,016  | 1,7918 | 0,0108 | 1,00E-04 |
| MAPKAP1   | 34719 | 1466,1351 | 1,7465 | 0,0108 | 1,00E-04 |
| ACSL1     | 306   | 1466,0737 | 1,7451 | 0,0108 | 1,00E-04 |
| THOP1     | 45193 | 1468,9172 | 1,6791 | 0,0108 | 1,00E-04 |
| ECD       | 7994  | 1469,5286 | 1,6618 | 0,0108 | 1,00E-04 |
| KIAA0090  | 26165 | 1468,1264 | 1,6614 | 0,0108 | 1,00E-04 |
| SRC       | 44033 | 1471,4235 | 1,7799 | 0,0109 | 1,00E-04 |
| NXT1      | 37187 | 1474,3184 | 1,6572 | 0,011  | 1,00E-04 |
| OPN1MW    | 37316 | 1484,9486 | 1,8574 | 0,0112 | 1,00E-04 |
| EIF1AX    | 8167  | 1486,2447 | 1,7683 | 0,0112 | 1,00E-04 |
| SLC12A6   | 42800 | 1482,7067 | 1,6926 | 0,0112 | 1,00E-04 |
| POLR2D    | 39364 | 1485,846  | 1,6812 | 0,0112 | 1,00E-04 |
| IFI30     | 25203 | 1491,795  | 1,7844 | 0,0113 | 1,00E-04 |
| KLF4      | 26592 | 1494,1404 | 1,7753 | 0,0113 | 1,00E-04 |
| LY6E      | 34358 | 1492,0296 | 1,7619 | 0,0113 | 1,00E-04 |
| SLC1A5    | 42858 | 1496,5578 | 1,7377 | 0,0113 | 1,00E-04 |
| TP53INP2  | 45892 | 1493,9614 | 1,7273 | 0,0113 | 1,00E-04 |
| HAMP      | 11649 | 1498,6258 | 1,7267 | 0,0113 | 1,00E-04 |
| C15ORF15  | 2997  | 1497,2408 | 1,7041 | 0,0113 | 1,00E-04 |
| LOC731682 | 33986 | 1496,4735 | 1,3803 | 0,0114 | 1,00E-04 |
| KIF21A    | 26480 | 1505,1816 | 1,8189 | 0,0115 | 1,00E-04 |
| ECE2      | 7996  | 1502,1695 | 1,7751 | 0,0115 | 1,00E-04 |
| FAM131A   | 8838  | 1511,8663 | 1,6832 | 0,0117 | 1,00E-04 |
| UPP1      | 46949 | 1514,2064 | 1,7539 | 0,0118 | 1,00E-04 |
| MAFG      | 34473 | 1512,5153 | 1,6788 | 0,0118 | 1,00E-04 |
| HS.193767 | 13905 | 1520,0633 | 1,7961 | 0,0119 | 1,00E-04 |
| FKBP5     | 9520  | 1521,5823 | 1,7484 | 0,0119 | 1,00E-04 |
| ZNF410    | 48314 | 1524,005  | 1,6816 | 0,0119 | 1,00E-04 |
| MRPS12    | 35691 | 1523,4043 | 1,6602 | 0,0119 | 1,00E-04 |
| RBM28     | 40824 | 1528,5348 | 1,7215 | 0,012  | 1,00E-04 |
| SLC3A2    | 43149 | 1537,2002 | 1,6696 | 0,0122 | 1,00E-04 |
| ARF4      | 1383  | 1533,7803 | 1,6413 | 0,0122 | 1,00E-04 |
| DPH3      | 7706  | 1536,9311 | 1,6865 | 0,0123 | 1,00E-04 |
| ADNP2     | 546   | 1544,8932 | 1,7169 | 0,0124 | 1,00E-04 |
| TOP1P2    | 45860 | 1547,9913 | 1,7044 | 0,0124 | 1,00E-04 |
| BACH2     | 2110  | 1542,6769 | 1,7038 | 0,0124 | 1,00E-04 |
| DCTN6     | 6993  | 1543,8676 | 1,649  | 0,0124 | 1,00E-04 |
| SC4MOL    | 41988 | 1553,751  | 1,6458 | 0,0125 | 1,00E-04 |
| ZC3H15    | 47836 | 1558,0702 | 1,7369 | 0,0126 | 1,00E-04 |
| JOSD1     | 25870 | 1553,4135 | 1,7325 | 0,0126 | 1,00E-04 |
| NAB1      | 36130 | 1551,7763 | 1,7108 | 0,0126 | 1,00E-04 |
| SAR1A     | 41953 | 1555,7633 | 1,706  | 0,0126 | 1,00E-04 |
| LOC143543 | 27440 | 1555,1573 | 1,6613 | 0,0126 | 1,00E-04 |
| PER2      | 38609 | 1555,0305 | 1,6415 | 0,0126 | 1,00E-04 |

|             |       |           |        |        |          |
|-------------|-------|-----------|--------|--------|----------|
| PTGS2       | 40211 | 1558,2135 | 1,6286 | 0,0126 | 1,00E-04 |
| MPDU1       | 35533 | 1561,8304 | 1,6864 | 0,0127 | 1,00E-04 |
| METRNL      | 35054 | 1570,0508 | 1,8241 | 0,0129 | 1,00E-04 |
| STX11       | 44361 | 1573,1842 | 1,7736 | 0,0129 | 1,00E-04 |
| DDX3X       | 7083  | 1574,6693 | 1,6713 | 0,0129 | 1,00E-04 |
| ZNF706      | 48629 | 1576,2006 | 1,7424 | 0,013  | 1,00E-04 |
| NFATC1      | 36485 | 1579,5676 | 1,7034 | 0,013  | 1,00E-04 |
| CHCHD8      | 5451  | 1577,4301 | 1,6933 | 0,013  | 1,00E-04 |
| VAPA        | 47117 | 1581,2649 | 1,686  | 0,013  | 1,00E-04 |
| CTNNAL1     | 6550  | 1581,5151 | 1,6235 | 0,013  | 1,00E-04 |
| GCLM        | 10644 | 1584,0624 | 1,6946 | 0,0131 | 1,00E-04 |
| FAM35A      | 8935  | 1584,9246 | 1,633  | 0,0131 | 1,00E-04 |
| ZNF331      | 48251 | 1586,1366 | 1,6281 | 0,0131 | 1,00E-04 |
| ARHGEF12    | 1469  | 1588,1872 | 1,6722 | 0,0132 | 1,00E-04 |
| C11ORF31    | 2755  | 1595,1581 | 1,7116 | 0,0134 | 1,00E-04 |
| GPRIN1      | 11285 | 1596,761  | 1,6533 | 0,0134 | 1,00E-04 |
| TFB2M       | 45079 | 1605,1345 | 1,7711 | 0,0137 | 2,00E-04 |
| TIMM23      | 45260 | 1604,892  | 1,7154 | 0,0137 | 2,00E-04 |
| ATP6V1F     | 1950  | 1606,2492 | 1,7139 | 0,0137 | 2,00E-04 |
| HNRNPAB     | 12115 | 1615,2872 | 1,7719 | 0,0139 | 2,00E-04 |
| AZIN1       | 2050  | 1618,817  | 1,7328 | 0,0141 | 2,00E-04 |
| PPAN-P2RY11 | 39463 | 1623,0413 | 1,6968 | 0,0141 | 2,00E-04 |
| USP9X       | 47065 | 1618,2789 | 1,6566 | 0,0141 | 2,00E-04 |
| KLK1        | 26654 | 1633,7479 | 1,7195 | 0,0143 | 2,00E-04 |
| RPS4Y2      | 41667 | 1632,8177 | 1,6479 | 0,0143 | 2,00E-04 |
| MAFF        | 34472 | 1633,6515 | 1,6445 | 0,0143 | 2,00E-04 |
| LONRF3      | 34084 | 1638,2458 | 1,6408 | 0,0143 | 2,00E-04 |
| TOLLIP      | 45836 | 1638,0958 | 1,6387 | 0,0143 | 2,00E-04 |
| CLDND1      | 5697  | 1633,5289 | 1,6227 | 0,0143 | 2,00E-04 |
| PYCR1       | 40401 | 1646,6447 | 1,7575 | 0,0145 | 2,00E-04 |
| ACSL4       | 313   | 1644,1462 | 1,7088 | 0,0145 | 2,00E-04 |
| CCT4        | 4884  | 1649,91   | 1,6181 | 0,0146 | 2,00E-04 |
| CALU        | 4338  | 1655,81   | 1,6335 | 0,0147 | 2,00E-04 |
| TIMM23      | 45259 | 1659,5512 | 1,6811 | 0,0148 | 2,00E-04 |
| PRR6        | 39972 | 1662,0113 | 1,7351 | 0,0149 | 2,00E-04 |
| ADARB1      | 487   | 1662,3677 | 1,7202 | 0,0149 | 2,00E-04 |
| UBIAD1      | 46739 | 1662,2441 | 1,6712 | 0,0149 | 2,00E-04 |
| RBM39       | 40834 | 1663,8824 | 1,6584 | 0,0149 | 2,00E-04 |
| HS.489254   | 16273 | 1667,4285 | 1,7346 | 0,015  | 2,00E-04 |
| NUCB2       | 37068 | 1678,8294 | 1,7066 | 0,0153 | 2,00E-04 |
| LOC653980   | 33437 | 1677,012  | 1,7002 | 0,0153 | 2,00E-04 |
| KLF6        | 26595 | 1673,9864 | 1,679  | 0,0153 | 2,00E-04 |
| PSPC1       | 40148 | 1679,6284 | 1,6517 | 0,0153 | 2,00E-04 |
| TLE3        | 45301 | 1675,5359 | 1,5877 | 0,0153 | 2,00E-04 |
| MCTS1       | 34922 | 1687,6345 | 1,721  | 0,0154 | 2,00E-04 |
| CCT5        | 4885  | 1684,7723 | 1,6911 | 0,0154 | 2,00E-04 |
| NANS        | 36166 | 1682,0108 | 1,6673 | 0,0154 | 2,00E-04 |

|           |       |           |        |        |          |
|-----------|-------|-----------|--------|--------|----------|
| PHF19     | 38772 | 1684,6722 | 1,6424 | 0,0154 | 2,00E-04 |
| EIF3M     | 8206  | 1692,7129 | 1,6995 | 0,0156 | 2,00E-04 |
| ENO2      | 8345  | 1693,1636 | 1,6938 | 0,0156 | 2,00E-04 |
| TNFSF14   | 45771 | 1692,5342 | 1,689  | 0,0156 | 2,00E-04 |
| EAF2      | 7976  | 1703,8767 | 1,7523 | 0,0159 | 2,00E-04 |
| CD40LG    | 4975  | 1704,7476 | 1,7248 | 0,0159 | 2,00E-04 |
| SLC25A25  | 42937 | 1700,6251 | 1,6763 | 0,0159 | 2,00E-04 |
| TUBB2C    | 46516 | 1704,7584 | 1,6674 | 0,0159 | 2,00E-04 |
| ATP1B3    | 1852  | 1701,5568 | 1,649  | 0,0159 | 2,00E-04 |
| EIF5A2    | 8239  | 1702,4552 | 1,6349 | 0,0159 | 2,00E-04 |
| NOLA3     | 36759 | 1703,223  | 1,5847 | 0,0159 | 2,00E-04 |
| MAPRE2    | 34729 | 1715,5065 | 1,6886 | 0,0161 | 2,00E-04 |
| TNFRSF4   | 45752 | 1717,3901 | 1,6397 | 0,0161 | 2,00E-04 |
| MAP1LC3A  | 34608 | 1714,4997 | 1,6306 | 0,0161 | 2,00E-04 |
| LOC644128 | 30020 | 1714,5165 | 1,6111 | 0,0161 | 2,00E-04 |
| CTLA4     | 6542  | 1712,0821 | 1,4333 | 0,0161 | 2,00E-04 |
| GSG1L     | 11445 | 1720,5143 | 1,6705 | 0,0162 | 2,00E-04 |
| HSGT1     | 24988 | 1722,3133 | 1,5888 | 0,0163 | 2,00E-04 |
| HBB       | 11683 | 1722,7433 | 1,1921 | 0,0163 | 2,00E-04 |
| NCL       | 36307 | 1728,4327 | 1,6851 | 0,0165 | 2,00E-04 |
| ARL8B     | 1549  | 1728,2347 | 1,6287 | 0,0165 | 2,00E-04 |
| CREM      | 6270  | 1732,1171 | 1,6719 | 0,0166 | 2,00E-04 |
| TAGAP     | 44675 | 1731,2361 | 1,6569 | 0,0166 | 2,00E-04 |
| BXDC2     | 2625  | 1734,2138 | 1,6552 | 0,0166 | 2,00E-04 |
| HBA2      | 11681 | 1732,2518 | 1,4245 | 0,0166 | 2,00E-04 |
| PPP2CA    | 39614 | 1740,7307 | 1,6732 | 0,0168 | 2,00E-04 |
| HECTD2    | 11777 | 1738,1507 | 1,6732 | 0,0168 | 2,00E-04 |
| GALNT1    | 10508 | 1740,5068 | 1,6695 | 0,0168 | 2,00E-04 |
| NOLA1     | 36756 | 1739,6684 | 1,6636 | 0,0169 | 2,00E-04 |
| TMEM2     | 45550 | 1745,0165 | 1,6426 | 0,0169 | 2,00E-04 |
| ICHTHYIN  | 25161 | 1750,1882 | 1,7093 | 0,0171 | 2,00E-04 |
| SRGN      | 44056 | 1749,3045 | 1,6893 | 0,0171 | 2,00E-04 |
| HBA2      | 11682 | 1751,7544 | 1,2724 | 0,0171 | 2,00E-04 |
| SDCBP     | 42131 | 1754,666  | 1,6764 | 0,0172 | 2,00E-04 |
| HS.534439 | 16886 | 1755,3393 | 1,6378 | 0,0172 | 2,00E-04 |
| AK2       | 723   | 1762,9777 | 1,7305 | 0,0174 | 2,00E-04 |
| UTP11L    | 47070 | 1762,139  | 1,6914 | 0,0175 | 2,00E-04 |
| CAPRIN1   | 4406  | 1766,3021 | 1,6253 | 0,0175 | 2,00E-04 |
| VPS37B    | 47265 | 1762,5144 | 1,5911 | 0,0175 | 2,00E-04 |
| ZEB2      | 47909 | 1766,7    | 1,6901 | 0,0176 | 2,00E-04 |
| TCEB1     | 44892 | 1768,3182 | 1,6633 | 0,0176 | 2,00E-04 |
| ECE2      | 7997  | 1770,9599 | 1,6716 | 0,0177 | 2,00E-04 |
| WDR12     | 47365 | 1775,624  | 1,6915 | 0,0179 | 2,00E-04 |
| KLF10     | 26576 | 1778,583  | 1,669  | 0,0179 | 2,00E-04 |
| DNAJB11   | 7557  | 1778,5081 | 1,6458 | 0,0179 | 2,00E-04 |
| UAP1      | 46629 | 1778,1799 | 1,6759 | 0,018  | 2,00E-04 |
| HIST2H2AC | 11979 | 1781,6467 | 1,6139 | 0,018  | 2,00E-04 |

|             |       |           |        |        |          |
|-------------|-------|-----------|--------|--------|----------|
| RPL34       | 41559 | 1784,5652 | 1,7198 | 0,0181 | 2,00E-04 |
| CD69        | 5000  | 1794,0075 | 1,7824 | 0,0182 | 2,00E-04 |
| SCD         | 42024 | 1792,4856 | 1,4723 | 0,0182 | 2,00E-04 |
| GABPB2      | 10426 | 1793,186  | 1,6677 | 0,0183 | 2,00E-04 |
| FKBP2       | 9514  | 1791,3436 | 1,5969 | 0,0183 | 2,00E-04 |
| HIST2H2AA3  | 11976 | 1803,9182 | 1,6337 | 0,0185 | 2,00E-04 |
| RQCD1       | 41701 | 1811,2024 | 1,6149 | 0,0185 | 2,00E-04 |
| NAF1        | 36141 | 1804,8843 | 1,587  | 0,0185 | 2,00E-04 |
| PSMD12      | 40119 | 1805,4197 | 1,5634 | 0,0185 | 2,00E-04 |
| MRPL50      | 35675 | 1810,5894 | 1,6972 | 0,0186 | 2,00E-04 |
| WDR12       | 47366 | 1815,6824 | 1,6752 | 0,0186 | 2,00E-04 |
| ARMCX6      | 1576  | 1806,1918 | 1,6437 | 0,0186 | 2,00E-04 |
| SNRPG       | 43593 | 1810,5013 | 1,6174 | 0,0186 | 2,00E-04 |
| MAGOH       | 34552 | 1811,0691 | 1,5774 | 0,0186 | 2,00E-04 |
| ZNF26       | 48171 | 1813,8532 | 1,7175 | 0,0187 | 2,00E-04 |
| GFI1        | 10716 | 1810,1998 | 1,6302 | 0,0187 | 2,00E-04 |
| FNDC3A      | 10083 | 1810,2622 | 1,6091 | 0,0187 | 2,00E-04 |
| SP4         | 43766 | 1814,9262 | 1,6056 | 0,0187 | 2,00E-04 |
| OTUD6B      | 37892 | 1824,6193 | 1,6141 | 0,019  | 2,00E-04 |
| KLF9        | 26600 | 1826,2886 | 1,5385 | 0,0191 | 2,00E-04 |
| PHF5A       | 38787 | 1830,6551 | 1,6585 | 0,0192 | 2,00E-04 |
| C1ORF97     | 3434  | 1831,3498 | 1,6411 | 0,0192 | 2,00E-04 |
| LOC649555   | 31874 | 1834,3077 | 1,6823 | 0,0193 | 3,00E-04 |
| CA2         | 4212  | 1834,479  | 1,6093 | 0,0193 | 3,00E-04 |
| PEF1        | 38591 | 1834,9394 | 1,5559 | 0,0193 | 3,00E-04 |
| CCNYL1      | 4846  | 1842,5814 | 1,6657 | 0,0195 | 3,00E-04 |
| HLA-DRB6    | 12027 | 1840,3193 | 1,3165 | 0,0195 | 3,00E-04 |
| NUP35       | 37134 | 1846,1554 | 1,6485 | 0,0196 | 3,00E-04 |
| TIPARP      | 45277 | 1846,1811 | 1,5863 | 0,0196 | 3,00E-04 |
| C1ORF52     | 3385  | 1860,0963 | 1,6203 | 0,0198 | 3,00E-04 |
| SHF         | 42640 | 1852,2144 | 1,6041 | 0,0198 | 3,00E-04 |
| ELK1        | 8268  | 1853,2237 | 1,5774 | 0,0198 | 3,00E-04 |
| SUB1        | 44397 | 1861,8199 | 1,6826 | 0,0199 | 3,00E-04 |
| NCBP2       | 36287 | 1857,1099 | 1,65   | 0,0199 | 3,00E-04 |
| C18ORF1     | 3151  | 1865,3373 | 1,6245 | 0,0199 | 3,00E-04 |
| BOAT        | 2445  | 1859,4191 | 1,6192 | 0,0199 | 3,00E-04 |
| BA16L21.2.1 | 2097  | 1863,5633 | 1,5847 | 0,0199 | 3,00E-04 |
| DLEU2       | 7453  | 1870,5653 | 1,7094 | 0,02   | 3,00E-04 |
| PTPN22      | 40277 | 1868,0225 | 1,6316 | 0,02   | 3,00E-04 |
| C1ORF97     | 3433  | 1868,3255 | 1,6129 | 0,02   | 3,00E-04 |
| RBM12       | 40802 | 1867,1678 | 1,5962 | 0,02   | 3,00E-04 |
| C19ORF10    | 3179  | 1868,4614 | 1,5712 | 0,02   | 3,00E-04 |
| TAF9        | 44671 | 1878,5568 | 1,6486 | 0,0202 | 3,00E-04 |
| TIMM23      | 45257 | 1874,9541 | 1,6275 | 0,0202 | 3,00E-04 |
| EXOSC6      | 8643  | 1883,0598 | 1,5949 | 0,0203 | 3,00E-04 |
| SNORD34     | 43550 | 1886,6767 | 1,6861 | 0,0204 | 3,00E-04 |
| NEDD9       | 36410 | 1882,6001 | 1,5526 | 0,0204 | 3,00E-04 |

|           |       |           |        |        |          |
|-----------|-------|-----------|--------|--------|----------|
| LOC644943 | 30387 | 1890,0186 | 1,7144 | 0,0205 | 3,00E-04 |
| TIMM23    | 45258 | 1893,2981 | 1,6549 | 0,0205 | 3,00E-04 |
| POLR1C    | 39355 | 1891,5484 | 1,6496 | 0,0205 | 3,00E-04 |
| HS.555181 | 20418 | 1889,9226 | 1,6461 | 0,0205 | 3,00E-04 |
| C15ORF5   | 3029  | 1895,0605 | 1,6676 | 0,0206 | 3,00E-04 |
| LOC201164 | 27569 | 1897,42   | 1,6719 | 0,0207 | 3,00E-04 |
| MCOLN3    | 34913 | 1897,7379 | 1,5846 | 0,0207 | 3,00E-04 |
| ETNK1     | 8572  | 1898,9586 | 1,565  | 0,0207 | 3,00E-04 |
| LOC144383 | 27446 | 1896,6822 | 1,6531 | 0,0208 | 3,00E-04 |
| BATF3     | 2173  | 1906,0821 | 1,6996 | 0,0211 | 3,00E-04 |
| CGI-96    | 5427  | 1911,076  | 1,6695 | 0,0211 | 3,00E-04 |
| GFM1      | 10718 | 1910,1005 | 1,6596 | 0,0211 | 3,00E-04 |
| PRKCQ     | 39845 | 1910,6965 | 1,6346 | 0,0211 | 3,00E-04 |
| MRPS7     | 35721 | 1907,4943 | 1,588  | 0,0211 | 3,00E-04 |
| RPL29     | 41545 | 1916,5516 | 1,6854 | 0,0212 | 3,00E-04 |
| ADCY3     | 500   | 1918,6311 | 1,5959 | 0,0212 | 3,00E-04 |
| MAFG      | 34474 | 1915,6159 | 1,5579 | 0,0212 | 3,00E-04 |
| G3BP1     | 10385 | 1923,8148 | 1,686  | 0,0214 | 3,00E-04 |
| RAN       | 40648 | 1924,4741 | 1,676  | 0,0214 | 3,00E-04 |
| ATF4      | 1776  | 1922,6819 | 1,661  | 0,0214 | 3,00E-04 |
| LMBR1     | 27308 | 1926,3447 | 1,6465 | 0,0214 | 3,00E-04 |
| PINX1     | 38930 | 1921,6899 | 1,621  | 0,0214 | 3,00E-04 |
| SBDSP     | 41976 | 1925,7476 | 1,5792 | 0,0214 | 3,00E-04 |
| C9ORF105  | 4091  | 1932,1852 | 1,6821 | 0,0215 | 3,00E-04 |
| SAMSN1    | 41937 | 1930,9551 | 1,6649 | 0,0215 | 3,00E-04 |
| COPS2     | 6078  | 1932,7505 | 1,6546 | 0,0215 | 3,00E-04 |
| EIF4A1    | 8208  | 1928,9415 | 1,6485 | 0,0215 | 3,00E-04 |
| LOC649009 | 31716 | 1931,1131 | 1,6151 | 0,0215 | 3,00E-04 |
| PTTG1     | 40337 | 1930,2268 | 1,5863 | 0,0215 | 3,00E-04 |
| RBMX      | 40866 | 1939,2688 | 1,6063 | 0,0218 | 3,00E-04 |
| CTLA4     | 6544  | 1938,5709 | 1,393  | 0,0218 | 3,00E-04 |
| CEBPZ     | 5272  | 1941,0875 | 1,5763 | 0,0219 | 3,00E-04 |
| C7ORF11   | 3988  | 1943,7799 | 1,5404 | 0,0219 | 3,00E-04 |
| CNIH4     | 5878  | 1947,785  | 1,6886 | 0,022  | 3,00E-04 |
| SNX16     | 43621 | 1954,344  | 1,6467 | 0,0221 | 3,00E-04 |
| GMFB      | 10935 | 1956,6784 | 1,6004 | 0,0222 | 3,00E-04 |
| MRPL27    | 35635 | 1953,3593 | 1,5809 | 0,0222 | 3,00E-04 |
| WDSOF1    | 47489 | 1971,2372 | 1,6455 | 0,0229 | 3,00E-04 |
| CLECL1    | 5740  | 1975,9499 | 1,6862 | 0,0232 | 3,00E-04 |
| LOC440926 | 28689 | 1979,1046 | 1,6567 | 0,0232 | 3,00E-04 |
| MRPL47    | 35671 | 1977,5169 | 1,6391 | 0,0232 | 3,00E-04 |
| NFIL3     | 36512 | 1979,2898 | 1,6231 | 0,0232 | 3,00E-04 |
| LOC440145 | 28575 | 1984,4791 | 1,571  | 0,0235 | 3,00E-04 |
| HCST      | 11729 | 1995,7861 | 1,6348 | 0,0238 | 3,00E-04 |
| CCNC      | 4809  | 1990,1879 | 1,6315 | 0,0238 | 3,00E-04 |
| TOMM40    | 45846 | 1993,5211 | 1,6175 | 0,0238 | 3,00E-04 |
| LOC221710 | 27605 | 1994,8374 | 1,5731 | 0,0238 | 3,00E-04 |

|           |       |           |        |        |          |
|-----------|-------|-----------|--------|--------|----------|
| PHF6      | 38789 | 1991,5922 | 1,5663 | 0,0238 | 3,00E-04 |
| CCNH      | 4829  | 2002,8916 | 1,577  | 0,0241 | 4,00E-04 |
| MSI2      | 35772 | 2001,1485 | 1,5738 | 0,0241 | 3,00E-04 |
| FAM96B    | 9098  | 2001,3789 | 1,5378 | 0,0241 | 3,00E-04 |
| ILVBL     | 25529 | 2006,4524 | 1,5703 | 0,0242 | 4,00E-04 |
| RASGRP1   | 40729 | 2013,7785 | 1,675  | 0,0244 | 4,00E-04 |
| HS.444152 | 15946 | 2013,6894 | 1,6053 | 0,0245 | 4,00E-04 |
| MGC4677   | 35241 | 2018,9245 | 1,7687 | 0,0246 | 4,00E-04 |
| SLC20A1   | 42861 | 2016,3499 | 1,5787 | 0,0246 | 4,00E-04 |
| CD86      | 5021  | 2022,3377 | 1,6329 | 0,0248 | 4,00E-04 |
| HS.569162 | 22477 | 2028,8757 | 1,6207 | 0,025  | 4,00E-04 |
| HMGCR     | 12077 | 2033,2504 | 1,6342 | 0,0252 | 4,00E-04 |
| YWHAG     | 47753 | 2038,3776 | 1,6326 | 0,0253 | 4,00E-04 |
| TMEM170   | 45507 | 2040,5505 | 1,6036 | 0,0253 | 4,00E-04 |
| CCNYL1    | 4845  | 2034,9155 | 1,6    | 0,0253 | 4,00E-04 |
| CIITA     | 5603  | 2038,1038 | 1,6521 | 0,0254 | 4,00E-04 |
| NEK6      | 36436 | 2042,2588 | 1,6261 | 0,0254 | 4,00E-04 |
| TAGAP     | 44674 | 2042,4522 | 1,5847 | 0,0254 | 4,00E-04 |
| LONRF1    | 34080 | 2037,1824 | 1,5845 | 0,0254 | 4,00E-04 |
| CYP20A1   | 6780  | 2038,1027 | 1,5612 | 0,0254 | 4,00E-04 |
| COX17     | 6120  | 2043,6701 | 1,5406 | 0,0254 | 4,00E-04 |
| BXDC5     | 2626  | 2048,7793 | 1,5827 | 0,0257 | 4,00E-04 |
| E2F3      | 7967  | 2057,565  | 1,583  | 0,0258 | 4,00E-04 |
| RPL41     | 41579 | 2055,7472 | 1,6331 | 0,0259 | 4,00E-04 |
| ERN1      | 8525  | 2056,1607 | 1,6247 | 0,0259 | 4,00E-04 |
| PHF5A     | 38788 | 2057,5642 | 1,616  | 0,0259 | 4,00E-04 |
| CST7      | 6461  | 2057,4002 | 1,599  | 0,0259 | 4,00E-04 |
| GUF1      | 11572 | 2057,0369 | 1,529  | 0,0259 | 4,00E-04 |
| ATP6V0A2  | 1924  | 2063,6121 | 1,6532 | 0,0261 | 4,00E-04 |
| TFRC      | 45107 | 2064,3468 | 1,634  | 0,0261 | 4,00E-04 |
| HSPE1     | 25048 | 2071,7986 | 1,6336 | 0,0264 | 4,00E-04 |
| RRN3      | 41725 | 2070,5459 | 1,6106 | 0,0264 | 4,00E-04 |
| TESK1     | 45038 | 2075,4631 | 1,4466 | 0,0265 | 4,00E-04 |
| CAPZA1    | 4416  | 2086,0894 | 1,6452 | 0,027  | 4,00E-04 |
| SNORD68   | 43568 | 2086,4798 | 1,5888 | 0,027  | 4,00E-04 |
| ADPRHL2   | 560   | 2092,3004 | 1,5948 | 0,0273 | 4,00E-04 |
| IRF2BP2   | 25688 | 2098,3025 | 1,552  | 0,0276 | 4,00E-04 |
| OAS1      | 37197 | 2099,303  | 1,7174 | 0,0277 | 4,00E-04 |
| CDKN1A    | 5197  | 2100,2541 | 1,6074 | 0,0277 | 4,00E-04 |
| EIF1      | 8164  | 2103,3132 | 1,5742 | 0,0279 | 4,00E-04 |
| KIAA0672  | 26244 | 2105,597  | 1,504  | 0,028  | 4,00E-04 |
| HS.548831 | 19829 | 2111,4909 | 1,5946 | 0,0282 | 4,00E-04 |
| CD164     | 4907  | 2114,34   | 1,63   | 0,0283 | 4,00E-04 |
| NIN       | 36583 | 2116,2425 | 1,6026 | 0,0284 | 4,00E-04 |
| MRPL36    | 35650 | 2116,915  | 1,5914 | 0,0284 | 4,00E-04 |
| FYN       | 10365 | 2123,4932 | 1,6825 | 0,0286 | 4,00E-04 |
| ERGIC2    | 8509  | 2122,3597 | 1,6213 | 0,0286 | 4,00E-04 |



|           |       |           |        |        |          |
|-----------|-------|-----------|--------|--------|----------|
| TRAF5     | 45985 | 2122,2371 | 1,5597 | 0,0286 | 4,00E-04 |
| NCOA7     | 36318 | 2126,2795 | 1,5576 | 0,0286 | 4,00E-04 |
| FNDC3A    | 10081 | 2124,1048 | 1,5423 | 0,0286 | 4,00E-04 |
| ATP1B3    | 1854  | 2128,8833 | 1,6171 | 0,0287 | 4,00E-04 |
| EIF5B     | 8242  | 2138,0941 | 1,5323 | 0,0292 | 5,00E-04 |
| ARL5A     | 1530  | 2141,6269 | 1,6318 | 0,0293 | 5,00E-04 |
| MAP2K3    | 34625 | 2141,4388 | 1,5092 | 0,0294 | 5,00E-04 |
| GOSR2     | 11068 | 2147,166  | 1,6008 | 0,0295 | 5,00E-04 |
| RPL6      | 41583 | 2146,5589 | 1,5881 | 0,0295 | 5,00E-04 |
| XBP1      | 47637 | 2145,748  | 1,5678 | 0,0295 | 5,00E-04 |
| CD55      | 4988  | 2151,6303 | 1,6115 | 0,0296 | 5,00E-04 |
| U2AF1     | 46619 | 2149,7424 | 1,5421 | 0,0296 | 5,00E-04 |
| TMEM93    | 45650 | 2151,4312 | 1,5306 | 0,0296 | 5,00E-04 |
| KCTD9     | 26135 | 2148,7809 | 1,5283 | 0,0296 | 5,00E-04 |
| KLF6      | 26597 | 2152,7087 | 1,5862 | 0,0297 | 5,00E-04 |
| CCND1     | 4810  | 2153,678  | 1,5235 | 0,0297 | 5,00E-04 |
| IRF8      | 25698 | 2155,8684 | 1,6302 | 0,0298 | 5,00E-04 |
| CD63      | 4995  | 2157,549  | 1,6142 | 0,0299 | 5,00E-04 |
| TIMM44    | 45261 | 2162,1349 | 1,5392 | 0,0299 | 5,00E-04 |
| PSMD8     | 40132 | 2160,9613 | 1,5002 | 0,0299 | 5,00E-04 |
| LTV1      | 34345 | 2167,6406 | 1,6083 | 0,0301 | 5,00E-04 |
| B4GALT5   | 2093  | 2167,126  | 1,5952 | 0,0301 | 5,00E-04 |
| IRF4      | 25690 | 2169,2627 | 1,6421 | 0,0302 | 5,00E-04 |
| MTRR      | 35898 | 2172,4948 | 1,5224 | 0,0303 | 5,00E-04 |
| ASNS      | 1723  | 2177,4982 | 1,532  | 0,0306 | 5,00E-04 |
| PLK3      | 39180 | 2180,0859 | 1,5686 | 0,0307 | 5,00E-04 |
| RALGDS    | 40635 | 2180,9637 | 1,5627 | 0,0307 | 5,00E-04 |
| SDCBP     | 42132 | 2184,9522 | 1,5796 | 0,0309 | 5,00E-04 |
| CXORF26   | 6690  | 2184,333  | 1,5732 | 0,0309 | 5,00E-04 |
| LCP1      | 27080 | 2187,7788 | 1,5663 | 0,031  | 5,00E-04 |
| NFAT5     | 36480 | 2189,6129 | 1,5449 | 0,031  | 5,00E-04 |
| PHC2      | 38744 | 2193,0112 | 1,5243 | 0,0311 | 5,00E-04 |
| C12ORF49  | 2849  | 2193,5278 | 1,5178 | 0,0311 | 5,00E-04 |
| LOC440145 | 28576 | 2196,0479 | 1,5514 | 0,0313 | 5,00E-04 |
| LOC651524 | 32413 | 2198,8535 | 1,5457 | 0,0314 | 5,00E-04 |
| RBBP6     | 40778 | 2198,2951 | 1,5066 | 0,0314 | 5,00E-04 |
| GNPDA1    | 11012 | 2206,3557 | 1,6127 | 0,0317 | 5,00E-04 |
| CTNNAL1   | 6551  | 2206,3514 | 1,5312 | 0,0318 | 5,00E-04 |
| PHF19     | 38771 | 2210,543  | 1,5301 | 0,0319 | 5,00E-04 |
| BTBD7     | 2572  | 2208,6097 | 1,5033 | 0,0319 | 5,00E-04 |
| RAP1B     | 40670 | 2212,8099 | 1,618  | 0,032  | 5,00E-04 |
| RAP1A     | 40667 | 2215,4492 | 1,5495 | 0,0322 | 5,00E-04 |
| MRPL17    | 35620 | 2221,1346 | 1,6149 | 0,0323 | 5,00E-04 |
| TNS3      | 45828 | 2229,1107 | 1,6432 | 0,0327 | 5,00E-04 |
| PIGR      | 38880 | 2227,2715 | 1,521  | 0,0327 | 5,00E-04 |
| CNKSR3    | 5881  | 2235,2253 | 1,5381 | 0,0331 | 5,00E-04 |
| FAM36A    | 8937  | 2239,0564 | 1,5633 | 0,0333 | 5,00E-04 |

|            |       |           |        |        |          |
|------------|-------|-----------|--------|--------|----------|
| FGFRL1     | 9454  | 2238,8143 | 1,5409 | 0,0333 | 5,00E-04 |
| SLC30A5    | 43053 | 2239,9557 | 1,5303 | 0,0333 | 5,00E-04 |
| PTGS1      | 40209 | 2243,4547 | 1,3962 | 0,0335 | 6,00E-04 |
| EVI2A      | 8595  | 2248,2303 | 1,5849 | 0,0336 | 6,00E-04 |
| INSIG1     | 25606 | 2247,2825 | 1,5804 | 0,0336 | 6,00E-04 |
| TUBB4Q     | 46519 | 2246,0724 | 1,5796 | 0,0336 | 6,00E-04 |
| SPATA2L    | 43840 | 2248,1476 | 1,5625 | 0,0336 | 6,00E-04 |
| GPR65      | 11250 | 2247,7212 | 1,4988 | 0,0336 | 6,00E-04 |
| WDR74      | 47462 | 2250,2983 | 1,6119 | 0,0337 | 6,00E-04 |
| EIF6       | 8243  | 2250,601  | 1,557  | 0,0337 | 6,00E-04 |
| IFRD1      | 25257 | 2259,2876 | 1,5757 | 0,0339 | 6,00E-04 |
| NIN        | 36585 | 2258,8756 | 1,5718 | 0,034  | 6,00E-04 |
| DNTTIP2    | 7657  | 2256,7577 | 1,5657 | 0,034  | 6,00E-04 |
| MFN1       | 35096 | 2260,1274 | 1,5538 | 0,034  | 6,00E-04 |
| LOC650128  | 32029 | 2258,5684 | 1,5379 | 0,034  | 6,00E-04 |
| STAG3L4    | 44221 | 2256,2847 | 1,5282 | 0,034  | 6,00E-04 |
| RN7SK      | 41264 | 2257,8813 | 1,4323 | 0,034  | 6,00E-04 |
| PLEK       | 39121 | 2263,2996 | 1,6462 | 0,0342 | 6,00E-04 |
| HS.551538  | 20056 | 2265,2345 | 1,4696 | 0,0343 | 6,00E-04 |
| EHMT1      | 8152  | 2266,7614 | 1,5089 | 0,0344 | 6,00E-04 |
| SPRYD4     | 43994 | 2271,078  | 1,6098 | 0,0346 | 6,00E-04 |
| HIST2H2AA3 | 11977 | 2273,6413 | 1,5736 | 0,0347 | 6,00E-04 |
| BANP       | 2152  | 2273,5217 | 1,5535 | 0,0347 | 6,00E-04 |
| CCDC59     | 4696  | 2277,1115 | 1,5696 | 0,0348 | 6,00E-04 |
| DAZAP1     | 6915  | 2274,8177 | 1,5477 | 0,0348 | 6,00E-04 |
| DUS3L      | 7855  | 2276,3141 | 1,5456 | 0,0348 | 6,00E-04 |
| SLC7A1     | 43251 | 2277,29   | 1,5368 | 0,0348 | 6,00E-04 |
| AK2        | 725   | 2282,6063 | 1,6035 | 0,035  | 6,00E-04 |
| C9ORF123   | 4104  | 2283,5835 | 1,5313 | 0,035  | 6,00E-04 |
| LOC652481  | 32720 | 2289,9959 | 1,569  | 0,0353 | 6,00E-04 |
| SHFM1      | 42643 | 2295,4198 | 1,5316 | 0,0357 | 6,00E-04 |
| UBXD5      | 46779 | 2295,1065 | 1,5043 | 0,0357 | 6,00E-04 |
| ASNS       | 1724  | 2297,8199 | 1,5373 | 0,0358 | 6,00E-04 |
| ATHL1      | 1807  | 2296,6705 | 1,4668 | 0,0358 | 6,00E-04 |
| RGS16      | 41132 | 2301,5565 | 1,6063 | 0,036  | 6,00E-04 |
| C10ORF119  | 2650  | 2301,1599 | 1,4882 | 0,036  | 6,00E-04 |
| ZYX        | 48800 | 2304,1188 | 1,5086 | 0,0361 | 6,00E-04 |
| CSNK1D     | 6419  | 2303,6467 | 1,4935 | 0,0361 | 6,00E-04 |
| BANP       | 2150  | 2310,1315 | 1,5074 | 0,0364 | 6,00E-04 |
| HS.545589  | 19490 | 2309,5362 | 1,5878 | 0,0365 | 6,00E-04 |
| CHMP2B     | 5504  | 2309,7928 | 1,531  | 0,0365 | 6,00E-04 |
| ALCAM      | 814   | 2308,5632 | 1,5093 | 0,0365 | 6,00E-04 |
| SGPP2      | 42557 | 2317,3726 | 1,5622 | 0,0366 | 6,00E-04 |
| NGLY1      | 36552 | 2319,4598 | 1,5593 | 0,0366 | 6,00E-04 |
| LOC731314  | 33968 | 2317,0454 | 1,5269 | 0,0366 | 6,00E-04 |
| BCCIP      | 2228  | 2318,3372 | 1,5163 | 0,0366 | 6,00E-04 |
| LOC389293  | 28118 | 2317,0237 | 1,5956 | 0,0367 | 6,00E-04 |

|              |       |           |        |        |          |
|--------------|-------|-----------|--------|--------|----------|
| IVNS1ABP     | 25830 | 2315,247  | 1,5871 | 0,0367 | 6,00E-04 |
| SELS         | 42252 | 2316,3685 | 1,5483 | 0,0367 | 6,00E-04 |
| KLK2         | 26667 | 2320,6623 | 1,5285 | 0,0367 | 6,00E-04 |
| CD86         | 5022  | 2316,9331 | 1,4526 | 0,0367 | 6,00E-04 |
| STRAP        | 44345 | 2322,5791 | 1,5667 | 0,0368 | 6,00E-04 |
| EEF1B2       | 8063  | 2327,3788 | 1,6007 | 0,037  | 6,00E-04 |
| EEF1B2       | 8061  | 2328,1    | 1,5724 | 0,037  | 6,00E-04 |
| S100A8       | 41882 | 2332,2072 | 1,2791 | 0,0372 | 7,00E-04 |
| GPSM1        | 11293 | 2333,8387 | 1,5789 | 0,0373 | 7,00E-04 |
| UTP15        | 47074 | 2336,2076 | 1,5228 | 0,0373 | 7,00E-04 |
| LAT1-3TM     | 27014 | 2343,1073 | 1,5952 | 0,0375 | 7,00E-04 |
| SOCS3        | 43665 | 2345,6243 | 1,5941 | 0,0375 | 7,00E-04 |
| TSPYL2       | 46347 | 2341,5514 | 1,5257 | 0,0375 | 7,00E-04 |
| LY9          | 34375 | 2339,8161 | 1,516  | 0,0375 | 7,00E-04 |
| ATP6V1C1     | 1942  | 2345,9205 | 1,5015 | 0,0375 | 7,00E-04 |
| TMEM93       | 45649 | 2342,5248 | 1,4911 | 0,0375 | 7,00E-04 |
| PHEX         | 38748 | 2342,1342 | 1,4911 | 0,0375 | 7,00E-04 |
| NRIP1        | 36957 | 2344,2165 | 1,4465 | 0,0375 | 7,00E-04 |
| RIF1         | 41217 | 2341,4814 | 1,5785 | 0,0376 | 7,00E-04 |
| LOC648024    | 31452 | 2351,6627 | 1,5199 | 0,0379 | 7,00E-04 |
| MRPL12       | 35615 | 2357,4682 | 1,6015 | 0,0382 | 7,00E-04 |
| SAR1B        | 41956 | 2363,2366 | 1,5669 | 0,0386 | 7,00E-04 |
| TXNL2        | 46597 | 2365,847  | 1,5849 | 0,0387 | 7,00E-04 |
| NME2         | 36687 | 2368,4289 | 1,5817 | 0,0387 | 7,00E-04 |
| ZNF295       | 48212 | 2367,8522 | 1,5786 | 0,0387 | 7,00E-04 |
| UBQLN1       | 46754 | 2367,3257 | 1,5031 | 0,0387 | 7,00E-04 |
| C9ORF80      | 4185  | 2372,1433 | 1,5467 | 0,0388 | 7,00E-04 |
| VPS37A       | 47263 | 2376,2587 | 1,5513 | 0,0389 | 7,00E-04 |
| DDX39        | 7081  | 2374,9152 | 1,5038 | 0,0389 | 7,00E-04 |
| HRK          | 12277 | 2377,1576 | 1,537  | 0,039  | 7,00E-04 |
| HS.565734    | 21899 | 2378,7494 | 1,5307 | 0,039  | 7,00E-04 |
| SNAPC1       | 43479 | 2375,9481 | 1,5224 | 0,039  | 7,00E-04 |
| SETDB2       | 42442 | 2376,2568 | 1,5123 | 0,039  | 7,00E-04 |
| HS.143018    | 13141 | 2381,6188 | 1,5687 | 0,0391 | 7,00E-04 |
| HIVEP3       | 11991 | 2381,9402 | 1,5432 | 0,0391 | 7,00E-04 |
| BRUNOL6      | 2536  | 2384,4734 | 1,5361 | 0,0391 | 7,00E-04 |
| FAHD1        | 8731  | 2384,1019 | 1,5319 | 0,0391 | 7,00E-04 |
| C3ORF37      | 3750  | 2383,6421 | 1,5248 | 0,0391 | 7,00E-04 |
| CD58         | 4990  | 2389,163  | 1,5736 | 0,0394 | 7,00E-04 |
| NDRG1        | 36337 | 2389,4327 | 1,5199 | 0,0394 | 7,00E-04 |
| INTS6        | 25630 | 2390,7755 | 1,5068 | 0,0394 | 7,00E-04 |
| ATF5         | 1777  | 2391,8319 | 1,3075 | 0,0394 | 7,00E-04 |
| PRDM1        | 39735 | 2396,0394 | 1,4704 | 0,0396 | 7,00E-04 |
| CCT3         | 4882  | 2399,2075 | 1,5666 | 0,0398 | 7,00E-04 |
| NOL1         | 36736 | 2400,3751 | 1,563  | 0,0398 | 7,00E-04 |
| RRS1         | 41730 | 2407,6722 | 1,5738 | 0,04   | 7,00E-04 |
| LOC100008589 | 27345 | 2405,4632 | 1,565  | 0,04   | 7,00E-04 |

|           |       |           |        |        |          |
|-----------|-------|-----------|--------|--------|----------|
| GRWD1     | 11433 | 2406,3876 | 1,5142 | 0,04   | 7,00E-04 |
| C20ORF100 | 3469  | 2405,2658 | 1,3796 | 0,04   | 7,00E-04 |
| BOLA2     | 2452  | 2410,7591 | 1,6175 | 0,0401 | 7,00E-04 |
| TWISTNB   | 46562 | 2410,021  | 1,5371 | 0,0401 | 7,00E-04 |
| SFRS7     | 42507 | 2413,081  | 1,6215 | 0,0402 | 7,00E-04 |
| JTV1      | 25884 | 2422,5773 | 1,5711 | 0,0406 | 7,00E-04 |
| CHD1      | 5453  | 2422,0742 | 1,5161 | 0,0406 | 7,00E-04 |
| SNORA10   | 43514 | 2435,6545 | 1,5905 | 0,0411 | 8,00E-04 |
| RPS15     | 41623 | 2429,7142 | 1,5721 | 0,0411 | 8,00E-04 |
| SPRED1    | 43964 | 2433,3178 | 1,5352 | 0,0411 | 8,00E-04 |
| ATPBD1B   | 1977  | 2436,2063 | 1,4654 | 0,0411 | 8,00E-04 |
| CRY1      | 6331  | 2430,6058 | 1,3426 | 0,0411 | 8,00E-04 |
| HAT1      | 11675 | 2435,3748 | 1,5637 | 0,0412 | 8,00E-04 |
| OAS1      | 37195 | 2435,603  | 1,5384 | 0,0412 | 8,00E-04 |
| SEH1L     | 42234 | 2433,0289 | 1,5285 | 0,0412 | 8,00E-04 |
| LOC205251 | 27586 | 2441,139  | 1,5514 | 0,0414 | 8,00E-04 |
| C12ORF5   | 2850  | 2448,0315 | 1,5822 | 0,0418 | 8,00E-04 |
| RGS10     | 41119 | 2447,9439 | 1,4762 | 0,0418 | 8,00E-04 |
| PISD      | 38952 | 2453,8311 | 1,5142 | 0,0419 | 8,00E-04 |
| TMEM93    | 45651 | 2451,8043 | 1,4703 | 0,0419 | 8,00E-04 |
| PSMD14    | 40122 | 2453,7258 | 1,5533 | 0,042  | 8,00E-04 |
| GABARAPL2 | 10413 | 2454,7038 | 1,5231 | 0,042  | 8,00E-04 |
| SLC12A2   | 42794 | 2457,045  | 1,5432 | 0,0421 | 8,00E-04 |
| UBE3A     | 46730 | 2463,3757 | 1,4678 | 0,0424 | 8,00E-04 |
| SLC2A14   | 43033 | 2471,5171 | 1,5205 | 0,0428 | 8,00E-04 |
| CYCS      | 6744  | 2476,3855 | 1,5474 | 0,0431 | 8,00E-04 |
| B3GNT2    | 2073  | 2480,2931 | 1,4795 | 0,0432 | 8,00E-04 |
| TDG       | 44976 | 2481,3842 | 1,5263 | 0,0433 | 8,00E-04 |
| GPATCH4   | 11089 | 2483,2357 | 1,5372 | 0,0434 | 8,00E-04 |
| ISOC2     | 25731 | 2486,5343 | 1,5664 | 0,0435 | 8,00E-04 |
| FUS       | 10316 | 2486,3771 | 1,5302 | 0,0435 | 8,00E-04 |
| HAX1      | 11678 | 2484,6457 | 1,5027 | 0,0435 | 8,00E-04 |
| OPN1LW    | 37315 | 2486,3535 | 1,5732 | 0,0436 | 8,00E-04 |
| PRDM13    | 39740 | 2489,2    | 1,475  | 0,0436 | 8,00E-04 |
| EHD4      | 8149  | 2493,224  | 1,5241 | 0,0439 | 8,00E-04 |
| AP3M2     | 1245  | 2494,6238 | 1,4734 | 0,0439 | 8,00E-04 |
| KIAA0194  | 26178 | 2498,2977 | 1,4686 | 0,0441 | 8,00E-04 |
| SBDSP     | 41977 | 2501,3131 | 1,4666 | 0,0442 | 8,00E-04 |
| FOXP1     | 10167 | 2504,2292 | 1,4911 | 0,0443 | 8,00E-04 |
| EZH2      | 8674  | 2507,6207 | 1,4456 | 0,0445 | 9,00E-04 |
| TGFBR3    | 45122 | 2509,6845 | 1,3474 | 0,0445 | 9,00E-04 |
| HLA-DRB1  | 12022 | 2508,1278 | 1,0655 | 0,0445 | 9,00E-04 |
| CCT2      | 4881  | 2521,4351 | 1,561  | 0,0449 | 9,00E-04 |
| LRRC8B    | 34251 | 2520,2119 | 1,5234 | 0,045  | 9,00E-04 |
| SLC43A3   | 43163 | 2520,8846 | 1,5197 | 0,045  | 9,00E-04 |
| PTMA      | 40230 | 2520,8286 | 1,5169 | 0,045  | 9,00E-04 |
| NDFIP1    | 36331 | 2521,3766 | 1,503  | 0,045  | 9,00E-04 |

|           |       |           |        |        |          |
|-----------|-------|-----------|--------|--------|----------|
| SFRS12    | 42487 | 2518,8207 | 1,5    | 0,045  | 9,00E-04 |
| PRCP      | 39731 | 2526,0296 | 1,496  | 0,045  | 9,00E-04 |
| TXNL1     | 46595 | 2525,5916 | 1,5839 | 0,0451 | 9,00E-04 |
| PRDX4     | 39766 | 2527,0694 | 1,5592 | 0,0451 | 9,00E-04 |
| ZDHC9     | 47905 | 2519,9161 | 1,5552 | 0,0451 | 9,00E-04 |
| ATP1B3    | 1856  | 2528,0894 | 1,5768 | 0,0452 | 9,00E-04 |
| NME1      | 36682 | 2529,7959 | 1,5204 | 0,0452 | 9,00E-04 |
| C20ORF45  | 3535  | 2535,8576 | 1,484  | 0,0456 | 9,00E-04 |
| LOC650803 | 32222 | 2534,8416 | 1,4787 | 0,0456 | 9,00E-04 |
| INSIG1    | 25607 | 2544,3219 | 1,5311 | 0,046  | 9,00E-04 |
| PPM2C     | 39565 | 2543,055  | 1,5273 | 0,046  | 9,00E-04 |
| HS.570700 | 22682 | 2542,0378 | 1,4963 | 0,046  | 9,00E-04 |
| SRGN      | 44055 | 2549,788  | 1,5409 | 0,0463 | 9,00E-04 |
| ARF4      | 1384  | 2554,5403 | 1,4723 | 0,0467 | 9,00E-04 |
| SDSL      | 42179 | 2556,9083 | 1,5754 | 0,0468 | 9,00E-04 |
| RAB8B     | 40542 | 2557,6252 | 1,5059 | 0,0468 | 9,00E-04 |
| HSPC171   | 25040 | 2556,4923 | 1,4573 | 0,0468 | 9,00E-04 |
| LOC649679 | 31902 | 2563,7646 | 1,5078 | 0,0472 | 9,00E-04 |
| NUP98     | 37151 | 2567,5279 | 1,4545 | 0,0473 | 9,00E-04 |
| FAM89A    | 9071  | 2570,3139 | 1,5238 | 0,0475 | 9,00E-04 |
| PLEKHO2   | 39166 | 2572,8385 | 1,494  | 0,0476 | 9,00E-04 |
| HIST1H4K  | 11974 | 2576,473  | 1,5612 | 0,0479 | 9,00E-04 |
| KLHDC4    | 26605 | 2580,2536 | 1,4811 | 0,0482 | 0,001    |
| CYBRD1    | 6742  | 2581,0997 | 1,4752 | 0,0482 | 0,001    |
| OXCT2     | 37916 | 2583,2113 | 1,5245 | 0,0484 | 0,001    |
| SNRPB2    | 43582 | 2586,8176 | 1,5135 | 0,0485 | 0,001    |
| FAM133B   | 8844  | 2593,8359 | 1,5623 | 0,0486 | 0,001    |
| SMARCA5   | 43378 | 2590,0172 | 1,5006 | 0,0486 | 0,001    |
| UBE2L3    | 46701 | 2594,9242 | 1,4667 | 0,0486 | 0,001    |
| NELF      | 36440 | 2590,7396 | 1,4618 | 0,0486 | 0,001    |
| PARVB     | 38147 | 2592,8546 | 1,4491 | 0,0486 | 0,001    |
| WARS2     | 47322 | 2591,446  | 1,3916 | 0,0486 | 0,001    |
| UFM1      | 46811 | 2596,5423 | 1,5186 | 0,0487 | 0,001    |
| WDR33     | 47396 | 2592,66   | 1,5018 | 0,0487 | 0,001    |
| EIF4G1    | 8226  | 2598,8705 | 1,51   | 0,0488 | 0,001    |
| SARS      | 41960 | 2599,4964 | 1,5062 | 0,0488 | 0,001    |
| RBM15     | 40807 | 2601,2131 | 1,4892 | 0,0488 | 0,001    |
| POMC      | 39401 | 2603,2043 | 1,2977 | 0,049  | 0,001    |
| CD48      | 4983  | 2604,9365 | 1,4998 | 0,0491 | 0,001    |
| CD84      | 5019  | 2606,6204 | 1,5347 | 0,0492 | 0,001    |
| MGC72080  | 35274 | 2616,2895 | 1,5198 | 0,0496 | 0,001    |
| GNL1      | 11001 | 2620,1767 | 1,4883 | 0,0498 | 0,001    |
| NIN       | 36581 | 2621,1065 | 1,5502 | 0,0499 | 0,001    |

## RP analysis 3h

## Downregulated

| TargetID | gene.index | RP/Rsum  | FC:(class1/class2) | pfp    | P.value |
|----------|------------|----------|--------------------|--------|---------|
| TXNIP    | 46594      | 40,9925  | 0,2003             | 0,0000 | 0       |
| CD79B    | 5010       | 33,5714  | 0,2035             | 0,0000 | 0       |
| CD79B    | 5012       | 34,1783  | 0,2084             | 0,0000 | 0       |
| CD79B    | 5011       | 35,981   | 0,2091             | 0,0000 | 0       |
| CXCR4    | 6673       | 40,4772  | 0,2237             | 0,0000 | 0       |
| CYBASC3  | 6739       | 70,6472  | 0,2855             | 0,0000 | 0       |
| SEMA4B   | 42266      | 86,022   | 0,2866             | 0,0000 | 0       |
| PRICKLE1 | 39796      | 140,4758 | 0,3054             | 0,0000 | 0       |
| CXCR4    | 6671       | 140,8089 | 0,3094             | 0,0000 | 0       |
| BCL11A   | 2245       | 201,4012 | 0,3216             | 0,0000 | 0       |
| NUAK2    | 37061      | 122,4769 | 0,3267             | 0,0000 | 0       |
| FLOT2    | 10035      | 134,1675 | 0,3276             | 0,0000 | 0       |
| CTDSP2   | 6524       | 142,9422 | 0,3315             | 0,0000 | 0       |
| C6ORF32  | 3955       | 199,4907 | 0,3485             | 0,0000 | 0       |
| PIM2     | 38923      | 205,3361 | 0,3513             | 0,0000 | 0       |
| LYL1     | 34386      | 227,1297 | 0,3568             | 0,0000 | 0       |
| C13ORF18 | 2872       | 260,7566 | 0,3656             | 0,0000 | 0       |
| KIAA0430 | 26218      | 236,6312 | 0,3684             | 0,0000 | 0       |
| PDE7A    | 38481      | 220,898  | 0,3685             | 0,0000 | 0       |
| UCP2     | 46798      | 295,7427 | 0,3738             | 0,0000 | 0       |
| NUB1     | 37063      | 204,5154 | 0,374              | 0,0000 | 0       |
| NUAK2    | 37060      | 197,2479 | 0,3744             | 0,0000 | 0       |
| P2RY8    | 37964      | 225,8174 | 0,3747             | 0,0000 | 0       |
| PRPSAP1  | 39950      | 250,7005 | 0,3763             | 0,0000 | 0       |
| CDKN1B   | 5198       | 250,6623 | 0,3782             | 0,0000 | 0       |
| HSH2D    | 24989      | 254,9401 | 0,3809             | 0,0000 | 0       |
| BMF      | 2394       | 303,8056 | 0,3872             | 0,0000 | 0       |
| ARL6IP5  | 1545       | 316,6044 | 0,3896             | 0,0000 | 0       |
| FGD3     | 9399       | 321,1481 | 0,3936             | 0,0000 | 0       |
| MKNK2    | 35359      | 336,2406 | 0,3958             | 0,0000 | 0       |
| BMF      | 2391       | 346,4796 | 0,3969             | 0,0000 | 0       |
| C13ORF18 | 2873       | 368,7064 | 0,3972             | 0,0000 | 0       |
| ETS1     | 8576       | 310,2842 | 0,3979             | 0,0000 | 0       |
| TRAF3IP3 | 45981      | 278,8346 | 0,4013             | 0,0000 | 0       |
| MGC3207  | 35192      | 306,0392 | 0,4034             | 0,0000 | 0       |
| SASH3    | 41966      | 422,6777 | 0,4039             | 0,0000 | 0       |
| PTPRCAP  | 40300      | 357,6091 | 0,4074             | 0,0000 | 0       |
| FAM65A   | 9007       | 388,7241 | 0,4077             | 0,0000 | 0       |
| PDE4B    | 38457      | 361,4249 | 0,4099             | 0,0000 | 0       |
| IFFO     | 25200      | 312,4724 | 0,4099             | 0,0000 | 0       |
| SYVN1    | 44597      | 306,8149 | 0,4106             | 0,0000 | 0       |

|            |       |          |        |        |   |
|------------|-------|----------|--------|--------|---|
| TEAD2      | 44999 | 383,5441 | 0,4107 | 0,0000 | 0 |
| GGA2       | 10740 | 430,585  | 0,4125 | 0,0000 | 0 |
| C5ORF29    | 3841  | 420,8685 | 0,4168 | 0,0000 | 0 |
| TLR10      | 45315 | 393,7453 | 0,4185 | 0,0000 | 0 |
| SAMD9L     | 41934 | 357,4698 | 0,419  | 0,0000 | 0 |
| ST6GALNAC4 | 44181 | 382,2626 | 0,4207 | 0,0000 | 0 |
| PEX11B     | 38619 | 329,1028 | 0,4215 | 0,0000 | 0 |
| PIK3IP1    | 38902 | 443,8191 | 0,4239 | 0,0000 | 0 |
| MGC3207    | 35189 | 359,0172 | 0,4254 | 0,0000 | 0 |
| SH2D3C     | 42574 | 385,0374 | 0,4281 | 0,0000 | 0 |
| NAPSB      | 36185 | 384,1975 | 0,4285 | 0,0000 | 0 |
| C20ORF177  | 3507  | 353,5925 | 0,4291 | 0,0000 | 0 |
| PSCD1      | 40022 | 443,2872 | 0,4321 | 0,0000 | 0 |
| NCF1       | 36291 | 397,784  | 0,4369 | 0,0000 | 0 |
| NKTR       | 36621 | 401,5351 | 0,4391 | 0,0000 | 0 |
| ATG4C      | 1798  | 430,0478 | 0,4414 | 0,0000 | 0 |
| ILK        | 25524 | 447,0267 | 0,4421 | 0,0000 | 0 |
| KLHL14     | 26622 | 425,4808 | 0,4427 | 0,0000 | 0 |
| CDC40      | 5085  | 445,8812 | 0,4444 | 0,0000 | 0 |
| TUSC4      | 46552 | 439,2738 | 0,4541 | 0,0000 | 0 |
| FLJ39827   | 9841  | 454,6553 | 0,4574 | 0,0000 | 0 |
| VAMP1      | 47104 | 450,9351 | 0,4611 | 0,0000 | 0 |
| THYN1      | 45220 | 464,4875 | 0,4626 | 0,0000 | 0 |
| MOBK12A    | 35484 | 483,8783 | 0,4353 | 0,0001 | 0 |
| ADAM28     | 420   | 482,1463 | 0,4365 | 0,0001 | 0 |
| TNK2       | 45786 | 474,0261 | 0,4614 | 0,0001 | 0 |
| FGD2       | 9398  | 472,7379 | 0,4515 | 0,0002 | 0 |
| GRAP       | 11318 | 503,1153 | 0,4256 | 0,0003 | 0 |
| APOL3      | 1327  | 510,132  | 0,4358 | 0,0003 | 0 |
| PSCD4      | 40027 | 509,3241 | 0,4432 | 0,0003 | 0 |
| SYK        | 44515 | 516,0588 | 0,4488 | 0,0003 | 0 |
| NAPSB      | 36186 | 513,837  | 0,4561 | 0,0003 | 0 |
| TUBB       | 46511 | 506,9499 | 0,4571 | 0,0003 | 0 |
| THYN1      | 45222 | 507,9469 | 0,4723 | 0,0003 | 0 |
| C1ORF162   | 3320  | 518,9224 | 0,4602 | 0,0004 | 0 |
| ST6GALNAC4 | 44183 | 538,8458 | 0,4643 | 0,0004 | 0 |
| C10ORF73   | 2720  | 536,2681 | 0,4651 | 0,0004 | 0 |
| SELL       | 42245 | 539,3715 | 0,4427 | 0,0005 | 0 |
| HS.356079  | 15128 | 541,394  | 0,4499 | 0,0005 | 0 |
| PARP4      | 38134 | 539,7643 | 0,4507 | 0,0005 | 0 |
| ST3GAL5    | 44166 | 543,2083 | 0,4543 | 0,0005 | 0 |
| BCL11A     | 2246  | 551,3788 | 0,4594 | 0,0005 | 0 |
| FOXJ2      | 10139 | 549,8991 | 0,4647 | 0,0005 | 0 |
| E2F5       | 7969  | 557,1686 | 0,4693 | 0,0005 | 0 |
| GNAI2      | 10959 | 547,4727 | 0,473  | 0,0005 | 0 |
| PHACTR4    | 38736 | 542,7028 | 0,474  | 0,0005 | 0 |
| TNFSF10    | 45760 | 564,8955 | 0,4641 | 0,0007 | 0 |

|           |       |          |        |        |   |
|-----------|-------|----------|--------|--------|---|
| TRIM8     | 46164 | 573,2504 | 0,4716 | 0,0007 | 0 |
| RASSF7    | 40764 | 566,4387 | 0,4719 | 0,0007 | 0 |
| FLJ40142  | 9848  | 571,1055 | 0,477  | 0,0007 | 0 |
| VPREB3    | 47227 | 598,2797 | 0,4298 | 0,0009 | 0 |
| ZNF439    | 48340 | 590,0073 | 0,4573 | 0,0009 | 0 |
| DCK       | 6963  | 592,4852 | 0,4673 | 0,0009 | 0 |
| SKP2      | 42761 | 601,2554 | 0,487  | 0,0009 | 0 |
| TRABD     | 45968 | 605,9047 | 0,4606 | 0,001  | 0 |
| CLSTN1    | 5793  | 622,8753 | 0,4874 | 0,001  | 0 |
| SPOCK2    | 43947 | 616,0713 | 0,449  | 0,0011 | 0 |
| CD79A     | 5007  | 620,1001 | 0,4679 | 0,0011 | 0 |
| RAB40C    | 40520 | 609,7792 | 0,4719 | 0,0011 | 0 |
| CD37      | 4963  | 613,6008 | 0,4729 | 0,0011 | 0 |
| EDG1      | 8036  | 610,1096 | 0,4764 | 0,0011 | 0 |
| SLC46A3   | 43184 | 616,1654 | 0,4814 | 0,0011 | 0 |
| SLC37A4   | 43112 | 617,7345 | 0,4848 | 0,0011 | 0 |
| TLR7      | 45323 | 648,5847 | 0,4506 | 0,0012 | 0 |
| USF1      | 46972 | 648,0004 | 0,4769 | 0,0012 | 0 |
| UNC93B1   | 46909 | 648,8435 | 0,4773 | 0,0012 | 0 |
| LOC339344 | 27846 | 647,3267 | 0,4834 | 0,0012 | 0 |
| CCDC115   | 4592  | 654,0241 | 0,4935 | 0,0012 | 0 |
| LTB       | 34325 | 688,6305 | 0,4489 | 0,0013 | 0 |
| HS.185764 | 13839 | 635,1208 | 0,4673 | 0,0013 | 0 |
| BCL3      | 2271  | 687,6278 | 0,4796 | 0,0013 | 0 |
| CSK       | 6402  | 638,2692 | 0,4832 | 0,0013 | 0 |
| YPEL2     | 47732 | 643,6461 | 0,4849 | 0,0013 | 0 |
| CD37      | 4964  | 635,0248 | 0,4858 | 0,0013 | 0 |
| C4ORF34   | 3813  | 657,0381 | 0,4868 | 0,0013 | 0 |
| SLC25A28  | 42946 | 645,61   | 0,487  | 0,0013 | 0 |
| CCM2      | 4795  | 686,3496 | 0,4914 | 0,0013 | 0 |
| TTC13     | 46374 | 637,654  | 0,4924 | 0,0013 | 0 |
| GORASP1   | 11063 | 690,3847 | 0,4989 | 0,0013 | 0 |
| LOC652493 | 32727 | 701,3805 | 0,6466 | 0,0013 | 0 |
| EVI2B     | 8598  | 696,4242 | 0,4709 | 0,0014 | 0 |
| LOC90925  | 34054 | 694,4212 | 0,4746 | 0,0014 | 0 |
| ALDH5A1   | 843   | 671,2452 | 0,4815 | 0,0014 | 0 |
| ALOX5AP   | 907   | 681,2858 | 0,4817 | 0,0014 | 0 |
| PDLIM1    | 38527 | 673,7568 | 0,4835 | 0,0014 | 0 |
| GIT2      | 10807 | 676,3092 | 0,4838 | 0,0014 | 0 |
| ZYG11B    | 48798 | 698,4122 | 0,4894 | 0,0014 | 0 |
| IL10RA    | 25361 | 679,1399 | 0,4906 | 0,0014 | 0 |
| LOC649923 | 31961 | 667,3545 | 0,5063 | 0,0014 | 0 |
| IRF5      | 25691 | 696,1561 | 0,5066 | 0,0014 | 0 |
| ZMYND8    | 48031 | 669,4294 | 0,5079 | 0,0014 | 0 |
| IGLL1     | 25311 | 672,5402 | 0,6468 | 0,0014 | 0 |
| STAT2     | 44255 | 722,0587 | 0,4943 | 0,0017 | 0 |
| GCHFR     | 10636 | 720,4361 | 0,4944 | 0,0017 | 0 |



|           |       |          |        |        |   |
|-----------|-------|----------|--------|--------|---|
| UBAC1     | 46637 | 714,6729 | 0,4959 | 0,0017 | 0 |
| MCM7      | 34905 | 714,7832 | 0,5004 | 0,0017 | 0 |
| THAP11    | 45154 | 720,9945 | 0,5114 | 0,0017 | 0 |
| ARHGEF3   | 1476  | 748,27   | 0,484  | 0,0019 | 0 |
| ARHGDIB   | 1456  | 767,9257 | 0,4863 | 0,0019 | 0 |
| TLR10     | 45314 | 730,4858 | 0,4916 | 0,0019 | 0 |
| PYCARD    | 40398 | 748,58   | 0,5003 | 0,0019 | 0 |
| TIAF1     | 45226 | 757,0688 | 0,5016 | 0,0019 | 0 |
| LOC728499 | 33672 | 743,2838 | 0,5057 | 0,0019 | 0 |
| RALGPS1   | 40636 | 736,904  | 0,5073 | 0,0019 | 0 |
| ANKZF1    | 1158  | 745,1932 | 0,5077 | 0,0019 | 0 |
| HS.282467 | 14660 | 758,0396 | 0,5085 | 0,0019 | 0 |
| FAM96A    | 9096  | 735,0778 | 0,5089 | 0,0019 | 0 |
| EPN1      | 8439  | 747,3078 | 0,5095 | 0,0019 | 0 |
| C17ORF44  | 3097  | 731,8013 | 0,5135 | 0,0019 | 0 |
| DNASE2    | 7621  | 767,2552 | 0,519  | 0,0019 | 0 |
| ULK1      | 46869 | 790,1056 | 0,4949 | 0,002  | 0 |
| RHBDF2    | 41165 | 788,5231 | 0,5147 | 0,002  | 0 |
| PIK3CD    | 38900 | 777,8582 | 0,5152 | 0,002  | 0 |
| LRCH4     | 34137 | 791,4303 | 0,5266 | 0,002  | 0 |
| SIPA1     | 42716 | 784,1896 | 0,4789 | 0,0021 | 0 |
| C6ORF105  | 3868  | 819,6706 | 0,4811 | 0,0021 | 0 |
| CD5       | 4984  | 809,2002 | 0,4875 | 0,0021 | 0 |
| PDE4B     | 38456 | 824,584  | 0,502  | 0,0021 | 0 |
| ZNF821    | 48700 | 783,7627 | 0,5027 | 0,0021 | 0 |
| MXD4      | 35963 | 825,5956 | 0,505  | 0,0021 | 0 |
| REPIN1    | 40993 | 798,9017 | 0,5055 | 0,0021 | 0 |
| BLK       | 2378  | 820,0127 | 0,5061 | 0,0021 | 0 |
| TNFRSF17  | 45740 | 801,9222 | 0,5065 | 0,0021 | 0 |
| PHF15     | 38764 | 825,9164 | 0,5091 | 0,0021 | 0 |
| WAS       | 47323 | 804,8853 | 0,5105 | 0,0021 | 0 |
| MANBA     | 34585 | 820,2893 | 0,5111 | 0,0021 | 0 |
| NCF1C     | 36293 | 797,5154 | 0,5117 | 0,0021 | 0 |
| DIS3L     | 7371  | 784,9249 | 0,5128 | 0,0021 | 0 |
| ZDHHC8    | 47904 | 805,8297 | 0,5167 | 0,0021 | 0 |
| MAP3K4    | 34647 | 806,3828 | 0,5172 | 0,0021 | 0 |
| CARM1     | 4431  | 826,6574 | 0,5254 | 0,0021 | 0 |
| TBC1D13   | 44764 | 806,7588 | 0,5278 | 0,0021 | 0 |
| C9ORF45   | 4156  | 829,1548 | 0,5124 | 0,0022 | 0 |
| MAPBPIP   | 34682 | 833,113  | 0,5242 | 0,0022 | 0 |
| PLEKHA2   | 39127 | 850,5336 | 0,4977 | 0,0023 | 0 |
| SLC7A7    | 43268 | 850,4589 | 0,5005 | 0,0023 | 0 |
| MKNK2     | 35360 | 844,844  | 0,5043 | 0,0023 | 0 |
| TSPAN33   | 46326 | 858,2551 | 0,5053 | 0,0023 | 0 |
| REEP5     | 40966 | 856,7584 | 0,5057 | 0,0023 | 0 |
| CTPS2     | 6573  | 861,1779 | 0,5127 | 0,0023 | 0 |
| PSMB9     | 40095 | 848,1869 | 0,5142 | 0,0023 | 0 |

|           |       |          |        |        |   |
|-----------|-------|----------|--------|--------|---|
| ORAI2     | 37800 | 879,9225 | 0,5159 | 0,0023 | 0 |
| RHBDF2    | 41167 | 864,9344 | 0,518  | 0,0023 | 0 |
| ZNF337    | 48259 | 836,1666 | 0,5193 | 0,0023 | 0 |
| ECH1      | 8003  | 862,4816 | 0,5205 | 0,0023 | 0 |
| FAM39E    | 8945  | 867,4901 | 0,5226 | 0,0023 | 0 |
| LOC647000 | 31120 | 835,049  | 0,5246 | 0,0023 | 0 |
| C1ORF2    | 3352  | 850,5355 | 0,5257 | 0,0023 | 0 |
| ECOP      | 8013  | 883,8214 | 0,5263 | 0,0023 | 0 |
| MICB      | 35312 | 839,6682 | 0,5289 | 0,0023 | 0 |
| AP2S1     | 1236  | 869,1753 | 0,5324 | 0,0023 | 0 |
| FCRLB     | 9347  | 849,2285 | 0,5327 | 0,0023 | 0 |
| BTN2A1    | 2593  | 836,8201 | 0,5349 | 0,0023 | 0 |
| LOC647450 | 31278 | 865,9157 | 0,6877 | 0,0023 | 0 |
| RERE      | 41002 | 893,3079 | 0,5109 | 0,0024 | 0 |
| RAB24     | 40477 | 877,3966 | 0,5138 | 0,0024 | 0 |
| ERCC5     | 8493  | 846,4568 | 0,5208 | 0,0024 | 0 |
| DYRK2     | 7948  | 894,9029 | 0,5236 | 0,0024 | 0 |
| NOD2      | 36730 | 883,8033 | 0,5237 | 0,0024 | 0 |
| ALDH3A2   | 831   | 874,2674 | 0,5237 | 0,0024 | 0 |
| SNX27     | 43637 | 883,4933 | 0,5263 | 0,0024 | 0 |
| C1ORF63   | 3397  | 891,5236 | 0,5288 | 0,0024 | 0 |
| ACAD8     | 214   | 874,5263 | 0,5299 | 0,0024 | 0 |
| PRDM2     | 39749 | 884,6407 | 0,5301 | 0,0024 | 0 |
| CRIPAK    | 6282  | 871,774  | 0,5322 | 0,0024 | 0 |
| HPS3      | 12241 | 880,758  | 0,5346 | 0,0024 | 0 |
| GBP4      | 10613 | 882,6905 | 0,5508 | 0,0024 | 0 |
| YPEL3     | 47733 | 907,814  | 0,5061 | 0,0025 | 0 |
| SSH2      | 44108 | 907,3672 | 0,5074 | 0,0025 | 0 |
| BCL11A    | 2244  | 905,2398 | 0,5144 | 0,0025 | 0 |
| CD19      | 4911  | 905,1079 | 0,5172 | 0,0025 | 0 |
| NBPF11    | 36241 | 904,9074 | 0,5246 | 0,0025 | 0 |
| DFFB      | 7219  | 903,9099 | 0,5354 | 0,0025 | 0 |
| MTMR4     | 35877 | 905,5851 | 0,5367 | 0,0025 | 0 |
| RTP4      | 41798 | 892,0024 | 0,5408 | 0,0025 | 0 |
| TNIP1     | 45782 | 914,3877 | 0,542  | 0,0025 | 0 |
| LRIG1     | 34148 | 914,9851 | 0,5131 | 0,0026 | 0 |
| FCRLA     | 9346  | 908,4717 | 0,5306 | 0,0026 | 0 |
| POLR3GL   | 39393 | 917,0905 | 0,5327 | 0,0026 | 0 |
| IRF9      | 25699 | 902,3406 | 0,5415 | 0,0026 | 0 |
| MPPE1     | 35558 | 948,5522 | 0,5164 | 0,0027 | 0 |
| STX7      | 44381 | 945,407  | 0,5231 | 0,0027 | 0 |
| SHISA5    | 42649 | 929,0579 | 0,5248 | 0,0027 | 0 |
| TRIM22    | 46070 | 930,3252 | 0,5267 | 0,0027 | 0 |
| ZFP106    | 47928 | 930,3152 | 0,5275 | 0,0027 | 0 |
| LOC651309 | 32358 | 931,4736 | 0,5278 | 0,0027 | 0 |
| SIN3A     | 42711 | 930,4172 | 0,5295 | 0,0027 | 0 |
| CYFIP2    | 6752  | 949,9597 | 0,5299 | 0,0027 | 0 |

|           |       |           |        |        |   |
|-----------|-------|-----------|--------|--------|---|
| C14ORF139 | 2926  | 949,499   | 0,5322 | 0,0027 | 0 |
| ARL2      | 1519  | 934,9915  | 0,5349 | 0,0027 | 0 |
| LBA1      | 27023 | 935,7255  | 0,5363 | 0,0027 | 0 |
| CASP2     | 4457  | 935,1394  | 0,5375 | 0,0027 | 0 |
| SAMD9     | 41933 | 950,1984  | 0,5427 | 0,0027 | 0 |
| FO XK1    | 10142 | 953,5872  | 0,5424 | 0,0028 | 0 |
| ZMAT3     | 48001 | 957,8607  | 0,5435 | 0,0029 | 0 |
| HS.556082 | 20461 | 970,4435  | 0,5399 | 0,003  | 0 |
| LOC374395 | 27945 | 972,0608  | 0,5437 | 0,003  | 0 |
| RHOT1     | 41198 | 980,6813  | 0,5413 | 0,0031 | 0 |
| FCRL2     | 9337  | 975,4914  | 0,5456 | 0,0031 | 0 |
| STARD7    | 44247 | 984,1898  | 0,5528 | 0,0033 | 0 |
| KIAA1370  | 26344 | 999,089   | 0,5016 | 0,0035 | 0 |
| DGKA      | 7241  | 1012,6092 | 0,5209 | 0,0035 | 0 |
| ARHGEF18  | 1473  | 990,3034  | 0,5258 | 0,0035 | 0 |
| GRINA     | 11380 | 1010,0032 | 0,5278 | 0,0035 | 0 |
| HDAC1     | 11730 | 1003,0677 | 0,5302 | 0,0035 | 0 |
| TMEM109   | 45414 | 999,6534  | 0,5353 | 0,0035 | 0 |
| ADD1      | 511   | 1011,3805 | 0,539  | 0,0035 | 0 |
| PSD4      | 40036 | 1012,637  | 0,5403 | 0,0035 | 0 |
| ACSS1     | 335   | 996,892   | 0,5464 | 0,0035 | 0 |
| HS.354359 | 15116 | 1015,3184 | 0,5473 | 0,0035 | 0 |
| SMARCAL1  | 43381 | 989,5276  | 0,5478 | 0,0035 | 0 |
| IL10RB    | 25362 | 1010,1712 | 0,5489 | 0,0035 | 0 |
| ZNF791    | 48686 | 999,0326  | 0,5492 | 0,0035 | 0 |
| SKP2      | 42762 | 991,9458  | 0,5516 | 0,0035 | 0 |
| DGKA      | 7239  | 1019,5249 | 0,5194 | 0,0036 | 0 |
| GRINA     | 11379 | 1020,957  | 0,5316 | 0,0036 | 0 |
| UROS      | 46969 | 1021,6152 | 0,5425 | 0,0036 | 0 |
| MRPL34    | 35646 | 1025,1221 | 0,5463 | 0,0036 | 0 |
| NKTR      | 36620 | 1034,5564 | 0,5468 | 0,0036 | 0 |
| SLC15A4   | 42819 | 1025,2615 | 0,5518 | 0,0036 | 0 |
| C6ORF192  | 3932  | 1033,9456 | 0,5195 | 0,0037 | 0 |
| LPAR5     | 34107 | 1035,7125 | 0,5253 | 0,0037 | 0 |
| ULK1      | 46870 | 1047,8488 | 0,5297 | 0,0037 | 0 |
| IL10RB    | 25363 | 1031,6647 | 0,5327 | 0,0037 | 0 |
| EHD1      | 8146  | 1032,7977 | 0,5334 | 0,0037 | 0 |
| BIN1      | 2358  | 1036,6794 | 0,5352 | 0,0037 | 0 |
| CXXC1     | 6717  | 1040,9914 | 0,5407 | 0,0037 | 0 |
| NUCB1     | 37067 | 1031,3366 | 0,5407 | 0,0037 | 0 |
| HLA-DOB   | 12011 | 1036,9194 | 0,5438 | 0,0037 | 0 |
| SP110     | 43756 | 1027,8906 | 0,5467 | 0,0037 | 0 |
| NIF3L1    | 36580 | 1038,2551 | 0,5496 | 0,0037 | 0 |
| TMEM101   | 45401 | 1034,0005 | 0,5573 | 0,0037 | 0 |
| GRN       | 11420 | 1056,6357 | 0,5379 | 0,0038 | 0 |
| RBBP9     | 40786 | 1052,9116 | 0,5523 | 0,0038 | 0 |
| TPRG1L    | 45943 | 1051,8704 | 0,5614 | 0,0038 | 0 |

|              |       |           |        |        |   |
|--------------|-------|-----------|--------|--------|---|
| GTF2IP1      | 11520 | 1059,6027 | 0,558  | 0,0039 | 0 |
| TCF3         | 44924 | 1064,178  | 0,5481 | 0,004  | 0 |
| BCKDHA       | 2235  | 1072,1538 | 0,5453 | 0,0041 | 0 |
| ZFP36L2      | 47938 | 1071,783  | 0,5465 | 0,0041 | 0 |
| ALOX5        | 904   | 1069,4327 | 0,5473 | 0,0041 | 0 |
| HS.91389     | 24831 | 1082,0606 | 0,5538 | 0,0042 | 0 |
| TMEM79       | 45629 | 1081,417  | 0,558  | 0,0042 | 0 |
| IL7          | 25507 | 1089,2178 | 0,5632 | 0,0043 | 0 |
| MCM5         | 34902 | 1097,759  | 0,5441 | 0,0044 | 0 |
| C5ORF39      | 3853  | 1096,9688 | 0,5466 | 0,0044 | 0 |
| SLC12A9      | 42804 | 1093,443  | 0,5551 | 0,0044 | 0 |
| SLC16A5      | 42834 | 1095,2528 | 0,5675 | 0,0044 | 0 |
| FCRL3        | 9340  | 1090,3293 | 0,5974 | 0,0044 | 0 |
| COASY        | 5946  | 1102,5926 | 0,5561 | 0,0045 | 0 |
| PRIM1        | 39800 | 1094,5203 | 0,5662 | 0,0045 | 0 |
| ST6GALNAC6   | 44185 | 1107,0659 | 0,5434 | 0,0046 | 0 |
| P2RY10       | 37945 | 1107,8263 | 0,5597 | 0,0046 | 0 |
| UGP2         | 46824 | 1117,0852 | 0,5601 | 0,0049 | 0 |
| NDE1         | 36328 | 1119,189  | 0,5535 | 0,005  | 0 |
| TAPBP        | 44703 | 1118,0489 | 0,5604 | 0,005  | 0 |
| HS.18081     | 13815 | 1116,9666 | 0,5612 | 0,005  | 0 |
| ALS2CR13     | 922   | 1123,272  | 0,5114 | 0,0051 | 0 |
| GALNAC4S-6ST | 10505 | 1122,799  | 0,534  | 0,0051 | 0 |
| NPHP3        | 36842 | 1134,8145 | 0,5434 | 0,0051 | 0 |
| ABLIM1       | 190   | 1122,2652 | 0,5472 | 0,0051 | 0 |
| MAPK8IP3     | 34716 | 1131,9844 | 0,5531 | 0,0051 | 0 |
| C17ORF59     | 3117  | 1125,5636 | 0,5746 | 0,0051 | 0 |
| DGCR2        | 7231  | 1140,5813 | 0,5497 | 0,0052 | 0 |
| NEDD8        | 36408 | 1137,9101 | 0,5645 | 0,0052 | 0 |
| FAM39DP      | 8943  | 1151,0774 | 0,5465 | 0,0054 | 0 |
| TNFRSF13B    | 45737 | 1150,4542 | 0,6737 | 0,0054 | 0 |
| ETV6         | 8587  | 1158,4224 | 0,5601 | 0,0055 | 0 |
| CHRNA1       | 5557  | 1157,5071 | 0,5674 | 0,0055 | 0 |
| PIK3R2       | 38908 | 1161,0575 | 0,579  | 0,0055 | 0 |
| SCRN1        | 42100 | 1167,3999 | 0,5505 | 0,0056 | 0 |
| CDKN1B       | 5199  | 1174,2705 | 0,5212 | 0,0057 | 0 |
| SHPK         | 42662 | 1174,0526 | 0,5608 | 0,0057 | 0 |
| POLM         | 39348 | 1174,3237 | 0,5657 | 0,0057 | 0 |
| ZFP161       | 47931 | 1186,9767 | 0,5548 | 0,0058 | 0 |
| KIAA0922     | 26279 | 1183,204  | 0,5577 | 0,0058 | 0 |
| DGCR6        | 7233  | 1186,3563 | 0,5584 | 0,0058 | 0 |
| EIF2AK1      | 8173  | 1180,9981 | 0,5774 | 0,0058 | 0 |
| VASH1        | 47124 | 1192,9116 | 0,6689 | 0,0059 | 0 |
| HNRPUL1      | 12145 | 1192,4172 | 0,5472 | 0,006  | 0 |
| ANKRA2       | 1055  | 1191,5665 | 0,5541 | 0,006  | 0 |
| XAF1         | 47619 | 1194,5063 | 0,5657 | 0,006  | 0 |
| BNIP3L       | 2440  | 1202,3107 | 0,5435 | 0,0061 | 0 |

|           |       |           |        |        |          |
|-----------|-------|-----------|--------|--------|----------|
| UNC84B    | 46906 | 1204,1056 | 0,5527 | 0,0061 | 0        |
| PYHIN1    | 40412 | 1199,5139 | 0,555  | 0,0061 | 0        |
| C7ORF27   | 4002  | 1213,1462 | 0,5578 | 0,0061 | 0        |
| GNG7      | 10997 | 1213,8507 | 0,5679 | 0,0061 | 0        |
| SMARCC2   | 43386 | 1211,676  | 0,5778 | 0,0061 | 0        |
| INPP5D    | 25597 | 1206,4998 | 0,5416 | 0,0062 | 0        |
| BBS2      | 2189  | 1211,2574 | 0,5492 | 0,0062 | 0        |
| C20ORF72  | 3552  | 1216,3227 | 0,5615 | 0,0062 | 0        |
| RNF144B   | 41335 | 1209,7693 | 0,5616 | 0,0062 | 0        |
| CTSH      | 6596  | 1210,7147 | 0,5634 | 0,0062 | 0        |
| SNX3      | 43639 | 1219,9941 | 0,5732 | 0,0062 | 0        |
| IL16      | 25385 | 1221,095  | 0,5357 | 0,0063 | 0        |
| LAPTM5    | 26982 | 1228,8989 | 0,5405 | 0,0065 | 0        |
| PVRIG     | 40364 | 1229,6153 | 0,548  | 0,0065 | 0        |
| ARL17P1   | 1518  | 1228,8857 | 0,5556 | 0,0065 | 0        |
| GOLPH3L   | 11054 | 1231,2109 | 0,5636 | 0,0065 | 0        |
| BTN3A2    | 2600  | 1228,6563 | 0,5798 | 0,0065 | 0        |
| WDR54     | 47439 | 1238,6469 | 0,5621 | 0,0066 | 0        |
| IDH1      | 25180 | 1248,6903 | 0,5666 | 0,0067 | 0        |
| TNFSF12   | 45764 | 1248,3538 | 0,5673 | 0,0067 | 0        |
| LOC388969 | 28091 | 1251,0602 | 0,5735 | 0,0067 | 0        |
| TGFBI     | 45117 | 1256,0533 | 0,5484 | 0,0068 | 0        |
| C20ORF117 | 3481  | 1252,9377 | 0,5656 | 0,0068 | 0        |
| VPS45     | 47273 | 1251,8915 | 0,5799 | 0,0068 | 0        |
| BCL11A    | 2243  | 1258,7846 | 0,5472 | 0,0069 | 0        |
| PPM1F     | 39556 | 1255,3611 | 0,5645 | 0,0069 | 0        |
| ITGAE     | 25758 | 1255,6806 | 0,5691 | 0,0069 | 0        |
| B3GALT4   | 2062  | 1260,719  | 0,5743 | 0,0069 | 1,00E-04 |
| CCDC28A   | 4649  | 1271,0707 | 0,572  | 0,007  | 1,00E-04 |
| FLJ12949  | 9588  | 1269,7611 | 0,575  | 0,007  | 1,00E-04 |
| STAT1     | 44253 | 1275,4089 | 0,5571 | 0,0071 | 1,00E-04 |
| PITPNM1   | 38957 | 1274,4435 | 0,5598 | 0,0071 | 1,00E-04 |
| PLCG2     | 39093 | 1278,9605 | 0,5362 | 0,0072 | 1,00E-04 |
| ALDH9A1   | 851   | 1281,4423 | 0,5742 | 0,0072 | 1,00E-04 |
| IL16      | 25384 | 1277,2418 | 0,5799 | 0,0072 | 1,00E-04 |
| RNF135    | 41324 | 1285,1961 | 0,5599 | 0,0074 | 1,00E-04 |
| ALKBH5    | 885   | 1285,3073 | 0,5648 | 0,0074 | 1,00E-04 |
| MEN1      | 35028 | 1289,4858 | 0,5733 | 0,0075 | 1,00E-04 |
| HS.436134 | 15728 | 1293,0661 | 0,5697 | 0,0077 | 1,00E-04 |
| SDHA      | 42150 | 1300,0628 | 0,573  | 0,0078 | 1,00E-04 |
| SLFN11    | 43319 | 1298,5122 | 0,581  | 0,0078 | 1,00E-04 |
| USP24     | 47014 | 1301,574  | 0,5597 | 0,0079 | 1,00E-04 |
| PLSCR3    | 39202 | 1308,6625 | 0,5609 | 0,0079 | 1,00E-04 |
| ZNF828    | 48704 | 1310,6205 | 0,5632 | 0,0079 | 1,00E-04 |
| LYN       | 34387 | 1308,63   | 0,5569 | 0,008  | 1,00E-04 |
| EDG6      | 8040  | 1306,1898 | 0,5584 | 0,008  | 1,00E-04 |
| LTA4H     | 34324 | 1307,9911 | 0,5621 | 0,008  | 1,00E-04 |

|           |       |           |        |        |          |
|-----------|-------|-----------|--------|--------|----------|
| ZNF133    | 48048 | 1306,0074 | 0,5723 | 0,008  | 1,00E-04 |
| RCS1      | 40933 | 1306,5224 | 0,5749 | 0,008  | 1,00E-04 |
| MAP4K2    | 34666 | 1314,9901 | 0,5635 | 0,0081 | 1,00E-04 |
| ZC3H7A    | 47843 | 1321,8818 | 0,5719 | 0,0081 | 1,00E-04 |
| BRD3      | 2490  | 1316,9388 | 0,577  | 0,0081 | 1,00E-04 |
| RHOT1     | 41199 | 1323,4022 | 0,5769 | 0,0082 | 1,00E-04 |
| FRAT2     | 10199 | 1329,8121 | 0,5798 | 0,0082 | 1,00E-04 |
| TRAK1     | 45997 | 1323,1776 | 0,5864 | 0,0082 | 1,00E-04 |
| PLEKHG1   | 39144 | 1334,88   | 0,5636 | 0,0084 | 1,00E-04 |
| TDRD7     | 44993 | 1336,075  | 0,5943 | 0,0084 | 1,00E-04 |
| ARRDC2    | 1613  | 1340,6923 | 0,5648 | 0,0085 | 1,00E-04 |
| NAPSA     | 36184 | 1343,6166 | 0,5665 | 0,0085 | 1,00E-04 |
| CORO1B    | 6103  | 1339,1548 | 0,5695 | 0,0085 | 1,00E-04 |
| RAB11FIP1 | 40451 | 1341,3597 | 0,5752 | 0,0085 | 1,00E-04 |
| HHEX      | 11855 | 1339,8969 | 0,5785 | 0,0085 | 1,00E-04 |
| RCOR3     | 40929 | 1367,4327 | 0,5626 | 0,0089 | 1,00E-04 |
| C5ORF25   | 3837  | 1355,767  | 0,5665 | 0,0089 | 1,00E-04 |
| BRWD2     | 2542  | 1354,9481 | 0,568  | 0,0089 | 1,00E-04 |
| CYSLTR1   | 6860  | 1363,7173 | 0,5701 | 0,0089 | 1,00E-04 |
| HSD17B4   | 24962 | 1361,7408 | 0,5785 | 0,0089 | 1,00E-04 |
| MKRN1     | 35361 | 1357,8325 | 0,5827 | 0,0089 | 1,00E-04 |
| PHF21A    | 38782 | 1352,4267 | 0,5834 | 0,0089 | 1,00E-04 |
| USP21     | 47008 | 1360,4622 | 0,5838 | 0,0089 | 1,00E-04 |
| AHNAK     | 687   | 1354,4622 | 0,5853 | 0,0089 | 1,00E-04 |
| ISCU      | 25718 | 1360,614  | 0,587  | 0,0089 | 1,00E-04 |
| WDR8      | 47473 | 1371,3172 | 0,5861 | 0,0091 | 1,00E-04 |
| KLHDC2    | 26603 | 1378,5875 | 0,5732 | 0,0094 | 1,00E-04 |
| RBL2      | 40794 | 1383,4684 | 0,5836 | 0,0094 | 1,00E-04 |
| ABR       | 198   | 1395,0623 | 0,559  | 0,0095 | 1,00E-04 |
| RAB5B     | 40530 | 1393,8747 | 0,5792 | 0,0095 | 1,00E-04 |
| RASSF2    | 40752 | 1387,1379 | 0,5863 | 0,0095 | 1,00E-04 |
| VIM       | 47196 | 1398,9858 | 0,5915 | 0,0095 | 1,00E-04 |
| ZMYND8    | 48029 | 1391,4887 | 0,5995 | 0,0095 | 1,00E-04 |
| AIFM1     | 700   | 1403,3416 | 0,6029 | 0,0095 | 1,00E-04 |
| PPM1K     | 39562 | 1402,6834 | 0,5675 | 0,0096 | 1,00E-04 |
| PASK      | 38153 | 1397,999  | 0,568  | 0,0096 | 1,00E-04 |
| KIAA0355  | 26204 | 1399,8897 | 0,57   | 0,0096 | 1,00E-04 |
| SPHK2     | 43901 | 1401,7346 | 0,5776 | 0,0096 | 1,00E-04 |
| DPYSL2    | 7755  | 1399,9302 | 0,5806 | 0,0096 | 1,00E-04 |
| MAP4K1    | 34664 | 1405,0496 | 0,5849 | 0,0096 | 1,00E-04 |
| BRD8      | 2498  | 1404,4269 | 0,5956 | 0,0096 | 1,00E-04 |
| TBC1D10C  | 44762 | 1407,508  | 0,5634 | 0,0097 | 1,00E-04 |
| DUSP18    | 7874  | 1410,9692 | 0,576  | 0,0098 | 1,00E-04 |
| APAF1     | 1252  | 1414,9467 | 0,5676 | 0,0099 | 1,00E-04 |
| C11ORF17  | 2751  | 1415,032  | 0,5745 | 0,0099 | 1,00E-04 |
| AKNA      | 770   | 1412,9357 | 0,588  | 0,0099 | 1,00E-04 |
| DYRK2     | 7947  | 1417,0173 | 0,5673 | 0,01   | 1,00E-04 |

|           |       |           |        |        |          |
|-----------|-------|-----------|--------|--------|----------|
| HS.561747 | 20971 | 1423,3658 | 0,5682 | 0,01   | 1,00E-04 |
| SIGLEC10  | 42684 | 1424,6943 | 0,5713 | 0,01   | 1,00E-04 |
| ARL2BP    | 1520  | 1422,6487 | 0,5802 | 0,01   | 1,00E-04 |
| C5ORF41   | 3857  | 1426,1863 | 0,5911 | 0,0101 | 1,00E-04 |
| COMMD3    | 6052  | 1427,9904 | 0,5916 | 0,0101 | 1,00E-04 |
| LOC730256 | 33881 | 1434,956  | 0,5762 | 0,0102 | 1,00E-04 |
| HS.569104 | 22470 | 1434,2059 | 0,5785 | 0,0102 | 1,00E-04 |
| TMEM50B   | 45598 | 1430,5577 | 0,5795 | 0,0102 | 1,00E-04 |
| ZNF75     | 48651 | 1431,8474 | 0,5855 | 0,0102 | 1,00E-04 |
| TMEM156   | 45470 | 1433,5434 | 0,5855 | 0,0102 | 1,00E-04 |
| SP110     | 43757 | 1440,7143 | 0,5722 | 0,0103 | 1,00E-04 |
| MGC12966  | 35141 | 1447,9511 | 0,594  | 0,0104 | 1,00E-04 |
| VHL       | 47190 | 1447,2923 | 0,5847 | 0,0105 | 1,00E-04 |
| JAK1      | 25839 | 1448,3766 | 0,5857 | 0,0105 | 1,00E-04 |
| DEF8      | 7125  | 1454,456  | 0,5744 | 0,0106 | 1,00E-04 |
| MAT2B     | 34794 | 1456,4924 | 0,6075 | 0,0106 | 1,00E-04 |
| C14ORF106 | 2897  | 1457,5676 | 0,5778 | 0,0107 | 1,00E-04 |
| LOC729559 | 33811 | 1458,2677 | 0,5828 | 0,0107 | 1,00E-04 |
| RAB7L1    | 40540 | 1460,7444 | 0,5835 | 0,0107 | 1,00E-04 |
| ANKRD13D  | 1070  | 1460,5203 | 0,5968 | 0,0107 | 1,00E-04 |
| FLJ25778  | 9698  | 1460,8067 | 0,602  | 0,0107 | 1,00E-04 |
| XKR8      | 47660 | 1464,6811 | 0,5923 | 0,0108 | 1,00E-04 |
| LOC727762 | 33553 | 1469,6255 | 0,5827 | 0,0109 | 1,00E-04 |
| ARHGAP1   | 1407  | 1478,4212 | 0,5818 | 0,011  | 1,00E-04 |
| BTN3A1    | 2598  | 1475,8741 | 0,5824 | 0,011  | 1,00E-04 |
| METT11D1  | 35056 | 1475,7898 | 0,59   | 0,011  | 1,00E-04 |
| TUBB      | 46510 | 1475,3551 | 0,5975 | 0,011  | 1,00E-04 |
| FCRL2     | 9338  | 1483,8633 | 0,5894 | 0,0111 | 1,00E-04 |
| ZNF34     | 48263 | 1485,491  | 0,5957 | 0,0111 | 1,00E-04 |
| SIDT1     | 42678 | 1487,141  | 0,5704 | 0,0112 | 1,00E-04 |
| SLC15A3   | 42818 | 1488,0708 | 0,5867 | 0,0112 | 1,00E-04 |
| LOC652495 | 32728 | 1487,3431 | 0,6084 | 0,0112 | 1,00E-04 |
| TCTN1     | 44974 | 1490,1831 | 0,6269 | 0,0112 | 1,00E-04 |
| LTB       | 34326 | 1500,835  | 0,5645 | 0,0113 | 1,00E-04 |
| CXCL16    | 6661  | 1500,6866 | 0,5704 | 0,0113 | 1,00E-04 |
| MCCC1     | 34878 | 1498,2714 | 0,578  | 0,0113 | 1,00E-04 |
| C17ORF56  | 3110  | 1499,7443 | 0,6027 | 0,0113 | 1,00E-04 |
| FLJ20444  | 9633  | 1494,3509 | 0,6034 | 0,0113 | 1,00E-04 |
| HS.532698 | 16864 | 1507,0371 | 0,5814 | 0,0115 | 1,00E-04 |
| DUS2L     | 7854  | 1504,3808 | 0,5895 | 0,0115 | 1,00E-04 |
| SLC22A15  | 42875 | 1507,625  | 0,5995 | 0,0115 | 1,00E-04 |
| CASP2     | 4458  | 1505,0164 | 0,6015 | 0,0115 | 1,00E-04 |
| PCMTD2    | 38368 | 1518,2577 | 0,5796 | 0,0117 | 1,00E-04 |
| PTPRO     | 40317 | 1512,4407 | 0,5823 | 0,0117 | 1,00E-04 |
| MED16     | 34967 | 1514,5773 | 0,5833 | 0,0117 | 1,00E-04 |
| CASP1     | 4449  | 1512,4929 | 0,6006 | 0,0117 | 1,00E-04 |
| RPUSD1    | 41697 | 1510,8413 | 0,6021 | 0,0117 | 1,00E-04 |

|           |       |           |        |        |          |
|-----------|-------|-----------|--------|--------|----------|
| KIAA0040  | 26163 | 1509,4    | 0,6029 | 0,0117 | 1,00E-04 |
| LOC652694 | 32844 | 1510,1405 | 0,8011 | 0,0117 | 1,00E-04 |
| FAM53B    | 8982  | 1519,2834 | 0,5726 | 0,0118 | 1,00E-04 |
| LIPA      | 27275 | 1519,7639 | 0,592  | 0,0118 | 1,00E-04 |
| GPT2      | 11298 | 1518,0399 | 0,6082 | 0,0118 | 1,00E-04 |
| C21ORF33  | 3581  | 1525,3416 | 0,5811 | 0,0119 | 1,00E-04 |
| FAM116A   | 8794  | 1522,4858 | 0,5827 | 0,0119 | 1,00E-04 |
| LOC338799 | 27830 | 1523,8595 | 0,595  | 0,0119 | 1,00E-04 |
| CDCA7L    | 5118  | 1535,3056 | 0,5938 | 0,0122 | 1,00E-04 |
| SLC16A4   | 42832 | 1533,8128 | 0,5986 | 0,0122 | 1,00E-04 |
| CBFA2T2   | 4513  | 1531,3905 | 0,5994 | 0,0122 | 1,00E-04 |
| CEP192    | 5342  | 1533,0219 | 0,603  | 0,0122 | 1,00E-04 |
| SMARCB1   | 43382 | 1541,4745 | 0,5788 | 0,0123 | 1,00E-04 |
| FAM62A    | 9000  | 1542,2547 | 0,5849 | 0,0123 | 1,00E-04 |
| LACTB     | 26926 | 1545,0954 | 0,5923 | 0,0123 | 1,00E-04 |
| IRF5      | 25692 | 1539,4679 | 0,5933 | 0,0123 | 1,00E-04 |
| CRYZL1    | 6354  | 1537,0847 | 0,6003 | 0,0123 | 1,00E-04 |
| DDX23     | 7069  | 1541,397  | 0,6108 | 0,0123 | 1,00E-04 |
| SYNE2     | 44531 | 1540,7272 | 0,6352 | 0,0123 | 1,00E-04 |
| ERP29     | 8533  | 1548,2649 | 0,6045 | 0,0124 | 1,00E-04 |
| ANKRD13A  | 1063  | 1551,8051 | 0,5832 | 0,0125 | 1,00E-04 |
| STK36     | 44317 | 1552,8169 | 0,6009 | 0,0125 | 1,00E-04 |
| ST3GAL5   | 44165 | 1564,4957 | 0,578  | 0,0128 | 1,00E-04 |
| LOC650826 | 32229 | 1565,5547 | 0,617  | 0,0128 | 1,00E-04 |
| TIFA      | 45239 | 1571,5583 | 0,5863 | 0,0129 | 1,00E-04 |
| IFIT2     | 25213 | 1568,8276 | 0,5873 | 0,0129 | 1,00E-04 |
| AP1M1     | 1219  | 1564,3529 | 0,6015 | 0,0129 | 1,00E-04 |
| RNASEL    | 41289 | 1572,2437 | 0,6025 | 0,0129 | 1,00E-04 |
| FOXO3     | 10162 | 1567,1326 | 0,6042 | 0,0129 | 1,00E-04 |
| USP21     | 47006 | 1572,9887 | 0,6095 | 0,0129 | 1,00E-04 |
| ARID4A    | 1497  | 1571,121  | 0,6102 | 0,0129 | 1,00E-04 |
| HERC5     | 11809 | 1589,3921 | 0,5857 | 0,0133 | 1,00E-04 |
| LSP1      | 34309 | 1588,3188 | 0,5868 | 0,0133 | 1,00E-04 |
| KIAA1370  | 26343 | 1601,0803 | 0,5745 | 0,0134 | 1,00E-04 |
| ZFP90     | 47946 | 1598,5067 | 0,5894 | 0,0134 | 1,00E-04 |
| GNS       | 11024 | 1601,544  | 0,5995 | 0,0134 | 1,00E-04 |
| CDAN1     | 5045  | 1595,4838 | 0,6001 | 0,0134 | 1,00E-04 |
| LYK5      | 34384 | 1601,543  | 0,601  | 0,0134 | 1,00E-04 |
| HS.406106 | 15516 | 1591,7556 | 0,6116 | 0,0134 | 1,00E-04 |
| TAP2      | 44702 | 1591,8853 | 0,6287 | 0,0134 | 1,00E-04 |
| CD79A     | 5008  | 1608,8821 | 0,5757 | 0,0136 | 1,00E-04 |
| SS18      | 44091 | 1608,6186 | 0,5918 | 0,0136 | 1,00E-04 |
| FAM39DP   | 8941  | 1613,3401 | 0,5925 | 0,0137 | 1,00E-04 |
| RPS4Y1    | 41666 | 1611,7676 | 0,8896 | 0,0137 | 1,00E-04 |
| TMEM154   | 45468 | 1616,999  | 0,5949 | 0,0138 | 1,00E-04 |
| C14ORF159 | 2944  | 1616,8318 | 0,6029 | 0,0138 | 1,00E-04 |
| SPECC1L   | 43875 | 1624,6405 | 0,5892 | 0,014  | 1,00E-04 |



|           |       |           |        |        |          |
|-----------|-------|-----------|--------|--------|----------|
| DCLRE1C   | 6970  | 1625,1951 | 0,618  | 0,014  | 1,00E-04 |
| SP110     | 43754 | 1629,5191 | 0,6057 | 0,0141 | 1,00E-04 |
| SYT17     | 44575 | 1627,6275 | 0,6199 | 0,0141 | 1,00E-04 |
| RPA1      | 41483 | 1631,3695 | 0,5935 | 0,0143 | 2,00E-04 |
| MGEA5     | 35279 | 1634,2415 | 0,5956 | 0,0143 | 2,00E-04 |
| SDHA      | 42149 | 1633,5657 | 0,6003 | 0,0143 | 2,00E-04 |
| PTPRA     | 40291 | 1637,3324 | 0,6057 | 0,0143 | 2,00E-04 |
| USF1      | 46971 | 1650,7971 | 0,5927 | 0,0144 | 2,00E-04 |
| TSC1      | 46253 | 1647,6148 | 0,594  | 0,0144 | 2,00E-04 |
| LAMA5     | 26952 | 1653,08   | 0,5961 | 0,0144 | 2,00E-04 |
| ARID1A    | 1487  | 1640,157  | 0,5967 | 0,0144 | 2,00E-04 |
| SPAST     | 43827 | 1644,124  | 0,6082 | 0,0144 | 2,00E-04 |
| ABLIM1    | 193   | 1649,6045 | 0,6094 | 0,0144 | 2,00E-04 |
| MED16     | 34966 | 1644,5758 | 0,6112 | 0,0144 | 2,00E-04 |
| DHRS1     | 7277  | 1641,3352 | 0,6167 | 0,0144 | 2,00E-04 |
| DEF6      | 7122  | 1655,8123 | 0,5901 | 0,0145 | 2,00E-04 |
| LOC730744 | 33924 | 1646,2778 | 0,5968 | 0,0145 | 2,00E-04 |
| PAPSS1    | 38087 | 1654,1307 | 0,604  | 0,0145 | 2,00E-04 |
| RBM33     | 40828 | 1643,1678 | 0,6091 | 0,0145 | 2,00E-04 |
| GALK2     | 10502 | 1649,38   | 0,6101 | 0,0145 | 2,00E-04 |
| C6ORF136  | 3893  | 1646,931  | 0,6135 | 0,0145 | 2,00E-04 |
| ZNF792    | 48687 | 1646,8503 | 0,6135 | 0,0145 | 2,00E-04 |
| ZNF74     | 48646 | 1644,0672 | 0,621  | 0,0145 | 2,00E-04 |
| SLC15A4   | 42820 | 1653,7695 | 0,6259 | 0,0145 | 2,00E-04 |
| LOC339123 | 27842 | 1659,6193 | 0,5967 | 0,0147 | 2,00E-04 |
| MAP3K7IP1 | 34653 | 1661,0988 | 0,6214 | 0,0147 | 2,00E-04 |
| ECOP      | 8014  | 1662,5028 | 0,5978 | 0,0148 | 2,00E-04 |
| PLA2G4B   | 39044 | 1669,9363 | 0,6061 | 0,0148 | 2,00E-04 |
| CBR4      | 4533  | 1668,3511 | 0,6169 | 0,0148 | 2,00E-04 |
| DHRS7     | 7288  | 1664,4388 | 0,6202 | 0,0148 | 2,00E-04 |
| MIA3      | 35298 | 1668,9482 | 0,6056 | 0,0149 | 2,00E-04 |
| GTF2IP1   | 11521 | 1667,5876 | 0,6155 | 0,0149 | 2,00E-04 |
| KLF13     | 26584 | 1673,8869 | 0,604  | 0,015  | 2,00E-04 |
| RASSF2    | 40750 | 1674,1507 | 0,6095 | 0,015  | 2,00E-04 |
| CXXC5     | 6719  | 1677,5985 | 0,5836 | 0,0151 | 2,00E-04 |
| SGSM2     | 42562 | 1681,2988 | 0,589  | 0,0151 | 2,00E-04 |
| RWDD2A    | 41838 | 1678,7193 | 0,6046 | 0,0151 | 2,00E-04 |
| TCL1A     | 44941 | 1678,876  | 0,6048 | 0,0151 | 2,00E-04 |
| RPA1      | 41482 | 1677,7639 | 0,6067 | 0,0151 | 2,00E-04 |
| SNX1      | 43610 | 1678,0641 | 0,6073 | 0,0151 | 2,00E-04 |
| JARID1D   | 25850 | 1681,4084 | 0,7531 | 0,0151 | 2,00E-04 |
| UPF3A     | 46935 | 1685,6564 | 0,6199 | 0,0152 | 2,00E-04 |
| SLC25A12  | 42916 | 1684,9826 | 0,6207 | 0,0152 | 2,00E-04 |
| NBN       | 36228 | 1687,7992 | 0,6254 | 0,0152 | 2,00E-04 |
| ATRN      | 1993  | 1690,7346 | 0,6037 | 0,0153 | 2,00E-04 |
| TSPAN3    | 46321 | 1688,9107 | 0,6258 | 0,0153 | 2,00E-04 |
| TMEM14C   | 45460 | 1692,7079 | 0,6265 | 0,0153 | 2,00E-04 |

|           |       |           |        |        |          |
|-----------|-------|-----------|--------|--------|----------|
| TSPO      | 46340 | 1687,398  | 0,7718 | 0,0153 | 2,00E-04 |
| HIVEP1    | 11989 | 1695,2291 | 0,5725 | 0,0154 | 2,00E-04 |
| SP1       | 43750 | 1694,6858 | 0,6085 | 0,0154 | 2,00E-04 |
| ZNF671    | 48590 | 1700,241  | 0,6269 | 0,0154 | 2,00E-04 |
| GPX1      | 11299 | 1704,4479 | 0,5919 | 0,0155 | 2,00E-04 |
| FLJ20489  | 9637  | 1704,8933 | 0,6097 | 0,0155 | 2,00E-04 |
| ATG2A     | 1789  | 1703,4682 | 0,6014 | 0,0156 | 2,00E-04 |
| ZFP106    | 47929 | 1702,8228 | 0,6108 | 0,0156 | 2,00E-04 |
| OSGEPL1   | 37847 | 1706,0767 | 0,6334 | 0,0156 | 2,00E-04 |
| LOC651575 | 32427 | 1711,993  | 0,6117 | 0,0158 | 2,00E-04 |
| HS.550293 | 19920 | 1724,3736 | 0,5937 | 0,0161 | 2,00E-04 |
| PLAC8     | 39065 | 1720,5127 | 0,6028 | 0,0161 | 2,00E-04 |
| TRAPPC2   | 46006 | 1724,6336 | 0,6208 | 0,0161 | 2,00E-04 |
| SNRP70    | 43575 | 1722,5674 | 0,6255 | 0,0161 | 2,00E-04 |
| C21ORF59  | 3613  | 1722,5257 | 0,6275 | 0,0161 | 2,00E-04 |
| CAPN1     | 4381  | 1729,2773 | 0,6189 | 0,0162 | 2,00E-04 |
| DPAGT1    | 7692  | 1731,4837 | 0,6213 | 0,0162 | 2,00E-04 |
| C11ORF2   | 2752  | 1742,1122 | 0,5982 | 0,0163 | 2,00E-04 |
| PYHIN1    | 40411 | 1740,2252 | 0,5993 | 0,0163 | 2,00E-04 |
| CYFIP2    | 6753  | 1740,0192 | 0,6089 | 0,0163 | 2,00E-04 |
| ITM2B     | 25810 | 1736,8986 | 0,6128 | 0,0163 | 2,00E-04 |
| NUP62     | 37145 | 1743,3017 | 0,6132 | 0,0163 | 2,00E-04 |
| STARD7    | 44248 | 1742,4493 | 0,625  | 0,0163 | 2,00E-04 |
| RNASET2   | 41292 | 1745,5375 | 0,6011 | 0,0164 | 2,00E-04 |
| IFNAR2    | 25244 | 1742,0326 | 0,6299 | 0,0164 | 2,00E-04 |
| APPL2     | 1343  | 1749,5225 | 0,6034 | 0,0165 | 2,00E-04 |
| TIMELESS  | 45251 | 1748,9891 | 0,6109 | 0,0165 | 2,00E-04 |
| LOC728554 | 33680 | 1760,4043 | 0,5986 | 0,0166 | 2,00E-04 |
| TYK2      | 46605 | 1758,8935 | 0,6008 | 0,0166 | 2,00E-04 |
| RHBDD2    | 41162 | 1755,9464 | 0,6043 | 0,0166 | 2,00E-04 |
| OSBPL9    | 37842 | 1761,6352 | 0,6159 | 0,0166 | 2,00E-04 |
| SYS1      | 44562 | 1755,5132 | 0,6162 | 0,0166 | 2,00E-04 |
| KIAA0125  | 26170 | 1756,6111 | 0,6188 | 0,0166 | 2,00E-04 |
| CECR5     | 5278  | 1760,06   | 0,6197 | 0,0166 | 2,00E-04 |
| TAF1C     | 44654 | 1755,8518 | 0,6209 | 0,0166 | 2,00E-04 |
| FBXL15    | 9185  | 1759,6244 | 0,6262 | 0,0166 | 2,00E-04 |
| RIPK5     | 41245 | 1763,0863 | 0,6117 | 0,0167 | 2,00E-04 |
| OPN3      | 37319 | 1764,6168 | 0,6124 | 0,0168 | 2,00E-04 |
| SAMM50    | 41936 | 1767,8787 | 0,621  | 0,0168 | 2,00E-04 |
| TRIM25    | 46077 | 1765,4796 | 0,6333 | 0,0168 | 2,00E-04 |
| BLR1      | 2386  | 1771,2168 | 0,6183 | 0,017  | 2,00E-04 |
| LOC153364 | 27518 | 1773,1329 | 0,6266 | 0,017  | 2,00E-04 |
| ETS1      | 8577  | 1777,8541 | 0,5927 | 0,0172 | 2,00E-04 |
| LRDD      | 34138 | 1777,9344 | 0,615  | 0,0172 | 2,00E-04 |
| ZNF564    | 48460 | 1777,1354 | 0,6217 | 0,0172 | 2,00E-04 |
| POLD4     | 39333 | 1780,7154 | 0,6171 | 0,0173 | 2,00E-04 |
| SPG7      | 43897 | 1789,3942 | 0,5991 | 0,0175 | 2,00E-04 |

|           |       |           |        |        |          |
|-----------|-------|-----------|--------|--------|----------|
| HS.481659 | 16233 | 1790,026  | 0,6212 | 0,0175 | 2,00E-04 |
| ZBTB24    | 47797 | 1790,3133 | 0,6238 | 0,0175 | 2,00E-04 |
| TMEM154   | 45467 | 1792,4178 | 0,5862 | 0,0176 | 2,00E-04 |
| FXYD5     | 10356 | 1798,9522 | 0,5975 | 0,0177 | 2,00E-04 |
| LFNG      | 27149 | 1799,9412 | 0,6279 | 0,0177 | 2,00E-04 |
| S100PBP   | 41887 | 1799,3755 | 0,632  | 0,0177 | 2,00E-04 |
| IKZF1     | 25351 | 1805,4976 | 0,5938 | 0,0178 | 2,00E-04 |
| LANCL1    | 26973 | 1805,2059 | 0,617  | 0,0178 | 2,00E-04 |
| C22ORF29  | 3648  | 1807,3067 | 0,6336 | 0,0178 | 2,00E-04 |
| HS.20255  | 14067 | 1804,7124 | 0,6404 | 0,0178 | 2,00E-04 |
| TMCO3     | 45377 | 1810,222  | 0,6042 | 0,018  | 2,00E-04 |
| FLJ20718  | 9646  | 1817,7525 | 0,6303 | 0,0183 | 2,00E-04 |
| MGC71993  | 35273 | 1823,2198 | 0,6142 | 0,0184 | 2,00E-04 |
| ZNF446    | 48349 | 1820,0998 | 0,6193 | 0,0184 | 2,00E-04 |
| RFX5      | 41072 | 1824,3476 | 0,6197 | 0,0184 | 2,00E-04 |
| GUSBL1    | 11577 | 1823,4554 | 0,6285 | 0,0184 | 2,00E-04 |
| SPG11     | 43886 | 1820,9352 | 0,6337 | 0,0184 | 2,00E-04 |
| ATP5A1    | 1889  | 1824,7906 | 0,6338 | 0,0184 | 2,00E-04 |
| TMEM77    | 45628 | 1829,4274 | 0,6044 | 0,0185 | 2,00E-04 |
| DNAJB2    | 7570  | 1841,3234 | 0,6109 | 0,0187 | 2,00E-04 |
| ZFP3      | 47934 | 1836,4992 | 0,6165 | 0,0187 | 2,00E-04 |
| ZNF573    | 48475 | 1840,4549 | 0,6171 | 0,0187 | 2,00E-04 |
| FNBP1     | 10075 | 1835,0626 | 0,6287 | 0,0187 | 2,00E-04 |
| GRN       | 11421 | 1843,818  | 0,6047 | 0,0188 | 2,00E-04 |
| ADAM19    | 412   | 1842,9013 | 0,6135 | 0,0188 | 2,00E-04 |
| C12ORF52  | 2853  | 1840,2846 | 0,6159 | 0,0188 | 2,00E-04 |
| CHI3L2    | 5478  | 1841,1702 | 0,6954 | 0,0188 | 2,00E-04 |
| AMT       | 978   | 1851,0472 | 0,6117 | 0,019  | 2,00E-04 |
| GMPR2     | 10948 | 1854,871  | 0,6166 | 0,019  | 2,00E-04 |
| HNRPUL1   | 12144 | 1851,5474 | 0,6204 | 0,019  | 2,00E-04 |
| HARS2     | 11667 | 1850,5106 | 0,6381 | 0,019  | 2,00E-04 |
| ZMAT5     | 48005 | 1848,4556 | 0,6413 | 0,019  | 2,00E-04 |
| HNRPUL2   | 12147 | 1863,0294 | 0,6228 | 0,0193 | 3,00E-04 |
| C12ORF10  | 2816  | 1870,6268 | 0,6341 | 0,0195 | 3,00E-04 |
| RERE      | 41004 | 1873,8697 | 0,6226 | 0,0197 | 3,00E-04 |
| TCEAL8    | 44889 | 1878,1485 | 0,6157 | 0,0199 | 3,00E-04 |
| NBPF3     | 36251 | 1880,7038 | 0,6244 | 0,0199 | 3,00E-04 |
| CNDP2     | 5859  | 1885,4396 | 0,6201 | 0,02   | 3,00E-04 |
| STAT1     | 44252 | 1883,6    | 0,6341 | 0,02   | 3,00E-04 |
| LOC153364 | 27517 | 1884,4827 | 0,6455 | 0,02   | 3,00E-04 |
| ECHDC2    | 8006  | 1888,3601 | 0,6085 | 0,0201 | 3,00E-04 |
| KLHDC3    | 26604 | 1889,7509 | 0,6332 | 0,0201 | 3,00E-04 |
| TCFL5     | 44934 | 1892,2131 | 0,6189 | 0,0202 | 3,00E-04 |
| ZNF443    | 48346 | 1893,4398 | 0,6198 | 0,0202 | 3,00E-04 |
| GIT2      | 10808 | 1902,0062 | 0,6333 | 0,0205 | 3,00E-04 |
| ATP2B4    | 1877  | 1901,858  | 0,6398 | 0,0206 | 3,00E-04 |
| VIM       | 47197 | 1909,3813 | 0,6245 | 0,0207 | 3,00E-04 |

|           |       |           |        |        |          |
|-----------|-------|-----------|--------|--------|----------|
| SLC25A42  | 42968 | 1907,9625 | 0,6281 | 0,0207 | 3,00E-04 |
| IFNGR2    | 25252 | 1911,6732 | 0,6287 | 0,0207 | 3,00E-04 |
| ATP5A1    | 1888  | 1909,5115 | 0,6372 | 0,0207 | 3,00E-04 |
| CIAO1     | 5584  | 1904,4846 | 0,6429 | 0,0207 | 3,00E-04 |
| MCEE      | 34881 | 1913,5826 | 0,6421 | 0,0208 | 3,00E-04 |
| NDUFS3    | 36383 | 1914,9108 | 0,6436 | 0,0208 | 3,00E-04 |
| ZBTB4     | 47810 | 1920,6908 | 0,6108 | 0,0209 | 3,00E-04 |
| HS.400256 | 15470 | 1917,3327 | 0,621  | 0,0209 | 3,00E-04 |
| HS.194225 | 13909 | 1918,1267 | 0,621  | 0,0209 | 3,00E-04 |
| C8ORF55   | 4066  | 1918,3959 | 0,6223 | 0,0209 | 3,00E-04 |
| CTPS2     | 6575  | 1918,8251 | 0,6229 | 0,0209 | 3,00E-04 |
| ACAD11    | 213   | 1924,7266 | 0,6078 | 0,021  | 3,00E-04 |
| PLEKHO1   | 39165 | 1922,8093 | 0,6128 | 0,021  | 3,00E-04 |
| RALB      | 40632 | 1925,2769 | 0,6386 | 0,021  | 3,00E-04 |
| FAM111A   | 8787  | 1927,0384 | 0,6085 | 0,0211 | 3,00E-04 |
| CAPRIN2   | 4409  | 1930,6606 | 0,6261 | 0,0212 | 3,00E-04 |
| NLRX1     | 36675 | 1929,7074 | 0,6278 | 0,0212 | 3,00E-04 |
| RNF34     | 41388 | 1929,4052 | 0,6308 | 0,0212 | 3,00E-04 |
| ARHGEF6   | 1480  | 1934,0364 | 0,6067 | 0,0214 | 3,00E-04 |
| NDUFB10   | 36367 | 1934,9455 | 0,639  | 0,0214 | 3,00E-04 |
| NSUN5C    | 37011 | 1937,4696 | 0,6559 | 0,0215 | 3,00E-04 |
| CDC2L6    | 5081  | 1943,0034 | 0,6129 | 0,0218 | 3,00E-04 |
| C4ORF14   | 3791  | 1943,4689 | 0,6425 | 0,0218 | 3,00E-04 |
| SYPL1     | 44559 | 1948,7407 | 0,6246 | 0,0219 | 3,00E-04 |
| PASK      | 38152 | 1951,3609 | 0,6262 | 0,0219 | 3,00E-04 |
| PGM1      | 38709 | 1949,4772 | 0,6318 | 0,0219 | 3,00E-04 |
| MKKS      | 35352 | 1948,3531 | 0,6343 | 0,0219 | 3,00E-04 |
| PRKAB2    | 39811 | 1955,3998 | 0,6341 | 0,022  | 3,00E-04 |
| ANKRA2    | 1056  | 1959,0505 | 0,6254 | 0,0221 | 3,00E-04 |
| ADD3      | 519   | 1957,7155 | 0,6258 | 0,0221 | 3,00E-04 |
| RHBDD2    | 41161 | 1962,0447 | 0,6177 | 0,0222 | 3,00E-04 |
| CTNNBIP1  | 6559  | 1962,8258 | 0,6193 | 0,0222 | 3,00E-04 |
| WNT3      | 47567 | 1960,1072 | 0,7238 | 0,0222 | 3,00E-04 |
| DNASE1L1  | 7615  | 1966,8133 | 0,6165 | 0,0224 | 3,00E-04 |
| HLTF      | 12039 | 1970,3512 | 0,6514 | 0,0226 | 3,00E-04 |
| ATP2A3    | 1866  | 1976,1543 | 0,6047 | 0,0228 | 3,00E-04 |
| THYN1     | 45221 | 1976,7107 | 0,6549 | 0,0228 | 3,00E-04 |
| TRPT1     | 46228 | 1978,0597 | 0,6179 | 0,0229 | 3,00E-04 |
| MED20     | 34971 | 1981,7128 | 0,6198 | 0,023  | 3,00E-04 |
| DGCR6     | 7235  | 1980,4732 | 0,6306 | 0,023  | 3,00E-04 |
| ZNF177    | 48088 | 1981,4531 | 0,6323 | 0,023  | 3,00E-04 |
| SCARB2    | 42015 | 1983,6441 | 0,6187 | 0,0231 | 3,00E-04 |
| TMEM134   | 45443 | 1984,4762 | 0,6273 | 0,0231 | 3,00E-04 |
| MFSD3     | 35104 | 1982,9829 | 0,6377 | 0,0231 | 3,00E-04 |
| FRAT1     | 10197 | 1983,1447 | 0,6392 | 0,0231 | 3,00E-04 |
| HS.572649 | 22943 | 1993,0703 | 0,6297 | 0,0233 | 3,00E-04 |
| RNF146    | 41337 | 1990,5404 | 0,6322 | 0,0233 | 3,00E-04 |

|           |       |           |        |        |          |
|-----------|-------|-----------|--------|--------|----------|
| CEACAM1   | 5256  | 1999,4538 | 0,6348 | 0,0234 | 3,00E-04 |
| LOC647000 | 31119 | 1999,1043 | 0,638  | 0,0234 | 3,00E-04 |
| PDHB      | 38512 | 1994,6938 | 0,6438 | 0,0234 | 3,00E-04 |
| LOC153561 | 27520 | 1997,7723 | 0,6199 | 0,0235 | 3,00E-04 |
| NIPSNAP1  | 36596 | 1998,6533 | 0,6304 | 0,0235 | 3,00E-04 |
| PDE7A     | 38480 | 2006,9232 | 0,6374 | 0,0236 | 3,00E-04 |
| INPPL1    | 25602 | 2009,2632 | 0,6157 | 0,0237 | 3,00E-04 |
| MBD4      | 34832 | 2009,2868 | 0,6385 | 0,0237 | 3,00E-04 |
| PARP3     | 38132 | 2015,6565 | 0,6216 | 0,0238 | 3,00E-04 |
| FAM156A   | 8884  | 2010,9515 | 0,6338 | 0,0238 | 3,00E-04 |
| RAI1      | 40627 | 2013,9442 | 0,6396 | 0,0238 | 3,00E-04 |
| HDDC3     | 11749 | 2012,4234 | 0,6545 | 0,0238 | 3,00E-04 |
| PARP10    | 38121 | 2023,8346 | 0,6306 | 0,024  | 4,00E-04 |
| ITGB7     | 25791 | 2025,1888 | 0,6307 | 0,0241 | 4,00E-04 |
| PSME1     | 40134 | 2021,8162 | 0,6364 | 0,0241 | 4,00E-04 |
| IDH1      | 25179 | 2023,4172 | 0,6469 | 0,0241 | 4,00E-04 |
| GNB5      | 10984 | 2033,5744 | 0,6318 | 0,0243 | 4,00E-04 |
| BAD       | 2113  | 2029,8811 | 0,6414 | 0,0243 | 4,00E-04 |
| CEP68     | 5354  | 2033,0153 | 0,6381 | 0,0244 | 4,00E-04 |
| AP2S1     | 1235  | 2037,2143 | 0,6418 | 0,0245 | 4,00E-04 |
| RPAIN     | 41488 | 2035,7752 | 0,6436 | 0,0245 | 4,00E-04 |
| MLKL      | 35379 | 2044,1807 | 0,6188 | 0,0249 | 4,00E-04 |
| ADA       | 393   | 2048,0897 | 0,619  | 0,025  | 4,00E-04 |
| ZC3H3     | 47838 | 2046,6148 | 0,6202 | 0,025  | 4,00E-04 |
| RNF38     | 41393 | 2047,1026 | 0,6206 | 0,025  | 4,00E-04 |
| RUNDC1    | 41810 | 2050,7116 | 0,6227 | 0,025  | 4,00E-04 |
| OSTF1     | 37859 | 2051,85   | 0,6296 | 0,025  | 4,00E-04 |
| SAP130    | 41939 | 2047,6391 | 0,6352 | 0,025  | 4,00E-04 |
| ZC3HAV1   | 47848 | 2049,8944 | 0,6367 | 0,025  | 4,00E-04 |
| VAMP8     | 47112 | 2045,4886 | 0,6462 | 0,025  | 4,00E-04 |
| SH2B1     | 42567 | 2053,3222 | 0,6447 | 0,0251 | 4,00E-04 |
| CXCR5     | 6674  | 2057,7845 | 0,6365 | 0,0254 | 4,00E-04 |
| GUSBL1    | 11578 | 2060,5907 | 0,622  | 0,0255 | 4,00E-04 |
| BIN1      | 2357  | 2065,098  | 0,6278 | 0,0256 | 4,00E-04 |
| C10ORF6   | 2705  | 2069,035  | 0,6292 | 0,0256 | 4,00E-04 |
| PAOX      | 38073 | 2067,487  | 0,6419 | 0,0256 | 4,00E-04 |
| SMARCC2   | 43387 | 2062,3142 | 0,6444 | 0,0256 | 4,00E-04 |
| HS.371609 | 15250 | 2065,5168 | 0,6465 | 0,0256 | 4,00E-04 |
| PRMT2     | 39885 | 2069,8902 | 0,6523 | 0,0256 | 4,00E-04 |
| GVIN1     | 11581 | 2068,3554 | 0,6126 | 0,0257 | 4,00E-04 |
| MAPK3     | 34701 | 2071,3009 | 0,633  | 0,0257 | 4,00E-04 |
| C4ORF34   | 3814  | 2070,6479 | 0,6415 | 0,0257 | 4,00E-04 |
| HS1BP3    | 24928 | 2068,9825 | 0,6508 | 0,0257 | 4,00E-04 |
| LOC653853 | 33394 | 2074,2402 | 0,6576 | 0,0258 | 4,00E-04 |
| GLB1      | 10849 | 2078,057  | 0,6131 | 0,0259 | 4,00E-04 |
| COG4      | 5960  | 2079,4566 | 0,6464 | 0,0259 | 4,00E-04 |
| RNASEL    | 41288 | 2078,7148 | 0,6474 | 0,0259 | 4,00E-04 |

|           |       |           |        |        |          |
|-----------|-------|-----------|--------|--------|----------|
| DPY30     | 7752  | 2079,4568 | 0,6498 | 0,0259 | 4,00E-04 |
| FAM120A   | 8803  | 2077,2102 | 0,6537 | 0,0259 | 4,00E-04 |
| PRKCB1    | 39836 | 2081,7999 | 0,6452 | 0,026  | 4,00E-04 |
| LOC652616 | 32793 | 2082,0222 | 0,6536 | 0,026  | 4,00E-04 |
| C14ORF93  | 2995  | 2088,5786 | 0,6324 | 0,0261 | 4,00E-04 |
| DAPP1     | 6902  | 2088,3658 | 0,645  | 0,0261 | 4,00E-04 |
| PHF12     | 38757 | 2084,5857 | 0,6502 | 0,0261 | 4,00E-04 |
| HS.254477 | 14472 | 2093,5629 | 0,6515 | 0,0263 | 4,00E-04 |
| UNC93B1   | 46908 | 2095,2035 | 0,6452 | 0,0264 | 4,00E-04 |
| PPP1R3D   | 39605 | 2099,1575 | 0,6482 | 0,0265 | 4,00E-04 |
| CCDC34    | 4658  | 2100,1667 | 0,6551 | 0,0265 | 4,00E-04 |
| ADAR      | 484   | 2108,4764 | 0,6377 | 0,0266 | 4,00E-04 |
| HS.163426 | 13665 | 2104,9903 | 0,6426 | 0,0266 | 4,00E-04 |
| CRYZL1    | 6355  | 2104,7465 | 0,6483 | 0,0266 | 4,00E-04 |
| TRIM38    | 46105 | 2111,7311 | 0,6514 | 0,0266 | 4,00E-04 |
| HS.561844 | 20991 | 2111,5528 | 0,6523 | 0,0266 | 4,00E-04 |
| DBT       | 6938  | 2109,8397 | 0,6527 | 0,0266 | 4,00E-04 |
| PIM1      | 38922 | 2111,3505 | 0,6189 | 0,0267 | 4,00E-04 |
| FBXO32    | 9244  | 2107,1179 | 0,6284 | 0,0267 | 4,00E-04 |
| ZNF362    | 48278 | 2108,1965 | 0,6318 | 0,0267 | 4,00E-04 |
| DYRK2     | 7949  | 2115,1644 | 0,6333 | 0,0267 | 4,00E-04 |
| VAV1      | 47130 | 2108,3139 | 0,638  | 0,0267 | 4,00E-04 |
| RANBP10   | 40651 | 2108,0384 | 0,6535 | 0,0267 | 4,00E-04 |
| GOLGA3    | 11029 | 2116,5914 | 0,6466 | 0,0268 | 4,00E-04 |
| ZNF248    | 48159 | 2118,6728 | 0,6446 | 0,0269 | 4,00E-04 |
| NDUFS8    | 36388 | 2127,5679 | 0,6337 | 0,0273 | 4,00E-04 |
| RBM4B     | 40850 | 2126,3731 | 0,6347 | 0,0273 | 4,00E-04 |
| ZMIZ1     | 48006 | 2135,5802 | 0,6508 | 0,0277 | 4,00E-04 |
| MUM1      | 35940 | 2134,9615 | 0,6305 | 0,0278 | 4,00E-04 |
| CRYGS     | 6347  | 2141,7798 | 0,6462 | 0,028  | 4,00E-04 |
| MYH9      | 36027 | 2141,6884 | 0,6279 | 0,0281 | 4,00E-04 |
| C4ORF41   | 3823  | 2145,6992 | 0,6524 | 0,0281 | 5,00E-04 |
| RNASE6    | 41280 | 2140,9813 | 0,6591 | 0,0281 | 4,00E-04 |
| FCRL3     | 9341  | 2145,7659 | 0,7268 | 0,0281 | 5,00E-04 |
| BTN3A3    | 2601  | 2145,4756 | 0,6283 | 0,0282 | 5,00E-04 |
| MAGED1    | 34528 | 2156,5048 | 0,6341 | 0,0287 | 5,00E-04 |
| TPD52     | 45902 | 2156,6926 | 0,6352 | 0,0287 | 5,00E-04 |
| CTCF      | 6517  | 2157,7913 | 0,6412 | 0,0287 | 5,00E-04 |
| GMPR2     | 10946 | 2163,5448 | 0,6589 | 0,029  | 5,00E-04 |
| IFITM1    | 25218 | 2163,392  | 0,7894 | 0,0291 | 5,00E-04 |
| TYSND1    | 46612 | 2170,506  | 0,633  | 0,0295 | 5,00E-04 |
| TOP3B     | 45865 | 2173,1426 | 0,6288 | 0,0296 | 5,00E-04 |
| WDR35     | 47400 | 2172,6378 | 0,6486 | 0,0296 | 5,00E-04 |
| HPS4      | 12244 | 2173,5915 | 0,6911 | 0,0296 | 5,00E-04 |
| AKR1B1    | 774   | 2180,1247 | 0,7077 | 0,0298 | 5,00E-04 |
| ZNF831    | 48710 | 2188,2126 | 0,6212 | 0,0303 | 5,00E-04 |
| CD6       | 4994  | 2187,727  | 0,715  | 0,0303 | 5,00E-04 |

|            |       |           |        |        |          |
|------------|-------|-----------|--------|--------|----------|
| DCPS       | 6979  | 2192,9496 | 0,639  | 0,0306 | 5,00E-04 |
| TMEM131    | 45436 | 2193,5284 | 0,6525 | 0,0306 | 5,00E-04 |
| DMAP1      | 7493  | 2203,1194 | 0,6345 | 0,031  | 5,00E-04 |
| BBS1       | 2185  | 2199,6235 | 0,6376 | 0,031  | 5,00E-04 |
| ZCCHC11    | 47854 | 2204,0521 | 0,6378 | 0,031  | 5,00E-04 |
| SLC35E3    | 43092 | 2201,9381 | 0,6391 | 0,031  | 5,00E-04 |
| C1ORF38    | 3378  | 2198,3778 | 0,6638 | 0,031  | 5,00E-04 |
| ZNF33B     | 48262 | 2206,4498 | 0,6403 | 0,0311 | 5,00E-04 |
| FAM111A    | 8786  | 2208,6718 | 0,6292 | 0,0312 | 5,00E-04 |
| HLA-DMB    | 12009 | 2211,3409 | 0,6332 | 0,0313 | 5,00E-04 |
| FAM39DP    | 8940  | 2213,0737 | 0,6367 | 0,0313 | 5,00E-04 |
| NPAL3      | 36813 | 2212,5311 | 0,6496 | 0,0313 | 5,00E-04 |
| LYSMD2     | 34414 | 2216,5117 | 0,6441 | 0,0314 | 5,00E-04 |
| LOC730994  | 33941 | 2222,4332 | 0,6232 | 0,0316 | 5,00E-04 |
| ST3GAL1    | 44159 | 2221,5981 | 0,6368 | 0,0316 | 5,00E-04 |
| C16ORF48   | 3051  | 2222,3605 | 0,6442 | 0,0316 | 5,00E-04 |
| ZNF827     | 48703 | 2219,1626 | 0,6466 | 0,0316 | 5,00E-04 |
| BRCC3      | 2487  | 2218,8674 | 0,6625 | 0,0316 | 5,00E-04 |
| SPI1       | 43904 | 2225,3608 | 0,6374 | 0,0317 | 5,00E-04 |
| PARP12     | 38125 | 2224,3716 | 0,6469 | 0,0317 | 5,00E-04 |
| LOC124446  | 27372 | 2225,4601 | 0,6501 | 0,0317 | 5,00E-04 |
| TMEM14C    | 45461 | 2227,4335 | 0,6642 | 0,0317 | 5,00E-04 |
| HSD17B11   | 24954 | 2224,2263 | 0,6438 | 0,0318 | 5,00E-04 |
| ATXN2      | 2003  | 2230,9296 | 0,6462 | 0,0318 | 5,00E-04 |
| ARSD       | 1629  | 2229,2111 | 0,6867 | 0,0318 | 5,00E-04 |
| SETDB1     | 42441 | 2234,924  | 0,6598 | 0,032  | 5,00E-04 |
| XRCC1      | 47680 | 2237,666  | 0,6519 | 0,0321 | 5,00E-04 |
| COL4A3     | 6008  | 2234,8603 | 0,6835 | 0,0321 | 5,00E-04 |
| ICK        | 25165 | 2241,5166 | 0,6464 | 0,0323 | 5,00E-04 |
| TRRAP      | 46245 | 2243,8539 | 0,6489 | 0,0323 | 5,00E-04 |
| HS.572538  | 22933 | 2243,0281 | 0,6505 | 0,0323 | 5,00E-04 |
| HS.573047  | 22985 | 2242,3362 | 0,6604 | 0,0323 | 5,00E-04 |
| C1ORF83    | 3410  | 2246,3021 | 0,6678 | 0,0324 | 6,00E-04 |
| IFNAR1     | 25243 | 2251,8673 | 0,6427 | 0,0328 | 6,00E-04 |
| HDGF2      | 11752 | 2256,2111 | 0,6448 | 0,033  | 6,00E-04 |
| WRB        | 47582 | 2260,1704 | 0,6493 | 0,0331 | 6,00E-04 |
| HS.483906  | 16242 | 2262,5654 | 0,664  | 0,0332 | 6,00E-04 |
| RPRC1      | 41613 | 2264,4768 | 0,6465 | 0,0333 | 6,00E-04 |
| SETBP1     | 42428 | 2269,7532 | 0,6657 | 0,0335 | 6,00E-04 |
| GPS1       | 11288 | 2271,4789 | 0,6502 | 0,0336 | 6,00E-04 |
| ST6GALNAC4 | 44182 | 2274,5398 | 0,6638 | 0,0338 | 6,00E-04 |
| SEMA4A     | 42265 | 2277,5395 | 0,6427 | 0,0339 | 6,00E-04 |
| SDCCAG3    | 42141 | 2277,4829 | 0,6516 | 0,0339 | 6,00E-04 |
| SGCE       | 42535 | 2276,8916 | 0,6742 | 0,0339 | 6,00E-04 |
| S100A4     | 41874 | 2282,8254 | 0,7295 | 0,0341 | 6,00E-04 |
| EEF2K      | 8073  | 2286,0034 | 0,6501 | 0,0342 | 6,00E-04 |
| CD27       | 4935  | 2292,4004 | 0,6381 | 0,0345 | 6,00E-04 |

|           |       |           |        |        |          |
|-----------|-------|-----------|--------|--------|----------|
| ENTPD6    | 8377  | 2293,2371 | 0,6382 | 0,0345 | 6,00E-04 |
| SMARCA2   | 43376 | 2292,1908 | 0,6421 | 0,0345 | 6,00E-04 |
| HSDL1     | 24970 | 2290,9713 | 0,6585 | 0,0345 | 6,00E-04 |
| TMEM156   | 45471 | 2297,5801 | 0,6304 | 0,0347 | 6,00E-04 |
| FAM125A   | 8815  | 2296,9086 | 0,6385 | 0,0347 | 6,00E-04 |
| CSNK1G2   | 6427  | 2299,2062 | 0,6427 | 0,0347 | 6,00E-04 |
| TMEM140   | 45450 | 2300,7929 | 0,6463 | 0,0347 | 6,00E-04 |
| TBC1D2B   | 44786 | 2303,9133 | 0,6589 | 0,035  | 6,00E-04 |
| LCOR      | 27076 | 2306,036  | 0,661  | 0,035  | 6,00E-04 |
| TACC3     | 44621 | 2310,6117 | 0,6314 | 0,0351 | 6,00E-04 |
| LOC646817 | 31056 | 2310,3608 | 0,6405 | 0,0351 | 6,00E-04 |
| ZNF589    | 48499 | 2308,773  | 0,6476 | 0,0351 | 6,00E-04 |
| AFG3L1    | 605   | 2308,5137 | 0,6538 | 0,0351 | 6,00E-04 |
| EVL       | 8601  | 2312,9414 | 0,643  | 0,0352 | 6,00E-04 |
| PIK3CG    | 38901 | 2314,3434 | 0,6567 | 0,0353 | 6,00E-04 |
| SGSH      | 42559 | 2315,8219 | 0,6492 | 0,0354 | 6,00E-04 |
| NME3      | 36691 | 2316,4803 | 0,6569 | 0,0354 | 6,00E-04 |
| NOD1      | 36729 | 2319,3258 | 0,6564 | 0,0355 | 6,00E-04 |
| TMEM62    | 45610 | 2322,7933 | 0,6469 | 0,0356 | 6,00E-04 |
| ZMIZ2     | 48008 | 2323,5426 | 0,6561 | 0,0356 | 6,00E-04 |
| KIAA1267  | 26328 | 2323,2002 | 0,6747 | 0,0356 | 6,00E-04 |
| C16ORF33  | 3042  | 2329,1827 | 0,6279 | 0,0358 | 6,00E-04 |
| PNPLA6    | 39297 | 2328,8792 | 0,6435 | 0,0358 | 6,00E-04 |
| GSTM2     | 11472 | 2329,9484 | 0,7952 | 0,0358 | 6,00E-04 |
| C14ORF131 | 2918  | 2333,2887 | 0,6595 | 0,036  | 6,00E-04 |
| APOBEC3G  | 1308  | 2334,9249 | 0,6615 | 0,036  | 6,00E-04 |
| ARID3B    | 1493  | 2334,8533 | 0,6438 | 0,0361 | 6,00E-04 |
| TMEM59    | 45607 | 2336,7612 | 0,6586 | 0,0361 | 6,00E-04 |
| GLB1      | 10847 | 2340,3665 | 0,63   | 0,0363 | 6,00E-04 |
| LOC727820 | 33566 | 2344,1837 | 0,6581 | 0,0363 | 7,00E-04 |
| HVCN1     | 25101 | 2342,6153 | 0,6651 | 0,0363 | 7,00E-04 |
| MZF1      | 36114 | 2346,3123 | 0,6611 | 0,0364 | 7,00E-04 |
| GTPBP3    | 11545 | 2345,4564 | 0,6713 | 0,0364 | 7,00E-04 |
| SYT11     | 44565 | 2349,3799 | 0,6505 | 0,0365 | 7,00E-04 |
| QARS      | 40417 | 2348,7029 | 0,6543 | 0,0365 | 7,00E-04 |
| NAGPA     | 36148 | 2352,3649 | 0,6444 | 0,0367 | 7,00E-04 |
| HS.444683 | 15971 | 2355,0929 | 0,6677 | 0,0368 | 7,00E-04 |
| ZIK1      | 47988 | 2360,783  | 0,675  | 0,0372 | 7,00E-04 |
| LOC116236 | 27353 | 2365,5182 | 0,6475 | 0,0375 | 7,00E-04 |
| PI4KB     | 38841 | 2368,0503 | 0,6615 | 0,0375 | 7,00E-04 |
| PGBD2     | 38686 | 2367,5706 | 0,6647 | 0,0375 | 7,00E-04 |
| PHF14     | 38762 | 2366,8269 | 0,6689 | 0,0375 | 7,00E-04 |
| DAPP1     | 6903  | 2370,4604 | 0,6612 | 0,0376 | 7,00E-04 |
| MLL       | 35381 | 2376,0255 | 0,648  | 0,038  | 7,00E-04 |
| EXDL2     | 8610  | 2375,8997 | 0,6705 | 0,038  | 7,00E-04 |
| NDUFA3    | 36356 | 2377,8297 | 0,6694 | 0,0381 | 7,00E-04 |
| SIPA1     | 42715 | 2382,2893 | 0,651  | 0,0383 | 7,00E-04 |



|           |       |           |        |        |          |
|-----------|-------|-----------|--------|--------|----------|
| FIG4      | 9486  | 2383,6021 | 0,6555 | 0,0384 | 7,00E-04 |
| PPFIBP2   | 39510 | 2384,9079 | 0,705  | 0,0384 | 7,00E-04 |
| KIAA1545  | 26372 | 2387,7258 | 0,6532 | 0,0385 | 7,00E-04 |
| SUSD3     | 44471 | 2392,7337 | 0,6343 | 0,0387 | 7,00E-04 |
| ACAA1     | 206   | 2393,0077 | 0,6694 | 0,0387 | 7,00E-04 |
| PYGO2     | 40409 | 2392,4684 | 0,6715 | 0,0387 | 7,00E-04 |
| CRLF3     | 6300  | 2391,6596 | 0,6764 | 0,0387 | 7,00E-04 |
| SYPL1     | 44557 | 2403,6746 | 0,6358 | 0,039  | 7,00E-04 |
| ADRB2     | 573   | 2399,587  | 0,6522 | 0,039  | 7,00E-04 |
| CECR1     | 5274  | 2401,1177 | 0,6551 | 0,039  | 7,00E-04 |
| SBK1      | 41983 | 2399,6725 | 0,6559 | 0,039  | 7,00E-04 |
| PHKB      | 38804 | 2402,468  | 0,6624 | 0,039  | 7,00E-04 |
| KIAA1683  | 26407 | 2403,8563 | 0,6692 | 0,039  | 7,00E-04 |
| SPCS1     | 43863 | 2406,7763 | 0,6702 | 0,0391 | 7,00E-04 |
| TMPO      | 45674 | 2408,3401 | 0,6567 | 0,0392 | 7,00E-04 |
| HS.46506  | 16139 | 2413,9103 | 0,6493 | 0,0394 | 7,00E-04 |
| HERPUD1   | 11812 | 2412,6269 | 0,6639 | 0,0394 | 7,00E-04 |
| GPR132    | 11161 | 2417,2777 | 0,6322 | 0,0395 | 7,00E-04 |
| KIAA0256  | 26189 | 2417,8783 | 0,6483 | 0,0395 | 7,00E-04 |
| C5ORF41   | 3858  | 2414,5082 | 0,6489 | 0,0395 | 7,00E-04 |
| TRIM4     | 46109 | 2416,3356 | 0,6564 | 0,0396 | 7,00E-04 |
| LASP1     | 27002 | 2417,175  | 0,6754 | 0,0396 | 7,00E-04 |
| ATP6V0E2  | 1938  | 2423,0047 | 0,6471 | 0,0397 | 7,00E-04 |
| ST8SIA4   | 44203 | 2422,3374 | 0,6509 | 0,0397 | 7,00E-04 |
| ZNF395    | 48299 | 2425,1514 | 0,6528 | 0,0397 | 7,00E-04 |
| PPP2R4    | 39649 | 2420,899  | 0,6566 | 0,0397 | 7,00E-04 |
| PSAP      | 40017 | 2422,9448 | 0,6604 | 0,0397 | 7,00E-04 |
| MAPK3     | 34700 | 2425,0669 | 0,6595 | 0,0398 | 7,00E-04 |
| IKBKE     | 25346 | 2425,922  | 0,6737 | 0,0398 | 8,00E-04 |
| CXCL10    | 6652  | 2426,952  | 0,7843 | 0,0398 | 8,00E-04 |
| CAPN12    | 4388  | 2432,3819 | 0,6612 | 0,04   | 8,00E-04 |
| MMP11     | 35431 | 2433,9186 | 0,6723 | 0,0401 | 8,00E-04 |
| LIME1     | 27245 | 2436,5843 | 0,6553 | 0,0402 | 8,00E-04 |
| USP13     | 46993 | 2437,8436 | 0,667  | 0,0402 | 8,00E-04 |
| PSMB10    | 40084 | 2443,7017 | 0,6718 | 0,0402 | 8,00E-04 |
| KIAA2026  | 26457 | 2439,989  | 0,6514 | 0,0403 | 8,00E-04 |
| ALDH3A2   | 832   | 2441,8118 | 0,6558 | 0,0403 | 8,00E-04 |
| ACVR1     | 375   | 2447,8716 | 0,6583 | 0,0403 | 8,00E-04 |
| HS.173957 | 13773 | 2442,004  | 0,6585 | 0,0403 | 8,00E-04 |
| FXVD5     | 10358 | 2447,5947 | 0,6604 | 0,0403 | 8,00E-04 |
| C21ORF59  | 3611  | 2444,9772 | 0,6667 | 0,0403 | 8,00E-04 |
| ILK       | 25525 | 2440,8143 | 0,6667 | 0,0403 | 8,00E-04 |
| HS.122456 | 12532 | 2443,0036 | 0,6781 | 0,0403 | 8,00E-04 |
| C2ORF28   | 3674  | 2441,3624 | 0,6829 | 0,0403 | 8,00E-04 |
| GBP5      | 10614 | 2442,9701 | 0,8368 | 0,0403 | 8,00E-04 |
| PYHIN1    | 40410 | 2450,9271 | 0,6401 | 0,0404 | 8,00E-04 |
| ABHD10    | 152   | 2447,5813 | 0,655  | 0,0404 | 8,00E-04 |

|          |       |           |        |        |          |
|----------|-------|-----------|--------|--------|----------|
| KIAA1407 | 26348 | 2447,5255 | 0,6667 | 0,0404 | 8,00E-04 |
| PHKB     | 38801 | 2455,0192 | 0,6679 | 0,0406 | 8,00E-04 |
| N4BP2L1  | 36120 | 2457,3025 | 0,6559 | 0,0407 | 8,00E-04 |
| AES      | 587   | 2460,4056 | 0,6443 | 0,0408 | 8,00E-04 |
| CDC25B   | 5068  | 2460,3938 | 0,6532 | 0,0409 | 8,00E-04 |
| LRRC37A4 | 34209 | 2461,5603 | 0,6543 | 0,0409 | 8,00E-04 |
| SIDT2    | 42679 | 2463,9885 | 0,6576 | 0,0409 | 8,00E-04 |
| KIAA0195 | 26179 | 2465,8406 | 0,6586 | 0,041  | 8,00E-04 |
| ZNF342   | 48265 | 2463,2655 | 0,6695 | 0,041  | 8,00E-04 |
| SNX17    | 43623 | 2463,451  | 0,671  | 0,041  | 8,00E-04 |
| PARP2    | 38129 | 2470,5822 | 0,6736 | 0,0413 | 8,00E-04 |
| ZFYVE26  | 47964 | 2473,2231 | 0,6498 | 0,0415 | 8,00E-04 |
| SUOX     | 44454 | 2479,6716 | 0,6475 | 0,0417 | 8,00E-04 |
| HINT2    | 11895 | 2476,9641 | 0,6568 | 0,0417 | 8,00E-04 |
| LMO4     | 27326 | 2478,4892 | 0,6519 | 0,0418 | 8,00E-04 |
| SESN1    | 42423 | 2481,8947 | 0,6546 | 0,0418 | 8,00E-04 |
| RDH11    | 40939 | 2479,2031 | 0,6656 | 0,0418 | 8,00E-04 |
| DPF2     | 7698  | 2485,3725 | 0,6586 | 0,042  | 8,00E-04 |
| CASD1    | 4445  | 2487,8676 | 0,6444 | 0,0421 | 8,00E-04 |
| PRC1     | 39727 | 2488,4117 | 0,6601 | 0,0421 | 8,00E-04 |
| MSL3L1   | 35777 | 2491,7183 | 0,6741 | 0,0422 | 8,00E-04 |
| PIH1D1   | 38890 | 2491,7142 | 0,6624 | 0,0423 | 8,00E-04 |
| STAM     | 44222 | 2504,6711 | 0,6487 | 0,0424 | 8,00E-04 |
| UBE2T    | 46716 | 2496,3988 | 0,6646 | 0,0424 | 8,00E-04 |
| ITFG2    | 25739 | 2504,5067 | 0,6782 | 0,0424 | 8,00E-04 |
| GSTM1    | 11470 | 2504,9431 | 0,7886 | 0,0424 | 8,00E-04 |
| COASY    | 5947  | 2498,8031 | 0,6612 | 0,0425 | 8,00E-04 |
| PDCD4    | 38426 | 2503,8294 | 0,6669 | 0,0425 | 8,00E-04 |
| STXBP3   | 44387 | 2498,266  | 0,6753 | 0,0425 | 8,00E-04 |
| CALM3    | 4325  | 2503,7646 | 0,6769 | 0,0425 | 8,00E-04 |
| WNT10A   | 47559 | 2503,334  | 0,6566 | 0,0426 | 8,00E-04 |
| KIAA0999 | 26284 | 2509,0032 | 0,6642 | 0,0426 | 9,00E-04 |
| COL9A3   | 6037  | 2509,5761 | 0,6655 | 0,0426 | 9,00E-04 |
| DICER1   | 7342  | 2503,7196 | 0,6675 | 0,0426 | 8,00E-04 |
| TMEM149  | 45457 | 2503,7208 | 0,6926 | 0,0426 | 8,00E-04 |
| RFTN1    | 41053 | 2511,5554 | 0,825  | 0,0426 | 9,00E-04 |
| VPS28    | 47256 | 2502,9029 | 0,6711 | 0,0427 | 8,00E-04 |
| CLUAP1   | 5813  | 2502,7908 | 0,6737 | 0,0427 | 8,00E-04 |
| PRKD2    | 39854 | 2516,1851 | 0,6713 | 0,0429 | 9,00E-04 |
| SNX2     | 43625 | 2518,5267 | 0,6519 | 0,043  | 9,00E-04 |
| ZNF341   | 48264 | 2517,9087 | 0,6715 | 0,043  | 9,00E-04 |
| PHF3     | 38786 | 2529,3642 | 0,6585 | 0,0432 | 9,00E-04 |
| SH3GLB2  | 42602 | 2530,7433 | 0,6585 | 0,0432 | 9,00E-04 |
| ALAD     | 804   | 2529,1008 | 0,663  | 0,0432 | 9,00E-04 |
| ZSCAN18  | 48758 | 2524,9769 | 0,6466 | 0,0433 | 9,00E-04 |
| ACSS2    | 339   | 2535,5717 | 0,6467 | 0,0433 | 9,00E-04 |
| HCP5     | 11724 | 2528,6464 | 0,6507 | 0,0433 | 9,00E-04 |

|               |       |           |        |        |          |
|---------------|-------|-----------|--------|--------|----------|
| KIAA0907      | 26277 | 2535,1643 | 0,6631 | 0,0433 | 9,00E-04 |
| DDX42         | 7088  | 2533,8065 | 0,6631 | 0,0433 | 9,00E-04 |
| CMAS          | 5824  | 2532,3948 | 0,6633 | 0,0433 | 9,00E-04 |
| CDK5RAP2      | 5177  | 2527,5052 | 0,6654 | 0,0433 | 9,00E-04 |
| PPP1CA        | 39568 | 2535,0574 | 0,6666 | 0,0433 | 9,00E-04 |
| XYLT2         | 47698 | 2532,9695 | 0,6686 | 0,0433 | 9,00E-04 |
| PTPLAD1       | 40251 | 2528,7295 | 0,6708 | 0,0433 | 9,00E-04 |
| ZNF2          | 48110 | 2538,4685 | 0,6805 | 0,0433 | 9,00E-04 |
| TMEM80        | 45631 | 2526,056  | 0,7158 | 0,0433 | 9,00E-04 |
| TRAM2         | 46002 | 2538,0585 | 0,6617 | 0,0434 | 9,00E-04 |
| CRTAP         | 6325  | 2537,2059 | 0,6754 | 0,0434 | 9,00E-04 |
| LEF1          | 27113 | 2539,934  | 0,7704 | 0,0434 | 9,00E-04 |
| SP140         | 43759 | 2540,7658 | 0,6601 | 0,0435 | 9,00E-04 |
| CAPN12        | 4389  | 2541,0651 | 0,6627 | 0,0435 | 9,00E-04 |
| TUBGCP4       | 46534 | 2542,9088 | 0,6763 | 0,0435 | 9,00E-04 |
| TAGLN         | 44677 | 2542,7767 | 0,6733 | 0,0436 | 9,00E-04 |
| LOC728014     | 33600 | 2545,1695 | 0,76   | 0,0436 | 9,00E-04 |
| LRSAM1        | 34281 | 2545,536  | 0,6547 | 0,0437 | 9,00E-04 |
| CXCR3         | 6670  | 2550,7279 | 0,6638 | 0,0439 | 9,00E-04 |
| XRCC6BP1      | 47688 | 2550,7027 | 0,6692 | 0,0439 | 9,00E-04 |
| RUSC1         | 41829 | 2555,4518 | 0,6624 | 0,0441 | 9,00E-04 |
| C3ORF17       | 3721  | 2558,1929 | 0,6651 | 0,0441 | 9,00E-04 |
| CTSZ          | 6607  | 2557,9245 | 0,6701 | 0,0441 | 9,00E-04 |
| DBNL          | 6932  | 2558,9651 | 0,6897 | 0,0441 | 9,00E-04 |
| GSDML         | 11441 | 2557,4857 | 0,664  | 0,0442 | 9,00E-04 |
| SOCS1         | 43662 | 2560,35   | 0,6741 | 0,0442 | 9,00E-04 |
| EPSTI1        | 8462  | 2561,0908 | 0,6903 | 0,0442 | 9,00E-04 |
| FN3KRP        | 10074 | 2568,9778 | 0,6612 | 0,0443 | 9,00E-04 |
| RAPGEF1       | 40680 | 2569,4905 | 0,6642 | 0,0443 | 9,00E-04 |
| NLRP1         | 36655 | 2563,7845 | 0,6721 | 0,0443 | 9,00E-04 |
| PHKA2         | 38800 | 2566,6854 | 0,6559 | 0,0444 | 9,00E-04 |
| DKFZP586I1420 | 7412  | 2566,316  | 0,6647 | 0,0444 | 9,00E-04 |
| LCMT1         | 27065 | 2568,1681 | 0,6796 | 0,0444 | 9,00E-04 |
| RMI1          | 41258 | 2564,9356 | 0,6859 | 0,0444 | 9,00E-04 |
| LIN9          | 27267 | 2567,7266 | 0,6865 | 0,0444 | 9,00E-04 |
| UBL4A         | 46741 | 2575,2226 | 0,6756 | 0,0446 | 9,00E-04 |
| ZSCAN16       | 48757 | 2577,1162 | 0,6633 | 0,0447 | 9,00E-04 |
| HS.137078     | 13105 | 2580,2662 | 0,6847 | 0,0448 | 9,00E-04 |
| CPEB2         | 6162  | 2581,3213 | 0,6571 | 0,0449 | 9,00E-04 |
| CCDC84        | 4730  | 2581,6546 | 0,6761 | 0,0449 | 9,00E-04 |
| HS.126768     | 12656 | 2583,6773 | 0,6706 | 0,045  | 9,00E-04 |
| IL28RA        | 25476 | 2584,0893 | 0,6706 | 0,045  | 9,00E-04 |
| LOC653383     | 33175 | 2583,0585 | 0,673  | 0,045  | 9,00E-04 |
| WDSUB1        | 47490 | 2585,9215 | 0,6836 | 0,0451 | 0,001    |
| TP53AP1       | 45881 | 2587,4341 | 0,6882 | 0,0451 | 0,001    |
| CENTB1        | 5312  | 2591,8815 | 0,6487 | 0,0454 | 0,001    |
| LOC197135     | 27556 | 2592,5768 | 0,6529 | 0,0454 | 0,001    |

|           |       |           |        |        |        |
|-----------|-------|-----------|--------|--------|--------|
| MED25     | 34980 | 2592,5406 | 0,6607 | 0,0454 | 0,001  |
| MPHOSPH8  | 35544 | 2593,5813 | 0,6631 | 0,0454 | 0,001  |
| HS.371060 | 15243 | 2594,1086 | 0,6666 | 0,0454 | 0,001  |
| ZNF500    | 48398 | 2591,4474 | 0,6709 | 0,0454 | 0,001  |
| CUGBP2    | 6622  | 2597,3308 | 0,6535 | 0,0456 | 0,001  |
| CCR6      | 4866  | 2599,0556 | 0,6967 | 0,0456 | 0,001  |
| PTP4A2    | 40237 | 2600,672  | 0,6734 | 0,0457 | 0,001  |
| LOC729008 | 33754 | 2598,9842 | 0,6886 | 0,0457 | 0,001  |
| TRADD     | 45970 | 2601,0556 | 0,692  | 0,0457 | 0,001  |
| FKBP15    | 9508  | 2603,8103 | 0,6756 | 0,0458 | 0,001  |
| TUBGCP2   | 46532 | 2607,3454 | 0,6635 | 0,0459 | 0,001  |
| PSAP      | 40016 | 2607,3438 | 0,6715 | 0,046  | 0,001  |
| IL13RA1   | 25375 | 2606,6866 | 0,6885 | 0,046  | 0,001  |
| ZNF589    | 48498 | 2611,5017 | 0,6688 | 0,0461 | 0,001  |
| GPSM3     | 11295 | 2610,7698 | 0,6718 | 0,0461 | 0,001  |
| ZNF30     | 48218 | 2614,6306 | 0,6678 | 0,0464 | 0,001  |
| ISCU      | 25719 | 2619,3697 | 0,6748 | 0,0467 | 0,001  |
| NAT6      | 36212 | 2619,3136 | 0,6782 | 0,0467 | 0,001  |
| SLFN13    | 43323 | 2624,3879 | 0,6812 | 0,0469 | 0,001  |
| BSCL2     | 2545  | 2625,3034 | 0,6666 | 0,047  | 0,001  |
| GOLGA8B   | 11042 | 2633,8387 | 0,6772 | 0,0473 | 0,001  |
| CCDC130   | 4610  | 2633,3681 | 0,6792 | 0,0473 | 0,001  |
| AADAACL1  | 34    | 2632,9794 | 0,6875 | 0,0473 | 0,001  |
| NMI       | 36698 | 2634,1977 | 0,6882 | 0,0473 | 0,001  |
| TOP1MT    | 45856 | 2632,8355 | 0,6714 | 0,0474 | 0,001  |
| PCMT1     | 38366 | 2636,7304 | 0,6855 | 0,0474 | 0,001  |
| PAFAH1B3  | 38010 | 2636,9958 | 0,6981 | 0,0474 | 0,001  |
| CKAP2     | 5621  | 2638,3433 | 0,6615 | 0,0475 | 0,001  |
| GAK       | 10487 | 2640,0407 | 0,6665 | 0,0477 | 0,001  |
| QRICH1    | 40430 | 2641,0859 | 0,6684 | 0,0477 | 0,001  |
| LRRC8D    | 34253 | 2643,4284 | 0,6679 | 0,0478 | 0,001  |
| ZKSCAN4   | 47994 | 2645,6872 | 0,6762 | 0,0478 | 0,001  |
| MTIF3     | 35855 | 2645,6123 | 0,691  | 0,0478 | 0,001  |
| GPR18     | 11211 | 2648,6441 | 0,6467 | 0,048  | 0,0011 |
| AP1G2     | 1216  | 2647,9111 | 0,6658 | 0,048  | 0,001  |
| KIAA0892  | 26275 | 2652,0205 | 0,6623 | 0,0481 | 0,0011 |
| PTPLAD1   | 40252 | 2652,3689 | 0,6843 | 0,0481 | 0,0011 |
| ABCC5     | 114   | 2651,7523 | 0,6793 | 0,0482 | 0,0011 |
| SLC10A7   | 42787 | 2655,0175 | 0,6867 | 0,0482 | 0,0011 |
| CDK5RAP3  | 5181  | 2654,0693 | 0,6945 | 0,0482 | 0,0011 |
| PLOD3     | 39190 | 2657,3753 | 0,6717 | 0,0483 | 0,0011 |
| LETMD1    | 27146 | 2659,3829 | 0,6797 | 0,0483 | 0,0011 |
| CRLF3     | 6301  | 2661,1667 | 0,6863 | 0,0483 | 0,0011 |
| UBE2L6    | 46703 | 2661,6181 | 0,6863 | 0,0483 | 0,0011 |
| LHFPL2    | 27187 | 2660,9889 | 0,6706 | 0,0484 | 0,0011 |
| ABHD8     | 174   | 2665,8177 | 0,6653 | 0,0485 | 0,0011 |
| KTELC1    | 26901 | 2665,0403 | 0,6671 | 0,0485 | 0,0011 |

|           |       |           |        |        |        |
|-----------|-------|-----------|--------|--------|--------|
| PIGS      | 38881 | 2664,4753 | 0,69   | 0,0485 | 0,0011 |
| NISCH     | 36600 | 2667,2966 | 0,6589 | 0,0486 | 0,0011 |
| HS.576106 | 23379 | 2669,8752 | 0,6629 | 0,0486 | 0,0011 |
| CDC16     | 5060  | 2667,3401 | 0,6702 | 0,0486 | 0,0011 |
| TSHZ1     | 46288 | 2669,7091 | 0,6715 | 0,0487 | 0,0011 |
| SHMT1     | 42651 | 2668,794  | 0,6741 | 0,0487 | 0,0011 |
| TMSB10    | 45697 | 2673,145  | 0,6783 | 0,0487 | 0,0011 |
| ZNF517    | 48413 | 2668,8494 | 0,6856 | 0,0487 | 0,0011 |
| ZNF510    | 48404 | 2671,7624 | 0,6949 | 0,0487 | 0,0011 |
| FAM46A    | 8962  | 2671,0272 | 0,837  | 0,0487 | 0,0011 |
| EIF3F     | 8199  | 2678,393  | 0,6709 | 0,0491 | 0,0011 |
| PTPRO     | 40316 | 2680,8668 | 0,6589 | 0,0492 | 0,0011 |
| C11ORF17  | 2748  | 2683,6385 | 0,6608 | 0,0493 | 0,0011 |
| ZBTB4     | 47809 | 2684,8234 | 0,6545 | 0,0494 | 0,0011 |
| HS.475334 | 16197 | 2686,7913 | 0,6699 | 0,0495 | 0,0011 |

**RP analysis 24h**

|           | <b>Upregulated</b> |          |                    |     |         |
|-----------|--------------------|----------|--------------------|-----|---------|
|           | gene.index         | RP/Rsum  | FC:(class1/class2) | pfp | P.value |
| CCL4L2    | 4787               | 11,5808  | 8,7435             | 0   | 0       |
| CCL4L1    | 4786               | 25,6663  | 7,6943             | 0   | 0       |
| DDIT4     | 7028               | 25,5553  | 5,5857             | 0   | 0       |
| TRIB3     | 46044              | 26,738   | 5,1818             | 0   | 0       |
| RGS1      | 41117              | 40,5178  | 5,0846             | 0   | 0       |
| SLC7A5    | 43262              | 43,8047  | 4,5674             | 0   | 0       |
| CCL3      | 4780               | 102,9678 | 4,1414             | 0   | 0       |
| GZMB      | 11600              | 102,0556 | 4,0722             | 0   | 0       |
| MTHFD2    | 35846              | 61,9732  | 4,0213             | 0   | 0       |
| CCL3L1    | 4781               | 133,9742 | 3,8379             | 0   | 0       |
| CCL3L1    | 4782               | 140,4172 | 3,8229             | 0   | 0       |
| CCL3L3    | 4784               | 131,2426 | 3,7966             | 0   | 0       |
| MGC4677   | 35242              | 73,2208  | 3,6872             | 0   | 0       |
| MYC       | 35989              | 91,7037  | 3,4237             | 0   | 0       |
| C20ORF100 | 3469               | 155,0222 | 3,3732             | 0   | 0       |
| IGSF3     | 25325              | 154,6975 | 3,3299             | 0   | 0       |
| PSAT1     | 40018              | 138,6356 | 3,2664             | 0   | 0       |
| FAM152B   | 8873               | 100,3335 | 3,2625             | 0   | 0       |
| CD1C      | 4914               | 114,4133 | 3,1973             | 0   | 0       |
| DBN1      | 6926               | 102,1153 | 3,195              | 0   | 0       |
| RCAN1     | 40906              | 121,2957 | 3,1887             | 0   | 0       |
| MTHFD1L   | 35845              | 115,1331 | 3,1865             | 0   | 0       |
| OAS3      | 37203              | 101,7614 | 3,1506             | 0   | 0       |
| ADM       | 542                | 156,1252 | 3,1057             | 0   | 0       |
| LRRC32    | 34202              | 151,8198 | 3,0821             | 0   | 0       |
| BATF3     | 2173               | 143,0287 | 3,0711             | 0   | 0       |
| SLC1A5    | 42858              | 132,8707 | 3,0381             | 0   | 0       |

|           |       |          |        |   |   |
|-----------|-------|----------|--------|---|---|
| IL4I1     | 25493 | 209,4351 | 2,9918 | 0 | 0 |
| SUSD1     | 44469 | 189,8096 | 2,9282 | 0 | 0 |
| MTHFD2    | 35848 | 152,0143 | 2,9181 | 0 | 0 |
| TNFRSF4   | 45752 | 260,954  | 2,9083 | 0 | 0 |
| GALR2     | 10536 | 132,7895 | 2,8834 | 0 | 0 |
| LILRB4    | 27235 | 185,364  | 2,84   | 0 | 0 |
| MYC       | 35990 | 152,1715 | 2,8199 | 0 | 0 |
| PHACTR1   | 38731 | 169,6765 | 2,7854 | 0 | 0 |
| SERPINE2  | 42408 | 234,8295 | 2,7641 | 0 | 0 |
| SLC43A3   | 43161 | 135,2445 | 2,7602 | 0 | 0 |
| NME1      | 36681 | 169,1077 | 2,7098 | 0 | 0 |
| UCK2      | 46791 | 144,7624 | 2,7057 | 0 | 0 |
| NPM3      | 36854 | 156,5415 | 2,704  | 0 | 0 |
| OAS1      | 37196 | 174,751  | 2,6969 | 0 | 0 |
| DUSP4     | 7889  | 156,3804 | 2,681  | 0 | 0 |
| RAMP1     | 40643 | 188,5366 | 2,6778 | 0 | 0 |
| ATF5      | 1777  | 252,2661 | 2,6303 | 0 | 0 |
| NAMPT     | 36156 | 173,1052 | 2,6254 | 0 | 0 |
| GRAMD4    | 11314 | 237,614  | 2,6128 | 0 | 0 |
| GFI1      | 10716 | 266,2172 | 2,5836 | 0 | 0 |
| TNFRSF9   | 45759 | 306,4641 | 2,568  | 0 | 0 |
| TNFRSF18  | 45741 | 361,3634 | 2,5633 | 0 | 0 |
| TNFRSF18  | 45742 | 288,1148 | 2,5564 | 0 | 0 |
| EGR1      | 8140  | 181,1132 | 2,5545 | 0 | 0 |
| PPP1R14B  | 39582 | 224,0941 | 2,5383 | 0 | 0 |
| FABP5     | 8714  | 203,4045 | 2,5366 | 0 | 0 |
| NOLC1     | 36760 | 184,0117 | 2,5364 | 0 | 0 |
| RCN1      | 40922 | 265,1276 | 2,5356 | 0 | 0 |
| GALE      | 10497 | 197,7251 | 2,5333 | 0 | 0 |
| RPS7      | 41691 | 223,9893 | 2,5112 | 0 | 0 |
| GOT1      | 11070 | 213,984  | 2,4593 | 0 | 0 |
| DUSP2     | 7876  | 217,8625 | 2,4304 | 0 | 0 |
| RPS7      | 41690 | 269,3104 | 2,4282 | 0 | 0 |
| IGSF3     | 25326 | 368,5483 | 2,4244 | 0 | 0 |
| ASNS      | 1723  | 237,0598 | 2,4216 | 0 | 0 |
| LOC399942 | 28337 | 371,402  | 2,4115 | 0 | 0 |
| UCHL1     | 46785 | 343,7115 | 2,4112 | 0 | 0 |
| CORO6     | 6110  | 288,6331 | 2,4007 | 0 | 0 |
| CARD9     | 4429  | 295,3633 | 2,3986 | 0 | 0 |
| NAMPT     | 36157 | 221,2983 | 2,3921 | 0 | 0 |
| ACP5      | 291   | 303,9432 | 2,3779 | 0 | 0 |
| PRR6      | 39972 | 272,4763 | 2,3744 | 0 | 0 |
| UBTD1     | 46765 | 287,0154 | 2,3743 | 0 | 0 |
| GAPDH     | 10549 | 310,5165 | 2,3718 | 0 | 0 |
| CCND2     | 4811  | 442,6444 | 2,3706 | 0 | 0 |
| FASN      | 9140  | 305,4847 | 2,3658 | 0 | 0 |
| FERMT3    | 9373  | 234,7694 | 2,3654 | 0 | 0 |

|           |       |          |        |   |   |
|-----------|-------|----------|--------|---|---|
| XBP1      | 47636 | 282,3122 | 2,3602 | 0 | 0 |
| RPL29     | 41546 | 242,9078 | 2,3471 | 0 | 0 |
| C19ORF48  | 3223  | 302,074  | 2,3436 | 0 | 0 |
| SRM       | 44062 | 241,4225 | 2,3431 | 0 | 0 |
| NME1      | 36683 | 287,0517 | 2,337  | 0 | 0 |
| CHST7     | 5575  | 327,0092 | 2,3362 | 0 | 0 |
| WARS      | 47320 | 395,69   | 2,3356 | 0 | 0 |
| NR4A2     | 36922 | 301,8126 | 2,3313 | 0 | 0 |
| SLC43A3   | 43163 | 230,9937 | 2,3263 | 0 | 0 |
| MTP18     | 35889 | 276,3139 | 2,3081 | 0 | 0 |
| GARS      | 10560 | 300,7429 | 2,2951 | 0 | 0 |
| RRAGD     | 41709 | 315,7747 | 2,2925 | 0 | 0 |
| RPL29     | 41545 | 287,9684 | 2,2918 | 0 | 0 |
| SESN2     | 42424 | 267,0106 | 2,2916 | 0 | 0 |
| NEK6      | 36436 | 290,9181 | 2,2854 | 0 | 0 |
| RYR1      | 41856 | 306,7034 | 2,2813 | 0 | 0 |
| ADCY3     | 500   | 406,4817 | 2,2804 | 0 | 0 |
| GM2A      | 10927 | 389,5312 | 2,2537 | 0 | 0 |
| ENO1      | 8344  | 300,8191 | 2,2533 | 0 | 0 |
| CCDC86    | 4734  | 279,9345 | 2,2483 | 0 | 0 |
| GAPDH     | 10551 | 362,0361 | 2,2331 | 0 | 0 |
| RPS15     | 41623 | 346,5413 | 2,2189 | 0 | 0 |
| PIM3      | 38925 | 283,3183 | 2,2104 | 0 | 0 |
| GLA       | 10846 | 292,0858 | 2,1999 | 0 | 0 |
| PYCR1     | 40401 | 339,9643 | 2,1816 | 0 | 0 |
| MRPL12    | 35615 | 323,5279 | 2,1752 | 0 | 0 |
| LONP1     | 34077 | 344,2596 | 2,1725 | 0 | 0 |
| TXN       | 46569 | 369,3176 | 2,1712 | 0 | 0 |
| PRDX4     | 39766 | 320,0722 | 2,17   | 0 | 0 |
| PAICS     | 38025 | 341,925  | 2,1602 | 0 | 0 |
| RPS24     | 41637 | 389,2143 | 2,1539 | 0 | 0 |
| RCAN1     | 40904 | 345,2319 | 2,1531 | 0 | 0 |
| PAICS     | 38027 | 345,6453 | 2,1518 | 0 | 0 |
| CTPS      | 6571  | 352,0815 | 2,1464 | 0 | 0 |
| JTV1      | 25884 | 359,9149 | 2,1399 | 0 | 0 |
| SLC3A2    | 43151 | 447,6522 | 2,1364 | 0 | 0 |
| LDHA      | 27091 | 379,5745 | 2,1333 | 0 | 0 |
| BACE2     | 2105  | 301,2011 | 2,1322 | 0 | 0 |
| LOC648024 | 31452 | 399,6707 | 2,1317 | 0 | 0 |
| FERMT3    | 9374  | 367,0058 | 2,125  | 0 | 0 |
| OAS1      | 37195 | 403,5933 | 2,1154 | 0 | 0 |
| ACOT7     | 275   | 354,7234 | 2,1122 | 0 | 0 |
| IARS      | 25139 | 407,9126 | 2,112  | 0 | 0 |
| BYSL      | 2627  | 401,5183 | 2,1116 | 0 | 0 |
| GAPDH     | 10550 | 443,1591 | 2,1103 | 0 | 0 |
| PCK2      | 38362 | 450,8306 | 2,1097 | 0 | 0 |
| ENTPD1    | 8369  | 345,8679 | 2,0976 | 0 | 0 |

|           |       |          |        |          |   |
|-----------|-------|----------|--------|----------|---|
| PHGDH     | 38797 | 320,2878 | 2,0968 | 0        | 0 |
| TRAF1     | 45973 | 420,0937 | 2,095  | 0        | 0 |
| SLC3A2    | 43149 | 450,6377 | 2,0866 | 0        | 0 |
| ARPC5L    | 1595  | 432,885  | 2,0758 | 0        | 0 |
| TXN       | 46568 | 457,3999 | 2,0665 | 0        | 0 |
| XBP1      | 47637 | 449,7102 | 2,0664 | 0        | 0 |
| HNRNPAB   | 12113 | 412,0785 | 2,0598 | 0        | 0 |
| ZNF593    | 48501 | 360,9357 | 2,0538 | 0        | 0 |
| PSMB2     | 40085 | 430,8782 | 2,0499 | 0        | 0 |
| RRP12     | 41726 | 421,5345 | 2,0459 | 0        | 0 |
| PCK2      | 38361 | 460,4322 | 2,0438 | 0        | 0 |
| C17ORF91  | 3149  | 451,4828 | 2,0314 | 0        | 0 |
| C17ORF58  | 3114  | 401,0442 | 2,0186 | 0        | 0 |
| SLC25A4   | 42964 | 424,72   | 2,0067 | 0        | 0 |
| MTP18     | 35887 | 434,7314 | 2,0061 | 0        | 0 |
| ACOT9     | 281   | 439,0452 | 2,0052 | 0        | 0 |
| NOLA1     | 36755 | 428,9486 | 2,0047 | 0        | 0 |
| ASCC1     | 1695  | 405,8955 | 2,0003 | 0        | 0 |
| HSPC111   | 25037 | 465,2676 | 1,9894 | 0        | 0 |
| SDF2L1    | 42145 | 458,5638 | 1,986  | 0        | 0 |
| ARMET     | 1577  | 460,0875 | 1,9521 | 0        | 0 |
| HS.25892  | 14514 | 455,9527 | 1,9499 | 0        | 0 |
| CST7      | 6461  | 478,3647 | 2,2668 | 1,00E-04 | 0 |
| CTH       | 6537  | 480,6172 | 2,2401 | 1,00E-04 | 0 |
| SLC6A9    | 43249 | 472,6342 | 2,211  | 1,00E-04 | 0 |
| CBS       | 4534  | 471,8061 | 2,2081 | 1,00E-04 | 0 |
| CCL3L1    | 4783  | 491,5258 | 2,203  | 1,00E-04 | 0 |
| GYPC      | 11591 | 484,7207 | 2,1723 | 1,00E-04 | 0 |
| GYPC      | 11590 | 474,1834 | 2,1692 | 1,00E-04 | 0 |
| MYCN      | 35997 | 523,4124 | 2,1132 | 1,00E-04 | 0 |
| METTL1    | 35060 | 484,846  | 2,0896 | 1,00E-04 | 0 |
| FKBP4     | 9519  | 479,0614 | 2,0865 | 1,00E-04 | 0 |
| EZH2      | 8674  | 475,3545 | 2,0692 | 1,00E-04 | 0 |
| IL21R     | 25451 | 519,2534 | 2,0643 | 1,00E-04 | 0 |
| RPL8      | 41589 | 492,9831 | 2,0594 | 1,00E-04 | 0 |
| LY9       | 34373 | 516,0197 | 2,0264 | 1,00E-04 | 0 |
| EGR2      | 8141  | 481,7431 | 2,026  | 1,00E-04 | 0 |
| C19ORF48  | 3222  | 499,5806 | 2,0242 | 1,00E-04 | 0 |
| RAB20     | 40468 | 471,8313 | 2,0232 | 1,00E-04 | 0 |
| RPL6      | 41583 | 488,9115 | 1,9966 | 1,00E-04 | 0 |
| OAS1      | 37197 | 512,2759 | 1,9919 | 1,00E-04 | 0 |
| CD58      | 4989  | 502,4597 | 1,9881 | 1,00E-04 | 0 |
| ADAM15    | 404   | 468,9438 | 1,9853 | 1,00E-04 | 0 |
| LOC732007 | 34005 | 518,1739 | 1,9765 | 1,00E-04 | 0 |
| CKS2      | 5638  | 523,062  | 1,9677 | 1,00E-04 | 0 |
| C17ORF58  | 3112  | 476,5574 | 1,9315 | 1,00E-04 | 0 |
| EBNA1BP2  | 7988  | 480,215  | 1,9303 | 1,00E-04 | 0 |



|           |       |          |        |          |   |
|-----------|-------|----------|--------|----------|---|
| C17ORF58  | 3113  | 470,0258 | 1,9269 | 1,00E-04 | 0 |
| CYCSL1    | 6745  | 522,1889 | 1,901  | 1,00E-04 | 0 |
| LYAR      | 34378 | 520,6663 | 1,8985 | 1,00E-04 | 0 |
| BACE2     | 2104  | 511,0598 | 1,8604 | 1,00E-04 | 0 |
| HOMER1    | 12151 | 498,8201 | 1,8565 | 1,00E-04 | 0 |
| CCND2     | 4812  | 555,5529 | 2,2152 | 2,00E-04 | 0 |
| WARS      | 47321 | 539,7112 | 2,1103 | 2,00E-04 | 0 |
| CDK4      | 5169  | 549,8005 | 2,0231 | 2,00E-04 | 0 |
| LOC286016 | 27801 | 562,7283 | 2,0131 | 2,00E-04 | 0 |
| LOC644774 | 30320 | 535,3023 | 1,9933 | 2,00E-04 | 0 |
| PGAM4     | 38679 | 541,297  | 1,9665 | 2,00E-04 | 0 |
| LRP8      | 34169 | 529,4704 | 1,9583 | 2,00E-04 | 0 |
| DUSP10    | 7860  | 531,9805 | 1,93   | 2,00E-04 | 0 |
| GNPDA1    | 11012 | 528,0763 | 1,9278 | 2,00E-04 | 0 |
| PRKCQ     | 39845 | 550,8815 | 1,9267 | 2,00E-04 | 0 |
| PGAM1     | 38675 | 542,5264 | 1,9197 | 2,00E-04 | 0 |
| SNORA33   | 43517 | 535,7035 | 1,9139 | 2,00E-04 | 0 |
| WDR12     | 47365 | 553,0044 | 1,894  | 2,00E-04 | 0 |
| WDR12     | 47366 | 546,1833 | 1,8882 | 2,00E-04 | 0 |
| SLC25A4   | 42963 | 551,9669 | 1,8709 | 2,00E-04 | 0 |
| MTP18     | 35888 | 556,4524 | 1,8564 | 2,00E-04 | 0 |
| LYAR      | 34377 | 524,2964 | 1,8562 | 2,00E-04 | 0 |
| PSMD12    | 40119 | 550,485  | 1,8392 | 2,00E-04 | 0 |
| SIRPA     | 42720 | 565,0162 | 2,0963 | 3,00E-04 | 0 |
| FOSB      | 10103 | 599,9839 | 2,0928 | 3,00E-04 | 0 |
| PKM2      | 39010 | 565,6353 | 2,0277 | 3,00E-04 | 0 |
| LOC653506 | 33238 | 616,4894 | 1,9768 | 3,00E-04 | 0 |
| ARID3A    | 1492  | 616,1631 | 1,9727 | 3,00E-04 | 0 |
| IL2RB     | 25481 | 603,9501 | 1,9645 | 3,00E-04 | 0 |
| LOC653888 | 33414 | 610,7809 | 1,9308 | 3,00E-04 | 0 |
| SARS      | 41960 | 576,2385 | 1,9272 | 3,00E-04 | 0 |
| SGK       | 42540 | 588,4991 | 1,9169 | 3,00E-04 | 0 |
| CD58      | 4990  | 590,5428 | 1,9009 | 3,00E-04 | 0 |
| C3ORF26   | 3735  | 568,8651 | 1,8933 | 3,00E-04 | 0 |
| PRMT5     | 39887 | 570,8546 | 1,8928 | 3,00E-04 | 0 |
| NR4A2     | 36921 | 592,1921 | 1,8913 | 3,00E-04 | 0 |
| CKS2      | 5637  | 619,7688 | 1,8825 | 3,00E-04 | 0 |
| EZH2      | 8673  | 582,6023 | 1,8817 | 3,00E-04 | 0 |
| IMPDH2    | 25546 | 620,3669 | 1,8633 | 3,00E-04 | 0 |
| TIMM44    | 45261 | 606,5982 | 1,8551 | 3,00E-04 | 0 |
| ISOC2     | 25731 | 605,3661 | 1,8487 | 3,00E-04 | 0 |
| LRRC33    | 34203 | 627,9549 | 1,846  | 3,00E-04 | 0 |
| PELO      | 38599 | 627,6458 | 1,8414 | 3,00E-04 | 0 |
| UBQLN1    | 46754 | 590,0308 | 1,8191 | 3,00E-04 | 0 |
| AK2       | 725   | 611,1634 | 1,7888 | 3,00E-04 | 0 |
| BCAT1     | 2226  | 630,1164 | 2,0799 | 4,00E-04 | 0 |
| KCNK12    | 26043 | 650,9881 | 1,9579 | 4,00E-04 | 0 |

|           |       |          |        |          |   |
|-----------|-------|----------|--------|----------|---|
| HMGA1     | 12062 | 651,2896 | 1,9501 | 4,00E-04 | 0 |
| TPI1      | 45915 | 643,5919 | 1,9403 | 4,00E-04 | 0 |
| YARS      | 47703 | 649,15   | 1,9364 | 4,00E-04 | 0 |
| MIF       | 35326 | 636,4979 | 1,9014 | 4,00E-04 | 0 |
| ALDOA     | 855   | 636,4464 | 1,8743 | 4,00E-04 | 0 |
| MRPS7     | 35721 | 657,1763 | 1,8473 | 4,00E-04 | 0 |
| TOMM40    | 45846 | 629,7603 | 1,8446 | 4,00E-04 | 0 |
| BOP1      | 2463  | 639,5288 | 1,8428 | 4,00E-04 | 0 |
| MRTO4     | 35728 | 645,9318 | 1,8247 | 4,00E-04 | 0 |
| IFRD2     | 25259 | 653,8534 | 1,7899 | 4,00E-04 | 0 |
| CCL22     | 4769  | 692,1963 | 1,9915 | 5,00E-04 | 0 |
| NFE2L1    | 36502 | 695,2711 | 1,9874 | 5,00E-04 | 0 |
| ASNS      | 1724  | 680,0155 | 1,8963 | 5,00E-04 | 0 |
| GPATCH4   | 11088 | 674,3128 | 1,8919 | 5,00E-04 | 0 |
| PPA1      | 39458 | 662,9724 | 1,8533 | 5,00E-04 | 0 |
| C1QBP     | 3439  | 676,1756 | 1,8503 | 5,00E-04 | 0 |
| IPO4      | 25644 | 675,775  | 1,8431 | 5,00E-04 | 0 |
| HSP90AB1  | 24994 | 682,7466 | 1,8283 | 5,00E-04 | 0 |
| NFKBIE    | 36523 | 693,43   | 1,8278 | 5,00E-04 | 0 |
| ACY1      | 386   | 683,7554 | 1,8115 | 5,00E-04 | 0 |
| MCM6      | 34903 | 663,3964 | 1,8084 | 5,00E-04 | 0 |
| SFXN4     | 42525 | 696,2168 | 1,732  | 5,00E-04 | 0 |
| LOC650215 | 32058 | 706,09   | 1,9376 | 6,00E-04 | 0 |
| SAMSN1    | 41937 | 692,8885 | 1,8899 | 6,00E-04 | 0 |
| PRPF19    | 39926 | 707,4826 | 1,8069 | 6,00E-04 | 0 |
| PTGER4    | 40198 | 703,7791 | 1,7956 | 6,00E-04 | 0 |
| VEGFA     | 47168 | 692,6408 | 1,792  | 6,00E-04 | 0 |
| TUBA1C    | 46501 | 735,0732 | 1,9913 | 7,00E-04 | 0 |
| FAM57A    | 8992  | 712,2816 | 1,8981 | 7,00E-04 | 0 |
| PLEK      | 39121 | 721,4873 | 1,8933 | 7,00E-04 | 0 |
| TUBB2C    | 46516 | 712,4362 | 1,8329 | 7,00E-04 | 0 |
| WDR4      | 47408 | 711,7652 | 1,7894 | 7,00E-04 | 0 |
| LOC650832 | 32232 | 733,9784 | 1,7677 | 7,00E-04 | 0 |
| PSMB5     | 40088 | 711,2677 | 1,7667 | 7,00E-04 | 0 |
| HSPA9     | 25022 | 722,6112 | 1,7372 | 7,00E-04 | 0 |
| APOD      | 1316  | 720,871  | 1,5132 | 7,00E-04 | 0 |
| TUBB      | 46510 | 783,8324 | 1,9748 | 8,00E-04 | 0 |
| FOS       | 10102 | 759,7968 | 1,9218 | 8,00E-04 | 0 |
| TPI1      | 45914 | 753,3025 | 1,8749 | 8,00E-04 | 0 |
| UBE2F     | 46684 | 781,5174 | 1,86   | 8,00E-04 | 0 |
| HYOU1     | 25133 | 768,7565 | 1,8293 | 8,00E-04 | 0 |
| HNRNPAB   | 12114 | 773,445  | 1,8209 | 8,00E-04 | 0 |
| ACOX3     | 286   | 725,1657 | 1,8027 | 8,00E-04 | 0 |
| DDX21     | 7068  | 727,4917 | 1,8018 | 8,00E-04 | 0 |
| PRMT5     | 39888 | 775,0149 | 1,7999 | 8,00E-04 | 0 |
| PGAM1     | 38674 | 723,8513 | 1,7921 | 8,00E-04 | 0 |
| ABCB6     | 91    | 762,3996 | 1,791  | 8,00E-04 | 0 |

|           |       |          |        |          |   |
|-----------|-------|----------|--------|----------|---|
| TALDO1    | 44689 | 760,9221 | 1,787  | 8,00E-04 | 0 |
| PEA15     | 38582 | 782,7147 | 1,7857 | 8,00E-04 | 0 |
| HAGHL     | 11646 | 748,0403 | 1,7839 | 8,00E-04 | 0 |
| NOLA2     | 36757 | 769,9792 | 1,78   | 8,00E-04 | 0 |
| TRAP1     | 46003 | 760,8324 | 1,7789 | 8,00E-04 | 0 |
| PRDX1     | 39759 | 745,0308 | 1,749  | 8,00E-04 | 0 |
| DCUN1D5   | 7002  | 758,4923 | 1,7288 | 8,00E-04 | 0 |
| RRP15     | 41727 | 782,2348 | 1,7268 | 8,00E-04 | 0 |
| SLAMF7    | 42774 | 762,7884 | 1,7215 | 8,00E-04 | 0 |
| PSMD8     | 40132 | 787,3113 | 1,7214 | 8,00E-04 | 0 |
| NIP7      | 36589 | 749,5985 | 1,7181 | 8,00E-04 | 0 |
| NME1      | 36682 | 733,57   | 1,7156 | 8,00E-04 | 0 |
| LOC731049 | 33952 | 747,413  | 1,6999 | 8,00E-04 | 0 |
| RPL34     | 41559 | 797,9589 | 1,8438 | 9,00E-04 | 0 |
| PGAM4     | 38680 | 799,2918 | 1,8414 | 9,00E-04 | 0 |
| AK2       | 723   | 791,615  | 1,7738 | 9,00E-04 | 0 |
| SRXN1     | 44089 | 801,9715 | 1,7647 | 9,00E-04 | 0 |
| PGAM4     | 38678 | 795,3471 | 1,7618 | 9,00E-04 | 0 |
| CD151     | 4901  | 772,0649 | 1,7451 | 9,00E-04 | 0 |
| PEMT      | 38601 | 796,7497 | 1,7385 | 9,00E-04 | 0 |
| NOLA1     | 36756 | 803,3059 | 1,7362 | 9,00E-04 | 0 |
| TNFSF13B  | 45769 | 797,2677 | 1,7307 | 9,00E-04 | 0 |
| PDSS1     | 38556 | 790,0508 | 1,7186 | 9,00E-04 | 0 |
| OPRS1     | 37339 | 772,8199 | 1,6932 | 9,00E-04 | 0 |
| CCDC90A   | 4740  | 799,8625 | 1,691  | 9,00E-04 | 0 |
| UHL5      | 46787 | 791,0756 | 1,688  | 9,00E-04 | 0 |
| RPS21     | 41635 | 822,2133 | 1,7956 | 0,001    | 0 |
| EIF4A1    | 8208  | 833,7316 | 1,7877 | 0,001    | 0 |
| ANKRD37   | 1121  | 829,5809 | 1,7816 | 0,001    | 0 |
| HSPD1     | 25044 | 817,312  | 1,7718 | 0,001    | 0 |
| PPP1R15A  | 39585 | 827,719  | 1,7708 | 0,001    | 0 |
| PRNP      | 39895 | 820,9433 | 1,7639 | 0,001    | 0 |
| SLC25A19  | 42926 | 820,2646 | 1,7608 | 0,001    | 0 |
| HNRNPAB   | 12115 | 813,4221 | 1,7561 | 0,001    | 0 |
| DCXR      | 7006  | 825,2465 | 1,7297 | 0,001    | 0 |
| ATP1B3    | 1854  | 823,1197 | 1,7174 | 0,001    | 0 |
| NEU1      | 36454 | 833,6822 | 1,7128 | 0,001    | 0 |
| ACOT7     | 277   | 832,372  | 1,705  | 0,001    | 0 |
| NDUFAF2   | 36365 | 815,6106 | 1,6935 | 0,001    | 0 |
| SLC7A1    | 43251 | 848,9279 | 1,8153 | 0,0011   | 0 |
| SLC25A22  | 42932 | 839,1313 | 1,78   | 0,0011   | 0 |
| FKBP2     | 9514  | 837,1227 | 1,7593 | 0,0011   | 0 |
| RNH1      | 41418 | 845,8375 | 1,7515 | 0,0011   | 0 |
| PRMT3     | 39886 | 849,9474 | 1,6745 | 0,0011   | 0 |
| HMBS      | 12050 | 852,5185 | 1,7275 | 0,0012   | 0 |
| TUBA1A    | 46498 | 877,2215 | 1,9311 | 0,0013   | 0 |
| DUSP5     | 7890  | 882,2129 | 1,7846 | 0,0013   | 0 |

|            |       |          |        |        |   |
|------------|-------|----------|--------|--------|---|
| LOC643300  | 29632 | 877,6612 | 1,7591 | 0,0013 | 0 |
| PRMT1      | 39881 | 862,5162 | 1,7566 | 0,0013 | 0 |
| PSPH       | 40151 | 864,1028 | 1,7459 | 0,0013 | 0 |
| SAP30      | 41941 | 867,5344 | 1,7115 | 0,0013 | 0 |
| RUVBL1     | 41834 | 863,9752 | 1,7086 | 0,0013 | 0 |
| SNHG3-RCC1 | 43505 | 866,2988 | 1,6673 | 0,0013 | 0 |
| NETO2      | 36453 | 861,7245 | 1,6597 | 0,0013 | 0 |
| SIRPA      | 42721 | 896,9534 | 1,7989 | 0,0014 | 0 |
| PGK1       | 38699 | 900,1027 | 1,7449 | 0,0014 | 0 |
| VDAC1      | 47163 | 892,981  | 1,737  | 0,0014 | 0 |
| BCAR3      | 2217  | 887,5895 | 1,7363 | 0,0014 | 0 |
| PUS7       | 40359 | 899,8115 | 1,7309 | 0,0014 | 0 |
| KCNG1      | 25972 | 887,0405 | 1,7279 | 0,0014 | 0 |
| STIP1      | 44291 | 880,5509 | 1,7034 | 0,0014 | 0 |
| C3ORF26    | 3734  | 889,7745 | 1,6975 | 0,0014 | 0 |
| NANS       | 36166 | 881,5745 | 1,6971 | 0,0014 | 0 |
| NUP188     | 37128 | 896,8624 | 1,6864 | 0,0014 | 0 |
| RANGAP1    | 40665 | 882,0445 | 1,6799 | 0,0014 | 0 |
| EGR3       | 8142  | 889,8775 | 1,6746 | 0,0014 | 0 |
| BOLA3      | 2456  | 884,9519 | 1,671  | 0,0014 | 0 |
| ATL3       | 1809  | 891,0036 | 1,6631 | 0,0014 | 0 |
| BXDC1      | 2623  | 901,1748 | 1,637  | 0,0014 | 0 |
| LOC221710  | 27605 | 885,0292 | 1,632  | 0,0014 | 0 |
| HES6       | 11822 | 910,499  | 1,7492 | 0,0015 | 0 |
| C16ORF14   | 3038  | 912,7669 | 1,6938 | 0,0015 | 0 |
| NSMAF      | 36998 | 917,6556 | 1,6812 | 0,0015 | 0 |
| CIRH1A     | 5611  | 909,948  | 1,67   | 0,0015 | 0 |
| WDR43      | 47418 | 915,0316 | 1,6426 | 0,0015 | 0 |
| AARS       | 47    | 923,2066 | 1,8339 | 0,0016 | 0 |
| HOMER2     | 12153 | 927,7559 | 1,73   | 0,0016 | 0 |
| DDIT3      | 7027  | 925,8145 | 1,6886 | 0,0016 | 0 |
| LHFP       | 27185 | 934,4076 | 1,943  | 0,0017 | 0 |
| PSMD3      | 40124 | 934,7753 | 1,6716 | 0,0017 | 0 |
| KDELRL2    | 26139 | 936,9095 | 1,6686 | 0,0017 | 0 |
| RUVBL1     | 41833 | 938,1846 | 1,6535 | 0,0017 | 0 |
| SHMT2      | 42654 | 949,352  | 1,776  | 0,0018 | 0 |
| DPP3       | 7720  | 946,6303 | 1,753  | 0,0018 | 0 |
| GLRX2      | 10888 | 944,0718 | 1,6478 | 0,0018 | 0 |
| HYOU1      | 25132 | 951,4563 | 1,7305 | 0,0019 | 0 |
| METRNL     | 35053 | 963,7437 | 1,7476 | 0,002  | 0 |
| TMEM97     | 45653 | 965,2231 | 1,7157 | 0,002  | 0 |
| CBX6       | 4550  | 962,4639 | 1,675  | 0,002  | 0 |
| SRPRB      | 44080 | 960,0024 | 1,6424 | 0,002  | 0 |
| TGFBR3     | 45122 | 965,1636 | 1,6225 | 0,002  | 0 |
| BZW2       | 2636  | 968,6231 | 1,7071 | 0,0021 | 0 |
| HSPC171    | 25040 | 968,7452 | 1,6627 | 0,0021 | 0 |
| MPP6       | 35556 | 977,6495 | 1,6137 | 0,0021 | 0 |

|           |       |           |        |        |   |
|-----------|-------|-----------|--------|--------|---|
| HLA-DRB6  | 12027 | 977,9206  | 1,4916 | 0,0021 | 0 |
| HS.132448 | 12977 | 989,8519  | 1,7622 | 0,0022 | 0 |
| PLEKHA7   | 39133 | 980,4752  | 1,6985 | 0,0022 | 0 |
| C17ORF79  | 3138  | 981,4557  | 1,6681 | 0,0022 | 0 |
| LOC651816 | 32494 | 986,1762  | 1,642  | 0,0022 | 0 |
| SLC35B1   | 43078 | 991,1379  | 1,6418 | 0,0022 | 0 |
| STX11     | 44361 | 997,7774  | 1,7541 | 0,0023 | 0 |
| TKT       | 45295 | 1001,4143 | 1,7343 | 0,0023 | 0 |
| C6ORF129  | 3888  | 996,8202  | 1,7266 | 0,0023 | 0 |
| MAPKAPK3  | 34724 | 1000,2894 | 1,7115 | 0,0023 | 0 |
| PFKP      | 38658 | 998,3799  | 1,6949 | 0,0023 | 0 |
| FKBP11    | 9505  | 1005,2343 | 1,6588 | 0,0023 | 0 |
| STT3A     | 44356 | 997,8975  | 1,6539 | 0,0023 | 0 |
| GALNT1    | 10508 | 1000,4487 | 1,6438 | 0,0023 | 0 |
| BAG3      | 2116  | 1005,1401 | 1,6328 | 0,0023 | 0 |
| PPIL1     | 39529 | 1008,2824 | 1,6265 | 0,0023 | 0 |
| NFKB1     | 36514 | 1027,8563 | 1,7485 | 0,0024 | 0 |
| LOC647000 | 31120 | 1017,1223 | 1,7073 | 0,0024 | 0 |
| GPI       | 11114 | 1026,4117 | 1,6781 | 0,0024 | 0 |
| C5ORF30   | 3843  | 1012,3144 | 1,6656 | 0,0024 | 0 |
| NAT10     | 36203 | 1020,8331 | 1,6587 | 0,0024 | 0 |
| SFXN1     | 42522 | 1026,0872 | 1,644  | 0,0024 | 0 |
| GPR137B   | 11166 | 1012,8268 | 1,6265 | 0,0024 | 0 |
| CRELD2    | 6269  | 1026,4208 | 1,6261 | 0,0024 | 0 |
| MAFG      | 34473 | 1019,9361 | 1,6227 | 0,0024 | 0 |
| LOC647000 | 31119 | 1032,9214 | 1,8111 | 0,0025 | 0 |
| KIAA0020  | 26162 | 1036,3374 | 1,6832 | 0,0025 | 0 |
| PSMD14    | 40122 | 1030,5516 | 1,6583 | 0,0025 | 0 |
| SDSL      | 42179 | 1046,6892 | 1,7993 | 0,0026 | 0 |
| SNX5      | 43646 | 1049,6895 | 1,7009 | 0,0026 | 0 |
| SLC39A14  | 43132 | 1040,1615 | 1,6658 | 0,0026 | 0 |
| PLOD1     | 39186 | 1050,5106 | 1,6567 | 0,0026 | 0 |
| ODC1      | 37233 | 1042,0138 | 1,6484 | 0,0026 | 0 |
| BRF2      | 2511  | 1044,6727 | 1,6178 | 0,0026 | 0 |
| GNL3      | 11004 | 1049,2288 | 1,6157 | 0,0026 | 0 |
| PDCD5     | 38428 | 1060,4331 | 1,6426 | 0,0027 | 0 |
| PTPRE     | 40304 | 1064,9869 | 1,6742 | 0,0028 | 0 |
| ITGAX     | 25763 | 1062,886  | 1,6309 | 0,0028 | 0 |
| POLR2D    | 39364 | 1062,648  | 1,6011 | 0,0028 | 0 |
| UTP11L    | 47070 | 1078,0688 | 1,6699 | 0,0029 | 0 |
| PCK2      | 38363 | 1079,1884 | 1,6375 | 0,0029 | 0 |
| PAK1IP1   | 38037 | 1084,4762 | 1,6293 | 0,003  | 0 |
| ELL2      | 8275  | 1093,1222 | 1,6712 | 0,0031 | 0 |
| TBC1D7    | 44797 | 1094,2622 | 1,6603 | 0,0031 | 0 |
| STAT3     | 44256 | 1089,256  | 1,641  | 0,0031 | 0 |
| FABP5     | 8715  | 1094,1261 | 1,6388 | 0,0031 | 0 |
| RPL13     | 41515 | 1090,8455 | 1,6045 | 0,0031 | 0 |

|           |       |           |        |        |   |
|-----------|-------|-----------|--------|--------|---|
| NFIL3     | 36512 | 1103,0384 | 1,5838 | 0,0032 | 0 |
| TM6SF1    | 45347 | 1106,0268 | 1,7226 | 0,0033 | 0 |
| GART      | 10562 | 1105,4977 | 1,6688 | 0,0033 | 0 |
| NME2      | 36687 | 1110,0349 | 1,6658 | 0,0033 | 0 |
| ATP1B3    | 1852  | 1110,3948 | 1,6292 | 0,0033 | 0 |
| EEF1B2    | 8061  | 1104,7353 | 1,5921 | 0,0033 | 0 |
| C1ORF19   | 3347  | 1111,4085 | 1,7288 | 0,0034 | 0 |
| NHP2L1    | 36569 | 1112,7985 | 1,5846 | 0,0034 | 0 |
| PKM2      | 39012 | 1120,7792 | 1,6731 | 0,0035 | 0 |
| PDLIM7    | 38538 | 1121,8309 | 1,5729 | 0,0035 | 0 |
| HSPD1     | 25047 | 1128,644  | 1,6968 | 0,0036 | 0 |
| ATOX1     | 1823  | 1124,6867 | 1,6874 | 0,0036 | 0 |
| CGI-96    | 5427  | 1139,4241 | 1,6234 | 0,0036 | 0 |
| EXOSC4    | 8641  | 1138,095  | 1,615  | 0,0036 | 0 |
| SEH1L     | 42236 | 1131,5394 | 1,6036 | 0,0036 | 0 |
| G6PD      | 10398 | 1128,4428 | 1,5823 | 0,0036 | 0 |
| QPCT      | 40424 | 1135,0306 | 1,714  | 0,0037 | 0 |
| LPIN1     | 34117 | 1154,4279 | 1,6894 | 0,0037 | 0 |
| C19ORF10  | 3179  | 1147,0022 | 1,6532 | 0,0037 | 0 |
| ENDOG     | 8341  | 1143,609  | 1,643  | 0,0037 | 0 |
| MAP2K3    | 34621 | 1133,0153 | 1,6171 | 0,0037 | 0 |
| PI4K2A    | 38836 | 1144,8213 | 1,6148 | 0,0037 | 0 |
| KPNA2     | 26712 | 1153,2258 | 1,6645 | 0,0038 | 0 |
| PSMC3     | 40100 | 1159,9127 | 1,6297 | 0,0038 | 0 |
| RENBP     | 40989 | 1153,464  | 1,6184 | 0,0038 | 0 |
| LOC732165 | 34018 | 1164,721  | 1,6999 | 0,0039 | 0 |
| NUP93     | 37149 | 1170,3025 | 1,6686 | 0,004  | 0 |
| VCP       | 47146 | 1168,3753 | 1,6052 | 0,004  | 0 |
| NP        | 36808 | 1172,0829 | 1,7075 | 0,0041 | 0 |
| PRDX1     | 39760 | 1173,2069 | 1,6543 | 0,0041 | 0 |
| BOLA2     | 2455  | 1171,1397 | 1,6463 | 0,0041 | 0 |
| MRPL24    | 35633 | 1186,286  | 1,6211 | 0,0042 | 0 |
| BIRC7     | 2372  | 1185,2368 | 1,6166 | 0,0042 | 0 |
| GUF1      | 11572 | 1193,0142 | 1,5928 | 0,0042 | 0 |
| BEX2      | 2329  | 1184,3321 | 1,451  | 0,0042 | 0 |
| CHCHD6    | 5448  | 1207,2397 | 1,6754 | 0,0043 | 0 |
| EBI3      | 7987  | 1199,8601 | 1,6656 | 0,0043 | 0 |
| NCBP2     | 36287 | 1203,3669 | 1,6431 | 0,0043 | 0 |
| TCEB3     | 44897 | 1199,0828 | 1,633  | 0,0043 | 0 |
| P4HB      | 37971 | 1196,4537 | 1,6106 | 0,0043 | 0 |
| AHCY      | 682   | 1188,3953 | 1,6023 | 0,0043 | 0 |
| EIF4G1    | 8224  | 1216,0525 | 1,5922 | 0,0043 | 0 |
| RYR1      | 41855 | 1200,5518 | 1,5891 | 0,0043 | 0 |
| PFN1      | 38660 | 1197,5095 | 1,5797 | 0,0043 | 0 |
| FAH       | 8730  | 1213,5812 | 1,5793 | 0,0043 | 0 |
| TXNL2     | 46597 | 1208,1015 | 1,5768 | 0,0043 | 0 |
| EIF4EBP1  | 8219  | 1213,6301 | 1,5646 | 0,0043 | 0 |

|           |       |           |        |        |          |
|-----------|-------|-----------|--------|--------|----------|
| NOL14     | 36740 | 1205,2965 | 1,557  | 0,0043 | 0        |
| NME1-NME2 | 36684 | 1196,1755 | 1,5563 | 0,0043 | 0        |
| LONRF3    | 34083 | 1201,1049 | 1,551  | 0,0043 | 0        |
| ITGB2     | 25776 | 1197,7562 | 1,5382 | 0,0043 | 0        |
| HLA-DRB1  | 12022 | 1183,8571 | 1,2992 | 0,0043 | 0        |
| ABCE1     | 134   | 1221,0013 | 1,6219 | 0,0044 | 0        |
| ALKBH2    | 882   | 1225,0402 | 1,6405 | 0,0045 | 0        |
| PHEX      | 38748 | 1238,7805 | 1,7199 | 0,0046 | 0        |
| PER2      | 38609 | 1226,8165 | 1,6011 | 0,0046 | 0        |
| GART      | 10561 | 1234,3887 | 1,5968 | 0,0046 | 0        |
| AMY1A     | 981   | 1241,2738 | 1,5845 | 0,0046 | 0        |
| C21ORF70  | 3624  | 1237,9087 | 1,5845 | 0,0046 | 0        |
| MAP1LC3B  | 34609 | 1237,7244 | 1,582  | 0,0046 | 0        |
| ECE2      | 7996  | 1232,3816 | 1,5701 | 0,0046 | 0        |
| PDSS1     | 38555 | 1231,9883 | 1,5689 | 0,0046 | 0        |
| YRDC      | 47736 | 1230,1944 | 1,5595 | 0,0046 | 0        |
| ZNF259    | 48170 | 1229,3786 | 1,548  | 0,0046 | 0        |
| PKM2      | 39011 | 1246,0441 | 1,6773 | 0,0047 | 0        |
| PGK1      | 38700 | 1253,5317 | 1,6474 | 0,0047 | 0        |
| SCD       | 42024 | 1248,5184 | 1,6273 | 0,0047 | 0        |
| XTP3TPA   | 47694 | 1245,4256 | 1,6222 | 0,0047 | 0        |
| UBQLN1    | 46753 | 1244,8101 | 1,5284 | 0,0047 | 0        |
| GLRX2     | 10886 | 1255,5914 | 1,5774 | 0,0048 | 0        |
| DHRS9     | 7291  | 1258,5919 | 1,784  | 0,0049 | 0        |
| TRMT1     | 46183 | 1260,7421 | 1,624  | 0,0049 | 0        |
| ANXA11    | 1179  | 1261,4697 | 1,5999 | 0,0049 | 0        |
| MAP3K6    | 34649 | 1274,674  | 1,6147 | 0,005  | 0        |
| SLC1A4    | 42857 | 1272,2145 | 1,6052 | 0,005  | 0        |
| C20ORF59  | 3541  | 1270,1808 | 1,593  | 0,005  | 0        |
| CPEB1     | 6159  | 1269,6468 | 1,5766 | 0,005  | 0        |
| HSPBP1    | 25032 | 1265,0434 | 1,5434 | 0,005  | 0        |
| APOC1     | 1312  | 1264,6717 | 1,5409 | 0,005  | 0        |
| STRA13    | 44342 | 1272,0895 | 1,534  | 0,005  | 0        |
| PARVB     | 38147 | 1279,2362 | 1,7987 | 0,0051 | 1,00E-04 |
| PRDM1     | 39735 | 1291,2458 | 1,7649 | 0,0051 | 1,00E-04 |
| RFTN1     | 41053 | 1291,9491 | 1,6584 | 0,0051 | 1,00E-04 |
| CCND1     | 4810  | 1281,5235 | 1,6576 | 0,0051 | 1,00E-04 |
| ARPC1B    | 1586  | 1295,1137 | 1,6314 | 0,0051 | 1,00E-04 |
| ATP1B3    | 1856  | 1291,9499 | 1,5744 | 0,0051 | 1,00E-04 |
| BOLA3     | 2457  | 1280,216  | 1,5688 | 0,0051 | 1,00E-04 |
| PTRH1     | 40331 | 1290,3255 | 1,5602 | 0,0051 | 1,00E-04 |
| C19ORF24  | 3195  | 1271,5983 | 1,5593 | 0,0051 | 0        |
| GSPT1     | 11451 | 1290,5525 | 1,5426 | 0,0051 | 1,00E-04 |
| ARMC6     | 1558  | 1277,3479 | 1,5325 | 0,0051 | 1,00E-04 |
| GFPT1     | 10723 | 1291,9135 | 1,5324 | 0,0051 | 1,00E-04 |
| VAR5      | 47121 | 1289,7775 | 1,6857 | 0,0052 | 1,00E-04 |
| XPOT      | 47677 | 1300,1521 | 1,6394 | 0,0052 | 1,00E-04 |

|           |       |           |        |        |          |
|-----------|-------|-----------|--------|--------|----------|
| ALDOA     | 853   | 1286,5353 | 1,6257 | 0,0052 | 1,00E-04 |
| TOR3A     | 45876 | 1283,9091 | 1,5925 | 0,0052 | 1,00E-04 |
| QSOX1     | 40435 | 1287,6866 | 1,592  | 0,0052 | 1,00E-04 |
| SLC3A2    | 43150 | 1300,6853 | 1,5828 | 0,0052 | 1,00E-04 |
| EHD4      | 8149  | 1310,6122 | 1,5753 | 0,0052 | 1,00E-04 |
| MRPL24    | 35634 | 1294,0179 | 1,5652 | 0,0052 | 1,00E-04 |
| C8ORF33   | 4045  | 1294,3169 | 1,5529 | 0,0052 | 1,00E-04 |
| ETF1      | 8563  | 1304,0466 | 1,5474 | 0,0052 | 1,00E-04 |
| PSPH      | 40150 | 1293,215  | 1,5464 | 0,0052 | 1,00E-04 |
| MAPK6     | 34704 | 1301,0218 | 1,5277 | 0,0052 | 1,00E-04 |
| PPME1     | 39566 | 1312,0596 | 1,5242 | 0,0052 | 1,00E-04 |
| IPO11     | 25642 | 1306,8304 | 1,521  | 0,0052 | 1,00E-04 |
| RNASEH2A  | 41285 | 1309,6031 | 1,5179 | 0,0052 | 1,00E-04 |
| CTLA4     | 6542  | 1283,9199 | 1,5116 | 0,0052 | 1,00E-04 |
| RPS19BP1  | 41632 | 1303,0341 | 1,5083 | 0,0052 | 1,00E-04 |
| CARS      | 4433  | 1323,5992 | 1,6497 | 0,0053 | 1,00E-04 |
| TXNRD1    | 46600 | 1315,4615 | 1,6418 | 0,0053 | 1,00E-04 |
| LOC646197 | 30835 | 1319,0875 | 1,6371 | 0,0053 | 1,00E-04 |
| ANXA2     | 1185  | 1322,0569 | 1,5759 | 0,0053 | 1,00E-04 |
| PPAN      | 39462 | 1308,7205 | 1,5628 | 0,0053 | 1,00E-04 |
| HSPBP1    | 25033 | 1317,5761 | 1,5597 | 0,0053 | 1,00E-04 |
| PDIA6     | 38520 | 1315,9867 | 1,5582 | 0,0053 | 1,00E-04 |
| RUVBL2    | 41835 | 1327,2234 | 1,5579 | 0,0053 | 1,00E-04 |
| POLDIP2   | 39334 | 1325,2511 | 1,5261 | 0,0053 | 1,00E-04 |
| SLC16A6   | 42835 | 1331,7172 | 1,6284 | 0,0054 | 1,00E-04 |
| NCOA7     | 36318 | 1331,4822 | 1,5771 | 0,0054 | 1,00E-04 |
| ATAD3A    | 1759  | 1332,5355 | 1,5441 | 0,0054 | 1,00E-04 |
| HSPA8     | 25020 | 1331,9985 | 1,5224 | 0,0054 | 1,00E-04 |
| CDKN1A    | 5196  | 1339,3334 | 1,77   | 0,0055 | 1,00E-04 |
| STAT3     | 44258 | 1338,069  | 1,6052 | 0,0055 | 1,00E-04 |
| DCUN1D5   | 7003  | 1340,461  | 1,5777 | 0,0055 | 1,00E-04 |
| MRRF      | 35723 | 1342,7995 | 1,5356 | 0,0055 | 1,00E-04 |
| MRPS2     | 35701 | 1339,5171 | 1,5331 | 0,0055 | 1,00E-04 |
| ATP6V0B   | 1929  | 1345,159  | 1,5089 | 0,0056 | 1,00E-04 |
| E2F6      | 7971  | 1352,8471 | 1,566  | 0,0058 | 1,00E-04 |
| DKC1      | 7385  | 1351,3942 | 1,5034 | 0,0058 | 1,00E-04 |
| NR4A3     | 36926 | 1357,3501 | 1,6073 | 0,0059 | 1,00E-04 |
| LOC652545 | 32754 | 1355,4595 | 1,5834 | 0,0059 | 1,00E-04 |
| SERTAD1   | 42417 | 1357,7608 | 1,5695 | 0,0059 | 1,00E-04 |
| C8ORF33   | 4044  | 1358,1353 | 1,5473 | 0,0059 | 1,00E-04 |
| SCPEP1    | 42095 | 1367,6553 | 1,5863 | 0,006  | 1,00E-04 |
| OXCT2     | 37916 | 1372,0845 | 1,5779 | 0,006  | 1,00E-04 |
| ECE2      | 7997  | 1360,6969 | 1,5645 | 0,006  | 1,00E-04 |
| RHOC      | 41189 | 1367,9739 | 1,5592 | 0,006  | 1,00E-04 |
| SAR1B     | 41955 | 1371,054  | 1,5564 | 0,006  | 1,00E-04 |
| ARMC10    | 1553  | 1362,8897 | 1,5429 | 0,006  | 1,00E-04 |
| KIAA1553  | 26376 | 1363,7804 | 1,5353 | 0,006  | 1,00E-04 |



|           |       |           |        |        |          |
|-----------|-------|-----------|--------|--------|----------|
| GLI1      | 10859 | 1365,1071 | 1,5302 | 0,006  | 1,00E-04 |
| RBM28     | 40824 | 1360,6134 | 1,529  | 0,006  | 1,00E-04 |
| KEAP1     | 26146 | 1383,2441 | 1,5739 | 0,0061 | 1,00E-04 |
| PMVK      | 39271 | 1377,8425 | 1,5103 | 0,0061 | 1,00E-04 |
| TTYH3     | 46494 | 1385,2293 | 1,673  | 0,0062 | 1,00E-04 |
| ATP5G1    | 1899  | 1387,7369 | 1,5718 | 0,0062 | 1,00E-04 |
| LOC653381 | 33171 | 1383,8242 | 1,5508 | 0,0062 | 1,00E-04 |
| TWF2      | 46557 | 1386,9485 | 1,5184 | 0,0062 | 1,00E-04 |
| TUBG1     | 46529 | 1392,529  | 1,6293 | 0,0063 | 1,00E-04 |
| TMED9     | 45392 | 1395,876  | 1,6023 | 0,0063 | 1,00E-04 |
| RPL36     | 41563 | 1397,525  | 1,5761 | 0,0063 | 1,00E-04 |
| FKBP1A    | 9509  | 1396,737  | 1,5605 | 0,0063 | 1,00E-04 |
| CSTF2     | 6471  | 1395,8712 | 1,5412 | 0,0063 | 1,00E-04 |
| LMNB2     | 27320 | 1402,785  | 1,5635 | 0,0064 | 1,00E-04 |
| SRP68     | 44070 | 1404,0838 | 1,5484 | 0,0064 | 1,00E-04 |
| SQSTM1    | 44026 | 1398,861  | 1,5259 | 0,0064 | 1,00E-04 |
| CALR      | 4336  | 1406,4716 | 1,5874 | 0,0065 | 1,00E-04 |
| LOC643668 | 29790 | 1411,6407 | 1,5502 | 0,0066 | 1,00E-04 |
| RQCD1     | 41701 | 1408,3595 | 1,5475 | 0,0066 | 1,00E-04 |
| C3ORF68   | 3783  | 1413,0304 | 1,4764 | 0,0066 | 1,00E-04 |
| AK3L1     | 727   | 1417,1681 | 1,7477 | 0,0067 | 1,00E-04 |
| ATP2A2    | 1864  | 1421,8646 | 1,6712 | 0,0067 | 1,00E-04 |
| RGS16     | 41132 | 1417,3895 | 1,6131 | 0,0067 | 1,00E-04 |
| TUBB      | 46511 | 1414,4824 | 1,6096 | 0,0067 | 1,00E-04 |
| EIF6      | 8243  | 1419,3822 | 1,5911 | 0,0067 | 1,00E-04 |
| HK2       | 11998 | 1417,8423 | 1,5851 | 0,0067 | 1,00E-04 |
| ABCE1     | 133   | 1417,7057 | 1,5539 | 0,0067 | 1,00E-04 |
| SPAG9     | 43804 | 1415,6809 | 1,5098 | 0,0067 | 1,00E-04 |
| CDK5R1    | 5171  | 1429,169  | 1,6007 | 0,0068 | 1,00E-04 |
| MRPL15    | 35618 | 1427,2082 | 1,578  | 0,0068 | 1,00E-04 |
| HCFC1R1   | 11704 | 1430,6406 | 1,5175 | 0,0068 | 1,00E-04 |
| MAFG      | 34474 | 1429,6522 | 1,4953 | 0,0068 | 1,00E-04 |
| C3ORF14   | 3717  | 1427,2955 | 1,4307 | 0,0068 | 1,00E-04 |
| CD83      | 5018  | 1432,9651 | 1,734  | 0,0069 | 1,00E-04 |
| SFXN4     | 42526 | 1432,445  | 1,4868 | 0,0069 | 1,00E-04 |
| ATP2A2    | 1862  | 1439,8708 | 1,632  | 0,007  | 1,00E-04 |
| WBSCR22   | 47351 | 1440,805  | 1,5729 | 0,007  | 1,00E-04 |
| MYO1G     | 36074 | 1442,8261 | 1,568  | 0,0071 | 1,00E-04 |
| RANBP1    | 40650 | 1446,8098 | 1,5466 | 0,0071 | 1,00E-04 |
| HSD17B12  | 24956 | 1446,569  | 1,5295 | 0,0071 | 1,00E-04 |
| CCT2      | 4881  | 1456,1115 | 1,6258 | 0,0072 | 1,00E-04 |
| PPRC1     | 39673 | 1455,9237 | 1,5706 | 0,0073 | 1,00E-04 |
| ATP5G1    | 1898  | 1458,594  | 1,5657 | 0,0073 | 1,00E-04 |
| MRPS17    | 35695 | 1453,9577 | 1,5337 | 0,0073 | 1,00E-04 |
| PGM2      | 38710 | 1455,4124 | 1,5155 | 0,0073 | 1,00E-04 |
| SNRPD1    | 43585 | 1453,5257 | 1,5037 | 0,0073 | 1,00E-04 |
| EXOSC5    | 8642  | 1460,9409 | 1,4747 | 0,0073 | 1,00E-04 |

|           |       |           |        |        |          |
|-----------|-------|-----------|--------|--------|----------|
| B4GALT5   | 2093  | 1468,535  | 1,7287 | 0,0074 | 1,00E-04 |
| APRT      | 1345  | 1471,3596 | 1,5424 | 0,0074 | 1,00E-04 |
| EDG4      | 8038  | 1471,3662 | 1,5342 | 0,0074 | 1,00E-04 |
| TMEM147   | 45455 | 1466,3975 | 1,5291 | 0,0074 | 1,00E-04 |
| TUFM      | 46539 | 1468,8738 | 1,5113 | 0,0074 | 1,00E-04 |
| GSTA4     | 11462 | 1471,5091 | 1,4937 | 0,0074 | 1,00E-04 |
| COMTD1    | 6067  | 1466,2952 | 1,4931 | 0,0074 | 1,00E-04 |
| WDR74     | 47464 | 1471,1393 | 1,4579 | 0,0074 | 1,00E-04 |
| KLF4      | 26592 | 1482,134  | 1,624  | 0,0075 | 1,00E-04 |
| PRNP      | 39894 | 1476,9537 | 1,5695 | 0,0075 | 1,00E-04 |
| EZH2      | 8672  | 1477,2124 | 1,5354 | 0,0075 | 1,00E-04 |
| GNL3      | 11003 | 1481,7085 | 1,5321 | 0,0075 | 1,00E-04 |
| LOC728689 | 33700 | 1481,8669 | 1,5127 | 0,0075 | 1,00E-04 |
| BCCIP     | 2230  | 1480,2955 | 1,4861 | 0,0075 | 1,00E-04 |
| PGAM5     | 38681 | 1484,5186 | 1,6233 | 0,0076 | 1,00E-04 |
| PA2G4     | 37977 | 1488,6975 | 1,6207 | 0,0076 | 1,00E-04 |
| EIF4G1    | 8226  | 1489,3912 | 1,5426 | 0,0076 | 1,00E-04 |
| POLR1C    | 39354 | 1491,1006 | 1,5368 | 0,0076 | 1,00E-04 |
| YIF1A     | 47712 | 1484,7835 | 1,5087 | 0,0076 | 1,00E-04 |
| MRRF      | 35724 | 1491,9746 | 1,4987 | 0,0076 | 1,00E-04 |
| GHITM     | 10774 | 1483,3385 | 1,4845 | 0,0076 | 1,00E-04 |
| NOL5A     | 36746 | 1495,0988 | 1,6159 | 0,0077 | 1,00E-04 |
| KIAA0664  | 26243 | 1495,4279 | 1,5309 | 0,0077 | 1,00E-04 |
| SIL1      | 42703 | 1498,649  | 1,5279 | 0,0078 | 1,00E-04 |
| RRS1      | 41730 | 1509,5934 | 1,5833 | 0,008  | 1,00E-04 |
| PNPO      | 39301 | 1509,6758 | 1,566  | 0,008  | 1,00E-04 |
| MTMR14    | 35869 | 1508,6727 | 1,5313 | 0,008  | 1,00E-04 |
| MRPL37    | 35651 | 1509,1939 | 1,522  | 0,008  | 1,00E-04 |
| ARD1A     | 1377  | 1510,2584 | 1,5122 | 0,008  | 1,00E-04 |
| ELOVL6    | 8295  | 1514,2892 | 1,5606 | 0,0081 | 1,00E-04 |
| PSMD2     | 40123 | 1523,5891 | 1,518  | 0,0083 | 1,00E-04 |
| UBE2M     | 46705 | 1521,0954 | 1,5151 | 0,0083 | 1,00E-04 |
| COMT      | 6066  | 1523,5383 | 1,5003 | 0,0083 | 1,00E-04 |
| ATG7      | 1802  | 1525,2167 | 1,5717 | 0,0084 | 1,00E-04 |
| PRKAR1B   | 39830 | 1530,455  | 1,5136 | 0,0085 | 1,00E-04 |
| GK        | 10839 | 1529,4438 | 1,5132 | 0,0085 | 1,00E-04 |
| TTLL12    | 46427 | 1537,4026 | 1,546  | 0,0086 | 1,00E-04 |
| PINX1     | 38930 | 1537,7344 | 1,4902 | 0,0086 | 1,00E-04 |
| AP1S1     | 1222  | 1538,2671 | 1,4738 | 0,0086 | 1,00E-04 |
| TUBG1     | 46530 | 1547,816  | 1,5643 | 0,0087 | 1,00E-04 |
| FAM86A    | 9062  | 1557,4457 | 1,5391 | 0,0089 | 1,00E-04 |
| ILVBL     | 25529 | 1552,0116 | 1,5012 | 0,0089 | 1,00E-04 |
| TMED3     | 45385 | 1561,1202 | 1,5114 | 0,009  | 1,00E-04 |
| CANX      | 4376  | 1560,6474 | 1,5037 | 0,009  | 1,00E-04 |
| SLC16A3   | 42830 | 1568,185  | 1,5516 | 0,0092 | 1,00E-04 |
| IDE       | 25178 | 1568,9643 | 1,4901 | 0,0092 | 1,00E-04 |
| PFAS      | 38641 | 1579,2036 | 1,5406 | 0,0093 | 1,00E-04 |

|              |       |           |        |        |          |
|--------------|-------|-----------|--------|--------|----------|
| FDX1L        | 9353  | 1576,143  | 1,512  | 0,0093 | 1,00E-04 |
| BCS1L        | 2301  | 1579,3551 | 1,4868 | 0,0093 | 1,00E-04 |
| PSMD7        | 40131 | 1575,5898 | 1,481  | 0,0093 | 1,00E-04 |
| GPATCH4      | 11089 | 1586,2201 | 1,5871 | 0,0095 | 1,00E-04 |
| CASP3        | 4459  | 1584,5901 | 1,5705 | 0,0095 | 1,00E-04 |
| IMP4         | 25536 | 1596,2844 | 1,5147 | 0,0097 | 1,00E-04 |
| MRPL23       | 35632 | 1593,7358 | 1,4911 | 0,0097 | 1,00E-04 |
| NDFIP2       | 36332 | 1606,0321 | 1,5579 | 0,0099 | 1,00E-04 |
| DPM2         | 7712  | 1600,8259 | 1,5188 | 0,0099 | 1,00E-04 |
| ATP6V0B      | 1930  | 1601,383  | 1,514  | 0,0099 | 1,00E-04 |
| LOC646531    | 30955 | 1602,9052 | 1,503  | 0,0099 | 1,00E-04 |
| LOC652595    | 32781 | 1604,6474 | 1,4905 | 0,0099 | 1,00E-04 |
| VKORC1L1     | 47207 | 1603,1149 | 1,4855 | 0,0099 | 1,00E-04 |
| ETF1         | 8564  | 1602,9389 | 1,4691 | 0,0099 | 1,00E-04 |
| PSMA1        | 40070 | 1609,6245 | 1,5474 | 0,01   | 1,00E-04 |
| EIF3B        | 8193  | 1608,8276 | 1,5123 | 0,01   | 1,00E-04 |
| EPGN         | 8407  | 1608,3909 | 1,5027 | 0,01   | 1,00E-04 |
| ADM2         | 543   | 1611,7816 | 1,5499 | 0,0101 | 1,00E-04 |
| KIF21B       | 26483 | 1617,6752 | 1,5107 | 0,0101 | 1,00E-04 |
| ZSCAN2       | 48761 | 1614,828  | 1,503  | 0,0101 | 1,00E-04 |
| TPM3         | 45925 | 1614,8912 | 1,4982 | 0,0101 | 1,00E-04 |
| POMP         | 39404 | 1616,1734 | 1,4755 | 0,0101 | 1,00E-04 |
| TNFSF13B     | 45770 | 1615,1801 | 1,468  | 0,0101 | 1,00E-04 |
| FTSJ1        | 10300 | 1611,6209 | 1,4488 | 0,0101 | 1,00E-04 |
| YIF1B        | 47714 | 1623,3796 | 1,4669 | 0,0103 | 1,00E-04 |
| MARS         | 34767 | 1630,4359 | 1,6064 | 0,0104 | 1,00E-04 |
| RAB40B       | 40519 | 1627,669  | 1,5576 | 0,0104 | 1,00E-04 |
| TIMM23       | 45257 | 1627,4706 | 1,5237 | 0,0104 | 1,00E-04 |
| FKBP1A       | 9511  | 1630,3568 | 1,5206 | 0,0104 | 1,00E-04 |
| PSMB3        | 40086 | 1625,9638 | 1,5161 | 0,0104 | 1,00E-04 |
| JOSD1        | 25870 | 1632,8883 | 1,4671 | 0,0104 | 1,00E-04 |
| APRT         | 1346  | 1634,7082 | 1,5141 | 0,0105 | 1,00E-04 |
| LOC391811    | 28285 | 1639,5779 | 1,5077 | 0,0107 | 1,00E-04 |
| IGF2R        | 25290 | 1640,2593 | 1,5007 | 0,0107 | 1,00E-04 |
| STX3         | 44373 | 1642,3684 | 1,5109 | 0,0108 | 1,00E-04 |
| ANXA11       | 1180  | 1643,7422 | 1,4886 | 0,0108 | 2,00E-04 |
| E2F3         | 7967  | 1641,274  | 1,4598 | 0,0108 | 1,00E-04 |
| LOC100008589 | 27345 | 1650,4694 | 1,501  | 0,0109 | 2,00E-04 |
| PTTG3        | 40341 | 1652,689  | 1,484  | 0,0109 | 2,00E-04 |
| ZDHHC9       | 47905 | 1652,0695 | 1,4776 | 0,0109 | 2,00E-04 |
| WDR74        | 47462 | 1651,0002 | 1,4693 | 0,0109 | 2,00E-04 |
| PMM2         | 39244 | 1650,2738 | 1,4681 | 0,0109 | 2,00E-04 |
| PDXP         | 38561 | 1652,0179 | 1,4533 | 0,0109 | 2,00E-04 |
| RASAL1       | 40714 | 1654,1184 | 1,5246 | 0,011  | 2,00E-04 |
| DPH3         | 7705  | 1651,9328 | 1,4976 | 0,011  | 2,00E-04 |
| EXOSC7       | 8644  | 1653,914  | 1,4885 | 0,011  | 2,00E-04 |
| DPH2         | 7703  | 1656,9627 | 1,4823 | 0,011  | 2,00E-04 |

|           |       |           |        |        |          |
|-----------|-------|-----------|--------|--------|----------|
| NOLA2     | 36758 | 1659,6247 | 1,5756 | 0,0111 | 2,00E-04 |
| PRELID1   | 39776 | 1661,7458 | 1,5049 | 0,0111 | 2,00E-04 |
| CANX      | 4377  | 1662,2541 | 1,4754 | 0,0111 | 2,00E-04 |
| DUSP10    | 7861  | 1673,8268 | 1,5182 | 0,0114 | 2,00E-04 |
| TUBA1B    | 46500 | 1676,0526 | 1,6033 | 0,0115 | 2,00E-04 |
| ITGB4BP   | 25784 | 1678,6257 | 1,5169 | 0,0116 | 2,00E-04 |
| KEAP1     | 26144 | 1682,4889 | 1,5122 | 0,0116 | 2,00E-04 |
| SURF4     | 44467 | 1683,7727 | 1,5048 | 0,0116 | 2,00E-04 |
| STAT3     | 44257 | 1681,9675 | 1,4965 | 0,0116 | 2,00E-04 |
| MRPL17    | 35620 | 1682,1355 | 1,4875 | 0,0116 | 2,00E-04 |
| YWHAG     | 47753 | 1683,2756 | 1,486  | 0,0116 | 2,00E-04 |
| HAX1      | 11679 | 1680,7657 | 1,4571 | 0,0116 | 2,00E-04 |
| CISD1     | 5612  | 1680,2129 | 1,4985 | 0,0117 | 2,00E-04 |
| BAX       | 2174  | 1689,8488 | 1,5147 | 0,0118 | 2,00E-04 |
| MRPL13    | 35616 | 1691,4166 | 1,4853 | 0,0118 | 2,00E-04 |
| LOC728564 | 33683 | 1692,6277 | 1,4611 | 0,0119 | 2,00E-04 |
| WDR46     | 47425 | 1704,5741 | 1,5369 | 0,0122 | 2,00E-04 |
| KLK1      | 26654 | 1708,3795 | 1,5061 | 0,0122 | 2,00E-04 |
| DDX39     | 7080  | 1707,9321 | 1,4631 | 0,0122 | 2,00E-04 |
| AP1S1     | 1221  | 1703,981  | 1,4453 | 0,0122 | 2,00E-04 |
| LOC731682 | 33986 | 1707,7322 | 1,258  | 0,0122 | 2,00E-04 |
| NOL1      | 36734 | 1713,4318 | 1,6021 | 0,0123 | 2,00E-04 |
| TIMM8A    | 45263 | 1710,8268 | 1,4852 | 0,0123 | 2,00E-04 |
| LOC285216 | 27770 | 1712,9175 | 1,4783 | 0,0123 | 2,00E-04 |
| C6ORF125  | 3884  | 1712,033  | 1,4745 | 0,0123 | 2,00E-04 |
| GTPBP4    | 11546 | 1717,7355 | 1,49   | 0,0124 | 2,00E-04 |
| TST       | 46367 | 1716,1474 | 1,4895 | 0,0124 | 2,00E-04 |
| BOLA2     | 2454  | 1717,7819 | 1,4838 | 0,0124 | 2,00E-04 |
| ICOSLG    | 25169 | 1719,8161 | 1,4781 | 0,0124 | 2,00E-04 |
| CD320     | 4953  | 1720,0847 | 1,4732 | 0,0124 | 2,00E-04 |
| MAD2L2    | 34454 | 1719,1244 | 1,468  | 0,0124 | 2,00E-04 |
| PSMC2     | 40099 | 1724,2292 | 1,4718 | 0,0125 | 2,00E-04 |
| HLA-DPB2  | 12014 | 1726,8511 | 1,6079 | 0,0126 | 2,00E-04 |
| BRP44     | 2522  | 1733,7452 | 1,4891 | 0,0127 | 2,00E-04 |
| DUSP4     | 7888  | 1730,9393 | 1,4846 | 0,0127 | 2,00E-04 |
| C10ORF2   | 2664  | 1732,2502 | 1,4793 | 0,0127 | 2,00E-04 |
| MRPS6     | 35720 | 1735,1474 | 1,4276 | 0,0127 | 2,00E-04 |
| PIPSL     | 38949 | 1734,9497 | 1,51   | 0,0128 | 2,00E-04 |
| MOCOS     | 35493 | 1744,9804 | 1,5896 | 0,0129 | 2,00E-04 |
| SNORA10   | 43514 | 1743,6191 | 1,5139 | 0,0129 | 2,00E-04 |
| C1ORF24   | 3369  | 1746,9294 | 1,5081 | 0,0129 | 2,00E-04 |
| BOLA2     | 2450  | 1743,0385 | 1,4917 | 0,0129 | 2,00E-04 |
| GNG8      | 10998 | 1740,557  | 1,3479 | 0,0129 | 2,00E-04 |
| RHOC      | 41190 | 1748,7973 | 1,4771 | 0,013  | 2,00E-04 |
| YBX1      | 47705 | 1744,7165 | 1,4737 | 0,013  | 2,00E-04 |
| SELS      | 42252 | 1749,1475 | 1,4379 | 0,013  | 2,00E-04 |
| LOC400455 | 28359 | 1753,702  | 1,4665 | 0,0131 | 2,00E-04 |

|           |       |           |        |        |          |
|-----------|-------|-----------|--------|--------|----------|
| ATP1A1    | 1841  | 1752,0127 | 1,4638 | 0,0131 | 2,00E-04 |
| MPDU1     | 35533 | 1756,4873 | 1,5124 | 0,0132 | 2,00E-04 |
| ACSL1     | 306   | 1756,1247 | 1,5047 | 0,0132 | 2,00E-04 |
| TIPIN     | 45278 | 1755,651  | 1,4323 | 0,0132 | 2,00E-04 |
| KCNK4     | 26056 | 1760,6748 | 1,4734 | 0,0133 | 2,00E-04 |
| PGM1      | 38709 | 1762,6691 | 1,5559 | 0,0134 | 2,00E-04 |
| MGC13057  | 35145 | 1767,0285 | 1,4843 | 0,0135 | 2,00E-04 |
| ELK1      | 8268  | 1769,9218 | 1,4351 | 0,0135 | 2,00E-04 |
| BOLA2     | 2452  | 1767,5452 | 1,5221 | 0,0136 | 2,00E-04 |
| TIMM10    | 45252 | 1771,0715 | 1,4939 | 0,0136 | 2,00E-04 |
| HCST      | 11729 | 1774,1033 | 1,4938 | 0,0136 | 2,00E-04 |
| YIF1B     | 47715 | 1773,2217 | 1,4695 | 0,0136 | 2,00E-04 |
| ABCB1     | 85    | 1773,3391 | 1,454  | 0,0136 | 2,00E-04 |
| LOC643668 | 29789 | 1786,6439 | 1,5309 | 0,0138 | 2,00E-04 |
| MGC40489  | 35221 | 1783,4211 | 1,4911 | 0,0138 | 2,00E-04 |
| SCO2      | 42091 | 1784,6343 | 1,5245 | 0,0139 | 2,00E-04 |
| SH2D5     | 42581 | 1787,789  | 1,4845 | 0,0139 | 2,00E-04 |
| ECGF1     | 8001  | 1793,3441 | 1,5309 | 0,014  | 2,00E-04 |
| PFN1      | 38659 | 1794,0527 | 1,5177 | 0,014  | 2,00E-04 |
| TCEB1     | 44892 | 1793,8996 | 1,4678 | 0,014  | 2,00E-04 |
| LY9       | 34374 | 1795,1263 | 1,4544 | 0,0141 | 2,00E-04 |
| GCLM      | 10643 | 1797,961  | 1,4595 | 0,0142 | 2,00E-04 |
| EMG1      | 8306  | 1800,2175 | 1,5591 | 0,0143 | 2,00E-04 |
| SCN3A     | 42070 | 1807,1073 | 1,5046 | 0,0144 | 2,00E-04 |
| MT2A      | 35818 | 1806,3903 | 1,4419 | 0,0144 | 2,00E-04 |
| ITGB2     | 25777 | 1808,2474 | 1,4081 | 0,0144 | 2,00E-04 |
| TCP11L1   | 44963 | 1813,5266 | 1,4429 | 0,0146 | 2,00E-04 |
| PSMD1     | 40110 | 1816,5087 | 1,5208 | 0,0147 | 2,00E-04 |
| ACTN4     | 361   | 1823,0535 | 1,4746 | 0,0148 | 2,00E-04 |
| C9ORF114  | 4097  | 1821,1923 | 1,4461 | 0,0148 | 2,00E-04 |
| HSD17B12  | 24955 | 1826,2538 | 1,4702 | 0,0149 | 2,00E-04 |
| FBXO6     | 9268  | 1829,6715 | 1,5205 | 0,015  | 2,00E-04 |
| EIF2B2    | 8178  | 1827,8083 | 1,4311 | 0,015  | 2,00E-04 |
| CMTM7     | 5849  | 1829,4358 | 1,4198 | 0,015  | 2,00E-04 |
| CD83      | 5017  | 1837,6139 | 1,5814 | 0,0152 | 2,00E-04 |
| HSD17B10  | 24952 | 1835,9918 | 1,4704 | 0,0152 | 2,00E-04 |
| ATP6V1F   | 1950  | 1838,8294 | 1,4462 | 0,0153 | 2,00E-04 |
| INHBE     | 25584 | 1845,1151 | 1,5165 | 0,0154 | 2,00E-04 |
| LGALS8    | 27163 | 1842,3098 | 1,4792 | 0,0154 | 2,00E-04 |
| STOML2    | 44334 | 1844,9633 | 1,4587 | 0,0154 | 2,00E-04 |
| FKBP1A    | 9510  | 1851,0456 | 1,4826 | 0,0155 | 2,00E-04 |
| AVEN      | 2029  | 1847,8218 | 1,4826 | 0,0155 | 2,00E-04 |
| ACAT2     | 228   | 1853,0843 | 1,5278 | 0,0156 | 2,00E-04 |
| ATP5B     | 1890  | 1853,5131 | 1,5071 | 0,0156 | 2,00E-04 |
| SLC25A25  | 42937 | 1853,5567 | 1,4936 | 0,0156 | 2,00E-04 |
| POLR2H    | 39367 | 1855,016  | 1,4377 | 0,0156 | 2,00E-04 |
| PRMT1     | 39882 | 1859,9404 | 1,5068 | 0,0158 | 3,00E-04 |

|           |       |           |        |        |          |
|-----------|-------|-----------|--------|--------|----------|
| PARP8     | 38141 | 1858,5365 | 1,4573 | 0,0158 | 3,00E-04 |
| C9ORF46   | 4157  | 1859,6146 | 1,4398 | 0,0158 | 3,00E-04 |
| SELS      | 42251 | 1863,7902 | 1,4083 | 0,0159 | 3,00E-04 |
| C11ORF48  | 2773  | 1869,4699 | 1,4647 | 0,016  | 3,00E-04 |
| ILF2      | 25519 | 1874,0499 | 1,4664 | 0,0161 | 3,00E-04 |
| ECGF1     | 8002  | 1879,5131 | 1,524  | 0,0163 | 3,00E-04 |
| DHCR7     | 7264  | 1879,5571 | 1,5072 | 0,0163 | 3,00E-04 |
| MAT2A     | 34793 | 1881,7572 | 1,4471 | 0,0163 | 3,00E-04 |
| MRPS15    | 35693 | 1889,0137 | 1,4503 | 0,0165 | 3,00E-04 |
| THOC4     | 45186 | 1889,789  | 1,4883 | 0,0166 | 3,00E-04 |
| AP1S1     | 1223  | 1890,0957 | 1,4196 | 0,0166 | 3,00E-04 |
| ALG3      | 870   | 1899,723  | 1,484  | 0,0169 | 3,00E-04 |
| CTSZ      | 6607  | 1899,4449 | 1,4835 | 0,0169 | 3,00E-04 |
| RPL37A    | 41571 | 1902,4459 | 1,4523 | 0,0169 | 3,00E-04 |
| LRRC42    | 34223 | 1899,8753 | 1,4297 | 0,0169 | 3,00E-04 |
| C1ORF163  | 3321  | 1905,978  | 1,4808 | 0,017  | 3,00E-04 |
| SLC30A5   | 43053 | 1904,2226 | 1,4245 | 0,017  | 3,00E-04 |
| MT1X      | 35817 | 1909,7221 | 1,4743 | 0,0171 | 3,00E-04 |
| ALDOC     | 857   | 1909,4147 | 1,4696 | 0,0172 | 3,00E-04 |
| C20ORF27  | 3526  | 1918,516  | 1,4451 | 0,0175 | 3,00E-04 |
| CHMP2A    | 5501  | 1930,6728 | 1,457  | 0,0177 | 3,00E-04 |
| TNFRSF10A | 45728 | 1924,0701 | 1,4378 | 0,0177 | 3,00E-04 |
| NXT1      | 37187 | 1934,1359 | 1,4287 | 0,0179 | 3,00E-04 |
| FKBP1A    | 9512  | 1936,5951 | 1,5122 | 0,018  | 3,00E-04 |
| FARSA     | 9134  | 1940,0036 | 1,4578 | 0,018  | 3,00E-04 |
| PDF       | 38494 | 1938,7301 | 1,4427 | 0,018  | 3,00E-04 |
| GNG5      | 10996 | 1936,6027 | 1,4182 | 0,018  | 3,00E-04 |
| PCCB      | 38214 | 1941,0728 | 1,5154 | 0,0181 | 3,00E-04 |
| LOC652826 | 32921 | 1940,9504 | 1,4908 | 0,0181 | 3,00E-04 |
| LOC402221 | 28510 | 1942,1256 | 1,4735 | 0,0181 | 3,00E-04 |
| PTTG1     | 40337 | 1939,875  | 1,446  | 0,0181 | 3,00E-04 |
| ATF4      | 1774  | 1947,7051 | 1,4721 | 0,0184 | 3,00E-04 |
| PTPRE     | 40303 | 1947,4355 | 1,4282 | 0,0184 | 3,00E-04 |
| PLEKHB2   | 39138 | 1951,6383 | 1,4576 | 0,0187 | 3,00E-04 |
| PDIA3P    | 38517 | 1954,512  | 1,4843 | 0,0188 | 3,00E-04 |
| CLPP      | 5784  | 1953,8116 | 1,4269 | 0,0188 | 3,00E-04 |
| ATP6VOC   | 1933  | 1953,9251 | 1,3985 | 0,0188 | 3,00E-04 |
| IRF4      | 25690 | 1959,1986 | 1,4785 | 0,0189 | 3,00E-04 |
| FXYD5     | 10357 | 1956,3255 | 1,4284 | 0,0189 | 3,00E-04 |
| C5ORF32   | 3844  | 1969,5077 | 1,5017 | 0,0193 | 3,00E-04 |
| BNIP3     | 2438  | 1972,65   | 1,4909 | 0,0194 | 3,00E-04 |
| BCKDK     | 2240  | 1970,1287 | 1,4468 | 0,0194 | 3,00E-04 |
| ZNF207    | 48121 | 1973,5462 | 1,4435 | 0,0195 | 3,00E-04 |
| RNH1      | 41419 | 1978,4504 | 1,4364 | 0,0197 | 3,00E-04 |
| PXMP2     | 40388 | 1979,6995 | 1,4064 | 0,0197 | 3,00E-04 |
| LOC644330 | 30116 | 1979,6651 | 1,4033 | 0,0197 | 3,00E-04 |
| NDUFAB1   | 36363 | 1982,2079 | 1,447  | 0,0198 | 3,00E-04 |

|           |       |           |        |        |          |
|-----------|-------|-----------|--------|--------|----------|
| ASS1      | 1741  | 1982,3535 | 1,4432 | 0,0198 | 3,00E-04 |
| C6ORF115  | 3876  | 1981,8678 | 1,4229 | 0,0198 | 3,00E-04 |
| ARPC4     | 1592  | 1988,1873 | 1,4933 | 0,0199 | 3,00E-04 |
| GRWD1     | 11433 | 1987,584  | 1,4419 | 0,0199 | 3,00E-04 |
| ADORA3    | 554   | 1990,8046 | 1,4404 | 0,0201 | 3,00E-04 |
| ESRRA     | 8554  | 1991,6912 | 1,4354 | 0,0201 | 3,00E-04 |
| TMEM185B  | 45530 | 1992,3236 | 1,3952 | 0,0201 | 3,00E-04 |
| EXOSC3    | 8640  | 1997,8987 | 1,4919 | 0,0204 | 3,00E-04 |
| PSMG1     | 40143 | 2006,3948 | 1,4567 | 0,0207 | 4,00E-04 |
| MRPS18B   | 35698 | 2006,8014 | 1,454  | 0,0207 | 4,00E-04 |
| TUBG1     | 46528 | 2007,0665 | 1,4539 | 0,0207 | 4,00E-04 |
| SLC29A1   | 43018 | 2004,2345 | 1,4518 | 0,0207 | 4,00E-04 |
| THOP1     | 45193 | 2007,1135 | 1,4381 | 0,0207 | 4,00E-04 |
| AARSD1    | 49    | 2004,4675 | 1,4273 | 0,0207 | 4,00E-04 |
| TMEM109   | 45414 | 2013,2061 | 1,4371 | 0,0209 | 4,00E-04 |
| RBM18     | 40812 | 2013,8938 | 1,4185 | 0,0209 | 4,00E-04 |
| LOC653344 | 33155 | 2019,6033 | 1,5487 | 0,021  | 4,00E-04 |
| SNRPB     | 43579 | 2016,4792 | 1,421  | 0,021  | 4,00E-04 |
| CHCHD8    | 5451  | 2018,8439 | 1,4176 | 0,021  | 4,00E-04 |
| RPLP0     | 41595 | 2022,1193 | 1,4938 | 0,0211 | 4,00E-04 |
| SNTB1     | 43599 | 2023,9915 | 1,449  | 0,0211 | 4,00E-04 |
| EIF5B     | 8242  | 2020,5272 | 1,4203 | 0,0211 | 4,00E-04 |
| CCT7      | 4894  | 2029,788  | 1,4873 | 0,0212 | 4,00E-04 |
| PDCD1     | 38417 | 2027,9691 | 1,4383 | 0,0212 | 4,00E-04 |
| CCRN4L    | 4877  | 2035,4398 | 1,4704 | 0,0214 | 4,00E-04 |
| RPA1      | 41483 | 2035,3331 | 1,4353 | 0,0214 | 4,00E-04 |
| SPAG9     | 43805 | 2033,7151 | 1,4298 | 0,0214 | 4,00E-04 |
| GSR       | 11454 | 2036,4076 | 1,4151 | 0,0214 | 4,00E-04 |
| TRUB2     | 46249 | 2034,5003 | 1,3985 | 0,0214 | 4,00E-04 |
| KHSRP     | 26161 | 2043,6151 | 1,4205 | 0,0216 | 4,00E-04 |
| ITPKA     | 25816 | 2054,5529 | 1,4842 | 0,022  | 4,00E-04 |
| TIMM23    | 45258 | 2056,1507 | 1,4413 | 0,0221 | 4,00E-04 |
| UST       | 47068 | 2057,0021 | 1,412  | 0,0221 | 4,00E-04 |
| NIT2      | 36602 | 2060,0088 | 1,4608 | 0,0223 | 4,00E-04 |
| TFRC      | 45107 | 2063,4951 | 1,4503 | 0,0223 | 4,00E-04 |
| C3ORF37   | 3750  | 2060,8917 | 1,4219 | 0,0223 | 4,00E-04 |
| USMG5     | 46985 | 2062,1749 | 1,3517 | 0,0223 | 4,00E-04 |
| HLA-DRB4  | 12024 | 2061,8438 | 1,3321 | 0,0223 | 4,00E-04 |
| TPM2      | 45922 | 2062,7732 | 1,3309 | 0,0223 | 4,00E-04 |
| ATF4      | 1776  | 2065,2683 | 1,4653 | 0,0224 | 4,00E-04 |
| SNORD48   | 43561 | 2068,6678 | 1,4377 | 0,0224 | 4,00E-04 |
| LOC644422 | 30158 | 2069,2806 | 1,4181 | 0,0224 | 4,00E-04 |
| GABARAPL1 | 10411 | 2079,8455 | 1,4964 | 0,0227 | 4,00E-04 |
| MAPKAP1   | 34719 | 2081,2803 | 1,4737 | 0,0227 | 4,00E-04 |
| SMG5      | 43418 | 2076,8431 | 1,4678 | 0,0227 | 4,00E-04 |
| SND1      | 43495 | 2076,9361 | 1,4576 | 0,0227 | 4,00E-04 |
| ABCF2     | 139   | 2077,0212 | 1,4473 | 0,0227 | 4,00E-04 |

|           |       |           |        |        |          |
|-----------|-------|-----------|--------|--------|----------|
| PHPT1     | 38823 | 2075,952  | 1,4421 | 0,0227 | 4,00E-04 |
| NUTF2     | 37162 | 2077,8324 | 1,4374 | 0,0227 | 4,00E-04 |
| HTATIP2   | 25056 | 2080,778  | 1,4224 | 0,0227 | 4,00E-04 |
| WDR18     | 47374 | 2086,3846 | 1,4316 | 0,0228 | 4,00E-04 |
| GOLPH4    | 11056 | 2082,744  | 1,412  | 0,0228 | 4,00E-04 |
| KIAA0368  | 26208 | 2088,8236 | 1,4454 | 0,0229 | 4,00E-04 |
| MCTS1     | 34922 | 2088,4731 | 1,4354 | 0,0229 | 4,00E-04 |
| RPP40     | 41611 | 2086,103  | 1,4266 | 0,0229 | 4,00E-04 |
| PHB       | 38739 | 2095,0405 | 1,4309 | 0,0231 | 4,00E-04 |
| MYO1E     | 36072 | 2097,4316 | 1,4399 | 0,0232 | 4,00E-04 |
| GCDH      | 10627 | 2098,4459 | 1,4507 | 0,0233 | 4,00E-04 |
| LPL       | 34121 | 2102,5762 | 1,3683 | 0,0234 | 4,00E-04 |
| TUBA3D    | 46504 | 2106,0928 | 1,4898 | 0,0235 | 4,00E-04 |
| C7ORF24   | 3999  | 2109,8605 | 1,4843 | 0,0236 | 4,00E-04 |
| SLC35F2   | 43095 | 2108,3448 | 1,4554 | 0,0236 | 4,00E-04 |
| HK2       | 11997 | 2118,757  | 1,4904 | 0,0239 | 4,00E-04 |
| GFOD1     | 10721 | 2117,283  | 1,3544 | 0,0239 | 4,00E-04 |
| TRIM29    | 46082 | 2120,0762 | 1,4562 | 0,024  | 4,00E-04 |
| HERPUD1   | 11812 | 2123,9618 | 1,483  | 0,0241 | 4,00E-04 |
| SLC15A3   | 42818 | 2123,4549 | 1,4423 | 0,0241 | 4,00E-04 |
| C7ORF20   | 3992  | 2123,19   | 1,4261 | 0,0241 | 4,00E-04 |
| DNAJB6    | 7578  | 2125,4179 | 1,422  | 0,0241 | 4,00E-04 |
| FLJ38482  | 9821  | 2126,3048 | 1,4141 | 0,0241 | 4,00E-04 |
| MAGMAS    | 34551 | 2126,1761 | 1,3883 | 0,0241 | 4,00E-04 |
| CTLA4     | 6544  | 2130,5379 | 1,181  | 0,0243 | 4,00E-04 |
| CENPN     | 5305  | 2135,0722 | 1,4453 | 0,0244 | 5,00E-04 |
| PDIA4     | 38518 | 2132,667  | 1,4287 | 0,0244 | 5,00E-04 |
| TTC27     | 46393 | 2131,4884 | 1,3828 | 0,0244 | 5,00E-04 |
| PINX1     | 38931 | 2131,2613 | 1,3756 | 0,0244 | 5,00E-04 |
| MGAT4B    | 35126 | 2136,8313 | 1,4219 | 0,0245 | 5,00E-04 |
| MTHFD1    | 35844 | 2137,2663 | 1,3993 | 0,0245 | 5,00E-04 |
| HS.14706  | 13275 | 2142,7151 | 1,4005 | 0,0247 | 5,00E-04 |
| TPM2      | 45924 | 2141,5544 | 1,3347 | 0,0247 | 5,00E-04 |
| SNX8      | 43654 | 2146,0792 | 1,5086 | 0,0249 | 5,00E-04 |
| PTRH2     | 40332 | 2154,7632 | 1,4224 | 0,0252 | 5,00E-04 |
| LY96      | 34376 | 2154,9066 | 1,4215 | 0,0252 | 5,00E-04 |
| NDUFA4L2  | 36358 | 2157,7814 | 1,5116 | 0,0254 | 5,00E-04 |
| HCST      | 11728 | 2159,8325 | 1,3494 | 0,0254 | 5,00E-04 |
| POLR3B    | 39387 | 2161,6521 | 1,4927 | 0,0255 | 5,00E-04 |
| CEBPG     | 5271  | 2164,0089 | 1,4557 | 0,0255 | 5,00E-04 |
| FAM98A    | 9099  | 2165,243  | 1,4359 | 0,0255 | 5,00E-04 |
| LOC162073 | 27541 | 2163,38   | 1,4356 | 0,0255 | 5,00E-04 |
| G6PD      | 10397 | 2162,2623 | 1,4204 | 0,0255 | 5,00E-04 |
| FADD      | 8723  | 2165,7551 | 1,4207 | 0,0256 | 5,00E-04 |
| CCT7      | 4893  | 2170,5259 | 1,4393 | 0,0258 | 5,00E-04 |
| TSR1      | 46358 | 2169,2129 | 1,4211 | 0,0258 | 5,00E-04 |
| PHYH      | 38828 | 2175,3011 | 1,4418 | 0,026  | 5,00E-04 |



|           |       |           |        |        |          |
|-----------|-------|-----------|--------|--------|----------|
| SUPV3L1   | 44464 | 2176,9965 | 1,3994 | 0,026  | 5,00E-04 |
| CCT3      | 4882  | 2176,5019 | 1,385  | 0,026  | 5,00E-04 |
| LOC143666 | 27442 | 2179,7704 | 1,4864 | 0,0261 | 5,00E-04 |
| C16ORF35  | 3044  | 2182,0573 | 1,4398 | 0,0262 | 5,00E-04 |
| MAPKAP1   | 34721 | 2187,4397 | 1,4251 | 0,0264 | 5,00E-04 |
| HERPUD1   | 11811 | 2191,9777 | 1,4493 | 0,0265 | 5,00E-04 |
| LOC643287 | 29627 | 2191,7957 | 1,4431 | 0,0266 | 5,00E-04 |
| HEATR1    | 11763 | 2193,2206 | 1,4154 | 0,0266 | 5,00E-04 |
| SRD5A1    | 44036 | 2194,1916 | 1,4048 | 0,0266 | 5,00E-04 |
| LOC731314 | 33968 | 2201,2289 | 1,3811 | 0,027  | 5,00E-04 |
| CHMP4A    | 5505  | 2210,3511 | 1,44   | 0,0274 | 5,00E-04 |
| HMBS      | 12049 | 2211,1494 | 1,4153 | 0,0274 | 5,00E-04 |
| LOC643668 | 29791 | 2219,4787 | 1,4814 | 0,0278 | 5,00E-04 |
| TNFSF4    | 45778 | 2220,3973 | 1,4498 | 0,0278 | 5,00E-04 |
| TIMM23    | 45260 | 2218,354  | 1,4468 | 0,0278 | 5,00E-04 |
| TRIP13    | 46178 | 2219,5753 | 1,4163 | 0,0278 | 5,00E-04 |
| P2RX7     | 37942 | 2227,0104 | 1,4516 | 0,0282 | 5,00E-04 |
| SSSCA1    | 44120 | 2226,0923 | 1,4279 | 0,0282 | 5,00E-04 |
| MCAT      | 34875 | 2229,3479 | 1,4109 | 0,0283 | 5,00E-04 |
| CDK2AP2   | 5167  | 2233,6265 | 1,4273 | 0,0285 | 6,00E-04 |
| DUSP10    | 7858  | 2234,632  | 1,4137 | 0,0286 | 6,00E-04 |
| ARHGDI1   | 1455  | 2237,4504 | 1,4006 | 0,0286 | 6,00E-04 |
| PGD       | 38695 | 2238,7766 | 1,4958 | 0,0287 | 6,00E-04 |
| PSMC4     | 40105 | 2236,7647 | 1,4864 | 0,0287 | 6,00E-04 |
| HLA-DRB3  | 12023 | 2235,7208 | 1,4711 | 0,0287 | 6,00E-04 |
| LARP1     | 26987 | 2238,2247 | 1,4296 | 0,0287 | 6,00E-04 |
| RAD23A    | 40586 | 2237,2563 | 1,4275 | 0,0287 | 6,00E-04 |
| LSS       | 34317 | 2241,8143 | 1,4396 | 0,0288 | 6,00E-04 |
| C2ORF47   | 3689  | 2243,7115 | 1,4274 | 0,0288 | 6,00E-04 |
| CCT6A     | 4887  | 2242,8849 | 1,4041 | 0,0288 | 6,00E-04 |
| TIMM23    | 45259 | 2246,4902 | 1,4252 | 0,0289 | 6,00E-04 |
| HADH2     | 11639 | 2244,5906 | 1,409  | 0,0289 | 6,00E-04 |
| ANAPC11   | 1003  | 2249,0674 | 1,4162 | 0,029  | 6,00E-04 |
| KLK4      | 26671 | 2253,4236 | 1,571  | 0,0292 | 6,00E-04 |
| MGAT1     | 35117 | 2259,4174 | 1,4103 | 0,0295 | 6,00E-04 |
| LOC644330 | 30115 | 2261,3826 | 1,4048 | 0,0295 | 6,00E-04 |
| SEC61G    | 42227 | 2265,1059 | 1,3936 | 0,0297 | 6,00E-04 |
| C12ORF49  | 2849  | 2268,2073 | 1,4362 | 0,0298 | 6,00E-04 |
| HNRNPA1   | 12109 | 2271,5373 | 1,4428 | 0,03   | 6,00E-04 |
| C6ORF89   | 3982  | 2272,8425 | 1,3955 | 0,03   | 6,00E-04 |
| HS.538259 | 17211 | 2273,8782 | 1,4192 | 0,0301 | 6,00E-04 |
| RER1      | 41001 | 2279,2545 | 1,4036 | 0,0302 | 6,00E-04 |
| PSMD4     | 40127 | 2276,3591 | 1,4027 | 0,0302 | 6,00E-04 |
| RNMTL1    | 41421 | 2277,445  | 1,3922 | 0,0302 | 6,00E-04 |
| DTD1      | 7823  | 2280,1685 | 1,3833 | 0,0303 | 6,00E-04 |
| ATP6V1H   | 1957  | 2281,8812 | 1,3819 | 0,0303 | 6,00E-04 |
| SEPHS2    | 42303 | 2284,7085 | 1,3645 | 0,0304 | 6,00E-04 |

|           |       |           |        |        |          |
|-----------|-------|-----------|--------|--------|----------|
| RCL1      | 40921 | 2288,9634 | 1,4026 | 0,0305 | 6,00E-04 |
| CALU      | 4338  | 2284,6323 | 1,3841 | 0,0305 | 6,00E-04 |
| SLC35F2   | 43096 | 2291,6734 | 1,4392 | 0,0306 | 6,00E-04 |
| LOC646849 | 31064 | 2291,1639 | 1,4338 | 0,0306 | 6,00E-04 |
| PRDM13    | 39740 | 2288,7902 | 1,3749 | 0,0306 | 6,00E-04 |
| MYL2      | 36033 | 2293,8302 | 1,4805 | 0,0307 | 6,00E-04 |
| G3BP1     | 10385 | 2295,489  | 1,4577 | 0,0307 | 6,00E-04 |
| ACOT9     | 280   | 2294,0545 | 1,4549 | 0,0307 | 6,00E-04 |
| RIOK1     | 41233 | 2294,638  | 1,4128 | 0,0307 | 6,00E-04 |
| TBL3      | 44823 | 2297,9701 | 1,4272 | 0,0308 | 6,00E-04 |
| NFKBIB    | 36521 | 2300,767  | 1,3869 | 0,0308 | 6,00E-04 |
| HEG1      | 11782 | 2300,6377 | 1,3788 | 0,0308 | 6,00E-04 |
| ABI2      | 179   | 2299,1694 | 1,3748 | 0,0308 | 6,00E-04 |
| MID1IP1   | 35316 | 2302,2517 | 1,5014 | 0,0309 | 6,00E-04 |
| ATIC      | 1808  | 2302,7983 | 1,4113 | 0,0309 | 6,00E-04 |
| RPS6KB2   | 41686 | 2302,4812 | 1,3662 | 0,0309 | 6,00E-04 |
| C7ORF50   | 4024  | 2306,3    | 1,4124 | 0,031  | 6,00E-04 |
| COX7B     | 6138  | 2313,562  | 1,4365 | 0,0312 | 6,00E-04 |
| GSS       | 11455 | 2312,2278 | 1,4301 | 0,0312 | 6,00E-04 |
| CD97      | 5035  | 2312,7802 | 1,4011 | 0,0312 | 6,00E-04 |
| HS.563053 | 21202 | 2314,9268 | 1,393  | 0,0313 | 6,00E-04 |
| CLTA      | 5800  | 2316,649  | 1,3896 | 0,0313 | 6,00E-04 |
| HS.10862  | 12336 | 2321,2167 | 1,5858 | 0,0315 | 6,00E-04 |
| DPH3      | 7704  | 2320,5562 | 1,414  | 0,0315 | 6,00E-04 |
| PSMB6     | 40089 | 2321,7888 | 1,4078 | 0,0315 | 6,00E-04 |
| BATF      | 2171  | 2324,7212 | 1,493  | 0,0316 | 6,00E-04 |
| LOC652493 | 32727 | 2326,6959 | 0,7551 | 0,0317 | 6,00E-04 |
| DHX33     | 7306  | 2331,0201 | 1,3825 | 0,0319 | 7,00E-04 |
| CAD       | 4297  | 2334,0805 | 1,3902 | 0,032  | 7,00E-04 |
| DNAJB11   | 7557  | 2338,8319 | 1,4178 | 0,0322 | 7,00E-04 |
| SNHG4     | 43507 | 2346,0471 | 1,3971 | 0,0327 | 7,00E-04 |
| RBM18     | 40811 | 2355,0341 | 1,3544 | 0,0332 | 7,00E-04 |
| SEC11C    | 42184 | 2358,1142 | 1,4194 | 0,0333 | 7,00E-04 |
| MRPL47    | 35672 | 2358,6875 | 1,4121 | 0,0333 | 7,00E-04 |
| XPO5      | 47674 | 2361,5078 | 1,409  | 0,0333 | 7,00E-04 |
| NUBP1     | 37064 | 2362,0697 | 1,3975 | 0,0333 | 7,00E-04 |
| CTSC      | 6588  | 2357,1314 | 1,3918 | 0,0333 | 7,00E-04 |
| AXUD1     | 2042  | 2362,6861 | 1,383  | 0,0333 | 7,00E-04 |
| C20ORF45  | 3535  | 2359,9645 | 1,3523 | 0,0333 | 7,00E-04 |
| DOK3      | 7677  | 2366,3479 | 1,4029 | 0,0334 | 7,00E-04 |
| BHLHB2    | 2339  | 2370,7926 | 1,5061 | 0,0335 | 7,00E-04 |
| LOC401115 | 28427 | 2372,1646 | 1,4628 | 0,0335 | 7,00E-04 |
| COX5A     | 6127  | 2371,2978 | 1,4388 | 0,0335 | 7,00E-04 |
| FAM96B    | 9098  | 2370,3759 | 1,3844 | 0,0336 | 7,00E-04 |
| SNUPN     | 43604 | 2370,5307 | 1,3831 | 0,0336 | 7,00E-04 |
| IFITM2    | 25219 | 2378,2321 | 1,4133 | 0,0337 | 7,00E-04 |
| SEMA4A    | 42265 | 2378,9771 | 1,375  | 0,0337 | 7,00E-04 |

|           |       |           |        |        |          |
|-----------|-------|-----------|--------|--------|----------|
| TUBA1A    | 46499 | 2377,2351 | 1,485  | 0,0338 | 7,00E-04 |
| PLAGL2    | 39074 | 2377,8903 | 1,4159 | 0,0338 | 7,00E-04 |
| DNASE2    | 7621  | 2381,6466 | 1,4027 | 0,0338 | 7,00E-04 |
| MT1A      | 35805 | 2381,0026 | 1,3478 | 0,0338 | 7,00E-04 |
| GOT2      | 11072 | 2386,5635 | 1,4632 | 0,034  | 7,00E-04 |
| TCEB1     | 44893 | 2385,022  | 1,3809 | 0,034  | 7,00E-04 |
| GATAD2A   | 10592 | 2395,0514 | 1,3939 | 0,0345 | 7,00E-04 |
| SLC39A1   | 43127 | 2397,3741 | 1,3784 | 0,0345 | 7,00E-04 |
| ILVBL     | 25528 | 2396,6526 | 1,3698 | 0,0345 | 7,00E-04 |
| LRMP      | 34154 | 2396,5835 | 1,4011 | 0,0346 | 7,00E-04 |
| PNO1      | 39289 | 2403,8647 | 1,3999 | 0,0348 | 7,00E-04 |
| LOC723972 | 33535 | 2402,7096 | 1,3989 | 0,0348 | 7,00E-04 |
| IMPAD1    | 25542 | 2404,6082 | 1,3801 | 0,0348 | 7,00E-04 |
| NAB2      | 36131 | 2405,7678 | 1,3605 | 0,0349 | 7,00E-04 |
| TXNDC17   | 46580 | 2409,7081 | 1,3957 | 0,0351 | 7,00E-04 |
| POLR2F    | 39365 | 2413,0191 | 1,3748 | 0,0353 | 7,00E-04 |
| MRPS12    | 35690 | 2414,5126 | 1,3914 | 0,0354 | 7,00E-04 |
| GBE1      | 10605 | 2417,6185 | 1,397  | 0,0355 | 8,00E-04 |
| SLCO4A1   | 43314 | 2417,4895 | 1,3961 | 0,0355 | 8,00E-04 |
| ATP6V0A2  | 1924  | 2421,1797 | 1,4413 | 0,0356 | 8,00E-04 |
| CD151     | 4900  | 2420,7716 | 1,3657 | 0,0356 | 8,00E-04 |
| MEMO1     | 35024 | 2422,1201 | 1,3658 | 0,0357 | 8,00E-04 |
| GEMIN4    | 10705 | 2424,5285 | 1,3964 | 0,0358 | 8,00E-04 |
| GBA       | 10598 | 2425,1163 | 1,3876 | 0,0358 | 8,00E-04 |
| NCBP1     | 36284 | 2427,9425 | 1,3533 | 0,0358 | 8,00E-04 |
| ADSL      | 579   | 2427,7865 | 1,4468 | 0,0359 | 8,00E-04 |
| RPL7L1    | 41587 | 2433,9002 | 1,431  | 0,0361 | 8,00E-04 |
| AHSA1     | 693   | 2436,8633 | 1,4527 | 0,0362 | 8,00E-04 |
| ARF4      | 1383  | 2435,4617 | 1,3932 | 0,0362 | 8,00E-04 |
| ATF3      | 1771  | 2440,4787 | 1,4146 | 0,0364 | 8,00E-04 |
| EIF3I     | 8202  | 2440,0891 | 1,4086 | 0,0364 | 8,00E-04 |
| ZSCAN2    | 48760 | 2441,2347 | 1,3805 | 0,0364 | 8,00E-04 |
| BANF1     | 2147  | 2444,4433 | 1,4343 | 0,0366 | 8,00E-04 |
| BUD31     | 2619  | 2445,7974 | 1,4035 | 0,0366 | 8,00E-04 |
| SEC24D    | 42217 | 2446,154  | 1,3638 | 0,0366 | 8,00E-04 |
| PVT1      | 40375 | 2450,0197 | 1,4027 | 0,0367 | 8,00E-04 |
| VEGFA     | 47169 | 2453,885  | 1,3824 | 0,0368 | 8,00E-04 |
| SPCS3     | 43866 | 2454,9352 | 1,3592 | 0,0368 | 8,00E-04 |
| DNAJC3    | 7600  | 2453,5511 | 1,3563 | 0,0368 | 8,00E-04 |
| YWHAB     | 47749 | 2453,2043 | 1,3709 | 0,0369 | 8,00E-04 |
| HRAS      | 12258 | 2457,5008 | 1,3571 | 0,0369 | 8,00E-04 |
| BNIP1     | 2436  | 2464,0764 | 1,4289 | 0,037  | 8,00E-04 |
| CD97      | 5037  | 2461,7468 | 1,4209 | 0,037  | 8,00E-04 |
| TNPO2     | 45811 | 2461,9489 | 1,404  | 0,037  | 8,00E-04 |
| ALG8      | 876   | 2460,4718 | 1,3541 | 0,037  | 8,00E-04 |
| DARS2     | 6906  | 2461,239  | 1,3466 | 0,037  | 8,00E-04 |
| PRKAG1    | 39821 | 2464,0029 | 1,4475 | 0,0371 | 8,00E-04 |

|           |       |           |        |        |          |
|-----------|-------|-----------|--------|--------|----------|
| SNORA64   | 43519 | 2465,7657 | 1,4074 | 0,0371 | 8,00E-04 |
| PIM3      | 38926 | 2471,0201 | 1,3988 | 0,0374 | 8,00E-04 |
| C1ORF43   | 3381  | 2471,0379 | 1,3506 | 0,0374 | 8,00E-04 |
| GMPPB     | 10942 | 2474,4843 | 1,4441 | 0,0375 | 8,00E-04 |
| HPRT1     | 12236 | 2475,1347 | 1,3915 | 0,0375 | 8,00E-04 |
| TMED10P   | 45383 | 2476,6921 | 1,391  | 0,0376 | 8,00E-04 |
| C12ORF24  | 2821  | 2478,6671 | 1,4231 | 0,0377 | 8,00E-04 |
| HSPA5     | 25017 | 2481,9496 | 1,3803 | 0,0377 | 8,00E-04 |
| CTTN      | 6608  | 2481,7317 | 1,4721 | 0,0378 | 8,00E-04 |
| DNLZ      | 7633  | 2480,7653 | 1,4137 | 0,0378 | 8,00E-04 |
| CSNK2A1P  | 6434  | 2481,0527 | 1,3821 | 0,0378 | 8,00E-04 |
| SOX8      | 43748 | 2484,783  | 1,3667 | 0,0379 | 8,00E-04 |
| LARP2     | 26991 | 2488,739  | 1,3627 | 0,0381 | 8,00E-04 |
| HAVCR2    | 11677 | 2488,2381 | 1,3522 | 0,0381 | 8,00E-04 |
| RRAGC     | 41708 | 2493,2212 | 1,3839 | 0,0383 | 8,00E-04 |
| IRAK1     | 25676 | 2495,4251 | 1,3923 | 0,0384 | 8,00E-04 |
| TCP1      | 44954 | 2500,528  | 1,4027 | 0,0386 | 9,00E-04 |
| PHF5A     | 38787 | 2504,8558 | 1,3708 | 0,0388 | 9,00E-04 |
| ANAPC11   | 1000  | 2506,9745 | 1,4111 | 0,0389 | 9,00E-04 |
| FIBP      | 9484  | 2508,1767 | 1,3701 | 0,039  | 9,00E-04 |
| PABPC4    | 37985 | 2508,8563 | 1,3544 | 0,039  | 9,00E-04 |
| STK39     | 44320 | 2510,8951 | 1,3285 | 0,039  | 9,00E-04 |
| C21ORF70  | 3623  | 2515,481  | 1,4059 | 0,0391 | 9,00E-04 |
| HNRPLL    | 12140 | 2514,7923 | 1,3548 | 0,0391 | 9,00E-04 |
| CTH       | 6539  | 2516,7487 | 1,3997 | 0,0392 | 9,00E-04 |
| TSPAN17   | 46313 | 2514,5266 | 1,3547 | 0,0392 | 9,00E-04 |
| RAP1GAP   | 40671 | 2522,5663 | 1,4426 | 0,0394 | 9,00E-04 |
| LAP3      | 26978 | 2521,1846 | 1,4078 | 0,0394 | 9,00E-04 |
| UBFD1     | 46738 | 2524,284  | 1,3938 | 0,0394 | 9,00E-04 |
| NRAS      | 36938 | 2522,4178 | 1,3914 | 0,0394 | 9,00E-04 |
| NAT5      | 36211 | 2526,1048 | 1,3874 | 0,0394 | 9,00E-04 |
| LOC727761 | 33550 | 2523,7857 | 1,3861 | 0,0394 | 9,00E-04 |
| KIAA0241  | 26184 | 2525,5578 | 1,3807 | 0,0394 | 9,00E-04 |
| PDHA1     | 38509 | 2523,9921 | 1,358  | 0,0394 | 9,00E-04 |
| C6ORF108  | 3873  | 2527,2474 | 1,4704 | 0,0395 | 9,00E-04 |
| BTG3      | 2585  | 2528,2552 | 1,4343 | 0,0395 | 9,00E-04 |
| DCI       | 6961  | 2537,5758 | 1,3663 | 0,0401 | 9,00E-04 |
| TWIST1    | 46558 | 2540,0521 | 1,3908 | 0,0402 | 9,00E-04 |
| MRPL3     | 35640 | 2542,1628 | 1,3859 | 0,0403 | 9,00E-04 |
| ITPKB     | 25817 | 2546,9694 | 1,3127 | 0,0405 | 9,00E-04 |
| HAX1      | 11680 | 2546,6983 | 1,3595 | 0,0406 | 9,00E-04 |
| RAB38     | 40506 | 2551,1018 | 1,4923 | 0,0407 | 9,00E-04 |
| DPP3      | 7719  | 2553,2656 | 1,4051 | 0,0408 | 9,00E-04 |
| RHBDF1    | 41164 | 2553,121  | 1,3947 | 0,0408 | 9,00E-04 |
| ACTG1     | 349   | 2553,5352 | 1,3793 | 0,0408 | 9,00E-04 |
| WDR55     | 47440 | 2556,3079 | 1,3551 | 0,0409 | 9,00E-04 |
| NOL6      | 36748 | 2564,9695 | 1,4264 | 0,0412 | 9,00E-04 |

|           |       |           |        |        |          |
|-----------|-------|-----------|--------|--------|----------|
| PDIA5     | 38519 | 2563,4435 | 1,3894 | 0,0412 | 9,00E-04 |
| CARS      | 4432  | 2561,814  | 1,384  | 0,0412 | 9,00E-04 |
| EIF1AY    | 8169  | 2562,6627 | 1,032  | 0,0412 | 9,00E-04 |
| PTCD1     | 40165 | 2568,4711 | 1,3761 | 0,0413 | 9,00E-04 |
| ME2       | 34948 | 2565,8223 | 1,3759 | 0,0413 | 9,00E-04 |
| CAMTA2    | 4371  | 2566,5692 | 1,3752 | 0,0413 | 9,00E-04 |
| CCDC58    | 4695  | 2568,4062 | 1,3688 | 0,0413 | 9,00E-04 |
| HK1       | 11993 | 2561,7755 | 1,3599 | 0,0413 | 9,00E-04 |
| PPAT      | 39490 | 2568,9908 | 1,3498 | 0,0413 | 9,00E-04 |
| PFKFB4    | 38654 | 2570,1126 | 1,4356 | 0,0414 | 0,001    |
| PSMC1     | 40098 | 2570,9188 | 1,3856 | 0,0414 | 0,001    |
| C6ORF66   | 3973  | 2575,6584 | 1,341  | 0,0416 | 0,001    |
| C3ORF31   | 3740  | 2578,4446 | 1,3542 | 0,0417 | 0,001    |
| CCT3      | 4883  | 2581,0182 | 1,4153 | 0,0418 | 0,001    |
| SLC29A1   | 43019 | 2580,2478 | 1,3672 | 0,0418 | 0,001    |
| PSMC4     | 40106 | 2584,7006 | 1,4377 | 0,0419 | 0,001    |
| NUDC      | 37070 | 2583,5682 | 1,3949 | 0,0419 | 0,001    |
| TXNRD1    | 46601 | 2589,152  | 1,4117 | 0,0422 | 0,001    |
| DPP3      | 7718  | 2591,7983 | 1,4036 | 0,0422 | 0,001    |
| TFB2M     | 45078 | 2590,4817 | 1,403  | 0,0422 | 0,001    |
| SEH1L     | 42234 | 2588,7651 | 1,3762 | 0,0422 | 0,001    |
| ARF1      | 1379  | 2593,3542 | 1,3478 | 0,0423 | 0,001    |
| C18ORF1   | 3151  | 2591,561  | 1,3364 | 0,0423 | 0,001    |
| SURF6     | 44468 | 2598,1377 | 1,3817 | 0,0424 | 0,001    |
| PSMD11    | 40114 | 2597,9024 | 1,3588 | 0,0424 | 0,001    |
| PTTG1     | 40336 | 2600,84   | 1,3582 | 0,0426 | 0,001    |
| MID1IP1   | 35317 | 2611,4991 | 1,437  | 0,0431 | 0,001    |
| NINJ1     | 36586 | 2609,1131 | 1,3484 | 0,0431 | 0,001    |
| AMDHD2    | 948   | 2612,4462 | 1,3899 | 0,0432 | 0,001    |
| LOC642489 | 29278 | 2614,814  | 1,4209 | 0,0433 | 0,001    |
| POLA2     | 39328 | 2615,1095 | 1,3902 | 0,0433 | 0,001    |
| MED19     | 34970 | 2625,1786 | 1,3924 | 0,0438 | 0,001    |
| TSEN2     | 46270 | 2623,3844 | 1,3672 | 0,0438 | 0,001    |
| GTF2IRD1  | 11522 | 2628,4896 | 1,394  | 0,0439 | 0,001    |
| ATP1A1    | 1843  | 2625,0775 | 1,3834 | 0,0439 | 0,001    |
| TBC1D13   | 44764 | 2627,0109 | 1,3677 | 0,0439 | 0,001    |
| WDR40A    | 47411 | 2627,405  | 1,3549 | 0,0439 | 0,001    |
| CLIC4     | 5746  | 2628,2542 | 1,4126 | 0,044  | 0,001    |
| HARS      | 11666 | 2634,5392 | 1,3705 | 0,0443 | 0,001    |
| RPA1      | 41482 | 2634,9389 | 1,3446 | 0,0443 | 0,001    |
| SGPP2     | 42556 | 2640,8286 | 1,4146 | 0,0445 | 0,0011   |
| EIF3B     | 8194  | 2638,8844 | 1,3824 | 0,0445 | 0,0011   |
| TUBB4Q    | 46519 | 2640,1132 | 1,3803 | 0,0445 | 0,0011   |
| METRNL    | 35054 | 2645,7197 | 1,3574 | 0,0448 | 0,0011   |
| GUK1      | 11573 | 2648,2558 | 1,3536 | 0,0449 | 0,0011   |
| PRNPIP    | 39896 | 2649,9665 | 1,3703 | 0,045  | 0,0011   |
| DLK2      | 7476  | 2652,1448 | 1,3764 | 0,0451 | 0,0011   |

|           |       |           |        |        |        |
|-----------|-------|-----------|--------|--------|--------|
| C12ORF11  | 2818  | 2656,4639 | 1,4186 | 0,0453 | 0,0011 |
| ATPBD1B   | 1977  | 2661,0834 | 1,4035 | 0,0454 | 0,0011 |
| LOC653147 | 33039 | 2659,6187 | 1,3869 | 0,0454 | 0,0011 |
| BCAT2     | 2227  | 2659,2854 | 1,3671 | 0,0454 | 0,0011 |
| HNRNPA3   | 12111 | 2657,8755 | 1,3666 | 0,0454 | 0,0011 |
| PIGR      | 38880 | 2662,0225 | 1,3557 | 0,0455 | 0,0011 |
| POLR1C    | 39355 | 2672,5101 | 1,3756 | 0,0463 | 0,0011 |
| FECH      | 9357  | 2672,3477 | 1,3622 | 0,0463 | 0,0011 |
| BSG       | 2547  | 2678,2111 | 1,3627 | 0,0465 | 0,0011 |
| CISD1     | 5613  | 2680,3695 | 1,369  | 0,0467 | 0,0011 |
| LOC646567 | 30967 | 2683,9744 | 1,3335 | 0,0469 | 0,0011 |
| GOSR2     | 11068 | 2687,1747 | 1,4046 | 0,0471 | 0,0011 |
| BXDC2     | 2624  | 2689,299  | 1,3403 | 0,0472 | 0,0011 |
| ITPA      | 25813 | 2691,3309 | 1,359  | 0,0474 | 0,0011 |
| CCT6A     | 4886  | 2693,8807 | 1,3912 | 0,0475 | 0,0011 |
| FLJ20699  | 9643  | 2700,4885 | 1,3771 | 0,0481 | 0,0012 |
| ITPA      | 25814 | 2701,5972 | 1,356  | 0,0482 | 0,0012 |
| AURKAIP1  | 2022  | 2704,0825 | 1,3358 | 0,0483 | 0,0012 |
| CD276     | 4938  | 2705,6345 | 1,3899 | 0,0484 | 0,0012 |
| LOC647450 | 31278 | 2705,5774 | 0,7713 | 0,0484 | 0,0012 |
| RPL32     | 41555 | 2707,3562 | 1,33   | 0,0485 | 0,0012 |
| CTSD      | 6590  | 2713,3766 | 1,4034 | 0,0487 | 0,0012 |
| SGTA      | 42564 | 2711,7929 | 1,3433 | 0,0487 | 0,0012 |
| MTMR14    | 35867 | 2717,0447 | 1,4081 | 0,049  | 0,0012 |
| LOC654244 | 33519 | 2721,9658 | 1,3846 | 0,0491 | 0,0012 |
| LOC649143 | 31753 | 2720,9701 | 1,2981 | 0,0491 | 0,0012 |
| RANBP1    | 40649 | 2723,9312 | 1,4139 | 0,0492 | 0,0012 |
| PSMD13    | 40120 | 2723,6003 | 1,3702 | 0,0492 | 0,0012 |
| CHCHD1    | 5443  | 2721,7409 | 1,352  | 0,0492 | 0,0012 |
| RPS4Y1    | 41666 | 2724,3929 | 0,852  | 0,0492 | 0,0012 |
| MRPS16    | 35694 | 2729,309  | 1,3398 | 0,0495 | 0,0012 |
| CCT7      | 4892  | 2731,1374 | 1,3764 | 0,0496 | 0,0012 |
| EIF3A     | 8191  | 2732,6293 | 1,3499 | 0,0497 | 0,0012 |

**RP analysis 24h****Downregulated**

|         | gene.index | RP/Rsum  | FC:(class1/class2) | pfp | P.value |
|---------|------------|----------|--------------------|-----|---------|
| LTB     | 34325      | 47,4189  | 0,1789             | 0   | 0       |
| VPREB3  | 47227      | 38,7515  | 0,2209             | 0   | 0       |
| CD24    | 4929       | 51,6218  | 0,2269             | 0   | 0       |
| LTB     | 34326      | 115,8455 | 0,254              | 0   | 0       |
| TXNIP   | 46594      | 80,9778  | 0,2759             | 0   | 0       |
| CECR1   | 5274       | 60,9348  | 0,2906             | 0   | 0       |
| TMEM71  | 45624      | 91,6962  | 0,3038             | 0   | 0       |
| ALOX5   | 904        | 79,1002  | 0,3117             | 0   | 0       |
| SNORD13 | 43532      | 115,5095 | 0,3126             | 0   | 0       |
| GNG7    | 10997      | 92,4924  | 0,3141             | 0   | 0       |

|              |       |          |        |   |   |
|--------------|-------|----------|--------|---|---|
| CXCR4        | 6673  | 109,5496 | 0,3188 | 0 | 0 |
| C1ORF162     | 3320  | 147,9929 | 0,3252 | 0 | 0 |
| TGFBI        | 45117 | 137,6737 | 0,329  | 0 | 0 |
| SPOCK2       | 43947 | 113,8165 | 0,3314 | 0 | 0 |
| GPR18        | 11211 | 146,7112 | 0,3381 | 0 | 0 |
| C6ORF105     | 3868  | 188,867  | 0,3384 | 0 | 0 |
| PYHIN1       | 40412 | 156,7867 | 0,3551 | 0 | 0 |
| EVI2B        | 8598  | 145,1206 | 0,3574 | 0 | 0 |
| DPEP2        | 7695  | 137,7466 | 0,361  | 0 | 0 |
| RNASE6       | 41280 | 218,3885 | 0,3613 | 0 | 0 |
| DEF8         | 7125  | 133,1259 | 0,3622 | 0 | 0 |
| HS.185764    | 13839 | 137,2281 | 0,3682 | 0 | 0 |
| LOC90925     | 34054 | 231,6771 | 0,3718 | 0 | 0 |
| LAMA5        | 26952 | 140,112  | 0,3749 | 0 | 0 |
| TTC21A       | 46384 | 144,1439 | 0,376  | 0 | 0 |
| CXCR4        | 6671  | 219,1836 | 0,3808 | 0 | 0 |
| RARRES3      | 40705 | 245,1906 | 0,3862 | 0 | 0 |
| ADRB2        | 573   | 168,7753 | 0,3868 | 0 | 0 |
| PRICKLE1     | 39796 | 251,9518 | 0,3891 | 0 | 0 |
| SELL         | 42245 | 241,4765 | 0,3895 | 0 | 0 |
| FCGBP        | 9307  | 361,6826 | 0,3905 | 0 | 0 |
| VIPR1        | 47200 | 229,1561 | 0,3906 | 0 | 0 |
| NCR3         | 36325 | 308,378  | 0,397  | 0 | 0 |
| IFIT2        | 25213 | 241,6134 | 0,3974 | 0 | 0 |
| PYHIN1       | 40411 | 247,519  | 0,3997 | 0 | 0 |
| TCTN1        | 44974 | 241,8374 | 0,402  | 0 | 0 |
| GGA2         | 10740 | 188,9379 | 0,4023 | 0 | 0 |
| PDE7B        | 38483 | 222,786  | 0,4054 | 0 | 0 |
| LFNG         | 27149 | 269,859  | 0,4068 | 0 | 0 |
| NCF1C        | 36293 | 218,7784 | 0,4091 | 0 | 0 |
| PRDM8        | 39756 | 244,5443 | 0,4097 | 0 | 0 |
| ABCA7        | 79    | 198,9142 | 0,4121 | 0 | 0 |
| SLA          | 42765 | 219,1355 | 0,4134 | 0 | 0 |
| LOC197135    | 27556 | 206,1749 | 0,4137 | 0 | 0 |
| CD37         | 4963  | 249,5186 | 0,4254 | 0 | 0 |
| RAB37        | 40501 | 242,9386 | 0,4293 | 0 | 0 |
| GALNAC4S-6ST | 10505 | 304,7543 | 0,4314 | 0 | 0 |
| KLF2         | 26589 | 242,4214 | 0,4326 | 0 | 0 |
| FAM129C      | 8833  | 263,1546 | 0,4338 | 0 | 0 |
| COBLL1       | 5949  | 333,6379 | 0,4361 | 0 | 0 |
| PYHIN1       | 40410 | 307,8518 | 0,4364 | 0 | 0 |
| ADAM19       | 412   | 259,0713 | 0,4386 | 0 | 0 |
| LBH          | 27026 | 284,4538 | 0,4393 | 0 | 0 |
| LHPP         | 27191 | 284,6578 | 0,4419 | 0 | 0 |
| NCF1         | 36291 | 287,3111 | 0,4436 | 0 | 0 |
| CD37         | 4964  | 282,5251 | 0,4451 | 0 | 0 |
| SAMD9        | 41933 | 301,0022 | 0,4457 | 0 | 0 |

|           |       |          |        |          |   |
|-----------|-------|----------|--------|----------|---|
| C10ORF73  | 2720  | 285,8668 | 0,4462 | 0        | 0 |
| ZNF831    | 48710 | 285,8614 | 0,4469 | 0        | 0 |
| EDG1      | 8036  | 309,5595 | 0,4512 | 0        | 0 |
| TEAD2     | 44999 | 363,4303 | 0,4513 | 0        | 0 |
| SAMD9L    | 41934 | 318,1469 | 0,4532 | 0        | 0 |
| SEMA4B    | 42266 | 309,0321 | 0,4587 | 0        | 0 |
| SIGLEC10  | 42684 | 362,6766 | 0,4603 | 0        | 0 |
| XAF1      | 47619 | 314,7238 | 0,461  | 0        | 0 |
| CTPS2     | 6573  | 320,8235 | 0,4636 | 0        | 0 |
| YPEL3     | 47733 | 359,6243 | 0,4822 | 0        | 0 |
| RALGPS1   | 40636 | 358,5354 | 0,4867 | 0        | 0 |
| C5ORF29   | 3841  | 417,0137 | 0,4438 | 1,00E-04 | 0 |
| ITGB7     | 25791 | 376,3585 | 0,4443 | 1,00E-04 | 0 |
| ALOX5AP   | 907   | 376,7729 | 0,4603 | 1,00E-04 | 0 |
| C16ORF74  | 3075  | 390,6551 | 0,4646 | 1,00E-04 | 0 |
| SUSD3     | 44471 | 418,8975 | 0,4654 | 1,00E-04 | 0 |
| CDC25B    | 5068  | 366,2881 | 0,4689 | 1,00E-04 | 0 |
| SLC44A2   | 43167 | 383,7375 | 0,4724 | 1,00E-04 | 0 |
| CROP      | 6309  | 370,9537 | 0,4747 | 1,00E-04 | 0 |
| HS.18081  | 13815 | 378,1613 | 0,4799 | 1,00E-04 | 0 |
| C6ORF32   | 3955  | 417,2722 | 0,4808 | 1,00E-04 | 0 |
| FGR       | 9468  | 418,7944 | 0,4809 | 1,00E-04 | 0 |
| EVL       | 8601  | 408,8757 | 0,4823 | 1,00E-04 | 0 |
| C9ORF45   | 4156  | 400,8686 | 0,4827 | 1,00E-04 | 0 |
| HS.576106 | 23379 | 417,5639 | 0,484  | 1,00E-04 | 0 |
| C1ORF63   | 3397  | 381,6981 | 0,4878 | 1,00E-04 | 0 |
| PDE7A     | 38481 | 424,0082 | 0,482  | 2,00E-04 | 0 |
| SLC9A9    | 43294 | 431,1907 | 0,5006 | 2,00E-04 | 0 |
| C5        | 3828  | 439,2158 | 0,47   | 3,00E-04 | 0 |
| CHI3L2    | 5478  | 445,1957 | 0,4295 | 4,00E-04 | 0 |
| RASGRP2   | 40731 | 527,7051 | 0,4863 | 4,00E-04 | 0 |
| BTG2      | 2584  | 535,8105 | 0,5019 | 4,00E-04 | 0 |
| C7ORF41   | 4016  | 526,6858 | 0,5073 | 4,00E-04 | 0 |
| LOC730256 | 33881 | 517,9673 | 0,5126 | 4,00E-04 | 0 |
| OSBPL10   | 37823 | 517,6385 | 0,5131 | 4,00E-04 | 0 |
| AMN1      | 964   | 536,4682 | 0,5236 | 4,00E-04 | 0 |
| NBPF11    | 36241 | 534,0247 | 0,5305 | 4,00E-04 | 0 |
| CEACAM1   | 5256  | 506,4032 | 0,4628 | 5,00E-04 | 0 |
| CD24      | 4930  | 498,3651 | 0,4631 | 5,00E-04 | 0 |
| RXRA      | 41845 | 548,9583 | 0,4676 | 5,00E-04 | 0 |
| SYPL1     | 44557 | 486,8173 | 0,4711 | 5,00E-04 | 0 |
| LY86      | 34372 | 444,3756 | 0,4729 | 5,00E-04 | 0 |
| LRIG1     | 34148 | 469,8208 | 0,4759 | 5,00E-04 | 0 |
| HS.532698 | 16864 | 478,4421 | 0,4846 | 5,00E-04 | 0 |
| HLA-DOB   | 12011 | 444,8329 | 0,4939 | 5,00E-04 | 0 |
| ZNF266    | 48175 | 460,58   | 0,4943 | 5,00E-04 | 0 |
| KLHL14    | 26622 | 471,9934 | 0,4991 | 5,00E-04 | 0 |



|           |       |          |        |          |   |
|-----------|-------|----------|--------|----------|---|
| KIAA1407  | 26348 | 485,1976 | 0,5002 | 5,00E-04 | 0 |
| FAM111A   | 8786  | 461,8753 | 0,5007 | 5,00E-04 | 0 |
| TCL1A     | 44941 | 475,7847 | 0,5013 | 5,00E-04 | 0 |
| C3ORF34   | 3744  | 482,0201 | 0,5014 | 5,00E-04 | 0 |
| ADAM28    | 420   | 460,9875 | 0,5025 | 5,00E-04 | 0 |
| FGD3      | 9399  | 507,3166 | 0,5046 | 5,00E-04 | 0 |
| MAPK8IP3  | 34716 | 453,1232 | 0,5124 | 5,00E-04 | 0 |
| BRWD2     | 2542  | 492,329  | 0,5144 | 5,00E-04 | 0 |
| NUAK2     | 37061 | 501,8789 | 0,5157 | 5,00E-04 | 0 |
| HERC5     | 11809 | 495,8119 | 0,5161 | 5,00E-04 | 0 |
| KIAA0182  | 26177 | 503,2465 | 0,5179 | 5,00E-04 | 0 |
| CBX7      | 4551  | 503,7572 | 0,5216 | 5,00E-04 | 0 |
| RERE      | 41002 | 499,9654 | 0,5242 | 5,00E-04 | 0 |
| TBC1D9    | 44803 | 448,609  | 0,4443 | 6,00E-04 | 0 |
| ADD3      | 518   | 551,123  | 0,5081 | 6,00E-04 | 0 |
| KIAA1370  | 26344 | 554,8002 | 0,5095 | 6,00E-04 | 0 |
| CLK1      | 5761  | 561,5687 | 0,5161 | 6,00E-04 | 0 |
| ADAM28    | 422   | 551,1618 | 0,5171 | 6,00E-04 | 0 |
| DDX51     | 7097  | 566,5732 | 0,5273 | 6,00E-04 | 0 |
| P2RY8     | 37964 | 552,5766 | 0,5321 | 6,00E-04 | 0 |
| MS4A1     | 35733 | 557,2885 | 0,5403 | 6,00E-04 | 0 |
| HS.478682 | 16216 | 552,7766 | 0,5469 | 6,00E-04 | 0 |
| CYSLTR1   | 6860  | 569,0732 | 0,4855 | 7,00E-04 | 0 |
| CNTNAP2   | 5936  | 582,5906 | 0,5151 | 8,00E-04 | 0 |
| MAP3K1    | 34635 | 578,2582 | 0,5193 | 8,00E-04 | 0 |
| MCART1    | 34870 | 580,4243 | 0,5212 | 8,00E-04 | 0 |
| PDE4B     | 38457 | 576,1283 | 0,5259 | 8,00E-04 | 0 |
| PCMTD1    | 38367 | 587,6558 | 0,5304 | 8,00E-04 | 0 |
| ZNF549    | 48443 | 581,2444 | 0,5316 | 8,00E-04 | 0 |
| KLF11     | 26579 | 588,5212 | 0,5325 | 8,00E-04 | 0 |
| TCF3      | 44924 | 583,8282 | 0,5387 | 8,00E-04 | 0 |
| C4ORF34   | 3813  | 610,1537 | 0,5067 | 9,00E-04 | 0 |
| LRCH4     | 34137 | 593,6651 | 0,5335 | 9,00E-04 | 0 |
| IL16      | 25385 | 594,4682 | 0,5342 | 9,00E-04 | 0 |
| NKTR      | 36621 | 594,5924 | 0,5353 | 9,00E-04 | 0 |
| TAGLN     | 44677 | 608,5286 | 0,5421 | 9,00E-04 | 0 |
| LPP       | 34123 | 634,2842 | 0,5196 | 0,0011   | 0 |
| BRDG1     | 2501  | 634,4564 | 0,5247 | 0,0011   | 0 |
| NUB1      | 37063 | 621,6045 | 0,5294 | 0,0011   | 0 |
| TOP1MT    | 45854 | 624,0445 | 0,5414 | 0,0011   | 0 |
| GSDML     | 11441 | 636,6741 | 0,5426 | 0,0011   | 0 |
| RASGRP2   | 40730 | 643,6889 | 0,5144 | 0,0012   | 0 |
| APOL3     | 1327  | 638,9438 | 0,515  | 0,0012   | 0 |
| IL10RA    | 25361 | 680,1472 | 0,5225 | 0,0012   | 0 |
| CXXC5     | 6719  | 678,4274 | 0,5287 | 0,0012   | 0 |
| GVIN1     | 11581 | 639,4854 | 0,5293 | 0,0012   | 0 |
| IFT57     | 25269 | 632,5134 | 0,5326 | 0,0012   | 0 |

|           |       |          |        |        |   |
|-----------|-------|----------|--------|--------|---|
| PRIC285   | 39795 | 677,72   | 0,5334 | 0,0012 | 0 |
| GOLGA8B   | 11042 | 667,8816 | 0,5348 | 0,0012 | 0 |
| VEZF1     | 47180 | 627,8103 | 0,5349 | 0,0012 | 0 |
| ZNF33B    | 48262 | 627,9526 | 0,5349 | 0,0012 | 0 |
| C6ORF192  | 3932  | 679,1473 | 0,5368 | 0,0012 | 0 |
| C21ORF24  | 3578  | 628,198  | 0,5435 | 0,0012 | 0 |
| MAGT1     | 34554 | 680,5923 | 0,5451 | 0,0012 | 0 |
| POFUT1    | 39314 | 665,3183 | 0,5481 | 0,0012 | 0 |
| HS.91389  | 24831 | 666,374  | 0,56   | 0,0012 | 0 |
| ANXA1     | 1177  | 682,0466 | 0,5077 | 0,0013 | 0 |
| SLC7A7    | 43268 | 648,3855 | 0,5086 | 0,0013 | 0 |
| PLAC8     | 39065 | 659,3905 | 0,5136 | 0,0013 | 0 |
| LOC90586  | 34050 | 670,7846 | 0,5408 | 0,0013 | 0 |
| LOC730994 | 33941 | 657,9607 | 0,5425 | 0,0013 | 0 |
| FAM111A   | 8787  | 674,3316 | 0,5432 | 0,0013 | 0 |
| FCRLA     | 9346  | 654,3038 | 0,5441 | 0,0013 | 0 |
| TP53INP1  | 45890 | 657,1952 | 0,5453 | 0,0013 | 0 |
| SULT1A1   | 44413 | 670,4455 | 0,5461 | 0,0013 | 0 |
| C13ORF18  | 2873  | 670,9608 | 0,5523 | 0,0013 | 0 |
| HERC6     | 11810 | 671,5896 | 0,5569 | 0,0013 | 0 |
| WNT3      | 47567 | 693,3032 | 0,4923 | 0,0014 | 0 |
| TNK2      | 45786 | 688,2994 | 0,5612 | 0,0014 | 0 |
| GLIPR1    | 10863 | 695,2282 | 0,5001 | 0,0015 | 0 |
| ADAM8     | 440   | 695,6812 | 0,5239 | 0,0015 | 0 |
| ARL16     | 1516  | 696,1979 | 0,5309 | 0,0015 | 0 |
| PLEKHG1   | 39145 | 714,4379 | 0,5415 | 0,0015 | 0 |
| PLCL2     | 39098 | 729,0373 | 0,5434 | 0,0015 | 0 |
| TRIM22    | 46070 | 723,8492 | 0,5435 | 0,0015 | 0 |
| HYPK      | 25136 | 729,1509 | 0,5535 | 0,0015 | 0 |
| C13ORF18  | 2872  | 706,3387 | 0,5539 | 0,0015 | 0 |
| DUSP19    | 7875  | 715,3471 | 0,5552 | 0,0015 | 0 |
| IL18      | 25406 | 707,3751 | 0,5584 | 0,0015 | 0 |
| EBI2      | 7986  | 712,5844 | 0,4783 | 0,0016 | 0 |
| PTPRO     | 40317 | 705,3441 | 0,5039 | 0,0016 | 0 |
| IGJ       | 25309 | 736,4792 | 0,517  | 0,0016 | 0 |
| MYOM1     | 36093 | 712,316  | 0,5293 | 0,0016 | 0 |
| LBA1      | 27023 | 721,9652 | 0,533  | 0,0016 | 0 |
| TSPAN32   | 46323 | 721,8477 | 0,5344 | 0,0016 | 0 |
| PDE4B     | 38456 | 729,7662 | 0,5392 | 0,0016 | 0 |
| NPHP3     | 36842 | 739,7927 | 0,5443 | 0,0016 | 0 |
| HCG2P7    | 11710 | 736,0473 | 0,5456 | 0,0016 | 0 |
| PLEKHA2   | 39127 | 709,0649 | 0,5462 | 0,0016 | 0 |
| PRKCE     | 39841 | 739,9932 | 0,5465 | 0,0016 | 0 |
| ZNF83     | 48708 | 734,9023 | 0,5537 | 0,0016 | 0 |
| LOC441087 | 28720 | 697,797  | 0,5541 | 0,0016 | 0 |
| H3F3B     | 11629 | 735,4405 | 0,5556 | 0,0016 | 0 |
| CTPS2     | 6575  | 711,4931 | 0,5643 | 0,0016 | 0 |

|           |       |          |        |        |   |
|-----------|-------|----------|--------|--------|---|
| ZBTB4     | 47810 | 710,7343 | 0,5658 | 0,0016 | 0 |
| SH3GLB2   | 42602 | 720,3416 | 0,5669 | 0,0016 | 0 |
| ETS1      | 8576  | 720,3892 | 0,5716 | 0,0016 | 0 |
| ISG20     | 25721 | 785,2054 | 0,5032 | 0,0017 | 0 |
| PIK3IP1   | 38902 | 762,5093 | 0,5204 | 0,0017 | 0 |
| HS.539623 | 17588 | 776,7645 | 0,5218 | 0,0017 | 0 |
| ATM       | 1811  | 760,6822 | 0,5402 | 0,0017 | 0 |
| ABR       | 198   | 760,6228 | 0,5448 | 0,0017 | 0 |
| PTPRCAP   | 40300 | 790,6574 | 0,5479 | 0,0017 | 0 |
| TP53INP1  | 45891 | 745,4116 | 0,5492 | 0,0017 | 0 |
| ZBTB20    | 47796 | 808,1667 | 0,5522 | 0,0017 | 0 |
| QSOX2     | 40437 | 769,1821 | 0,5538 | 0,0017 | 0 |
| SLC25A28  | 42946 | 770,7344 | 0,5568 | 0,0017 | 0 |
| PLEKHG1   | 39144 | 763,5715 | 0,5583 | 0,0017 | 0 |
| LOC727820 | 33566 | 804,9341 | 0,5613 | 0,0017 | 0 |
| ABCA1     | 62    | 759,2879 | 0,5632 | 0,0017 | 0 |
| DMC1      | 7499  | 796,6131 | 0,5651 | 0,0017 | 0 |
| LOC728499 | 33672 | 754,3613 | 0,5653 | 0,0017 | 0 |
| RBM33     | 40828 | 787,4372 | 0,5689 | 0,0017 | 0 |
| ATM       | 1812  | 796,4125 | 0,5712 | 0,0017 | 0 |
| TMEM17    | 45505 | 800,7531 | 0,5721 | 0,0017 | 0 |
| KIAA0430  | 26218 | 794,7701 | 0,574  | 0,0017 | 0 |
| CDKN2D    | 5214  | 801,2115 | 0,5757 | 0,0017 | 0 |
| LOC652493 | 32727 | 752,741  | 0,7551 | 0,0017 | 0 |
| CXCR3     | 6670  | 793,4784 | 0,5289 | 0,0018 | 0 |
| ARHGEF3   | 1476  | 824,8146 | 0,549  | 0,0018 | 0 |
| HSPA6     | 25018 | 822,9394 | 0,5519 | 0,0018 | 0 |
| E2F5      | 7969  | 783,8758 | 0,5576 | 0,0018 | 0 |
| B3GALT4   | 2062  | 813,6009 | 0,5663 | 0,0018 | 0 |
| EFHC1     | 8100  | 779,8691 | 0,5663 | 0,0018 | 0 |
| ZNF439    | 48340 | 781,7603 | 0,5663 | 0,0018 | 0 |
| HS.105618 | 12321 | 794,6713 | 0,5728 | 0,0018 | 0 |
| GABBR1    | 10416 | 811,009  | 0,5796 | 0,0018 | 0 |
| CDC2L6    | 5081  | 820,6605 | 0,5871 | 0,0018 | 0 |
| PTPRO     | 40316 | 834,9118 | 0,5371 | 0,0019 | 0 |
| HS.202577 | 14068 | 850,0995 | 0,5468 | 0,0019 | 0 |
| DYRK2     | 7947  | 846,5314 | 0,5473 | 0,0019 | 0 |
| ZMAT3     | 48002 | 827,8721 | 0,5572 | 0,0019 | 0 |
| CD79B     | 5012  | 832,9967 | 0,5612 | 0,0019 | 0 |
| CATSPER2  | 4499  | 850,3246 | 0,5632 | 0,0019 | 0 |
| PSCD4     | 40027 | 849,1563 | 0,5635 | 0,0019 | 0 |
| IFI44L    | 25206 | 848,8051 | 0,564  | 0,0019 | 0 |
| GUCY2C    | 11568 | 833,6456 | 0,5649 | 0,0019 | 0 |
| NME3      | 36691 | 835,5449 | 0,5663 | 0,0019 | 0 |
| EID2B     | 8161  | 847,2622 | 0,5667 | 0,0019 | 0 |
| MCM8      | 34909 | 849,7441 | 0,5778 | 0,0019 | 0 |
| PCMTD2    | 38368 | 848,592  | 0,578  | 0,0019 | 0 |

|            |       |          |        |        |   |
|------------|-------|----------|--------|--------|---|
| TRAF5      | 45988 | 819,183  | 0,5801 | 0,0019 | 0 |
| KLF13      | 26584 | 834,6927 | 0,5804 | 0,0019 | 0 |
| MGC24039   | 35166 | 827,7184 | 0,5843 | 0,0019 | 0 |
| USPL1      | 47067 | 851,8199 | 0,5872 | 0,0019 | 0 |
| DCK        | 6963  | 856,6514 | 0,552  | 0,002  | 0 |
| SGSM2      | 42562 | 864,5909 | 0,5589 | 0,002  | 0 |
| ZBED5      | 47785 | 866,262  | 0,5735 | 0,002  | 0 |
| IFFO       | 25200 | 857,6609 | 0,5753 | 0,002  | 0 |
| C14ORF24   | 2964  | 857,0198 | 0,5797 | 0,002  | 0 |
| ZBTB4      | 47809 | 863,6756 | 0,5879 | 0,002  | 0 |
| SSH2       | 44108 | 856,6651 | 0,5951 | 0,002  | 0 |
| IL11RA     | 25366 | 877,8292 | 0,5678 | 0,0021 | 0 |
| PSMD12     | 40115 | 873,7402 | 0,5679 | 0,0021 | 0 |
| ZBED5      | 47784 | 871,2064 | 0,5694 | 0,0021 | 0 |
| TIMP2      | 45267 | 879,0525 | 0,5839 | 0,0021 | 0 |
| KIAA0999   | 26284 | 874,3629 | 0,5932 | 0,0021 | 0 |
| FLJ45244   | 9968  | 880,2999 | 0,5935 | 0,0021 | 0 |
| PAN2       | 38059 | 878,8658 | 0,5973 | 0,0021 | 0 |
| NCF4       | 36297 | 888,4701 | 0,5657 | 0,0022 | 0 |
| ZNF14      | 48059 | 886,87   | 0,5691 | 0,0022 | 0 |
| TRAK1      | 45997 | 889,5107 | 0,578  | 0,0022 | 0 |
| C6ORF111   | 3874  | 879,2948 | 0,5794 | 0,0022 | 0 |
| CBLN3      | 4529  | 888,1048 | 0,5891 | 0,0022 | 0 |
| SP110      | 43757 | 890,4806 | 0,5909 | 0,0022 | 0 |
| SGCE       | 42535 | 888,8427 | 0,5954 | 0,0022 | 0 |
| TMEM107    | 45412 | 904,1285 | 0,5576 | 0,0023 | 0 |
| PLAC8      | 39064 | 896,3388 | 0,5652 | 0,0023 | 0 |
| CAT        | 4496  | 896,1984 | 0,5672 | 0,0023 | 0 |
| KCNH6      | 25993 | 908,1981 | 0,5763 | 0,0023 | 0 |
| MBD4       | 34832 | 902,5611 | 0,5787 | 0,0023 | 0 |
| ALPP       | 914   | 897,7728 | 0,585  | 0,0023 | 0 |
| C5ORF39    | 3853  | 901,9171 | 0,5905 | 0,0023 | 0 |
| PNPLA7     | 39298 | 912,3181 | 0,5596 | 0,0024 | 0 |
| BCL11A     | 2245  | 906,5434 | 0,5726 | 0,0024 | 0 |
| CHRNA5     | 5552  | 909,5687 | 0,5731 | 0,0024 | 0 |
| CCDC106    | 4579  | 906,6024 | 0,5909 | 0,0024 | 0 |
| PLA2G7     | 39054 | 927,6571 | 0,559  | 0,0025 | 0 |
| LOC643031  | 29517 | 920,9601 | 0,569  | 0,0025 | 0 |
| CDKN2AIPNL | 5206  | 931,1105 | 0,5819 | 0,0025 | 0 |
| CLK4       | 5770  | 919,8496 | 0,5889 | 0,0025 | 0 |
| ADAM28     | 421   | 918,8663 | 0,5945 | 0,0025 | 0 |
| WDR33      | 47394 | 921,7182 | 0,5961 | 0,0025 | 0 |
| MMP9       | 35467 | 934,2122 | 0,6443 | 0,0025 | 0 |
| JUN        | 25888 | 948,0736 | 0,5564 | 0,0026 | 0 |
| ADHFE1     | 530   | 964,3191 | 0,5648 | 0,0026 | 0 |
| SNORD16    | 43537 | 956,8975 | 0,5664 | 0,0026 | 0 |
| TMEM77     | 45628 | 940,7301 | 0,5665 | 0,0026 | 0 |

|           |       |           |        |        |   |
|-----------|-------|-----------|--------|--------|---|
| FCGRT     | 9324  | 947,9867  | 0,5696 | 0,0026 | 0 |
| LOC338758 | 27828 | 940,6674  | 0,5708 | 0,0026 | 0 |
| GPM6A     | 11122 | 956,9545  | 0,5721 | 0,0026 | 0 |
| ARGLU1    | 1406  | 928,2397  | 0,5726 | 0,0026 | 0 |
| PKIA      | 38997 | 929,0931  | 0,5731 | 0,0026 | 0 |
| CCDC88A   | 4736  | 932,105   | 0,5742 | 0,0026 | 0 |
| BTN3A1    | 2598  | 946,6473  | 0,5783 | 0,0026 | 0 |
| BBS2      | 2189  | 944,6975  | 0,5792 | 0,0026 | 0 |
| AFF3      | 602   | 968,1148  | 0,5809 | 0,0026 | 0 |
| NLRP8     | 36672 | 933,1459  | 0,581  | 0,0026 | 0 |
| CCDC14    | 4621  | 958,2131  | 0,5826 | 0,0026 | 0 |
| SPTLC1    | 44013 | 964,9858  | 0,5827 | 0,0026 | 0 |
| FGR       | 9466  | 940,1051  | 0,5834 | 0,0026 | 0 |
| TRAF3IP3  | 45981 | 950,3658  | 0,5853 | 0,0026 | 0 |
| FKBP14    | 9506  | 942,5138  | 0,5875 | 0,0026 | 0 |
| HSD17B7   | 24964 | 950,7752  | 0,5894 | 0,0026 | 0 |
| SDHALP1   | 42158 | 932,197   | 0,59   | 0,0026 | 0 |
| BACH2     | 2111  | 960,8712  | 0,5901 | 0,0026 | 0 |
| SLAMF6    | 42773 | 945,896   | 0,5914 | 0,0026 | 0 |
| STX16     | 44364 | 947,0828  | 0,5963 | 0,0026 | 0 |
| FCHSD2    | 9329  | 951,1266  | 0,5967 | 0,0026 | 0 |
| ZNF615    | 48525 | 951,4432  | 0,5984 | 0,0026 | 0 |
| RBL2      | 40794 | 957,5449  | 0,6034 | 0,0026 | 0 |
| UBA7      | 46636 | 950,481   | 0,6041 | 0,0026 | 0 |
| LOC729446 | 33801 | 944,4     | 0,6072 | 0,0026 | 0 |
| SYPL1     | 44559 | 965,7952  | 0,5656 | 0,0027 | 0 |
| FAM119A   | 8799  | 971,0134  | 0,5892 | 0,0027 | 0 |
| DAPP1     | 6903  | 975,8928  | 0,5832 | 0,0028 | 0 |
| GLTSCR2   | 10908 | 980,4843  | 0,6059 | 0,0028 | 0 |
| MARCKSL1  | 34756 | 984,4341  | 0,5914 | 0,0029 | 0 |
| SLA       | 42766 | 984,0961  | 0,5958 | 0,0029 | 0 |
| TNFSF10   | 45760 | 990,5175  | 0,5818 | 0,003  | 0 |
| RCP9      | 40930 | 989,4909  | 0,5886 | 0,003  | 0 |
| RCSD1     | 40933 | 988,12    | 0,6049 | 0,003  | 0 |
| KIAA1370  | 26343 | 992,2828  | 0,5868 | 0,0031 | 0 |
| CMIP      | 5827  | 997,6028  | 0,5888 | 0,0031 | 0 |
| ADD3      | 517   | 1002,1612 | 0,5893 | 0,0031 | 0 |
| NUAK2     | 37060 | 1001,6395 | 0,5965 | 0,0031 | 0 |
| NCF1B     | 36292 | 1001,5385 | 0,612  | 0,0031 | 0 |
| RN7SK     | 41264 | 1000,2322 | 0,5571 | 0,0032 | 0 |
| YPEL2     | 47732 | 1009,4353 | 0,5727 | 0,0032 | 0 |
| HSH2D     | 24989 | 1001,2538 | 0,5835 | 0,0032 | 0 |
| CREB1     | 6247  | 1011,198  | 0,5886 | 0,0032 | 0 |
| VAMP1     | 47104 | 1006,6433 | 0,5898 | 0,0032 | 0 |
| LOC645895 | 30721 | 1006,6179 | 0,6019 | 0,0032 | 0 |
| UCP2      | 46798 | 1017,0674 | 0,5513 | 0,0033 | 0 |
| PAQR8     | 38098 | 1024,5094 | 0,5656 | 0,0033 | 0 |

|           |       |           |        |        |   |
|-----------|-------|-----------|--------|--------|---|
| ZFP36L2   | 47938 | 1023,8808 | 0,5695 | 0,0033 | 0 |
| LYSMD2    | 34414 | 1029,3014 | 0,5859 | 0,0033 | 0 |
| SEMA3E    | 42261 | 1025,7517 | 0,5927 | 0,0033 | 0 |
| APBB3     | 1265  | 1024,5578 | 0,5951 | 0,0033 | 0 |
| HS.572649 | 22943 | 1024,8862 | 0,5958 | 0,0033 | 0 |
| ZNF69     | 48609 | 1029,249  | 0,5988 | 0,0033 | 0 |
| LOC399900 | 28332 | 1013,4938 | 0,5998 | 0,0033 | 0 |
| ADA       | 393   | 1020,6544 | 0,6119 | 0,0033 | 0 |
| LOC647450 | 31278 | 1021,4005 | 0,7713 | 0,0033 | 0 |
| PIM1      | 38922 | 1037,781  | 0,5834 | 0,0034 | 0 |
| CDKN1B    | 5198  | 1030,3221 | 0,588  | 0,0034 | 0 |
| AMT       | 978   | 1039,2432 | 0,5939 | 0,0034 | 0 |
| ADD3      | 519   | 1043,6925 | 0,5951 | 0,0034 | 0 |
| CHD9      | 5466  | 1041,1566 | 0,5976 | 0,0034 | 0 |
| FKTN      | 9539  | 1030,8683 | 0,6023 | 0,0034 | 0 |
| SERTAD2   | 42418 | 1037,2944 | 0,6122 | 0,0034 | 0 |
| LTA4H     | 34324 | 1052,7357 | 0,5768 | 0,0036 | 0 |
| PFAAP5    | 38640 | 1054,2608 | 0,5836 | 0,0036 | 0 |
| HS.535028 | 16910 | 1056,46   | 0,6023 | 0,0037 | 0 |
| LAX1      | 27021 | 1059,8089 | 0,5866 | 0,0038 | 0 |
| EP400     | 8385  | 1063,7682 | 0,6205 | 0,0039 | 0 |
| EBI2      | 7985  | 1075,8538 | 0,5345 | 0,004  | 0 |
| PLA2G4B   | 39044 | 1072,7071 | 0,5905 | 0,004  | 0 |
| ZNF394    | 48298 | 1070,9835 | 0,5907 | 0,004  | 0 |
| SCARNA9   | 42021 | 1070,1552 | 0,5953 | 0,004  | 0 |
| ZMYM1     | 48010 | 1070,5073 | 0,599  | 0,004  | 0 |
| TTC14     | 46377 | 1075,9855 | 0,5999 | 0,004  | 0 |
| CYP27A1   | 6790  | 1077,3339 | 0,6071 | 0,004  | 0 |
| PDCD6IP   | 38430 | 1079,7228 | 0,6143 | 0,004  | 0 |
| ZBTB34    | 47804 | 1075,4436 | 0,6211 | 0,004  | 0 |
| NOD2      | 36730 | 1091,5325 | 0,587  | 0,0041 | 0 |
| TBC1D10C  | 44762 | 1082,318  | 0,5898 | 0,0041 | 0 |
| XPNPEP3   | 47670 | 1085,1973 | 0,5928 | 0,0041 | 0 |
| C8ORF37   | 4048  | 1086,1001 | 0,6033 | 0,0041 | 0 |
| SEPW1     | 42339 | 1080,7291 | 0,6166 | 0,0041 | 0 |
| KIAA1545  | 26372 | 1081,145  | 0,6193 | 0,0041 | 0 |
| SSBP4     | 44105 | 1091,6138 | 0,6199 | 0,0041 | 0 |
| ANKRA2    | 1055  | 1090,4431 | 0,5941 | 0,0042 | 0 |
| TOMM7     | 45850 | 1090,123  | 0,6078 | 0,0042 | 0 |
| CCBE1     | 4562  | 1090,0615 | 0,6103 | 0,0042 | 0 |
| ZNF486    | 48386 | 1101,8662 | 0,6086 | 0,0044 | 0 |
| LOC401152 | 28431 | 1100,2848 | 0,6149 | 0,0044 | 0 |
| C14ORF85  | 2994  | 1116,8405 | 0,6031 | 0,0045 | 0 |
| FAM73A    | 9025  | 1115,9826 | 0,6073 | 0,0045 | 0 |
| C9ORF80   | 4186  | 1109,0546 | 0,6145 | 0,0045 | 0 |
| ZNF154    | 48067 | 1118,3233 | 0,621  | 0,0045 | 0 |
| HS.356079 | 15128 | 1113,8065 | 0,6222 | 0,0045 | 0 |

|           |       |           |        |        |          |
|-----------|-------|-----------|--------|--------|----------|
| ABCA6     | 76    | 1108,7661 | 0,6493 | 0,0045 | 0        |
| KIAA0125  | 26170 | 1109,0933 | 0,6677 | 0,0045 | 0        |
| CRBN      | 6242  | 1133,7151 | 0,6077 | 0,0046 | 0        |
| LRAP      | 34128 | 1130,1694 | 0,6103 | 0,0046 | 0        |
| YPEL5     | 47735 | 1130,9147 | 0,6142 | 0,0046 | 0        |
| CD47      | 4981  | 1133,1836 | 0,6171 | 0,0046 | 0        |
| HBB       | 11683 | 1131,8095 | 0,7103 | 0,0046 | 0        |
| C8ORF45   | 4055  | 1137,6638 | 0,5972 | 0,0047 | 0        |
| TTC32     | 46403 | 1141,3498 | 0,6003 | 0,0047 | 0        |
| ANKRA2    | 1056  | 1141,7207 | 0,6013 | 0,0047 | 0        |
| BCL11A    | 2246  | 1145,0862 | 0,6013 | 0,0048 | 0        |
| TMEM50B   | 45598 | 1144,8012 | 0,6186 | 0,0048 | 0        |
| CEP110    | 5329  | 1143,5533 | 0,6205 | 0,0048 | 0        |
| SLC46A3   | 43184 | 1145,3887 | 0,6313 | 0,0048 | 0        |
| TRIB1     | 46042 | 1148,9601 | 0,5983 | 0,0049 | 0        |
| ZNF682    | 48602 | 1150,4418 | 0,6039 | 0,0049 | 0        |
| COL4A3    | 6008  | 1151,3386 | 0,6045 | 0,0049 | 0        |
| FAM39E    | 8945  | 1151,7374 | 0,6142 | 0,0049 | 0        |
| RN7SK     | 41265 | 1157,9788 | 0,5944 | 0,005  | 0        |
| HSD17B11  | 24954 | 1155,5417 | 0,597  | 0,005  | 0        |
| MGC16075  | 35154 | 1156,9634 | 0,5974 | 0,005  | 0        |
| KIAA1407  | 26349 | 1158,6457 | 0,6093 | 0,005  | 0        |
| DOPEY2    | 7689  | 1167,2737 | 0,6176 | 0,005  | 0        |
| PRC1      | 39727 | 1167,1844 | 0,5732 | 0,0051 | 0        |
| TYROBP    | 46610 | 1165,3952 | 0,5957 | 0,0051 | 0        |
| KIAA1751  | 26419 | 1168,9294 | 0,6051 | 0,0051 | 0        |
| TANK      | 44692 | 1172,9856 | 0,6125 | 0,0051 | 0        |
| RBM17     | 40810 | 1173,5077 | 0,6194 | 0,0051 | 0        |
| HSPC268   | 25041 | 1172,0895 | 0,6259 | 0,0051 | 0        |
| PSCD1     | 40022 | 1176,1233 | 0,6325 | 0,0051 | 0        |
| HS.544637 | 19153 | 1181,5421 | 0,6123 | 0,0052 | 0        |
| PDCD7     | 38432 | 1185,9445 | 0,6253 | 0,0052 | 0        |
| GSDML     | 11439 | 1180,5791 | 0,6295 | 0,0052 | 0        |
| SPSB3     | 43998 | 1185,493  | 0,621  | 0,0053 | 0        |
| FBXO15    | 9211  | 1194,357  | 0,565  | 0,0054 | 0        |
| CYP1B1    | 6778  | 1193,2992 | 0,5933 | 0,0054 | 0        |
| STAT1     | 44253 | 1204,1366 | 0,5916 | 0,0055 | 0        |
| IL10      | 25359 | 1207,3971 | 0,6182 | 0,0055 | 0        |
| CASP4     | 4462  | 1201,3123 | 0,6216 | 0,0055 | 0        |
| HS.444683 | 15971 | 1202,9663 | 0,632  | 0,0055 | 0        |
| RERE      | 41004 | 1209,2768 | 0,6275 | 0,0056 | 0        |
| TRIM33    | 46090 | 1213,6466 | 0,6344 | 0,0056 | 0        |
| PRKAA1    | 39807 | 1212,2372 | 0,6367 | 0,0056 | 0        |
| ANKRD49   | 1134  | 1219,5764 | 0,6166 | 0,0057 | 1,00E-04 |
| GRIPAP1   | 11395 | 1227,1326 | 0,62   | 0,0057 | 1,00E-04 |
| LOC651309 | 32358 | 1227,0717 | 0,6224 | 0,0057 | 1,00E-04 |
| FAM65A    | 9007  | 1225,6993 | 0,6287 | 0,0057 | 1,00E-04 |

|           |       |           |        |        |          |
|-----------|-------|-----------|--------|--------|----------|
| LRIG1     | 34147 | 1224,7102 | 0,6407 | 0,0057 | 1,00E-04 |
| TMEM80    | 45631 | 1235,7892 | 0,599  | 0,0058 | 1,00E-04 |
| ZNF211    | 48124 | 1230,0668 | 0,6124 | 0,0058 | 1,00E-04 |
| C14ORF153 | 2942  | 1237,998  | 0,6178 | 0,0058 | 1,00E-04 |
| CYP2U1    | 6816  | 1232,4998 | 0,6244 | 0,0058 | 1,00E-04 |
| SLAMF6    | 42772 | 1234,9168 | 0,6398 | 0,0058 | 1,00E-04 |
| GRAP      | 11318 | 1242,1488 | 0,5935 | 0,0059 | 1,00E-04 |
| RAB37     | 40502 | 1232,1665 | 0,6259 | 0,0059 | 1,00E-04 |
| PTK2      | 40220 | 1243,61   | 0,6365 | 0,0059 | 1,00E-04 |
| AUTS2     | 2028  | 1250,7542 | 0,5993 | 0,006  | 1,00E-04 |
| OR13A1    | 37394 | 1254,1032 | 0,6142 | 0,006  | 1,00E-04 |
| CEACAM1   | 5254  | 1263,4892 | 0,5912 | 0,0061 | 1,00E-04 |
| UNC84B    | 46906 | 1261,3622 | 0,613  | 0,0061 | 1,00E-04 |
| PNPT1     | 39303 | 1261,5252 | 0,6201 | 0,0061 | 1,00E-04 |
| CD79B     | 5011  | 1261,8022 | 0,6275 | 0,0061 | 1,00E-04 |
| JSRP1     | 25882 | 1258,4556 | 0,6276 | 0,0061 | 1,00E-04 |
| UBE2J1    | 46695 | 1258,8505 | 0,6303 | 0,0061 | 1,00E-04 |
| GORASP1   | 11063 | 1266,7551 | 0,6336 | 0,0061 | 1,00E-04 |
| TOP2B     | 45862 | 1256,4765 | 0,6386 | 0,0061 | 1,00E-04 |
| SLFN11    | 43319 | 1269,4592 | 0,6096 | 0,0062 | 1,00E-04 |
| ATP2A3    | 1866  | 1266,6339 | 0,6279 | 0,0062 | 1,00E-04 |
| ADAMTS6   | 467   | 1265,97   | 0,6324 | 0,0062 | 1,00E-04 |
| VNN2      | 47219 | 1276,7833 | 0,5966 | 0,0064 | 1,00E-04 |
| ANTXR2    | 1174  | 1279,7729 | 0,6194 | 0,0065 | 1,00E-04 |
| OCIAD1    | 37220 | 1288,5574 | 0,6245 | 0,0065 | 1,00E-04 |
| KLHDC9    | 26612 | 1278,7387 | 0,6371 | 0,0065 | 1,00E-04 |
| VAV3      | 47134 | 1287,6822 | 0,6724 | 0,0065 | 1,00E-04 |
| IGLL1     | 25311 | 1278,7309 | 0,7586 | 0,0065 | 1,00E-04 |
| OMA1      | 37291 | 1285,8652 | 0,6143 | 0,0066 | 1,00E-04 |
| HS.556082 | 20461 | 1293,2939 | 0,6177 | 0,0066 | 1,00E-04 |
| MEF2C     | 34996 | 1295,2343 | 0,624  | 0,0066 | 1,00E-04 |
| EPS15     | 8450  | 1293,1497 | 0,6278 | 0,0066 | 1,00E-04 |
| ATP2B4    | 1878  | 1292,1333 | 0,6282 | 0,0066 | 1,00E-04 |
| FAM115A   | 8793  | 1296,603  | 0,6311 | 0,0066 | 1,00E-04 |
| CDAN1     | 5046  | 1285,4828 | 0,6337 | 0,0066 | 1,00E-04 |
| RPS4Y1    | 41666 | 1295,7108 | 0,852  | 0,0066 | 1,00E-04 |
| TTC14     | 46378 | 1300,8995 | 0,6231 | 0,0067 | 1,00E-04 |
| ARHGAP20  | 1421  | 1315,697  | 0,62   | 0,0068 | 1,00E-04 |
| SHCBP1    | 42636 | 1315,4599 | 0,6272 | 0,0068 | 1,00E-04 |
| AIRE      | 717   | 1316,3613 | 0,6272 | 0,0068 | 1,00E-04 |
| CD79B     | 5010  | 1313,7441 | 0,6305 | 0,0068 | 1,00E-04 |
| CREB1     | 6245  | 1316,0246 | 0,6306 | 0,0068 | 1,00E-04 |
| C2ORF64   | 3706  | 1306,9    | 0,6315 | 0,0068 | 1,00E-04 |
| MGC29891  | 35181 | 1314,6765 | 0,6396 | 0,0068 | 1,00E-04 |
| TRABD     | 45968 | 1323,8629 | 0,625  | 0,0069 | 1,00E-04 |
| LOC729776 | 33832 | 1328,9088 | 0,6418 | 0,0069 | 1,00E-04 |
| BCOR      | 2291  | 1325,6118 | 0,6482 | 0,0069 | 1,00E-04 |



|           |       |           |        |        |          |
|-----------|-------|-----------|--------|--------|----------|
| LYST      | 34419 | 1327,9978 | 0,6083 | 0,007  | 1,00E-04 |
| ETS1      | 8577  | 1328,8945 | 0,6315 | 0,007  | 1,00E-04 |
| FAM39DP   | 8940  | 1329,3846 | 0,6319 | 0,007  | 1,00E-04 |
| FAM46C    | 8964  | 1333,436  | 0,621  | 0,0071 | 1,00E-04 |
| PARP3     | 38132 | 1333,8838 | 0,6285 | 0,0071 | 1,00E-04 |
| TUG1      | 46541 | 1332,6792 | 0,6309 | 0,0071 | 1,00E-04 |
| NBPF3     | 36251 | 1336,6578 | 0,6452 | 0,0071 | 1,00E-04 |
| RAPGEF3   | 40682 | 1342,3004 | 0,5998 | 0,0072 | 1,00E-04 |
| VASH1     | 47124 | 1342,1099 | 0,7368 | 0,0072 | 1,00E-04 |
| LOC653086 | 32991 | 1347,4684 | 0,6294 | 0,0073 | 1,00E-04 |
| USP24     | 47014 | 1346,9467 | 0,6305 | 0,0073 | 1,00E-04 |
| RUNDC2C   | 41813 | 1345,9912 | 0,637  | 0,0073 | 1,00E-04 |
| TESC      | 45037 | 1358,4088 | 0,5929 | 0,0074 | 1,00E-04 |
| C12ORF35  | 2832  | 1357,3927 | 0,6222 | 0,0074 | 1,00E-04 |
| BLZF1     | 2390  | 1359,4114 | 0,6295 | 0,0074 | 1,00E-04 |
| PRPF4B    | 39940 | 1360,6155 | 0,6465 | 0,0074 | 1,00E-04 |
| MPHOSPH1  | 35540 | 1359,9216 | 0,6119 | 0,0075 | 1,00E-04 |
| ST3GAL5   | 44166 | 1368,9697 | 0,6256 | 0,0075 | 1,00E-04 |
| ARHGAP24  | 1429  | 1368,5432 | 0,6326 | 0,0075 | 1,00E-04 |
| ZNF430    | 48330 | 1374,3773 | 0,6327 | 0,0076 | 1,00E-04 |
| KIAA0256  | 26189 | 1370,2749 | 0,636  | 0,0076 | 1,00E-04 |
| NSUN5C    | 37011 | 1375,6557 | 0,645  | 0,0076 | 1,00E-04 |
| C11ORF80  | 2813  | 1377,6517 | 0,6043 | 0,0077 | 1,00E-04 |
| SYNE2     | 44531 | 1381,7918 | 0,6202 | 0,0077 | 1,00E-04 |
| TLR6      | 45321 | 1380,1263 | 0,6373 | 0,0077 | 1,00E-04 |
| PHF1      | 38751 | 1384,1203 | 0,6486 | 0,0078 | 1,00E-04 |
| GSTM2     | 11472 | 1389,5682 | 0,72   | 0,0078 | 1,00E-04 |
| TDP1      | 44984 | 1394,2238 | 0,6297 | 0,0079 | 1,00E-04 |
| PDE4C     | 38461 | 1399,5915 | 0,6369 | 0,008  | 1,00E-04 |
| LMBRD1    | 27310 | 1403,7792 | 0,6084 | 0,0081 | 1,00E-04 |
| C14ORF106 | 2897  | 1413,2342 | 0,6109 | 0,0081 | 1,00E-04 |
| C4ORF34   | 3814  | 1413,3308 | 0,6506 | 0,0081 | 1,00E-04 |
| BLK       | 2378  | 1412,3386 | 0,6157 | 0,0082 | 1,00E-04 |
| C1QTNF6   | 3455  | 1410,5423 | 0,6212 | 0,0082 | 1,00E-04 |
| LOC221442 | 27604 | 1412,3992 | 0,631  | 0,0082 | 1,00E-04 |
| MXD4      | 35963 | 1407,061  | 0,6337 | 0,0082 | 1,00E-04 |
| C5ORF25   | 3837  | 1415,8755 | 0,6443 | 0,0082 | 1,00E-04 |
| POU2AF1   | 39435 | 1416,5488 | 0,6456 | 0,0082 | 1,00E-04 |
| RSBN1     | 41734 | 1423,4929 | 0,6342 | 0,0083 | 1,00E-04 |
| LOC132241 | 27408 | 1423,2095 | 0,6457 | 0,0083 | 1,00E-04 |
| MTIF3     | 35855 | 1428,1294 | 0,6309 | 0,0084 | 1,00E-04 |
| CD46      | 4980  | 1426,0512 | 0,6411 | 0,0084 | 1,00E-04 |
| KIAA1683  | 26407 | 1431,9357 | 0,6552 | 0,0084 | 1,00E-04 |
| P2RY10    | 37945 | 1440,3092 | 0,617  | 0,0085 | 1,00E-04 |
| HS.163084 | 13661 | 1438,6965 | 0,653  | 0,0085 | 1,00E-04 |
| HHEX      | 11855 | 1444,0778 | 0,6192 | 0,0086 | 1,00E-04 |
| CXCR7     | 6677  | 1449,3502 | 0,646  | 0,0086 | 1,00E-04 |

|           |       |           |        |        |          |
|-----------|-------|-----------|--------|--------|----------|
| SLC16A12  | 42824 | 1448,7895 | 0,6469 | 0,0086 | 1,00E-04 |
| DGKA      | 7239  | 1449,1361 | 0,6532 | 0,0086 | 1,00E-04 |
| DUXAP3    | 7910  | 1457,9755 | 0,6191 | 0,0087 | 1,00E-04 |
| BCL3      | 2271  | 1461,8299 | 0,6452 | 0,0087 | 1,00E-04 |
| CAPRIN2   | 4409  | 1462,4421 | 0,6642 | 0,0087 | 1,00E-04 |
| RTP4      | 41798 | 1465,6549 | 0,6323 | 0,0088 | 1,00E-04 |
| PMAIP1    | 39224 | 1470,4943 | 0,6143 | 0,0089 | 1,00E-04 |
| CNN3      | 5885  | 1475,1387 | 0,6171 | 0,009  | 1,00E-04 |
| MAP1LC3A  | 34608 | 1477,3559 | 0,6491 | 0,0091 | 1,00E-04 |
| HS.22689  | 14306 | 1481,3541 | 0,648  | 0,0093 | 1,00E-04 |
| ADAM29    | 423   | 1491,0254 | 0,5709 | 0,0095 | 1,00E-04 |
| PHIP      | 38798 | 1492,0065 | 0,6423 | 0,0095 | 1,00E-04 |
| TMEM106B  | 45408 | 1495,8427 | 0,6425 | 0,0095 | 1,00E-04 |
| HS.406106 | 15516 | 1496,8113 | 0,6534 | 0,0095 | 1,00E-04 |
| ARL17P1   | 1518  | 1488,2665 | 0,6599 | 0,0095 | 1,00E-04 |
| LOC731985 | 34001 | 1491,5947 | 0,6607 | 0,0095 | 1,00E-04 |
| GPM6A     | 11121 | 1498,6607 | 0,6245 | 0,0096 | 1,00E-04 |
| RASGRP3   | 40733 | 1498,9046 | 0,6414 | 0,0096 | 1,00E-04 |
| SPINT2    | 43933 | 1513,2044 | 0,6284 | 0,0098 | 1,00E-04 |
| ATHL1     | 1807  | 1513,4264 | 0,631  | 0,0098 | 1,00E-04 |
| FHDC1     | 9470  | 1510,3033 | 0,6415 | 0,0098 | 1,00E-04 |
| OGT       | 37264 | 1519,1319 | 0,6616 | 0,0099 | 1,00E-04 |
| HS.508889 | 16406 | 1530,4121 | 0,6211 | 0,01   | 1,00E-04 |
| HS.5724   | 22923 | 1524,8921 | 0,6261 | 0,01   | 1,00E-04 |
| CD5       | 4984  | 1527,9545 | 0,628  | 0,01   | 1,00E-04 |
| FLJ46309  | 10010 | 1521,1869 | 0,6442 | 0,01   | 1,00E-04 |
| FCGR2B    | 9318  | 1530,8832 | 0,651  | 0,01   | 1,00E-04 |
| OGT       | 37265 | 1524,906  | 0,652  | 0,01   | 1,00E-04 |
| FAM39DP   | 8943  | 1529,4391 | 0,6562 | 0,01   | 1,00E-04 |
| LAPTM5    | 26982 | 1527,9884 | 0,6659 | 0,01   | 1,00E-04 |
| BIRC3     | 2365  | 1531,0847 | 0,6751 | 0,01   | 1,00E-04 |
| PPA2      | 39460 | 1533,0047 | 0,6467 | 0,0101 | 1,00E-04 |
| LOC649841 | 31941 | 1532,4239 | 0,653  | 0,0101 | 1,00E-04 |
| SMCHD1    | 43407 | 1539,1591 | 0,6435 | 0,0102 | 1,00E-04 |
| C5ORF28   | 3839  | 1540,7186 | 0,6499 | 0,0103 | 1,00E-04 |
| TOMM7     | 45849 | 1539,7438 | 0,6588 | 0,0103 | 1,00E-04 |
| CSAD      | 6359  | 1542,3294 | 0,6645 | 0,0103 | 1,00E-04 |
| GGA1      | 10737 | 1543,7353 | 0,6626 | 0,0104 | 1,00E-04 |
| CCR6      | 4866  | 1551,5724 | 0,6284 | 0,0106 | 1,00E-04 |
| PRKAA1    | 39808 | 1555,6054 | 0,6512 | 0,0106 | 1,00E-04 |
| ICAM3     | 25154 | 1550,5499 | 0,6553 | 0,0106 | 1,00E-04 |
| HS.193784 | 13906 | 1562,2854 | 0,6216 | 0,0107 | 1,00E-04 |
| ZNF451    | 48353 | 1557,9215 | 0,6429 | 0,0107 | 1,00E-04 |
| CDC42SE2  | 5103  | 1564,5272 | 0,6483 | 0,0107 | 1,00E-04 |
| LOC729603 | 33815 | 1563,404  | 0,6569 | 0,0107 | 1,00E-04 |
| FCAR      | 9298  | 1560,5575 | 0,6596 | 0,0107 | 1,00E-04 |
| CBX4      | 4548  | 1564,1739 | 0,6597 | 0,0107 | 1,00E-04 |

|           |       |           |        |        |          |
|-----------|-------|-----------|--------|--------|----------|
| LOC51149  | 28913 | 1557,7542 | 0,6671 | 0,0107 | 1,00E-04 |
| JARID1D   | 25850 | 1564,0111 | 0,782  | 0,0107 | 1,00E-04 |
| PAN3      | 38060 | 1576,5558 | 0,6436 | 0,0108 | 1,00E-04 |
| CORO1B    | 6103  | 1580,6109 | 0,647  | 0,0108 | 1,00E-04 |
| LMOD3     | 27331 | 1568,3139 | 0,6478 | 0,0108 | 1,00E-04 |
| SLC44A4   | 43170 | 1581,3586 | 0,6513 | 0,0108 | 1,00E-04 |
| GUSBL1    | 11577 | 1582,5317 | 0,6597 | 0,0108 | 1,00E-04 |
| ABHD3     | 169   | 1574,3846 | 0,6602 | 0,0108 | 1,00E-04 |
| MX2       | 35960 | 1574,4739 | 0,6664 | 0,0108 | 1,00E-04 |
| PLEKHA1   | 39124 | 1577,6997 | 0,6672 | 0,0108 | 1,00E-04 |
| PTPN22    | 40274 | 1574,0079 | 0,6674 | 0,0108 | 1,00E-04 |
| ABCA6     | 77    | 1573,0942 | 0,6742 | 0,0108 | 1,00E-04 |
| BCYRN1    | 2302  | 1572,6932 | 0,6534 | 0,0109 | 1,00E-04 |
| CWF19L2   | 6646  | 1570,9754 | 0,6537 | 0,0109 | 1,00E-04 |
| PBXIP1    | 38193 | 1583,0622 | 0,6577 | 0,0109 | 1,00E-04 |
| CBLB      | 4523  | 1571,0493 | 0,6692 | 0,0109 | 1,00E-04 |
| FAM53B    | 8982  | 1593,0826 | 0,6365 | 0,011  | 1,00E-04 |
| C1ORF176  | 3332  | 1598,6065 | 0,6479 | 0,011  | 1,00E-04 |
| PARP3     | 38133 | 1590,0446 | 0,6483 | 0,011  | 1,00E-04 |
| C21ORF81  | 3629  | 1594,175  | 0,6494 | 0,011  | 1,00E-04 |
| HS.440088 | 15858 | 1587,9748 | 0,6495 | 0,011  | 1,00E-04 |
| LILRB1    | 27229 | 1590,1787 | 0,6548 | 0,011  | 1,00E-04 |
| INADL     | 25552 | 1597,272  | 0,6607 | 0,011  | 1,00E-04 |
| TMEM156   | 45470 | 1596,6542 | 0,662  | 0,011  | 1,00E-04 |
| MPPE1     | 35558 | 1594,8855 | 0,666  | 0,011  | 1,00E-04 |
| FLJ40142  | 9848  | 1597,0666 | 0,6683 | 0,011  | 1,00E-04 |
| TNFRSF13B | 45737 | 1595,6608 | 0,8016 | 0,011  | 1,00E-04 |
| P2RY10    | 37946 | 1601,8937 | 0,634  | 0,0111 | 1,00E-04 |
| CCL2      | 4766  | 1602,8298 | 0,6354 | 0,0111 | 1,00E-04 |
| CDKN1B    | 5199  | 1610,5719 | 0,6498 | 0,0111 | 1,00E-04 |
| HS.436134 | 15728 | 1599,7786 | 0,6582 | 0,0111 | 1,00E-04 |
| CUGBP2    | 6622  | 1608,0798 | 0,6605 | 0,0111 | 1,00E-04 |
| DYRK1A    | 7940  | 1604,2086 | 0,6638 | 0,0111 | 1,00E-04 |
| SNX10     | 43611 | 1605,3832 | 0,6671 | 0,0111 | 1,00E-04 |
| SYNJ2BP   | 44547 | 1608,3128 | 0,6742 | 0,0111 | 1,00E-04 |
| IFI44     | 25205 | 1613,4226 | 0,6904 | 0,0112 | 1,00E-04 |
| TMEM50B   | 45597 | 1616,5954 | 0,6598 | 0,0113 | 1,00E-04 |
| APOBEC3F  | 1305  | 1625,2937 | 0,6265 | 0,0114 | 1,00E-04 |
| NT5C3     | 37021 | 1628,3421 | 0,6415 | 0,0115 | 1,00E-04 |
| RCOR3     | 40929 | 1624,3583 | 0,6503 | 0,0115 | 1,00E-04 |
| TNFRSF13C | 45738 | 1633,6661 | 0,6469 | 0,0116 | 1,00E-04 |
| ANKRD30B  | 1105  | 1632,0846 | 0,6492 | 0,0116 | 1,00E-04 |
| BCL11A    | 2244  | 1630,075  | 0,6533 | 0,0116 | 1,00E-04 |
| RAB3IP    | 40515 | 1633,5528 | 0,6593 | 0,0116 | 1,00E-04 |
| CAPRIN2   | 4408  | 1630,7881 | 0,6754 | 0,0116 | 1,00E-04 |
| METTL7A   | 35072 | 1646,6776 | 0,6553 | 0,0117 | 2,00E-04 |
| KIAA0494  | 26222 | 1643,6063 | 0,6608 | 0,0117 | 1,00E-04 |

|           |       |           |        |        |          |
|-----------|-------|-----------|--------|--------|----------|
| LOC649923 | 31961 | 1645,4799 | 0,6637 | 0,0117 | 1,00E-04 |
| GRK5      | 11402 | 1649,8415 | 0,6589 | 0,0119 | 2,00E-04 |
| DYRK2     | 7948  | 1653,4534 | 0,6538 | 0,012  | 2,00E-04 |
| RPS29     | 41657 | 1656,9696 | 0,6755 | 0,012  | 2,00E-04 |
| SLC6A16   | 43234 | 1667,397  | 0,6637 | 0,0124 | 2,00E-04 |
| LOC652694 | 32844 | 1666,5303 | 0,8685 | 0,0124 | 2,00E-04 |
| DIDO1     | 7345  | 1668,6977 | 0,6537 | 0,0125 | 2,00E-04 |
| CYFIP2    | 6752  | 1668,6081 | 0,657  | 0,0125 | 2,00E-04 |
| GPX1      | 11299 | 1674,8938 | 0,6597 | 0,0125 | 2,00E-04 |
| PGCP      | 38693 | 1669,6282 | 0,6626 | 0,0125 | 2,00E-04 |
| ATP2B4    | 1877  | 1672,1429 | 0,6682 | 0,0125 | 2,00E-04 |
| SPG11     | 43886 | 1672,3284 | 0,6694 | 0,0125 | 2,00E-04 |
| CEP192    | 5342  | 1671,5673 | 0,6705 | 0,0125 | 2,00E-04 |
| LOC23117  | 27618 | 1670,0384 | 0,6843 | 0,0125 | 2,00E-04 |
| C14ORF28  | 2967  | 1681,3243 | 0,6333 | 0,0126 | 2,00E-04 |
| ERAP2     | 8469  | 1677,3841 | 0,6487 | 0,0126 | 2,00E-04 |
| IFIT3     | 25215 | 1685,1627 | 0,652  | 0,0126 | 2,00E-04 |
| RAXL1     | 40770 | 1679,3052 | 0,6549 | 0,0126 | 2,00E-04 |
| C5ORF5    | 3861  | 1680,0053 | 0,655  | 0,0126 | 2,00E-04 |
| FAM39DP   | 8941  | 1681,6819 | 0,6566 | 0,0126 | 2,00E-04 |
| KIAA0240  | 26183 | 1685,6814 | 0,6598 | 0,0126 | 2,00E-04 |
| HS.137971 | 13118 | 1680,8466 | 0,6619 | 0,0126 | 2,00E-04 |
| C20ORF72  | 3552  | 1674,7363 | 0,6648 | 0,0126 | 2,00E-04 |
| HBP1      | 11691 | 1674,8152 | 0,6722 | 0,0126 | 2,00E-04 |
| COX19     | 6123  | 1680,012  | 0,6745 | 0,0126 | 2,00E-04 |
| P2RX1     | 37929 | 1683,5344 | 0,6821 | 0,0126 | 2,00E-04 |
| ALS2CR13  | 922   | 1684,7453 | 0,6404 | 0,0127 | 2,00E-04 |
| COL9A3    | 6037  | 1692,6329 | 0,6556 | 0,0127 | 2,00E-04 |
| LOC728014 | 33600 | 1686,633  | 0,6782 | 0,0127 | 2,00E-04 |
| GSTM1     | 11470 | 1691,9358 | 0,7466 | 0,0127 | 2,00E-04 |
| TSC22D3   | 46265 | 1694,7152 | 0,635  | 0,0128 | 2,00E-04 |
| FLJ44124  | 9938  | 1695,7571 | 0,6522 | 0,0128 | 2,00E-04 |
| BAZ2B     | 2182  | 1695,5056 | 0,6655 | 0,0128 | 2,00E-04 |
| HS.413494 | 15556 | 1697,7056 | 0,6646 | 0,0129 | 2,00E-04 |
| HS.279842 | 14636 | 1699,6778 | 0,6537 | 0,013  | 2,00E-04 |
| ZNF480    | 48378 | 1703,9222 | 0,655  | 0,013  | 2,00E-04 |
| ZNF10     | 48032 | 1703,9474 | 0,6637 | 0,013  | 2,00E-04 |
| HIVEP1    | 11989 | 1700,0355 | 0,6704 | 0,013  | 2,00E-04 |
| FAM89B    | 9073  | 1705,6681 | 0,653  | 0,0131 | 2,00E-04 |
| AHR       | 690   | 1706,5803 | 0,6588 | 0,0131 | 2,00E-04 |
| MKNK2     | 35359 | 1705,8029 | 0,6708 | 0,0131 | 2,00E-04 |
| KNTC1     | 26710 | 1705,9969 | 0,68   | 0,0131 | 2,00E-04 |
| PHKB      | 38804 | 1712,3111 | 0,6387 | 0,0132 | 2,00E-04 |
| FAM76B    | 9033  | 1711,6326 | 0,6641 | 0,0132 | 2,00E-04 |
| SPEN      | 43882 | 1709,8835 | 0,6718 | 0,0132 | 2,00E-04 |
| CDC40     | 5085  | 1710,2096 | 0,6743 | 0,0132 | 2,00E-04 |
| DUT       | 7899  | 1710,2296 | 0,678  | 0,0132 | 2,00E-04 |

|           |       |           |        |        |          |
|-----------|-------|-----------|--------|--------|----------|
| C11ORF35  | 2758  | 1721,7711 | 0,6672 | 0,0134 | 2,00E-04 |
| CD27      | 4935  | 1732,9702 | 0,6308 | 0,0136 | 2,00E-04 |
| HS.554324 | 20336 | 1728,6266 | 0,633  | 0,0136 | 2,00E-04 |
| SIAH1     | 42673 | 1728,973  | 0,6514 | 0,0136 | 2,00E-04 |
| PARP12    | 38125 | 1728,008  | 0,6578 | 0,0136 | 2,00E-04 |
| IFIT1     | 25210 | 1728,6488 | 0,6598 | 0,0136 | 2,00E-04 |
| ETV6      | 8587  | 1729,4623 | 0,6625 | 0,0136 | 2,00E-04 |
| STIM2     | 44290 | 1727,1891 | 0,6658 | 0,0136 | 2,00E-04 |
| PTPN22    | 40276 | 1731,727  | 0,6673 | 0,0136 | 2,00E-04 |
| POLR3GL   | 39393 | 1731,1729 | 0,6674 | 0,0136 | 2,00E-04 |
| DTWD2     | 7834  | 1733,3876 | 0,6686 | 0,0136 | 2,00E-04 |
| FGD2      | 9398  | 1734,9192 | 0,6738 | 0,0136 | 2,00E-04 |
| CRYZL1    | 6354  | 1731,167  | 0,6759 | 0,0136 | 2,00E-04 |
| FCRL2     | 9337  | 1730,6118 | 0,7157 | 0,0136 | 2,00E-04 |
| TCFL5     | 44934 | 1738,4044 | 0,6542 | 0,0137 | 2,00E-04 |
| KMO       | 26705 | 1738,0542 | 0,663  | 0,0137 | 2,00E-04 |
| FBXO21    | 9222  | 1748,6733 | 0,6591 | 0,0141 | 2,00E-04 |
| AFG3L1    | 605   | 1752,0946 | 0,6741 | 0,0142 | 2,00E-04 |
| C5ORF41   | 3857  | 1758,976  | 0,6464 | 0,0144 | 2,00E-04 |
| DDX17     | 7059  | 1759,5285 | 0,6627 | 0,0144 | 2,00E-04 |
| CDK5RAP3  | 5181  | 1761,4301 | 0,6672 | 0,0144 | 2,00E-04 |
| TNRC6B    | 45821 | 1760,4999 | 0,6724 | 0,0144 | 2,00E-04 |
| CXCL16    | 6661  | 1765,2042 | 0,6748 | 0,0144 | 2,00E-04 |
| SELM      | 42246 | 1767,8589 | 0,6407 | 0,0145 | 2,00E-04 |
| HS.143408 | 13148 | 1769,3494 | 0,6494 | 0,0145 | 2,00E-04 |
| GNB5      | 10984 | 1772,7244 | 0,6741 | 0,0145 | 2,00E-04 |
| DUT       | 7900  | 1768,429  | 0,6769 | 0,0145 | 2,00E-04 |
| LOC728888 | 33730 | 1771,4295 | 0,6865 | 0,0145 | 2,00E-04 |
| IL1B      | 25417 | 1770,3843 | 0,8648 | 0,0145 | 2,00E-04 |
| PTPN22    | 40277 | 1774,1036 | 0,6445 | 0,0146 | 2,00E-04 |
| PQLC3     | 39690 | 1776,2078 | 0,6632 | 0,0146 | 2,00E-04 |
| DYRK1A    | 7943  | 1773,3734 | 0,6832 | 0,0146 | 2,00E-04 |
| HS.542993 | 18510 | 1780,173  | 0,6687 | 0,0147 | 2,00E-04 |
| GLYATL2   | 10920 | 1781,3244 | 0,6776 | 0,0147 | 2,00E-04 |
| ZDHHC17   | 47889 | 1782,1367 | 0,6802 | 0,0147 | 2,00E-04 |
| CTSL1     | 6601  | 1784,1798 | 0,6295 | 0,0148 | 2,00E-04 |
| LIPT1     | 27291 | 1784,7224 | 0,6556 | 0,0148 | 2,00E-04 |
| DYRK2     | 7949  | 1782,3945 | 0,6767 | 0,0148 | 2,00E-04 |
| MON2      | 35507 | 1781,0523 | 0,6858 | 0,0148 | 2,00E-04 |
| ASIP      | 1714  | 1785,975  | 0,6556 | 0,0149 | 2,00E-04 |
| CLK1      | 5759  | 1788,7241 | 0,6707 | 0,0149 | 2,00E-04 |
| AES       | 587   | 1790,3515 | 0,6588 | 0,015  | 2,00E-04 |
| IL16      | 25384 | 1796,9204 | 0,6532 | 0,0152 | 2,00E-04 |
| CCDC24    | 4644  | 1801,5391 | 0,6621 | 0,0152 | 2,00E-04 |
| DNAJB2    | 7570  | 1799,7331 | 0,6686 | 0,0152 | 2,00E-04 |
| FAIM3     | 8744  | 1804,7424 | 0,6617 | 0,0153 | 2,00E-04 |
| LOC389517 | 28135 | 1807,286  | 0,6773 | 0,0154 | 2,00E-04 |

|           |       |           |        |        |          |
|-----------|-------|-----------|--------|--------|----------|
| IL4R      | 25496 | 1810,3493 | 0,6638 | 0,0155 | 2,00E-04 |
| ACACB     | 211   | 1815,932  | 0,6552 | 0,0156 | 2,00E-04 |
| ARHGAP24  | 1430  | 1816,1593 | 0,6743 | 0,0156 | 2,00E-04 |
| MZF1      | 36114 | 1817,337  | 0,6821 | 0,0157 | 2,00E-04 |
| USP34     | 47028 | 1826,026  | 0,6812 | 0,0159 | 2,00E-04 |
| AK3       | 726   | 1829,9974 | 0,6595 | 0,016  | 2,00E-04 |
| ZNF443    | 48346 | 1830,5331 | 0,6663 | 0,016  | 2,00E-04 |
| RPS15A    | 41626 | 1827,8586 | 0,6669 | 0,016  | 2,00E-04 |
| RPS24     | 41638 | 1836,5083 | 0,6627 | 0,0162 | 2,00E-04 |
| BIRC3     | 2364  | 1837,1201 | 0,6648 | 0,0162 | 2,00E-04 |
| FCGR2B    | 9317  | 1838,3775 | 0,6683 | 0,0162 | 2,00E-04 |
| SEC62     | 42228 | 1837,7209 | 0,6786 | 0,0162 | 2,00E-04 |
| VHL       | 47190 | 1840,2885 | 0,6888 | 0,0162 | 2,00E-04 |
| MAP4K2    | 34666 | 1838,8984 | 0,6955 | 0,0162 | 2,00E-04 |
| HEATR5B   | 11770 | 1847,1472 | 0,6746 | 0,0165 | 2,00E-04 |
| ITGB1     | 25765 | 1850,9143 | 0,6577 | 0,0167 | 3,00E-04 |
| IGFBP4    | 25297 | 1852,6761 | 0,6675 | 0,0167 | 3,00E-04 |
| LOC728014 | 33601 | 1851,045  | 0,6782 | 0,0167 | 3,00E-04 |
| MAP4K4    | 34670 | 1858,6168 | 0,6901 | 0,0169 | 3,00E-04 |
| FGL2      | 9465  | 1863,7425 | 0,6947 | 0,0169 | 3,00E-04 |
| LEF1      | 27113 | 1859,6462 | 0,7263 | 0,0169 | 3,00E-04 |
| CD82      | 5015  | 1866,8091 | 0,6464 | 0,017  | 3,00E-04 |
| MST1      | 35793 | 1863,1261 | 0,6667 | 0,017  | 3,00E-04 |
| RBM5      | 40851 | 1863,4459 | 0,679  | 0,017  | 3,00E-04 |
| PNRC2     | 39305 | 1866,3083 | 0,6841 | 0,017  | 3,00E-04 |
| C21ORF7   | 3622  | 1880,784  | 0,6379 | 0,0172 | 3,00E-04 |
| HS.13291  | 13001 | 1876,7228 | 0,6464 | 0,0172 | 3,00E-04 |
| PYCARD    | 40398 | 1878,0055 | 0,6523 | 0,0172 | 3,00E-04 |
| HS.163426 | 13665 | 1879,9854 | 0,658  | 0,0172 | 3,00E-04 |
| HS.580797 | 24088 | 1872,7971 | 0,6699 | 0,0172 | 3,00E-04 |
| STAG3L1   | 44217 | 1872,6887 | 0,6812 | 0,0172 | 3,00E-04 |
| BANK1     | 2149  | 1877,2521 | 0,6849 | 0,0172 | 3,00E-04 |
| B4GALT1   | 2086  | 1875,7616 | 0,6928 | 0,0172 | 3,00E-04 |
| GPBP1     | 11094 | 1884,8406 | 0,682  | 0,0173 | 3,00E-04 |
| ZNF550    | 48444 | 1884,6718 | 0,6873 | 0,0173 | 3,00E-04 |
| ZNF342    | 48265 | 1882,8888 | 0,6877 | 0,0173 | 3,00E-04 |
| HS.4988   | 16347 | 1889,2699 | 0,6632 | 0,0175 | 3,00E-04 |
| ALDH3A2   | 831   | 1896,0824 | 0,6628 | 0,0176 | 3,00E-04 |
| SFRS5     | 42504 | 1895,9794 | 0,6672 | 0,0176 | 3,00E-04 |
| UPF3A     | 46935 | 1893,9535 | 0,6741 | 0,0176 | 3,00E-04 |
| HS.561844 | 20991 | 1903,1346 | 0,6826 | 0,0178 | 3,00E-04 |
| PNN       | 39288 | 1905,1115 | 0,6757 | 0,0179 | 3,00E-04 |
| STAG3L2   | 44220 | 1918,7676 | 0,6805 | 0,0183 | 3,00E-04 |
| ZNF230    | 48146 | 1914,2487 | 0,6807 | 0,0183 | 3,00E-04 |
| SPG7      | 43897 | 1917,7323 | 0,6853 | 0,0183 | 3,00E-04 |
| RDH5      | 40945 | 1914,8454 | 0,6974 | 0,0183 | 3,00E-04 |
| LOC648470 | 31565 | 1922,9462 | 0,6677 | 0,0184 | 3,00E-04 |

|           |       |           |        |        |          |
|-----------|-------|-----------|--------|--------|----------|
| HS.550293 | 19920 | 1919,977  | 0,6746 | 0,0184 | 3,00E-04 |
| KIAA0040  | 26163 | 1926,2697 | 0,6747 | 0,0184 | 3,00E-04 |
| CNN2      | 5884  | 1924,6089 | 0,6783 | 0,0184 | 3,00E-04 |
| HS.542027 | 18238 | 1925,5663 | 0,6809 | 0,0184 | 3,00E-04 |
| PHACS     | 38730 | 1924,6751 | 0,6817 | 0,0184 | 3,00E-04 |
| NCF4      | 36296 | 1921,8528 | 0,6911 | 0,0184 | 3,00E-04 |
| LOC648405 | 31552 | 1929,0268 | 0,703  | 0,0185 | 3,00E-04 |
| C8ORF70   | 4070  | 1932,6155 | 0,6629 | 0,0186 | 3,00E-04 |
| HS.572538 | 22933 | 1934,1213 | 0,6947 | 0,0186 | 3,00E-04 |
| NKTR      | 36620 | 1936,6732 | 0,6831 | 0,0187 | 3,00E-04 |
| TPD52     | 45902 | 1939,2379 | 0,6542 | 0,0188 | 3,00E-04 |
| ARHGEF6   | 1480  | 1943,626  | 0,6656 | 0,0188 | 3,00E-04 |
| ELF2      | 8261  | 1941,9669 | 0,6672 | 0,0188 | 3,00E-04 |
| LAG3      | 26934 | 1941,4271 | 0,7386 | 0,0188 | 3,00E-04 |
| TRRAP     | 46245 | 1944,9707 | 0,6856 | 0,0189 | 3,00E-04 |
| DHRS1     | 7277  | 1948,5821 | 0,684  | 0,019  | 3,00E-04 |
| FIG4      | 9486  | 1946,3353 | 0,6864 | 0,019  | 3,00E-04 |
| CHKB      | 5491  | 1952,5664 | 0,6791 | 0,0191 | 3,00E-04 |
| AGXT2L2   | 677   | 1950,1134 | 0,6901 | 0,0191 | 3,00E-04 |
| XAF1      | 47620 | 1954,6682 | 0,6597 | 0,0192 | 3,00E-04 |
| SIDT2     | 42679 | 1961,2234 | 0,6548 | 0,0193 | 3,00E-04 |
| MYO5C     | 36081 | 1964,2286 | 0,662  | 0,0193 | 3,00E-04 |
| EPSTI1    | 8462  | 1964,9599 | 0,6653 | 0,0193 | 3,00E-04 |
| JMJD1C    | 25857 | 1958,9878 | 0,6714 | 0,0193 | 3,00E-04 |
| SMAD5     | 43364 | 1956,6167 | 0,674  | 0,0193 | 3,00E-04 |
| DDR1      | 7035  | 1964,9609 | 0,6795 | 0,0193 | 3,00E-04 |
| CDK5RAP2  | 5177  | 1957,5864 | 0,6875 | 0,0193 | 3,00E-04 |
| MGC39372  | 35208 | 1962,2784 | 0,6913 | 0,0193 | 3,00E-04 |
| PFDN5     | 38646 | 1971,204  | 0,6626 | 0,0195 | 3,00E-04 |
| CD55      | 4988  | 1970,9369 | 0,6644 | 0,0195 | 3,00E-04 |
| RPL17     | 41522 | 1973,5538 | 0,6701 | 0,0195 | 3,00E-04 |
| SERPINF1  | 42409 | 1971,5999 | 0,6768 | 0,0195 | 3,00E-04 |
| ARHGAP24  | 1427  | 1979,2628 | 0,6862 | 0,0196 | 3,00E-04 |
| ZNF217    | 48130 | 1977,5848 | 0,6865 | 0,0196 | 3,00E-04 |
| LOC643977 | 29927 | 1980,38   | 0,6947 | 0,0196 | 3,00E-04 |
| NASP      | 36199 | 1975,8592 | 0,7004 | 0,0196 | 3,00E-04 |
| RAB6IP1   | 40537 | 1978,6789 | 0,7023 | 0,0196 | 3,00E-04 |
| GBP4      | 10613 | 1978,0659 | 0,7377 | 0,0196 | 3,00E-04 |
| IKZF1     | 25351 | 1985,1213 | 0,6772 | 0,0197 | 3,00E-04 |
| FNBP4     | 10078 | 1985,4514 | 0,6812 | 0,0197 | 3,00E-04 |
| LUC7L     | 34348 | 1982,0671 | 0,6892 | 0,0197 | 3,00E-04 |
| CSF2RA    | 6383  | 1991,4124 | 0,672  | 0,0199 | 3,00E-04 |
| SP3       | 43765 | 1991,9792 | 0,6836 | 0,0199 | 3,00E-04 |
| FAM98C    | 9103  | 1992,0896 | 0,6887 | 0,0199 | 3,00E-04 |
| DDX60     | 7109  | 1991,37   | 0,6895 | 0,0199 | 3,00E-04 |
| DDX58     | 7104  | 1995,278  | 0,6955 | 0,0199 | 3,00E-04 |
| CTDSP2    | 6524  | 1996,3027 | 0,704  | 0,0199 | 3,00E-04 |

|           |       |           |        |        |          |
|-----------|-------|-----------|--------|--------|----------|
| HNRPDL    | 12132 | 2002,3391 | 0,673  | 0,02   | 3,00E-04 |
| SLC2A5    | 43038 | 2002,9901 | 0,6853 | 0,02   | 3,00E-04 |
| C15ORF48  | 3026  | 2002,704  | 0,6864 | 0,02   | 3,00E-04 |
| NSUN5     | 37005 | 2005,1405 | 0,6834 | 0,0201 | 3,00E-04 |
| ZNF540    | 48432 | 2001,7153 | 0,6968 | 0,0201 | 3,00E-04 |
| XPC       | 47666 | 2008,7061 | 0,6896 | 0,0202 | 3,00E-04 |
| FAM46A    | 8962  | 2007,7768 | 0,7761 | 0,0202 | 3,00E-04 |
| ZNF518B   | 48415 | 2011,7191 | 0,6793 | 0,0203 | 3,00E-04 |
| UNC84A    | 46905 | 2010,9949 | 0,686  | 0,0203 | 3,00E-04 |
| LOC400027 | 28341 | 2022,6216 | 0,6843 | 0,0207 | 3,00E-04 |
| IFNGR2    | 25252 | 2022,8754 | 0,6942 | 0,0207 | 3,00E-04 |
| CHCHD7    | 5450  | 2020,6707 | 0,6976 | 0,0207 | 3,00E-04 |
| ZNF223    | 48136 | 2023,8413 | 0,6893 | 0,0208 | 4,00E-04 |
| AHSA2     | 694   | 2026,3757 | 0,6955 | 0,0208 | 4,00E-04 |
| SMARCB1   | 43382 | 2027,9682 | 0,6833 | 0,0209 | 4,00E-04 |
| PDLIM1    | 38527 | 2029,4905 | 0,6958 | 0,0209 | 4,00E-04 |
| BCL11A    | 2243  | 2034,5427 | 0,6768 | 0,021  | 4,00E-04 |
| ZNF266    | 48176 | 2038,1723 | 0,6782 | 0,0211 | 4,00E-04 |
| USP49     | 47052 | 2040,7886 | 0,6774 | 0,0212 | 4,00E-04 |
| LEF1      | 27114 | 2044,2786 | 0,7281 | 0,0213 | 4,00E-04 |
| C9ORF103  | 4090  | 2048,7325 | 0,6828 | 0,0214 | 4,00E-04 |
| TMEM175   | 45511 | 2048,1998 | 0,6922 | 0,0214 | 4,00E-04 |
| KLF11     | 26578 | 2052,9074 | 0,6907 | 0,0216 | 4,00E-04 |
| TAF1C     | 44654 | 2063,9842 | 0,6906 | 0,0221 | 4,00E-04 |
| PUM2      | 40346 | 2066,7194 | 0,6853 | 0,0223 | 4,00E-04 |
| TMEM80    | 45632 | 2071,6041 | 0,6635 | 0,0224 | 4,00E-04 |
| FCGR2B    | 9316  | 2074,4852 | 0,6774 | 0,0225 | 4,00E-04 |
| HS.158923 | 13580 | 2071,4597 | 0,6833 | 0,0225 | 4,00E-04 |
| LOC54103  | 28917 | 2071,071  | 0,7013 | 0,0225 | 4,00E-04 |
| HS.572642 | 22940 | 2078,1815 | 0,6989 | 0,0226 | 4,00E-04 |
| MTSS1     | 35900 | 2080,067  | 0,6711 | 0,0227 | 4,00E-04 |
| ZNF189    | 48099 | 2080,4351 | 0,7096 | 0,0227 | 4,00E-04 |
| STAT1     | 44254 | 2083,6794 | 0,6825 | 0,0228 | 4,00E-04 |
| DUSP22    | 7881  | 2088,2317 | 0,6732 | 0,023  | 4,00E-04 |
| BTN3A3    | 2601  | 2092,4628 | 0,6793 | 0,023  | 4,00E-04 |
| DIP2C     | 7362  | 2088,8161 | 0,6828 | 0,023  | 4,00E-04 |
| ITPR3     | 25821 | 2091,2938 | 0,6869 | 0,023  | 4,00E-04 |
| ZNF91     | 48713 | 2094,4429 | 0,687  | 0,023  | 4,00E-04 |
| SPG3A     | 43893 | 2093,2939 | 0,6947 | 0,023  | 4,00E-04 |
| ARRDC5    | 1618  | 2090,8343 | 0,7253 | 0,023  | 4,00E-04 |
| FMOD      | 10067 | 2092,102  | 0,7562 | 0,023  | 4,00E-04 |
| CCDC109B  | 4585  | 2096,3903 | 0,6714 | 0,0231 | 4,00E-04 |
| CHPT1     | 5525  | 2098,3392 | 0,6823 | 0,0231 | 4,00E-04 |
| SETBP1    | 42428 | 2102,6346 | 0,6768 | 0,0233 | 4,00E-04 |
| SYK       | 44515 | 2107,65   | 0,6894 | 0,0235 | 4,00E-04 |
| HS.126768 | 12656 | 2115,1778 | 0,6944 | 0,0238 | 4,00E-04 |
| IL8       | 25511 | 2113,3653 | 0,7337 | 0,0238 | 4,00E-04 |



|           |       |           |        |        |          |
|-----------|-------|-----------|--------|--------|----------|
| ITGB1     | 25767 | 2117,8491 | 0,681  | 0,0239 | 4,00E-04 |
| ARL6IP5   | 1545  | 2118,3634 | 0,6909 | 0,0239 | 4,00E-04 |
| HS.545615 | 19499 | 2115,0813 | 0,7034 | 0,0239 | 4,00E-04 |
| ARRDC2    | 1613  | 2118,7528 | 0,6959 | 0,024  | 4,00E-04 |
| C5ORF41   | 3858  | 2124,0127 | 0,6662 | 0,0241 | 4,00E-04 |
| PILRB     | 38919 | 2124,169  | 0,6947 | 0,0241 | 4,00E-04 |
| C1ORF186  | 3342  | 2127,1692 | 0,6956 | 0,0242 | 4,00E-04 |
| SERPINI1  | 42415 | 2129,504  | 0,6712 | 0,0243 | 4,00E-04 |
| SYTL2     | 44593 | 2134,0379 | 0,6718 | 0,0244 | 4,00E-04 |
| SH3BGR1   | 42586 | 2133,477  | 0,688  | 0,0244 | 4,00E-04 |
| RUNX1     | 41818 | 2131,1432 | 0,7122 | 0,0244 | 4,00E-04 |
| CLSTN1    | 5793  | 2137,4289 | 0,6793 | 0,0245 | 4,00E-04 |
| ZNF302    | 48221 | 2136,4674 | 0,6944 | 0,0245 | 4,00E-04 |
| HS.231861 | 14315 | 2136,4799 | 0,6954 | 0,0245 | 4,00E-04 |
| LOC613037 | 28950 | 2136,0651 | 0,7336 | 0,0245 | 4,00E-04 |
| ITGB1     | 25766 | 2140,4143 | 0,6648 | 0,0246 | 4,00E-04 |
| LOC652616 | 32793 | 2142,3079 | 0,7046 | 0,0247 | 4,00E-04 |
| SNRP70    | 43574 | 2145,8422 | 0,7048 | 0,0249 | 4,00E-04 |
| LHFPL2    | 27187 | 2148,1937 | 0,6871 | 0,025  | 4,00E-04 |
| SLC16A5   | 42834 | 2150,0425 | 0,7119 | 0,0251 | 5,00E-04 |
| APPL2     | 1343  | 2150,75   | 0,7207 | 0,0251 | 5,00E-04 |
| LOC648852 | 31677 | 2156,586  | 0,6887 | 0,0254 | 5,00E-04 |
| TMEM134   | 45443 | 2155,6244 | 0,6896 | 0,0254 | 5,00E-04 |
| ITPR1     | 25819 | 2155,9061 | 0,6984 | 0,0254 | 5,00E-04 |
| PIP5K2B   | 38943 | 2159,235  | 0,6904 | 0,0255 | 5,00E-04 |
| C20ORF195 | 3517  | 2159,7598 | 0,7026 | 0,0255 | 5,00E-04 |
| SPIB      | 43905 | 2161,7725 | 0,6846 | 0,0256 | 5,00E-04 |
| MMD       | 35421 | 2165,8363 | 0,6898 | 0,0258 | 5,00E-04 |
| RAB31     | 40493 | 2169,445  | 0,6581 | 0,026  | 5,00E-04 |
| IL12A     | 25368 | 2171,477  | 0,6806 | 0,026  | 5,00E-04 |
| GJC1      | 10833 | 2173,4262 | 0,6939 | 0,026  | 5,00E-04 |
| STAG3     | 44216 | 2178,8901 | 0,7572 | 0,0262 | 5,00E-04 |
| CCM2      | 4794  | 2182,5515 | 0,7115 | 0,0264 | 5,00E-04 |
| MORC3     | 35510 | 2187,9972 | 0,6889 | 0,0266 | 5,00E-04 |
| SLC16A4   | 42832 | 2195,8969 | 0,6869 | 0,0269 | 5,00E-04 |
| PGBD2     | 38686 | 2194,7511 | 0,7016 | 0,0269 | 5,00E-04 |
| ALS2CR16  | 924   | 2198,845  | 0,6955 | 0,027  | 5,00E-04 |
| TTC3      | 46397 | 2203,2641 | 0,6796 | 0,0271 | 5,00E-04 |
| MGC3207   | 35192 | 2201,3625 | 0,6891 | 0,0271 | 5,00E-04 |
| C21ORF55  | 3599  | 2199,2215 | 0,6913 | 0,0271 | 5,00E-04 |
| AGPAT5    | 652   | 2205,0613 | 0,7042 | 0,0271 | 5,00E-04 |
| ZNF193    | 48104 | 2203,3124 | 0,7142 | 0,0271 | 5,00E-04 |
| C1ORF66   | 3400  | 2202,7775 | 0,6903 | 0,0272 | 5,00E-04 |
| HS.520349 | 16590 | 2202,3079 | 0,6963 | 0,0272 | 5,00E-04 |
| ECHDC2    | 8006  | 2201,1529 | 0,7043 | 0,0272 | 5,00E-04 |
| USF1      | 46972 | 2203,2099 | 0,705  | 0,0272 | 5,00E-04 |
| ABTB1     | 203   | 2211,655  | 0,6768 | 0,0274 | 5,00E-04 |

|               |       |           |        |        |          |
|---------------|-------|-----------|--------|--------|----------|
| COMMD6        | 6058  | 2212,6553 | 0,6884 | 0,0274 | 5,00E-04 |
| FXVD7         | 10360 | 2213,5085 | 0,6698 | 0,0275 | 5,00E-04 |
| RUNDC2C       | 41812 | 2214,4177 | 0,6951 | 0,0275 | 5,00E-04 |
| KRCC1         | 26726 | 2220,0287 | 0,6949 | 0,0276 | 5,00E-04 |
| ARHGAP24      | 1428  | 2218,9952 | 0,7046 | 0,0276 | 5,00E-04 |
| LOC728734     | 33706 | 2218,127  | 0,6955 | 0,0277 | 5,00E-04 |
| CD6           | 4994  | 2218,9717 | 0,7503 | 0,0277 | 5,00E-04 |
| ANKRD10       | 1059  | 2222,8254 | 0,7041 | 0,0278 | 5,00E-04 |
| RNGTT         | 41417 | 2233,5015 | 0,6836 | 0,0282 | 5,00E-04 |
| SHISA5        | 42649 | 2234,0757 | 0,6965 | 0,0282 | 5,00E-04 |
| SNX1          | 43609 | 2232,7491 | 0,7051 | 0,0282 | 5,00E-04 |
| KIAA0101      | 26169 | 2231,4146 | 0,7108 | 0,0282 | 5,00E-04 |
| ABI1          | 177   | 2239,7869 | 0,6827 | 0,0283 | 5,00E-04 |
| AKR1D1        | 788   | 2236,5245 | 0,6978 | 0,0283 | 5,00E-04 |
| HS.46506      | 16139 | 2238,6819 | 0,7166 | 0,0283 | 5,00E-04 |
| HBA2          | 11682 | 2237,8574 | 0,8537 | 0,0283 | 5,00E-04 |
| CDC16         | 5060  | 2241,8754 | 0,7012 | 0,0284 | 5,00E-04 |
| CGGBP1        | 5425  | 2251,3023 | 0,6868 | 0,0287 | 5,00E-04 |
| SRRM2         | 44087 | 2253,6091 | 0,6994 | 0,0287 | 5,00E-04 |
| SF3B1         | 42459 | 2251,9131 | 0,7012 | 0,0287 | 5,00E-04 |
| HBP1          | 11692 | 2251,8678 | 0,7043 | 0,0287 | 5,00E-04 |
| LOC388969     | 28091 | 2250,918  | 0,7087 | 0,0287 | 5,00E-04 |
| ANKRD13A      | 1063  | 2255,2308 | 0,7071 | 0,0288 | 5,00E-04 |
| ZCCHC11       | 47854 | 2262,2122 | 0,6882 | 0,0291 | 6,00E-04 |
| AP1G2         | 1216  | 2263,8753 | 0,7066 | 0,0291 | 6,00E-04 |
| MSRB2         | 35789 | 2261,1011 | 0,7097 | 0,0291 | 6,00E-04 |
| BMPR2         | 2422  | 2266,5516 | 0,6731 | 0,0292 | 6,00E-04 |
| DKFZP586I1420 | 7412  | 2266,7624 | 0,7038 | 0,0292 | 6,00E-04 |
| ZFP90         | 47946 | 2269,1218 | 0,7037 | 0,0293 | 6,00E-04 |
| HS.565545     | 21828 | 2270,5902 | 0,7052 | 0,0293 | 6,00E-04 |
| MTX3          | 35912 | 2270,8127 | 0,7172 | 0,0293 | 6,00E-04 |
| SELP          | 42248 | 2270,014  | 0,7224 | 0,0293 | 6,00E-04 |
| AIM2          | 712   | 2274,5491 | 0,6756 | 0,0294 | 6,00E-04 |
| NMT2          | 36708 | 2279,1762 | 0,678  | 0,0295 | 6,00E-04 |
| SYNE2         | 44530 | 2278,1061 | 0,6825 | 0,0295 | 6,00E-04 |
| CLDN23        | 5686  | 2278,0711 | 0,6705 | 0,0296 | 6,00E-04 |
| ST6GAL1       | 44174 | 2277,2588 | 0,7022 | 0,0296 | 6,00E-04 |
| BIRC3         | 2366  | 2281,5911 | 0,7317 | 0,0297 | 6,00E-04 |
| CTSL1         | 6600  | 2285,7794 | 0,6851 | 0,0298 | 6,00E-04 |
| ZNF831        | 48709 | 2284,6458 | 0,7037 | 0,0298 | 6,00E-04 |
| CDK5RAP3      | 5179  | 2283,2215 | 0,7182 | 0,0298 | 6,00E-04 |
| ZNF671        | 48590 | 2292,0129 | 0,7034 | 0,03   | 6,00E-04 |
| D2HGDH        | 6865  | 2292,5223 | 0,7035 | 0,03   | 6,00E-04 |
| ENPP2         | 8357  | 2292,5948 | 0,715  | 0,03   | 6,00E-04 |
| ANGEL2        | 1014  | 2295,0897 | 0,6898 | 0,0301 | 6,00E-04 |
| SCRN1         | 42100 | 2296,5599 | 0,6934 | 0,0301 | 6,00E-04 |
| LOC643509     | 29734 | 2294,3265 | 0,7051 | 0,0301 | 6,00E-04 |

|           |       |           |        |        |          |
|-----------|-------|-----------|--------|--------|----------|
| SLC44A1   | 43165 | 2300,1658 | 0,6799 | 0,0302 | 6,00E-04 |
| NPEPL1    | 36829 | 2299,5569 | 0,6924 | 0,0302 | 6,00E-04 |
| ANKRD12   | 1062  | 2302,02   | 0,6806 | 0,0303 | 6,00E-04 |
| C5ORF4    | 3855  | 2305,1656 | 0,7006 | 0,0305 | 6,00E-04 |
| DCLRE1C   | 6972  | 2308,8035 | 0,7022 | 0,0307 | 6,00E-04 |
| SYS1      | 44562 | 2312,2753 | 0,6935 | 0,0308 | 6,00E-04 |
| TOR1AIP1  | 45870 | 2316,0321 | 0,7081 | 0,0309 | 6,00E-04 |
| DUSP22    | 7880  | 2317,4491 | 0,6927 | 0,031  | 6,00E-04 |
| AES       | 588   | 2319,6175 | 0,6987 | 0,031  | 6,00E-04 |
| DACT1     | 6880  | 2315,7286 | 0,7192 | 0,031  | 6,00E-04 |
| CAMK1D    | 4340  | 2322,763  | 0,7027 | 0,0311 | 6,00E-04 |
| SENP7     | 42298 | 2319,5867 | 0,7028 | 0,0311 | 6,00E-04 |
| CXCR5     | 6675  | 2322,3044 | 0,7115 | 0,0311 | 6,00E-04 |
| SLC15A2   | 42817 | 2322,1328 | 0,7141 | 0,0311 | 6,00E-04 |
| C8ORF70   | 4069  | 2328,1854 | 0,6969 | 0,0314 | 6,00E-04 |
| PELI2     | 38597 | 2330,2763 | 0,7252 | 0,0315 | 6,00E-04 |
| LSM14A    | 34295 | 2334,447  | 0,7065 | 0,0316 | 6,00E-04 |
| SIRT1     | 42728 | 2333,1418 | 0,7076 | 0,0316 | 6,00E-04 |
| PIGC      | 38862 | 2334,6296 | 0,7193 | 0,0316 | 6,00E-04 |
| ZNF160    | 48077 | 2338,1118 | 0,7169 | 0,0318 | 6,00E-04 |
| RPS6KA5   | 41681 | 2338,0637 | 0,7007 | 0,0319 | 6,00E-04 |
| GPR1      | 11129 | 2343,1186 | 0,6907 | 0,032  | 6,00E-04 |
| SESN1     | 42423 | 2345,1835 | 0,6968 | 0,0321 | 6,00E-04 |
| LOC338799 | 27830 | 2348,5409 | 0,715  | 0,0322 | 6,00E-04 |
| AKAP11    | 741   | 2346,9552 | 0,7218 | 0,0322 | 6,00E-04 |
| ZNF559    | 48455 | 2352,46   | 0,6867 | 0,0323 | 6,00E-04 |
| REEP5     | 40966 | 2351,7847 | 0,6937 | 0,0323 | 6,00E-04 |
| XRCC2     | 47681 | 2358,0187 | 0,7034 | 0,0325 | 7,00E-04 |
| LOC88523  | 34043 | 2358,8599 | 0,709  | 0,0325 | 7,00E-04 |
| EAF2      | 7976  | 2360,4494 | 0,6945 | 0,0326 | 7,00E-04 |
| NIPBL     | 36595 | 2362,0314 | 0,6973 | 0,0326 | 7,00E-04 |
| LOC644935 | 30386 | 2366,5096 | 0,6994 | 0,0326 | 7,00E-04 |
| SIDT1     | 42678 | 2368,4148 | 0,7015 | 0,0326 | 7,00E-04 |
| NOSIP     | 36780 | 2369,0199 | 0,7024 | 0,0326 | 7,00E-04 |
| CSTF3     | 6473  | 2365,5802 | 0,7047 | 0,0326 | 7,00E-04 |
| SSTR2     | 44124 | 2361,1817 | 0,7081 | 0,0326 | 7,00E-04 |
| TRIM13    | 46050 | 2361,488  | 0,7106 | 0,0326 | 7,00E-04 |
| ZNF239    | 48157 | 2365,9009 | 0,7116 | 0,0326 | 7,00E-04 |
| ST3GAL1   | 44159 | 2364,5074 | 0,7129 | 0,0326 | 7,00E-04 |
| C11ORF46  | 2770  | 2365,5529 | 0,7177 | 0,0326 | 7,00E-04 |
| PIAS1     | 38842 | 2367,5311 | 0,7204 | 0,0326 | 7,00E-04 |
| MYO9B     | 36086 | 2374,9517 | 0,6996 | 0,033  | 7,00E-04 |
| LOC730302 | 33887 | 2376,4326 | 0,7258 | 0,033  | 7,00E-04 |
| GBP1      | 10609 | 2375,1347 | 0,7818 | 0,033  | 7,00E-04 |
| ZNF652    | 48562 | 2378,4763 | 0,7169 | 0,0331 | 7,00E-04 |
| HS.334831 | 15003 | 2376,2861 | 0,7229 | 0,0331 | 7,00E-04 |
| PEG10     | 38594 | 2383,6392 | 0,7097 | 0,0333 | 7,00E-04 |

|           |       |           |        |        |          |
|-----------|-------|-----------|--------|--------|----------|
| LOC492311 | 28901 | 2386,6477 | 0,7015 | 0,0335 | 7,00E-04 |
| LOC653841 | 33391 | 2389,014  | 0,6963 | 0,0337 | 7,00E-04 |
| RRM2B     | 41723 | 2391,696  | 0,7072 | 0,0337 | 7,00E-04 |
| NOD1      | 36729 | 2389,5954 | 0,7077 | 0,0337 | 7,00E-04 |
| RBM12B    | 40804 | 2391,3336 | 0,7143 | 0,0337 | 7,00E-04 |
| MSH3      | 35761 | 2394,8821 | 0,7124 | 0,034  | 7,00E-04 |
| SHROOM4   | 42669 | 2397,4502 | 0,698  | 0,0341 | 7,00E-04 |
| DDX28     | 7076  | 2399,6572 | 0,7021 | 0,0343 | 7,00E-04 |
| SIAH1     | 42676 | 2402,6243 | 0,6928 | 0,0344 | 7,00E-04 |
| CHI3L2    | 5479  | 2416,1712 | 0,6953 | 0,0351 | 7,00E-04 |
| LOC642947 | 29478 | 2417,4271 | 0,7104 | 0,0351 | 7,00E-04 |
| HS.154336 | 13486 | 2416,1027 | 0,6967 | 0,0352 | 7,00E-04 |
| LEMD3     | 27122 | 2421,7509 | 0,7084 | 0,0352 | 7,00E-04 |
| DBNDD1    | 6929  | 2418,9623 | 0,7174 | 0,0352 | 7,00E-04 |
| ZFP37     | 47939 | 2415,7814 | 0,7583 | 0,0352 | 7,00E-04 |
| LOC400464 | 28363 | 2422,2802 | 0,6854 | 0,0353 | 7,00E-04 |
| ADHFE1    | 531   | 2427,2739 | 0,7062 | 0,0355 | 7,00E-04 |
| PLEKHA1   | 39123 | 2433,5    | 0,7176 | 0,0358 | 7,00E-04 |
| RGPD1     | 41105 | 2434,7614 | 0,6773 | 0,0359 | 7,00E-04 |
| ZC3H7A    | 47843 | 2442,7376 | 0,7046 | 0,0363 | 8,00E-04 |
| CSNK1G3   | 6429  | 2442,136  | 0,7166 | 0,0363 | 8,00E-04 |
| UIMC1     | 46866 | 2441,9424 | 0,7198 | 0,0363 | 8,00E-04 |
| TMEM123   | 45426 | 2449,1341 | 0,6881 | 0,0364 | 8,00E-04 |
| CCDC130   | 4610  | 2445,7954 | 0,7056 | 0,0364 | 8,00E-04 |
| RABGAP1   | 40551 | 2448,5767 | 0,7174 | 0,0364 | 8,00E-04 |
| ZBTB5     | 47819 | 2447,4502 | 0,7284 | 0,0364 | 8,00E-04 |
| SNRP70    | 43575 | 2451,0865 | 0,6934 | 0,0366 | 8,00E-04 |
| BBS2      | 2188  | 2452,5146 | 0,7053 | 0,0366 | 8,00E-04 |
| ZBTB24    | 47797 | 2455,3485 | 0,7238 | 0,0367 | 8,00E-04 |
| PLCH2     | 39095 | 2458,0767 | 0,7049 | 0,0368 | 8,00E-04 |
| ST3GAL5   | 44165 | 2458,7076 | 0,7095 | 0,0369 | 8,00E-04 |
| GIT2      | 10807 | 2460,5694 | 0,7041 | 0,037  | 8,00E-04 |
| FOXO1     | 10158 | 2461,6975 | 0,7054 | 0,037  | 8,00E-04 |
| PVRIG     | 40364 | 2461,4318 | 0,7056 | 0,037  | 8,00E-04 |
| ROCK2     | 41443 | 2462,4022 | 0,7088 | 0,037  | 8,00E-04 |
| ROR1      | 41457 | 2467,4432 | 0,7039 | 0,0371 | 8,00E-04 |
| TTC17     | 46381 | 2465,7884 | 0,7219 | 0,0371 | 8,00E-04 |
| CAPN3     | 4395  | 2466,49   | 0,7093 | 0,0372 | 8,00E-04 |
| HS.354359 | 15116 | 2475,4836 | 0,6955 | 0,0374 | 8,00E-04 |
| KIAA0831  | 26266 | 2471,6993 | 0,7162 | 0,0374 | 8,00E-04 |
| LOC400721 | 28384 | 2473,3658 | 0,7216 | 0,0374 | 8,00E-04 |
| HS.568676 | 22410 | 2472,6844 | 0,7231 | 0,0374 | 8,00E-04 |
| TSPYL1    | 46345 | 2476,715  | 0,731  | 0,0374 | 8,00E-04 |
| IL7       | 25507 | 2475,1372 | 0,6954 | 0,0375 | 8,00E-04 |
| LOC653489 | 33229 | 2474,5202 | 0,6987 | 0,0375 | 8,00E-04 |
| JMJD1C    | 25858 | 2471,663  | 0,706  | 0,0375 | 8,00E-04 |
| BTN2A1    | 2593  | 2474,3497 | 0,7147 | 0,0375 | 8,00E-04 |

|           |       |           |        |        |          |
|-----------|-------|-----------|--------|--------|----------|
| C14ORF102 | 2892  | 2479,0673 | 0,7234 | 0,0375 | 8,00E-04 |
| FLJ20489  | 9637  | 2479,1321 | 0,7235 | 0,0375 | 8,00E-04 |
| GNPTG     | 11018 | 2478,884  | 0,7014 | 0,0376 | 8,00E-04 |
| SETD2     | 42431 | 2482,5831 | 0,7041 | 0,0378 | 8,00E-04 |
| CDK5RAP2  | 5176  | 2484,7607 | 0,7124 | 0,0378 | 8,00E-04 |
| OCEL1     | 37219 | 2484,9382 | 0,7205 | 0,0378 | 8,00E-04 |
| GUSBL1    | 11578 | 2484,7596 | 0,7042 | 0,0379 | 8,00E-04 |
| DGKD      | 7245  | 2485,4662 | 0,7132 | 0,0379 | 8,00E-04 |
| LILRB3    | 27234 | 2494,7375 | 0,7177 | 0,0383 | 8,00E-04 |
| ZNF177    | 48088 | 2497,7725 | 0,6962 | 0,0384 | 8,00E-04 |
| ANAPC4    | 1008  | 2502,1186 | 0,6998 | 0,0385 | 8,00E-04 |
| ZNF285A   | 48206 | 2501,7516 | 0,7567 | 0,0385 | 8,00E-04 |
| C10ORF58  | 2699  | 2500,9174 | 0,7074 | 0,0386 | 8,00E-04 |
| USP47     | 47047 | 2501,5289 | 0,719  | 0,0386 | 8,00E-04 |
| WDR26     | 47388 | 2507,0447 | 0,7158 | 0,0387 | 8,00E-04 |
| RN7SL1    | 41266 | 2504,882  | 0,7256 | 0,0387 | 8,00E-04 |
| HS.130036 | 12845 | 2510,6676 | 0,7056 | 0,0389 | 8,00E-04 |
| ZCCHC7    | 47868 | 2517,6744 | 0,7128 | 0,0393 | 9,00E-04 |
| ITM2B     | 25810 | 2520,5011 | 0,7048 | 0,0395 | 9,00E-04 |
| PHF21A    | 38782 | 2523,8732 | 0,7236 | 0,0396 | 9,00E-04 |
| TCEA2     | 44872 | 2531,5934 | 0,6971 | 0,04   | 9,00E-04 |
| KLHDC9    | 26613 | 2529,4173 | 0,7315 | 0,04   | 9,00E-04 |
| C12ORF47  | 2846  | 2533,7393 | 0,7194 | 0,0401 | 9,00E-04 |
| BMF       | 2391  | 2531,3954 | 0,7209 | 0,0401 | 9,00E-04 |
| NADK      | 36136 | 2533,0912 | 0,7263 | 0,0401 | 9,00E-04 |
| DMD       | 7506  | 2537,8609 | 0,694  | 0,0403 | 9,00E-04 |
| PARP11    | 38124 | 2538,4253 | 0,7183 | 0,0403 | 9,00E-04 |
| LCOR      | 27077 | 2539,104  | 0,7217 | 0,0403 | 9,00E-04 |
| HS.483906 | 16242 | 2539,2026 | 0,7307 | 0,0403 | 9,00E-04 |
| ARSD      | 1629  | 2536,7406 | 0,8152 | 0,0403 | 9,00E-04 |
| PTP4A2    | 40237 | 2544,2528 | 0,727  | 0,0405 | 9,00E-04 |
| FRAT1     | 10197 | 2547,0465 | 0,7083 | 0,0406 | 9,00E-04 |
| TLL3      | 46432 | 2548,7419 | 0,7093 | 0,0406 | 9,00E-04 |
| CRIPAK    | 6282  | 2545,9869 | 0,7146 | 0,0406 | 9,00E-04 |
| SDHA      | 42150 | 2546,9507 | 0,7228 | 0,0406 | 9,00E-04 |
| PDE7A     | 38480 | 2549,8178 | 0,7229 | 0,0407 | 9,00E-04 |
| LOC728565 | 33684 | 2551,6411 | 0,7186 | 0,0408 | 9,00E-04 |
| PSCD1     | 40021 | 2557,6876 | 0,7346 | 0,0411 | 9,00E-04 |
| SFRS14    | 42490 | 2560,2818 | 0,718  | 0,0412 | 9,00E-04 |
| HS.211743 | 14187 | 2558,7752 | 0,7236 | 0,0412 | 9,00E-04 |
| RGS2      | 41136 | 2562,7259 | 0,7144 | 0,0413 | 9,00E-04 |
| LOC644250 | 30073 | 2563,7679 | 0,7108 | 0,0414 | 9,00E-04 |
| LOC652458 | 32709 | 2566,5236 | 0,7448 | 0,0415 | 9,00E-04 |
| GPSM3     | 11295 | 2567,7241 | 0,7107 | 0,0416 | 9,00E-04 |
| SYVN1     | 44597 | 2568,1466 | 0,7275 | 0,0416 | 9,00E-04 |
| ULK1      | 46869 | 2569,3155 | 0,718  | 0,0417 | 9,00E-04 |
| CASP1     | 4451  | 2570,9313 | 0,7182 | 0,0417 | 9,00E-04 |

|           |       |           |        |        |          |
|-----------|-------|-----------|--------|--------|----------|
| ANKRD28   | 1099  | 2573,0243 | 0,7171 | 0,0418 | 9,00E-04 |
| SEPN1     | 42306 | 2577,4896 | 0,7155 | 0,042  | 9,00E-04 |
| RPL7L1    | 41588 | 2578,5581 | 0,7185 | 0,042  | 9,00E-04 |
| RNF38     | 41393 | 2581,7419 | 0,7155 | 0,0423 | 0,001    |
| S100PBP   | 41887 | 2585,3523 | 0,7229 | 0,0425 | 0,001    |
| SLC35E1   | 43089 | 2588,6083 | 0,7125 | 0,0427 | 0,001    |
| LOC92497  | 34065 | 2592,8123 | 0,7306 | 0,043  | 0,001    |
| CDC16     | 5058  | 2594,3659 | 0,7324 | 0,043  | 0,001    |
| NT5C3     | 37022 | 2597,7796 | 0,7074 | 0,0431 | 0,001    |
| TMEM63A   | 45611 | 2596,1337 | 0,7106 | 0,0431 | 0,001    |
| C17ORF87  | 3146  | 2596,5889 | 0,7111 | 0,0431 | 0,001    |
| MGEA5     | 35279 | 2597,8642 | 0,722  | 0,0431 | 0,001    |
| ZNF767    | 48661 | 2598,9806 | 0,7233 | 0,0431 | 0,001    |
| BMF       | 2394  | 2600,7486 | 0,7396 | 0,0432 | 0,001    |
| NSUN7     | 37014 | 2604,2168 | 0,7197 | 0,0434 | 0,001    |
| MLL5      | 35393 | 2604,9972 | 0,7253 | 0,0434 | 0,001    |
| TMEM42    | 45585 | 2607,5621 | 0,722  | 0,0435 | 0,001    |
| PLEKHA9   | 39135 | 2607,1775 | 0,7417 | 0,0435 | 0,001    |
| SPIN4     | 43914 | 2611,4157 | 0,7143 | 0,0437 | 0,001    |
| ZNF828    | 48704 | 2615,4904 | 0,7175 | 0,0439 | 0,001    |
| ZNF816A   | 48698 | 2621,003  | 0,7134 | 0,0442 | 0,001    |
| LOC728153 | 33622 | 2622,713  | 0,7198 | 0,0443 | 0,001    |
| PPP1CB    | 39571 | 2626,976  | 0,7058 | 0,0444 | 0,001    |
| AFTPH     | 615   | 2624,3065 | 0,7239 | 0,0444 | 0,001    |
| TCIRG1    | 44938 | 2626,9696 | 0,7059 | 0,0445 | 0,001    |
| MGC3207   | 35189 | 2631,6437 | 0,7241 | 0,0445 | 0,001    |
| SCARB2    | 42015 | 2628,3956 | 0,7305 | 0,0445 | 0,001    |
| LOC648622 | 31609 | 2629,9749 | 0,7306 | 0,0445 | 0,001    |
| ZNF514    | 48409 | 2630,9666 | 0,7369 | 0,0445 | 0,001    |
| AKAP7     | 764   | 2632,4444 | 0,7865 | 0,0445 | 0,001    |
| STAG2     | 44214 | 2637,2691 | 0,7119 | 0,0446 | 0,001    |
| BTN3A2    | 2600  | 2635,7804 | 0,7176 | 0,0446 | 0,001    |
| GSTK1     | 11467 | 2637,0373 | 0,7184 | 0,0446 | 0,001    |
| STK38     | 44318 | 2636,9639 | 0,7322 | 0,0446 | 0,001    |
| TMEM143   | 45452 | 2639,5242 | 0,7169 | 0,0447 | 0,001    |
| GTF2IRD2B | 11526 | 2635,6758 | 0,7255 | 0,0447 | 0,001    |
| CCDC84    | 4730  | 2634,5042 | 0,7288 | 0,0447 | 0,001    |
| KIAA2026  | 26457 | 2641,3001 | 0,7175 | 0,0448 | 0,001    |
| ARHGAP4   | 1444  | 2642,2208 | 0,7203 | 0,0448 | 0,001    |
| KIAA0528  | 26229 | 2644,0309 | 0,7397 | 0,0449 | 0,001    |
| HPS3      | 12241 | 2646,0109 | 0,7317 | 0,045  | 0,001    |
| HS.20255  | 14067 | 2650,3918 | 0,7366 | 0,0452 | 0,0011   |
| CAPN3     | 4396  | 2653,6983 | 0,7182 | 0,0454 | 0,0011   |
| HS.516646 | 16501 | 2654,6404 | 0,7286 | 0,0454 | 0,0011   |
| HS.163752 | 13669 | 2656,4326 | 0,7169 | 0,0455 | 0,0011   |
| FRAT2     | 10199 | 2657,242  | 0,7173 | 0,0455 | 0,0011   |
| MGST1     | 35290 | 2659,5284 | 0,7273 | 0,0456 | 0,0011   |

|           |       |           |        |        |        |
|-----------|-------|-----------|--------|--------|--------|
| PPP2R5B   | 39651 | 2660,9808 | 0,7446 | 0,0456 | 0,0011 |
| ASF1A     | 1706  | 2665,2558 | 0,7055 | 0,0457 | 0,0011 |
| ZDHHC8    | 47904 | 2664,5556 | 0,7106 | 0,0457 | 0,0011 |
| C17ORF48  | 3102  | 2668,1961 | 0,7184 | 0,0457 | 0,0011 |
| TULP4     | 46546 | 2663,88   | 0,7201 | 0,0457 | 0,0011 |
| DMTF1     | 7527  | 2666,1475 | 0,7258 | 0,0457 | 0,0011 |
| ATP2B1    | 1867  | 2662,4885 | 0,7273 | 0,0457 | 0,0011 |
| CALCOCO1  | 4316  | 2664,4192 | 0,7372 | 0,0457 | 0,0011 |
| CYORF15A  | 6764  | 2666,5175 | 0,9041 | 0,0457 | 0,0011 |
| ACSS1     | 335   | 2669,5361 | 0,7131 | 0,0458 | 0,0011 |
| PLCG2     | 39093 | 2670,3158 | 0,7228 | 0,0458 | 0,0011 |
| SERPIN2   | 42391 | 2668,0455 | 0,8351 | 0,0458 | 0,0011 |
| LOC654103 | 33471 | 2676,207  | 0,7154 | 0,046  | 0,0011 |
| C14ORF135 | 2922  | 2674,7474 | 0,726  | 0,046  | 0,0011 |
| LOC441155 | 28737 | 2678,8038 | 0,7206 | 0,0461 | 0,0011 |
| IL1RN     | 25446 | 2678,8092 | 0,7463 | 0,0461 | 0,0011 |
| LIG1      | 27210 | 2683,1385 | 0,7049 | 0,0462 | 0,0011 |
| CRYGS     | 6347  | 2681,5819 | 0,7242 | 0,0462 | 0,0011 |
| KRCC1     | 26725 | 2685,7569 | 0,7276 | 0,0464 | 0,0011 |
| CSF2RA    | 6381  | 2691,8658 | 0,7255 | 0,0465 | 0,0011 |
| ARID4B    | 1499  | 2689,8412 | 0,7336 | 0,0465 | 0,0011 |
| WEE1      | 47492 | 2689,4595 | 0,7323 | 0,0466 | 0,0011 |
| ZNF175    | 48087 | 2690,7295 | 0,7347 | 0,0466 | 0,0011 |
| AFAP1L2   | 594   | 2695,1261 | 0,7256 | 0,0467 | 0,0011 |
| LOC642989 | 29498 | 2700,563  | 0,7097 | 0,047  | 0,0011 |
| DBNDD1    | 6928  | 2700,7853 | 0,7252 | 0,047  | 0,0011 |
| RHBDF2    | 41165 | 2699,9025 | 0,7306 | 0,047  | 0,0011 |
| CAPN12    | 4389  | 2708,4946 | 0,6971 | 0,0475 | 0,0011 |
| LOC400304 | 28355 | 2708,0589 | 0,7332 | 0,0475 | 0,0011 |
| CRLF3     | 6300  | 2709,8699 | 0,7267 | 0,0476 | 0,0011 |
| TAGAP     | 44674 | 2715,0033 | 0,7211 | 0,0478 | 0,0011 |
| TSPAN3    | 46320 | 2713,8343 | 0,7231 | 0,0478 | 0,0011 |
| ZCWPW1    | 47872 | 2713,0911 | 0,7251 | 0,0478 | 0,0011 |
| HS.15956  | 13597 | 2721,0593 | 0,7315 | 0,0482 | 0,0012 |
| AP3B1     | 1237  | 2723,2886 | 0,7165 | 0,0484 | 0,0012 |
| HERC1     | 11797 | 2728,5404 | 0,7214 | 0,0486 | 0,0012 |
| IFNAR1    | 25243 | 2725,9012 | 0,7387 | 0,0486 | 0,0012 |
| HS.569104 | 22470 | 2726,7138 | 0,7808 | 0,0486 | 0,0012 |
| ZNF483    | 48380 | 2731,7127 | 0,7285 | 0,0488 | 0,0012 |
| CD79A     | 5008  | 2733,3812 | 0,7381 | 0,0488 | 0,0012 |
| BRWD2     | 2543  | 2732,088  | 0,7987 | 0,0488 | 0,0012 |
| RPS27A    | 41652 | 2735,186  | 0,7135 | 0,0489 | 0,0012 |
| DEPDC5    | 7197  | 2734,0003 | 0,7351 | 0,0489 | 0,0012 |
| KLHL3     | 26637 | 2740,2874 | 0,722  | 0,0491 | 0,0012 |
| N4BP2     | 36119 | 2745,7217 | 0,7251 | 0,0494 | 0,0012 |
| ICK       | 25165 | 2748,0599 | 0,7169 | 0,0495 | 0,0012 |
| FLJ38717  | 9822  | 2748,3408 | 0,7245 | 0,0495 | 0,0012 |

|      |       |           |        |        |        |
|------|-------|-----------|--------|--------|--------|
| OFD1 | 37247 | 2750,7644 | 0,7366 | 0,0497 | 0,0012 |
| IL8  | 25510 | 2754,9447 | 0,7846 | 0,05   | 0,0012 |
