# Supplementary material for: CLL Cells Respond to B-Cell Receptor Stimulation with a MicroRNA/mRNA Signature Associated with MYC Activation and Cell Cycle Progression
Source: PubMed Central journal article supplement (PMC3613353; doi:10.1371/journal.pone.0060275), 2013-04-01
Supplement: pone.0060275.s011.pdf [file pone.0060275.s011.pdf]

| Gene Set                                         | NES        |
|--------------------------------------------------|------------|
| KEGG_PROTEASOME                                  | -2,7981236 |
| KEGG_GLYCOLYSIS_GLUONEOGENESIS                   | -2,5058157 |
| KEGG_AMINOACYL_TRNA_BIOSYNTHESIS                 | -2,4161668 |
| PROTEIN_FOLDING                                  | -2,3515246 |
| NITROGEN_COMPOUND_METABOLIC_PROCESS              | -2,2858992 |
| AMINE_METABOLIC_PROCESS                          | -2,2382627 |
| AMINO_ACID_METABOLIC_PROCESS                     | -2,2372925 |
| KEGG_PARKINSONS_DISEASE                          | -2,2234716 |
| KEGG_PENTOSE_PHOSPHATE_PATHWAY                   | -2,1792994 |
| AMINO_ACID_AND_DERIVATIVE_METABOLIC_PROCESS      | -2,1588688 |
| KEGG_CITRATE_CYCLE_TCA_CYCLE                     | -2,1531835 |
| KEGG_CYSTEINE_AND_METHIONINE_METABOLISM          | -2,1479754 |
| KEGG_OXIDATIVE_PHOSPHORYLATION                   | -2,1261601 |
| V\$MYC_MAX_01                                    | -2,107117  |
| COFACTOR_METABOLIC_PROCESS                       | -2,102321  |
| MITOCHONDRION_ORGANIZATION_AND_BIOGENESIS        | -2,1017635 |
| TRNA_METABOLIC_PROCESS                           | -2,100583  |
| KEGG_PROTEIN_EXPORT                              | -2,0880094 |
| KEGG_ALZHEIMERS_DISEASE                          | -2,0857005 |
| V\$MYC_Q2                                        | -2,0798883 |
| KEGG_AMINO_SUGAR_AND_NUCLEOTIDE_SUGAR_METABOLISM | -2,0778565 |
| CARBOXYLIC_ACID_METABOLIC_PROCESS                | -2,0747218 |
| ORGANIC_ACID_METABOLIC_PROCESS                   | -2,0744777 |
| CELLULAR_BIOSYNTHETIC_PROCESS                    | -2,0706565 |
| KEGG_FRUCTOSE_AND_MANNOSE_METABOLISM             | -2,0652034 |
| KEGG_PATHOGENIC_ESCHERICHIA_COLI_INFECTION       | -2,0367074 |
| HETEROCYCLE_METABOLIC_PROCESS                    | -2,0319421 |
| KEGG_RNA_POLYMERASE                              | -2,0271745 |
| MITOCHONDRIAL_TRANSPORT                          | -2,020482  |
| BIOSYNTHETIC_PROCESS                             | -2,0054471 |
| V\$HIF1_Q3                                       | -2,0014095 |
| KEGG_ARGININE_AND_PROLINE_METABOLISM             | -1,9881915 |
| KEGG_TERPENOID_BACKBONE_BIOSYNTHESIS             | -1,9849468 |
| V\$GABP_B                                        | -1,9784379 |
| ALCOHOL_METABOLIC_PROCESS                        | -1,9687159 |
| KEGG_SELENOAMINO_ACID_METABOLISM                 | -1,9603868 |
| KEGG_GLYOXYLATE_AND_DICARBOXYLATE_METABOLISM     | -1,9559577 |
| COENZYME_METABOLIC_PROCESS                       | -1,9552972 |
| V\$USF_C                                         | -1,9532865 |
| CELLULAR_CARBOHYDRATE_METABOLIC_PROCESS          | -1,9428166 |
| KEGG_CARDIAC_MUSCLE_CONTRACTION                  | -1,937909  |
| KEGG_ALANINE_ASPARTATE_AND_GLUTAMATE_METABOLISM  | -1,9321718 |
| KEGG_HUNTINGTONS_DISEASE                         | -1,9298851 |

|                                                   |            |
|---------------------------------------------------|------------|
| KEGG_SPLICEOSOME                                  | -1,9281821 |
| KEGG_VIBRIO_CHOLERAЕ_INFECTION                    | -1,9272383 |
| RNA_PROCESSING                                    | -1,9135625 |
| POSITIVE_REGULATION_OF_CELL_CYCLE                 | -1,9089651 |
| AROMATIC_COMPOUND_METABOLIC_PROCESS               | -1,8972907 |
| TTCNRGNNNTTC_V\$HSF_Q6                            | -1,891327  |
| RIBONUCLEOPROTEIN_COMPLEX_BIOGENESIS_AND_ASSEMBLY | -1,890157  |
| TGASTMAGC_V\$NFE2_01                              | -1,8729239 |
| CGGAARNGGCNG_UNKNOWN                              | -1,870343  |
| AMINO_ACID_TRANSPORT                              | -1,8672116 |
| KEGG_N_GLYCAN_BIOSYNTHESIS                        | -1,8670521 |
| SECONDARY_METABOLIC_PROCESS                       | -1,8659898 |
| RESPONSE_TO_OXIDATIVE_STRESS                      | -1,8634323 |
| V\$USF2_Q6                                        | -1,8536484 |
| CELLULAR_CARBOHYDRATE_CATABOLIC_PROCESS           | -1,8493507 |
| KEGG_GALACTOSE_METABOLISM                         | -1,8465056 |
| PIGMENT_METABOLIC_PROCESS                         | -1,8455678 |
| KEGG_RIBOSOME                                     | -1,8419878 |
| KEGG_PYRUVATE_METABOLISM                          | -1,834186  |
| CARBOHYDRATE_BIOSYNTHETIC_PROCESS                 | -1,8299872 |
| V\$ATF_01                                         | -1,8240834 |
| V\$MYCMAX_B                                       | -1,8200685 |
| V\$ELK1_02                                        | -1,817645  |
| NITROGEN_COMPOUND_BIOSYNTHETIC_PROCESS            | -1,8164427 |
| V\$SRF_01                                         | -1,8150768 |
| V\$NMYC_01                                        | -1,8149133 |
| CCAWWNAAGG_V\$SRF_Q4                              | -1,8016021 |
| KEGG_PYRIMIDINE_METABOLISM                        | -1,793939  |
| KEGG_RNA_DEGRADATION                              | -1,7912732 |
| TRANSLATION                                       | -1,7912457 |
| TGANNYRGCA_V\$TCF11MAFG_01                        | -1,7799392 |
| KEGG_VALINE_LEUCINE_AND_ISOLEUCINE_DEGRADATION    | -1,7790892 |
| STEROID_BIOSYNTHETIC_PROCESS                      | -1,7782346 |
| CARBOHYDRATE_CATABOLIC_PROCESS                    | -1,77568   |
| V\$NRF2_01                                        | -1,7729795 |
| KEGG_ONE_CARBON_POOL_BY_FOLATE                    | -1,7683319 |
| KEGG_STEROID_BIOSYNTHESIS                         | -1,7608944 |
| V\$NRF2_Q4                                        | -1,7556549 |
| KEGG_PHENYLALANINE_METABOLISM                     | -1,752845  |
| PIGMENT_BIOSYNTHETIC_PROCESS                      | -1,748059  |
| V\$NFE2_01                                        | -1,7434299 |
| REGULATION_OF_CELL_CYCLE                          | -1,7413938 |
| CELL_CYCLE_GO_0007049                             | -1,7403742 |
| V\$ARNT_01                                        | -1,7402039 |

|                                                       |            |
|-------------------------------------------------------|------------|
| CARBOHYDRATE_METABOLIC_PROCESS                        | -1,7397976 |
| V\$SRF_Q6                                             | -1,7389747 |
| NUCLEOBASENUCLEOSIDE_AND_NUCLEOTIDE_METABOLIC_PROCESS | -1,7330017 |
| CARBOXYLIC_ACID_TRANSPORT                             | -1,7312112 |
| AMINO_SUGAR_METABOLIC_PROCESS                         | -1,7307831 |
| MITOTIC_CELL_CYCLE                                    | -1,7293234 |
| ORGANIC_ACID_TRANSPORT                                | -1,7221488 |
| MRNA_METABOLIC_PROCESS                                | -1,7125987 |
| MACROMOLECULE_BIOSYNTHETIC_PROCESS                    | -1,7048229 |
| V\$ATF6_01                                            | -1,704472  |
| AMINE_BIOSYNTHETIC_PROCESS                            | -1,7035104 |
| KEGG_PROXIMAL_TUBULE_BICARBONATE_RECLAMATION          | -1,7001636 |
| V\$CREB_Q3                                            | -1,6983218 |
| V\$AP1_01                                             | -1,6970884 |
| KEGG_LYSOSOME                                         | -1,6964374 |
| V\$XBP1_01                                            | -1,6843419 |
| V\$HIF1_Q5                                            | -1,675343  |
| KEGG_PURINE_METABOLISM                                | -1,6592855 |
| ACTAYRNNNCCCR_UNKNOWN                                 | -1,6583364 |
| V\$MAX_01                                             | -1,6516819 |
| V\$PPARG_01                                           | -1,6481    |
| V\$USF_Q6                                             | -1,641402  |
| KEGG_PORPHYRIN_AND_CHLOROPHYLL_METABOLISM             | -1,6348813 |
| KEGG_TYROSINE_METABOLISM                              | -1,6328541 |
| CGTSACG_V\$PAX3_B                                     | -1,623522  |
| V\$CREBP1_Q2                                          | -1,6211461 |
| GKCGCNNNNNNNTGAYG_UNKNOWN                             | -1,6192927 |
| ACTWSNACTNY_UNKNOWN                                   | -1,6143744 |
| YYCATTCAWW_UNKNOWN                                    | -1,6104406 |
| KTGGYRSGAA_UNKNOWN                                    | -1,6071126 |
| RRCCGTTA_UNKNOWN                                      | -1,6051728 |
| TCCCRNNRTGC_UNKNOWN                                   | -1,6040845 |
| V\$E2F_Q4_01                                          | -1,6039628 |
| V\$SRF_C                                              | -1,6000705 |
| V\$CREB_Q4_01                                         | -1,5942569 |
| KEGG_GLYCINE_SERINE_AND_THREONINE_METABOLISM          | -1,5935856 |
| V\$E2F1_Q6_01                                         | -1,5897303 |
| V\$TCF11MAFG_01                                       | -1,5892336 |
| V\$USF_01                                             | -1,5888231 |
| KEGG_DNA_REPLICATION                                  | -1,5873499 |
| TCANNTGAY_V\$SREBP1_01                                | -1,5869843 |
| V\$MYCMAX_03                                          | -1,5839589 |
| SGCGSSAAA_V\$E2F1DP2_01                               | -1,5731711 |
| GGAANCGGAANY_UNKNOWN                                  | -1,5698109 |

|                       |            |
|-----------------------|------------|
| V\$HNF4_01            | -1,5661803 |
| TTCYRGAA_UNKNOWN      | -1,5580405 |
| V\$E2F4DP2_01         | -1,5575514 |
| V\$ATF_B              | -1,5550233 |
| V\$E2F1DP1_01         | -1,5546685 |
| V\$COUP_DR1_Q6        | -1,5525135 |
| V\$CREB_02            | -1,5479219 |
| V\$PPAR_DR1_Q2        | -1,5470638 |
| V\$E2F1DP2_01         | -1,5450486 |
| V\$E2F_02             | -1,5439019 |
| YGCGYRCGC_UNKNOWN     | -1,5436958 |
| V\$ERR1_Q2            | -1,5418429 |
| V\$E2F4DP1_01         | -1,540896  |
| V\$CREB_Q2_01         | -1,5376639 |
| V\$STAT1_02           | -1,5354567 |
| V\$NRF1_Q6            | -1,5287105 |
| V\$ALPHACP1_01        | -1,5216415 |
| V\$E2F_01             | -1,5203168 |
| V\$CREB_01            | -1,5039147 |
| SNACANNYSYAGA_UNKNOWN | -1,4983753 |
| V\$ARNT_02            | -1,4963322 |
| V\$E2F1_Q6            | -1,4948996 |
| V\$AP1_Q4_01          | -1,4919646 |
| TGACCTTG_V\$SF1_Q6    | -1,4873445 |
| V\$CREBP1CJUN_01      | -1,4849901 |
| TGACGTCA_V\$ATF3_Q6   | -1,4822891 |
| V\$CETS1P54_01        | -1,4821042 |
| V\$SRF_Q4             | -1,4806056 |
| V\$SRF_Q5_01          | -1,4759026 |
| V\$HEB_Q6             | -1,4686565 |
| V\$USF_Q6_01          | -1,4660532 |
| V\$BACH2_01           | -1,4645076 |
| V\$HTF_01             | -1,4476479 |
| V\$STAT5A_01          | -1,4466268 |
| V\$E2F1_Q3            | -1,4446814 |
| V\$USF_02             | -1,4390981 |
| V\$AP1_Q6             | -1,4389751 |
| V\$ZF5_01             | -1,4388026 |
| V\$NFY_C              | -1,4355828 |
| CCAATNNSNNGCG_UNKNOWN | -1,4352742 |
| V\$E2F_Q6_01          | -1,4335244 |
| V\$E4F1_Q6            | -1,4327898 |
| TGCGCANK_UNKNOWN      | -1,4315721 |
| V\$E2F1_Q4_01         | -1,4304066 |

|                                            |            |
|--------------------------------------------|------------|
| V\$MYCMAX_02                               | -1,4160752 |
| V\$E2F1DP1RB_01                            | -1,4108465 |
| V\$E2F_03                                  | -1,4065132 |
| V\$AP1_Q6_01                               | -1,4050207 |
| V\$DR1_Q3                                  | -1,4045991 |
| V\$E2F_Q3_01                               | -1,4022812 |
| V\$AP1_C                                   | -1,4021095 |
| CTGRYYYYNATT_UNKNOWN                       | -1,3944839 |
| V\$NFY_01                                  | -1,3940098 |
| V\$BACH1_01                                | -1,3905578 |
| V\$PAX3_01                                 | -1,3880159 |
| V\$CREL_01                                 | 1,5825131  |
| V\$IK3_01                                  | 1,5908895  |
| V\$PEA3_Q6                                 | 1,5917994  |
| V\$HP1SITEFACTOR_Q6                        | 1,5944347  |
| V\$NFKAPPAB_01                             | 1,6007775  |
| V\$ETS1_B                                  | 1,6039326  |
| V\$IRF7_01                                 | 1,6160452  |
| V\$GR_Q6_01                                | 1,6333253  |
| V\$IRF1_Q6                                 | 1,6953967  |
| V\$PAX8_01                                 | 1,6971809  |
| V\$ELF1_Q6                                 | 1,7918807  |
| STTTCRNTTT_V\$IRF_Q6                       | 1,8374724  |
| POSITIVE_REGULATION_OF_MAP_KINASE_ACTIVITY | 1,8825512  |
| V\$ICSBP_Q6                                | 1,9820628  |
| CYTOKINE_PRODUCTION                        | 2,0034878  |
| RESPONSE_TO_BACTERIUM                      | 2,0225382  |
| RESPONSE_TO_OTHER_ORGANISM                 | 2,0245862  |
| V\$ISRE_01                                 | 2,0419588  |
| V\$IRF_Q6                                  | 2,1116283  |

| <b>FDR q-value</b> | <b>Category</b> |
|--------------------|-----------------|
| 0                  | stimulated      |
| 0                  | stimulated      |
| 0                  | stimulated      |
| 0                  | stimulated      |
| 0                  | stimulated      |
| 0                  | stimulated      |
| 0                  | stimulated      |
| 0                  | stimulated      |
| 0                  | stimulated      |
| 0                  | stimulated      |
| 7,10E-04           | stimulated      |
| 0                  | stimulated      |
| 0                  | stimulated      |
| 4,90E-04           | stimulated      |
| 0,002037342        | stimulated      |
| 0,001548958        | stimulated      |
| 0,001327678        | stimulated      |
| 0,001161719        | stimulated      |
| 5,97E-04           | stimulated      |
| 5,37E-04           | stimulated      |
| 0,001018671        | stimulated      |
| 4,88E-04           | stimulated      |
| 0,001805034        | stimulated      |
| 0,00162453         | stimulated      |
| 0,001684934        | stimulated      |
| 4,47E-04           | stimulated      |
| 4,13E-04           | stimulated      |
| 0,002426604        | stimulated      |
| 3,84E-04           | stimulated      |
| 0,002785516        | stimulated      |
| 0,003262081        | stimulated      |
| 0,001721177        | stimulated      |
| 7,96E-04           | stimulated      |
| 7,46E-04           | stimulated      |
| 0,001826473        | stimulated      |
| 0,005047221        | stimulated      |
| 0,001251231        | stimulated      |
| 0,001181718        | stimulated      |
| 0,005889482        | stimulated      |
| 0,001461179        | stimulated      |
| 0,006783405        | stimulated      |
| 0,001478017        | stimulated      |
| 0,001464869        | stimulated      |
| 0,001395113        | stimulated      |

0,001331699 stimulated  
0,001273799 stimulated  
0,009773843 stimulated  
0,009927046 stimulated  
0,011101742 stimulated  
0,002965855 stimulated  
0,011402897 stimulated  
0,002960752 stimulated  
0,003099069 stimulated  
0,014165985 stimulated  
0,003084766 stimulated  
0,013601732 stimulated  
0,01332595 stimulated  
0,003441172 stimulated  
0,015626155 stimulated  
0,003863811 stimulated  
0,015339699 stimulated  
0,003974493 stimulated  
0,004520753 stimulated  
0,018391995 stimulated  
0,00487207 stimulated  
0,004621004 stimulated  
0,004323758 stimulated  
0,020315342 stimulated  
0,003991162 stimulated  
0,003706079 stimulated  
0,004091826 stimulated  
0,007240905 stimulated  
0,007082444 stimulated  
0,025500683 stimulated  
0,004351031 stimulated  
0,007549192 stimulated  
0,028080828 stimulated  
0,027955119 stimulated  
0,00434314 stimulated  
0,00836569 stimulated  
0,008875286 stimulated  
0,005648669 stimulated  
0,009345831 stimulated  
0,03684092 stimulated  
0,006165095 stimulated  
0,038210336 stimulated  
0,037395995 stimulated  
0,006011244 stimulated

0,036594655 stimulated  
0,005822219 stimulated  
0,039075874 stimulated  
0,038808268 stimulated  
0,03787579 stimulated  
0,03755456 stimulated  
0,039760053 stimulated  
0,042526867 stimulated  
0,044826943 stimulated  
0,007648897 stimulated  
0,04413521 stimulated  
0,015374668 stimulated  
0,007858409 stimulated  
0,007616193 stimulated  
0,015587701 stimulated  
0,008476602 stimulated  
0,009015859 stimulated  
0,021637624 stimulated  
0,010701226 stimulated  
0,011138468 stimulated  
0,011152527 stimulated  
0,011863454 stimulated  
0,027140869 stimulated  
0,02677902 stimulated  
0,013613904 stimulated  
0,01351077 stimulated  
0,013348889 stimulated  
0,013623857 stimulated  
0,014051513 stimulated  
0,014260245 stimulated  
0,014205995 stimulated  
0,013860437 stimulated  
0,013556045 stimulated  
0,013894982 stimulated  
0,014440123 stimulated  
0,036791228 stimulated  
0,014824446 stimulated  
0,014524722 stimulated  
0,014194614 stimulated  
0,037804887 stimulated  
0,014268239 stimulated  
0,014451876 stimulated  
0,016017951 stimulated  
0,016391682 stimulated



0,016627487 stimulated  
0,017593732 stimulated  
0,017490696 stimulated  
0,017673567 stimulated  
0,017358499 stimulated  
0,017416928 stimulated  
0,017978797 stimulated  
0,017802743 stimulated  
0,01768977 stimulated  
0,01759534 stimulated  
0,017366603 stimulated  
0,01733372 stimulated  
0,01716968 stimulated  
0,017477369 stimulated  
0,01762342 stimulated  
0,018332748 stimulated  
0,019517267 stimulated  
0,019543128 stimulated  
0,023087228 stimulated  
0,02427849 stimulated  
0,024529766 stimulated  
0,02451279 stimulated  
0,024900118 stimulated  
0,026244564 stimulated  
0,026462894 stimulated  
0,026788438 stimulated  
0,026474236 stimulated  
0,02653413 stimulated  
0,027753783 stimulated  
0,029096507 stimulated  
0,029543351 stimulated  
0,029649477 stimulated  
0,034573708 stimulated  
0,034503996 stimulated  
0,034882028 stimulated  
0,036497507 stimulated  
0,03614408 stimulated  
0,035795085 stimulated  
0,036578063 stimulated  
0,036348674 stimulated  
0,036490463 stimulated  
0,0363473 stimulated  
0,03641908 stimulated  
0,03655361 stimulated

0,0419176 stimulated  
0,043651555 stimulated  
0,0451289 stimulated  
0,045287594 stimulated  
0,04501096 stimulated  
0,0455493 stimulated  
0,045163155 stimulated  
0,0480993 stimulated  
0,047865525 stimulated  
0,04902835 stimulated  
0,049768426 stimulated  
0,047672007 unstimulated  
0,046848867 unstimulated  
0,04968197 unstimulated  
0,05220317 unstimulated  
0,052993134 unstimulated  
0,05643395 unstimulated  
0,05467267 unstimulated  
0,052455034 unstimulated  
0,029519286 unstimulated  
0,033934437 unstimulated  
0,01182026 unstimulated  
0,008466081 unstimulated  
0,04513918 unstimulated  
0,001328023 unstimulated  
0,009651061 unstimulated  
0,010665851 unstimulated  
0,02044814 unstimulated  
9,98E-04 unstimulated  
0 unstimulated
