# Supplementary material for: CLL Cells Respond to B-Cell Receptor Stimulation with a MicroRNA/mRNA Signature Associated with MYC Activation and Cell Cycle Progression
Source: PubMed Central journal article supplement (PMC3613353; doi:10.1371/journal.pone.0060275), 2013-04-01
Supplement: pone.0060275.s012.pdf [file pone.0060275.s012.pdf]

| <b>miRNA</b><br>(Alfabetical order) | <b>Expression level in screening</b> | <b>miRNA</b><br>(Sorted in decreasing abundance) | <b>Expression level in screening</b> |
|-------------------------------------|--------------------------------------|--------------------------------------------------|--------------------------------------|
| hsa-let-7a                          | 15,84                                | hsa-mir-150                                      | 8181,10                              |
| hsa-let-7b                          | 21,04                                | U6                                               | 6885,86                              |
| hsa-let-7c                          | 0,27                                 | RNU48                                            | 4417,19                              |
| hsa-let-7d                          | 11,96                                | RNU44                                            | 647,65                               |
| hsa-let-7e                          | 86,90                                | hsa-mir-768-3p                                   | 355,14                               |
| hsa-let-7f                          | 2,29                                 | hsa-mir-223                                      | 257,22                               |
| hsa-let-7g                          | 36,48                                | hsa-mir-142-3p                                   | 206,08                               |
| hsa-mir-101                         | 0,73                                 | hsa-mir-19b                                      | 130,89                               |
| hsa-mir-103                         | 4,95                                 | hsa-mir-191                                      | 95,01                                |
| hsa-mir-106a                        | 40,72                                | hsa-let-7e                                       | 86,90                                |
| hsa-mir-106b                        | 10,90                                | RNU24                                            | 80,64                                |
| hsa-mir-125a-5p                     | 0,02                                 | hsa-mir-26a                                      | 75,12                                |
| hsa-mir-126                         | 0,05                                 | hsa-mir-92a                                      | 75,08                                |
| hsa-mir-126x                        | 0,06                                 | hsa-mir-20a                                      | 71,89                                |
| hsa-mir-127                         | 0,01                                 | hsa-mir-342-3p                                   | 71,80                                |
| hsa-mir-128a                        | 0,29                                 | hsa-mir-29a                                      | 69,64                                |
| hsa-mir-130b                        | 0,24                                 | hsa-mir-21                                       | 68,92                                |
| hsa-mir-132-3p                      | 8,99                                 | hsa-mir-30c                                      | 59,56                                |
| hsa-mir-132-5p                      | 0,02                                 | hsa-mir-30b                                      | 57,54                                |
| hsa-mir-135a                        | 0,02                                 | hsa-mir-135ax                                    | 56,96                                |
| hsa-mir-135ax                       | 56,96                                | hsa-mir-17                                       | 45,05                                |
| hsa-mir-138-1x                      | 0,84                                 | hsa-mir-24                                       | 44,73                                |
| hsa-mir-140-3p                      | 0,25                                 | hsa-mir-923                                      | 43,28                                |
| hsa-mir-141                         | 0,05                                 | hsa-mir-222                                      | 42,35                                |
| hsa-mir-142-3p                      | 206,08                               | hsa-mir-16                                       | 41,83                                |
| hsa-mir-142-5p                      | 1,24                                 | hsa-mir-106a                                     | 40,72                                |
| hsa-mir-146a                        | 3,74                                 | hsa-let-7g                                       | 36,48                                |
| hsa-mir-146b                        | 7,55                                 | RNU43                                            | 35,59                                |
| hsa-mir-146b-3p                     | 0,08                                 | hsa-mir-320                                      | 31,12                                |
| hsa-mir-148a                        | 1,88                                 | hsa-mir-26b                                      | 28,95                                |
| hsa-mir-148b                        | 0,11                                 | hsa-let-7b                                       | 21,04                                |
| hsa-mir-148bx                       | 0,02                                 | RNU6B                                            | 15,96                                |
| hsa-mir-150                         | 8181,10                              | hsa-let-7a                                       | 15,84                                |
| hsa-mir-151-3p                      | 0,94                                 | hsa-mir-15b                                      | 14,01                                |
| hsa-mir-152                         | 0,06                                 | hsa-mir-331                                      | 12,33                                |
| hsa-mir-155-3p                      | 0,15                                 | hsa-let-7d                                       | 11,96                                |
| hsa-mir-15a                         | 0,32                                 | hsa-mir-484                                      | 11,91                                |
| hsa-mir-15ax                        | 0,03                                 | hsa-mir-30a-5p                                   | 11,23                                |
| hsa-mir-15b                         | 14,01                                | hsa-mir-29c                                      | 11,13                                |
| hsa-mir-16                          | 41,83                                | hsa-mir-106b                                     | 10,90                                |
| hsa-mir-16-1x                       | 0,04                                 | hsa-mir-132-3p                                   | 8,99                                 |
| hsa-mir-17                          | 45,05                                | hsa-mir-28-3p                                    | 8,50                                 |
| hsa-mir-17x                         | 0,02                                 | hsa-mir-188-5p                                   | 8,16                                 |
| hsa-mir-181a                        | 0,02                                 | hsa-mir-146b                                     | 7,55                                 |
| hsa-mir-186                         | 4,31                                 | hsa-mir-28                                       | 7,42                                 |

|                 |        |                 |      |
|-----------------|--------|-----------------|------|
| hsa-mir-188-5p  | 8,16   | hsa-mir-30e     | 6,63 |
| hsa-mir-18a     | 0,93   | hsa-mir-20b     | 5,94 |
| hsa-mir-190b    | 2,22   | hsa-mir-768-5p  | 5,75 |
| hsa-mir-191     | 95,01  | hsa-mir-25      | 5,59 |
| hsa-mir-192     | 0,38   | hsa-mir-34a     | 5,57 |
| hsa-mir-193a-5p | 0,13   | hsa-mir-103     | 4,95 |
| hsa-mir-193b    | 0,77   | hsa-mir-374     | 4,82 |
| hsa-mir-194     | 0,23   | hsa-mir-625x    | 4,72 |
| hsa-mir-195     | 2,97   | hsa-mir-186     | 4,31 |
| hsa-mir-197     | 3,48   | hsa-mir-146a    | 3,74 |
| hsa-mir-199a-3p | 0,05   | hsa-mir-197     | 3,48 |
| hsa-mir-19a     | 3,30   | hsa-mir-30e-3p  | 3,41 |
| hsa-mir-19b     | 130,89 | hsa-mir-19a     | 3,30 |
| hsa-mir-19b-1x  | 0,15   | hsa-mir-339-5p  | 3,16 |
| hsa-mir-200b    | 0,18   | hsa-mir-328     | 3,09 |
| hsa-mir-200c    | 2,15   | hsa-mir-195     | 2,97 |
| hsa-mir-20a     | 71,89  | hsa-mir-766     | 2,70 |
| hsa-mir-20ax    | 0,06   | hsa-mir-574-3p  | 2,60 |
| hsa-mir-20b     | 5,94   | hsa-mir-30d     | 2,53 |
| hsa-mir-21      | 68,92  | hsa-mir-660     | 2,35 |
| hsa-mir-21x     | 0,21   | hsa-let-7f      | 2,29 |
| hsa-mir-212     | 0,13   | hsa-mir-190b    | 2,22 |
| hsa-mir-22x     | 0,07   | hsa-mir-200c    | 2,15 |
| hsa-mir-221     | 0,08   | hsa-mir-532     | 2,12 |
| hsa-mir-222     | 42,35  | hsa-mir-532-3p  | 2,03 |
| hsa-mir-223     | 257,22 | hsa-mir-148a    | 1,88 |
| hsa-mir-223x    | 1,06   | hsa-mir-342-5p  | 1,85 |
| hsa-mir-24      | 44,73  | hsa-mir-520c-3p | 1,75 |
| hsa-mir-25      | 5,59   | hsa-mir-610     | 1,63 |
| hsa-mir-26a     | 75,12  | hsa-mir-744     | 1,50 |
| hsa-mir-26b     | 28,95  | hsa-mir-423-5p  | 1,44 |
| hsa-mir-26bx    | 0,03   | hsa-mir-142-5p  | 1,24 |
| hsa-mir-27a     | 0,68   | hsa-mir-27ax    | 1,23 |
| hsa-mir-27ax    | 1,23   | hsa-mir-29b     | 1,21 |
| hsa-mir-27b     | 0,10   | hsa-mir-378     | 1,15 |
| hsa-mir-28      | 7,42   | hsa-mir-760     | 1,07 |
| hsa-mir-28-3p   | 8,50   | hsa-mir-223x    | 1,06 |
| hsa-mir-296     | 0,46   | hsa-mir-151-3p  | 0,94 |
| hsa-mir-29a     | 69,64  | hsa-mir-18a     | 0,93 |
| hsa-mir-29ax    | 0,63   | hsa-mir-590-5p  | 0,88 |
| hsa-mir-29b     | 1,21   | hsa-mir-526bx   | 0,86 |
| hsa-mir-29b-1x  | 0,19   | hsa-mir-138-1x  | 0,84 |
| hsa-mir-29b-2x  | 0,12   | hsa-mir-193b    | 0,77 |
| hsa-mir-29c     | 11,13  | hsa-mir-101     | 0,73 |
| hsa-mir-301     | 0,14   | hsa-mir-454     | 0,71 |
| hsa-mir-30a-3p  | 0,19   | hsa-mir-601     | 0,68 |
| hsa-mir-30a-5p  | 11,23  | hsa-mir-27a     | 0,68 |

|                 |       |                 |      |
|-----------------|-------|-----------------|------|
| hsa-mir-30b     | 57,54 | hsa-mir-29ax    | 0,63 |
| hsa-mir-30c     | 59,56 | hsa-mir-339-3p  | 0,62 |
| hsa-mir-30d     | 2,53  | hsa-mir-324-3p  | 0,59 |
| hsa-mir-30dx    | 0,32  | hsa-mir-652     | 0,55 |
| hsa-mir-30e     | 6,63  | hsa-mir-92a-1x  | 0,47 |
| hsa-mir-30e-3p  | 3,41  | hsa-mir-296     | 0,46 |
| hsa-mir-320     | 31,12 | hsa-mir-513-3p  | 0,45 |
| hsa-mir-324-3p  | 0,59  | hsa-mir-769-5p  | 0,44 |
| hsa-mir-324-5p  | 0,36  | hsa-mir-516-3p  | 0,43 |
| hsa-mir-328     | 3,09  | hsa-mir-505x    | 0,40 |
| hsa-mir-330     | 0,12  | hsa-mir-192     | 0,38 |
| hsa-mir-331     | 12,33 | hsa-mir-886-3p  | 0,37 |
| hsa-mir-335     | 0,25  | hsa-mir-324-5p  | 0,36 |
| hsa-mir-335x    | 0,08  | hsa-mir-345     | 0,34 |
| hsa-mir-339-3p  | 0,62  | hsa-mir-15a     | 0,32 |
| hsa-mir-339-5p  | 3,16  | hsa-mir-30dx    | 0,32 |
| hsa-mir-33ax    | 0,03  | hsa-mir-34ax    | 0,29 |
| hsa-mir-340     | 0,20  | hsa-mir-128a    | 0,29 |
| hsa-mir-340x    | 0,21  | hsa-mir-486-3p  | 0,28 |
| hsa-mir-342-3p  | 71,80 | hsa-let-7c      | 0,27 |
| hsa-mir-342-5p  | 1,85  | hsa-mir-598     | 0,26 |
| hsa-mir-345     | 0,34  | hsa-mir-140-3p  | 0,25 |
| hsa-mir-34a     | 5,57  | hsa-mir-335     | 0,25 |
| hsa-mir-34ax    | 0,29  | hsa-mir-130b    | 0,24 |
| hsa-mir-361     | 0,22  | hsa-mir-671-3p  | 0,23 |
| hsa-mir-362     | 0,07  | hsa-mir-194     | 0,23 |
| hsa-mir-362-3p  | 0,04  | hsa-mir-632     | 0,22 |
| hsa-mir-365     | 0,11  | hsa-mir-361     | 0,22 |
| hsa-mir-374     | 4,82  | hsa-mir-21x     | 0,21 |
| hsa-mir-378     | 1,15  | hsa-mir-629     | 0,21 |
| hsa-mir-422a    | 0,06  | hsa-mir-340x    | 0,21 |
| hsa-mir-423-5p  | 1,44  | hsa-mir-340     | 0,20 |
| hsa-mir-425x    | 0,06  | hsa-mir-30a-3p  | 0,19 |
| hsa-mir-454     | 0,71  | hsa-mir-29b-1x  | 0,19 |
| hsa-mir-483-5p  | 0,05  | hsa-mir-625     | 0,19 |
| hsa-mir-484     | 11,91 | hsa-mir-200b    | 0,18 |
| hsa-mir-486-3p  | 0,28  | hsa-mir-155-3p  | 0,15 |
| hsa-mir-489     | 0,07  | hsa-mir-19b-1x  | 0,15 |
| hsa-mir-494     | 0,10  | hsa-mir-301     | 0,14 |
| hsa-mir-500     | 0,10  | hsa-mir-212     | 0,13 |
| hsa-mir-502-3p  | 0,11  | hsa-mir-193a-5p | 0,13 |
| hsa-mir-505x    | 0,40  | hsa-mir-330     | 0,12 |
| hsa-mir-509-3p  | 0,05  | hsa-mir-95      | 0,12 |
| hsa-mir-513-3p  | 0,45  | hsa-mir-29b-2x  | 0,12 |
| hsa-mir-516-3p  | 0,43  | hsa-mir-502-3p  | 0,11 |
| hsa-mir-520c-3p | 1,75  | hsa-mir-365     | 0,11 |
| hsa-mir-520d-5p | 0,02  | hsa-mir-148b    | 0,11 |

|                |         |                 |      |
|----------------|---------|-----------------|------|
| hsa-mir-526bx  | 0,86    | hsa-mir-642     | 0,10 |
| hsa-mir-532    | 2,12    | hsa-mir-500     | 0,10 |
| hsa-mir-532-3p | 2,03    | hsa-mir-494     | 0,10 |
| hsa-mir-574-3p | 2,60    | hsa-mir-27b     | 0,10 |
| hsa-mir-576-3p | 0,02    | hsa-mir-146b-3p | 0,08 |
| hsa-mir-579    | 0,05    | hsa-mir-93x     | 0,08 |
| hsa-mir-590-5p | 0,88    | hsa-mir-875-5p  | 0,08 |
| hsa-mir-597    | 0,04    | U47             | 0,08 |
| hsa-mir-598    | 0,26    | hsa-mir-335x    | 0,08 |
| hsa-mir-601    | 0,68    | hsa-mir-221     | 0,08 |
| hsa-mir-610    | 1,63    | hsa-mir-638     | 0,07 |
| hsa-mir-625    | 0,19    | hsa-mir-22x     | 0,07 |
| hsa-mir-625x   | 4,72    | hsa-mir-489     | 0,07 |
| hsa-mir-628-5p | 0,04    | hsa-mir-886-5p  | 0,07 |
| hsa-mir-629    | 0,21    | hsa-mir-362     | 0,07 |
| hsa-mir-632    | 0,22    | hsa-mir-942     | 0,06 |
| hsa-mir-636    | 0,02    | hsa-mir-425x    | 0,06 |
| hsa-mir-638    | 0,07    | hsa-mir-422a    | 0,06 |
| hsa-mir-642    | 0,10    | hsa-mir-152     | 0,06 |
| hsa-mir-645    | 0,04    | hsa-mir-20ax    | 0,06 |
| hsa-mir-652    | 0,55    | hsa-mir-126x    | 0,06 |
| hsa-mir-660    | 2,35    | hsa-mir-509-3p  | 0,05 |
| hsa-mir-671-3p | 0,23    | hsa-mir-126     | 0,05 |
| hsa-mir-744    | 1,50    | hsa-mir-579     | 0,05 |
| hsa-mir-760    | 1,07    | hsa-mir-199a-3p | 0,05 |
| hsa-mir-766    | 2,70    | hsa-mir-483-5p  | 0,05 |
| hsa-mir-768-3p | 355,14  | hsa-mir-141     | 0,05 |
| hsa-mir-768-5p | 5,75    | hsa-mir-597     | 0,04 |
| hsa-mir-769-5p | 0,44    | hsa-mir-362-3p  | 0,04 |
| hsa-mir-875-5p | 0,08    | hsa-mir-645     | 0,04 |
| hsa-mir-886-3p | 0,37    | hsa-mir-16-1x   | 0,04 |
| hsa-mir-886-5p | 0,07    | hsa-mir-628-5p  | 0,04 |
| hsa-mir-9x     | 0,01    | hsa-mir-15ax    | 0,03 |
| hsa-mir-923    | 43,28   | hsa-mir-26bx    | 0,03 |
| hsa-mir-92a    | 75,08   | hsa-mir-33ax    | 0,03 |
| hsa-mir-92a-1x | 0,47    | hsa-mir-181a    | 0,02 |
| hsa-mir-93x    | 0,08    | hsa-mir-132-5p  | 0,02 |
| hsa-mir-942    | 0,06    | hsa-mir-520d-5p | 0,02 |
| hsa-mir-95     | 0,12    | hsa-mir-17x     | 0,02 |
| hsa-mir-99b    | 0,01    | hsa-mir-125a-5p | 0,02 |
| RNU24          | 80,64   | hsa-mir-576-3p  | 0,02 |
| RNU43          | 35,59   | hsa-mir-135a    | 0,02 |
| RNU44          | 647,65  | hsa-mir-636     | 0,02 |
| RNU48          | 4417,19 | hsa-mir-148bx   | 0,02 |
| RNU6B          | 15,96   | hsa-mir-9x      | 0,01 |
| U47            | 0,08    | hsa-mir-99b     | 0,01 |
| U6             | 6885,86 | hsa-mir-127     | 0,01 |
