# Supplementary material for: CLL Cells Respond to B-Cell Receptor Stimulation with a MicroRNA/mRNA Signature Associated with MYC Activation and Cell Cycle Progression
Source: PubMed Central journal article supplement (PMC3613353; doi:10.1371/journal.pone.0060275), 2013-04-01
Supplement: pone.0060275.s013.pdf [file pone.0060275.s013.pdf]

| 3 hours        |           |          | 24 hours       |          |            |
|----------------|-----------|----------|----------------|----------|------------|
| miRNA          | pfp       | FC       | miRNA          | pfp      | FC         |
| hsa-mir-212    |           | 0 17,708 | hsa-mir-132-3p |          | 0 12,46797 |
| hsa-mir-132-3p |           | 0 7,2312 | hsa-mir-212    |          | 0 20,91016 |
| hsa-mir-155-3p | 0,0214    | 2,9114   | hsa-mir-155-3p | 0,0124   | 2,764777   |
| hsa-mir-20ax   | 0,0255    | 2,4697   | hsa-mir-27ax   | 0,061    | 2,249485   |
| hsa-mir-132-5p | 0,0293333 | 3,1096   | hsa-mir-146a   | 0,172857 | 1,863078   |
| hsa-mir-19b-1x | 0,035     | 2,9036   | hsa-mir-513-3p | 0,210625 | 1,593694   |
| hsa-mir-92a-1x | 0,10875   | 2,511    | hsa-mir-22x    | 0,22475  | 1,698288   |
| hsa-mir-148a   | 0,3352    | 1,1824   | hsa-mir-92a-1x | 0,233    | 1,819702   |
| hsa-mir-27ax   | 0,3757273 | 2,0994   | hsa-mir-601    | 0,2388   | 1,583076   |
| hsa-mir-17x    | 0,5401333 | 1,7245   | hsa-mir-190b   | 0,255556 | 1,530512   |
| hsa-mir-29b-1x | 0,5491875 | 1,8077   | hsa-mir-516-3p | 0,261267 | 1,582274   |
| hsa-mir-636    | 0,5577647 | 1,6385   | hsa-mir-132-5p | 0,271643 | 1,749023   |
| hsa-mir-21x    | 0,5598571 | 1,9041   | hsa-mir-19b-1x | 0,284    | 1,707217   |
| hsa-mir-126    | 0,5818462 | 1,0485   | hsa-mir-188-5p | 0,314563 | 1,255524   |
| hsa-mir-221    | 0,60225   | 1,3216   | hsa-mir-34ax   | 0,421647 | 1,516603   |
| hsa-mir-33ax   | 0,6456111 | 1,4749   | hsa-mir-671-3p | 0,425105 | 1,568038   |
| hsa-mir-127    | 0,9346842 | 1,1554   | hsa-mir-148a   | 0,430667 | 1,204139   |
| hsa-mir-766    | 0,9424167 | 0,8197   | hsa-mir-21x    | 0,436091 | 1,449851   |
| hsa-mir-330    | 0,9440279 | 0,855    | hsa-mir-33ax   | 0,442143 | 1,354462   |
| hsa-mir-331    | 0,9471703 | 0,8855   | hsa-mir-18a    | 0,46105  | 1,404634   |
| hsa-mir-484    | 0,9472955 | 0,8452   | hsa-mir-489    | 0,486652 | 1,28718    |
| hsa-mir-324-5p | 0,9483842 | 0,923    | hsa-mir-422a   | 0,546875 | 1,353562   |
| hsa-mir-361    | 0,9493315 | 0,8201   | hsa-mir-17x    | 0,57036  | 1,21315    |
| hsa-mir-532-3p | 0,9518057 | 0,887    | hsa-mir-509-3p | 0,648615 | 1,223682   |
| hsa-mir-486-3p | 0,951989  | 0,7549   | hsa-mir-9x     | 0,708536 | 1,016985   |
| hsa-mir-191    | 0,9521214 | 0,8554   | hsa-mir-20ax   | 0,709889 | 1,037222   |
| hsa-mir-625x   | 0,9533023 | 0,7529   | hsa-mir-29b-1x | 0,7177   | 1,230044   |
| hsa-mir-769-5p | 0,956092  | 0,8879   | hsa-mir-135a   | 0,718793 | 1,131886   |
| hsa-mir-339-3p | 0,9576885 | 0,7997   | hsa-mir-20b    | 0,793286 | 1,211465   |
| hsa-let-7g     | 0,957807  | 0,9567   | hsa-mir-17     | 0,813848 | 1,23746    |
| hsa-mir-197    | 0,9604076 | 0,8005   | hsa-mir-106a   | 0,814441 | 1,246792   |
| RNU48          | 0,9604919 | 0,7785   | hsa-mir-632    | 0,828432 | 1,166086   |
| hsa-mir-768-3p | 0,9621647 | 0,8644   | hsa-mir-193b   | 0,831781 | 1,14467    |
| hsa-mir-489    | 0,9676923 | 0,6906   | hsa-mir-629    | 0,851389 | 1,204837   |
| hsa-mir-222    | 0,9677917 | 0,9495   | hsa-mir-610    | 0,85229  | 1,16358    |
| hsa-mir-339-5p | 0,9728323 | 0,7738   | hsa-mir-486-3p | 0,989332 | 0,486097   |
| hsa-mir-128a   | 0,9769458 | 0,886    | hsa-mir-25     | 0,994437 | 0,610173   |
| RNU24          | 0,9789879 | 0,8806   | hsa-mir-324-3p | 0,995514 | 0,608823   |
| hsa-mir-425x   | 0,983311  | 0,8135   | hsa-mir-26a    | 0,99761  | 0,568853   |
| hsa-mir-671-3p | 0,9845645 | 0,7427   | hsa-mir-769-5p | 0,997968 | 0,483546   |
| hsa-mir-652    | 0,9869571 | 0,7988   | hsa-mir-345    | 0,999081 | 0,317731   |
| hsa-mir-494    | 0,9897019 | 0,8274   | hsa-mir-766    | 0,999883 | 0,650218   |
| hsa-mir-744    | 0,9910062 | 0,8179   | hsa-mir-26b    | 1,002687 | 0,57144    |
| hsa-mir-24     | 0,994     | 0,9591   | hsa-mir-15b    | 1,007831 | 0,601186   |

|                |           |        |                |          |          |
|----------------|-----------|--------|----------------|----------|----------|
| hsa-mir-875-5p | 0,9969551 | 0,6356 | hsa-mir-598    | 1,012638 | 0,562559 |
| hsa-mir-28-3p  | 0,9983822 | 0,9086 | hsa-let-7a     | 1,014057 | 0,56493  |
| hsa-mir-342-3p | 1,0000943 | 0,9204 | hsa-let-7d     | 1,017971 | 0,645404 |
| hsa-mir-502-3p | 1,0024968 | 0,9685 | hsa-let-7e     | 1,023753 | 0,63829  |
| hsa-let-7e     | 1,0042595 | 0,9403 | hsa-mir-197    | 1,029503 | 0,595364 |
| hsa-mir-454    | 1,0080325 | 0,9951 | hsa-mir-423-5p | 1,030349 | 0,608936 |
| hsa-mir-324-3p | 1,0102876 | 0,9574 | hsa-let-7g     | 1,036175 | 0,629758 |
| hsa-mir-28     | 1,0135197 | 0,9648 | hsa-mir-30b    | 1,040347 | 0,615677 |
| hsa-mir-320    | 1,0187881 | 0,9138 | hsa-mir-30dx   | 1,042474 | 1,114413 |
| hsa-mir-378    | 1,02152   | 0,8735 | hsa-mir-625    | 1,045544 | 0,617888 |
| hsa-mir-93x    | 1,0282282 | 0,9835 | hsa-mir-30c    | 1,049503 | 0,63463  |
| hsa-mir-140-3p | 1,0349054 | 0,9672 | hsa-mir-28     | 1,050583 | 0,626626 |
| hsa-mir-30d    | 1,0361497 | 1,0095 | hsa-mir-103    | 1,052416 | 0,664028 |
| hsa-mir-513-3p | 1,0374384 | 0,4617 | hsa-mir-652    | 1,055224 | 0,578305 |
| hsa-mir-103    | 1,0436207 | 0,9941 | hsa-mir-638    | 1,06122  | 0,54136  |
| hsa-mir-15b    | 1,0502083 | 0,9817 | hsa-mir-301    | 1,064847 | 0,622188 |
| hsa-mir-92a    | 1,0504196 | 0,9798 | hsa-mir-328    | 1,065716 | 0,582397 |
| hsa-mir-342-5p | 1,0535141 | 0,8469 | hsa-mir-93x    | 1,071615 | 0,693178 |
| hsa-mir-95     | 1,0572482 | 0,9153 | hsa-mir-28-3p  | 1,07522  | 0,655729 |
| hsa-mir-25     | 1,0634    | 1,0158 | hsa-mir-26bx   | 1,078113 | 0,658282 |
| hsa-mir-223    | 1,0672662 | 0,9715 | hsa-mir-29b-2x | 1,079823 | 0,567811 |
| RNU44          | 1,072058  | 0,9192 | hsa-mir-195    | 1,083277 | 0,633273 |
| hsa-mir-17     | 1,0754963 | 1,0508 | hsa-mir-30d    | 1,085987 | 0,705829 |
| hsa-mir-505x   | 1,077375  | 0,9111 | hsa-mir-186    | 1,08614  | 0,679737 |
| hsa-mir-30a-5p | 1,0781168 | 1,036  | hsa-let-7f     | 1,088682 | 0,722207 |
| hsa-let-7d     | 1,083291  | 0,9873 | RNU48          | 1,093412 | 0,670175 |
| hsa-mir-15a    | 1,0873864 | 0,9323 | hsa-mir-768-5p | 1,100072 | 0,584645 |
| hsa-mir-148b   | 1,0886767 | 1,0091 | hsa-mir-106b   | 1,106702 | 0,656901 |
| hsa-mir-923    | 1,0894286 | 1,4345 | hsa-mir-30a-5p | 1,11192  | 0,715042 |
| hsa-let-7a     | 1,0900534 | 0,9716 | hsa-mir-500    | 1,118289 | 0,549484 |
| hsa-mir-186    | 1,0921008 | 1,0459 | hsa-mir-30e    | 1,123426 | 0,678067 |
| hsa-mir-328    | 1,0975547 | 0,8514 | hsa-mir-30e-3p | 1,130551 | 0,728863 |
| hsa-mir-29b-2x | 1,0979923 | 0,8674 | hsa-mir-342-3p | 1,137856 | 0,70114  |
| hsa-mir-532    | 1,098216  | 1,0196 | hsa-mir-331    | 1,145655 | 0,746754 |
| hsa-mir-576-3p | 1,0992742 | 0,9486 | hsa-mir-150    | 1,150417 | 0,697067 |
| hsa-mir-598    | 1,1030157 | 1,0109 | hsa-mir-128a   | 1,156993 | 0,700806 |
| hsa-mir-22x    | 1,1043636 | 1,57   | hsa-mir-361    | 1,160528 | 0,567033 |
| hsa-mir-126x   | 1,10468   | 1,0815 | hsa-mir-130b   | 1,162625 | 1,134357 |
| hsa-mir-106a   | 1,106626  | 1,0772 | hsa-mir-148b   | 1,167915 | 0,689324 |
| hsa-mir-30c    | 1,1090164 | 1,0618 | hsa-mir-27a    | 1,168615 | 1,006588 |
| hsa-mir-579    | 1,1103254 | 0,9907 | hsa-mir-340x   | 1,173199 | 0,713683 |
| hsa-mir-106b   | 1,1149504 | 1,0283 | hsa-mir-660    | 1,176058 | 0,646157 |
| hsa-mir-340x   | 1,11785   | 1,0482 | hsa-mir-140-3p | 1,176236 | 0,684584 |
| hsa-mir-335x   | 1,1193051 | 0,948  | hsa-mir-127    | 1,17707  | 0,732713 |
| hsa-mir-574-3p | 1,1211513 | 0,9583 | hsa-mir-142-3p | 1,179933 | 0,593012 |
| hsa-mir-362    | 1,1259145 | 1,0738 | hsa-mir-454    | 1,180459 | 0,721006 |
| hsa-mir-483-5p | 1,1294    | 1,3036 | hsa-mir-223    | 1,180576 | 0,624352 |

|                 |           |        |                 |          |          |
|-----------------|-----------|--------|-----------------|----------|----------|
| hsa-let-7f      | 1,1337931 | 1,0723 | hsa-mir-15a     | 1,181321 | 0,679653 |
| hsa-mir-301     | 1,1352609 | 1,042  | hsa-mir-152     | 1,183576 | 0,933966 |
| hsa-mir-135a    | 1,13725   | 1,196  | hsa-let-7c      | 1,184196 | 0,621466 |
| hsa-mir-422a    | 1,1387281 | 0,9034 | hsa-mir-19b     | 1,184516 | 0,93277  |
| hsa-mir-625     | 1,1401182 | 0,9862 | hsa-mir-374     | 1,184646 | 0,676863 |
| hsa-mir-20b     | 1,1432018 | 1,1279 | hsa-mir-342-5p  | 1,187318 | 0,604775 |
| hsa-mir-26bx    | 1,1441504 | 0,9417 | hsa-mir-597     | 1,189176 | 1,009662 |
| hsa-mir-146a    | 1,145     | 1,1824 | hsa-mir-24      | 1,190119 | 0,977427 |
| hsa-mir-192     | 1,1473796 | 1,0799 | hsa-mir-148bx   | 1,190214 | 0,755589 |
| hsa-mir-30e-3p  | 1,1483929 | 1,1049 | hsa-mir-532-3p  | 1,19158  | 0,76816  |
| hsa-mir-597     | 1,1546542 | 1,0892 | hsa-mir-221     | 1,194317 | 0,668969 |
| hsa-mir-200c    | 1,156018  | 0,9603 | hsa-mir-194     | 1,194563 | 0,671858 |
| hsa-mir-27b     | 1,1629528 | 0,8328 | hsa-mir-142-5p  | 1,195154 | 0,647894 |
| hsa-mir-423-5p  | 1,1677429 | 1,0136 | RNU24           | 1,196923 | 0,92452  |
| hsa-mir-150     | 1,1708077 | 1,7205 | hsa-mir-502-3p  | 1,199368 | 0,79738  |
| hsa-mir-190b    | 1,1763689 | 0,589  | hsa-mir-365     | 1,201316 | 1,039124 |
| hsa-mir-26a     | 1,1788846 | 1,0842 | hsa-mir-16      | 1,201331 | 0,650323 |
| hsa-mir-500     | 1,1818039 | 0,9467 | hsa-mir-335x    | 1,202279 | 0,54669  |
| hsa-mir-15ax    | 1,1832079 | 0,9662 | U6              | 1,202619 | 1,088179 |
| hsa-mir-142-3p  | 1,1892088 | 1,0598 | hsa-mir-20a     | 1,203098 | 1,039815 |
| hsa-mir-181a    | 1,1921481 | 0,9611 | hsa-mir-126     | 1,204318 | 0,558182 |
| hsa-mir-30a-3p  | 1,19375   | 1,1349 | hsa-mir-324-5p  | 1,204602 | 0,742154 |
| hsa-mir-30e     | 1,1979889 | 1,1275 | hsa-mir-29a     | 1,207779 | 0,669921 |
| hsa-mir-20a     | 1,2046869 | 1,1017 | hsa-mir-16-1x   | 1,208696 | 0,768848 |
| hsa-mir-130b    | 1,204764  | 1,0519 | hsa-mir-923     | 1,2123   | 0,896693 |
| hsa-mir-516-3p  | 1,2048261 | 0,6916 | hsa-mir-483-5p  | 1,212435 | 0,883971 |
| hsa-mir-30b     | 1,2058977 | 1,1384 | RNU43           | 1,213871 | 0,918812 |
| hsa-mir-223x    | 1,208051  | 1,0206 | hsa-mir-768-3p  | 1,215438 | 0,70327  |
| hsa-mir-146b-3p | 1,2089787 | 0,9399 | hsa-mir-15ax    | 1,215557 | 0,872792 |
| hsa-mir-629     | 1,2121474 | 1,0883 | hsa-let-7b      | 1,222333 | 0,654244 |
| hsa-mir-296     | 1,2133021 | 0,8284 | hsa-mir-628-5p  | 1,225667 | 0,970527 |
| hsa-mir-660     | 1,2162069 | 1,1167 | hsa-mir-875-5p  | 1,225844 | 1,066108 |
| hsa-mir-16      | 1,217093  | 1,0523 | hsa-mir-95      | 1,226176 | 0,674189 |
| hsa-mir-148bx   | 1,2180206 | 1,1285 | hsa-mir-34a     | 1,228255 | 0,855748 |
| hsa-mir-628-5p  | 1,2195591 | 1,09   | hsa-mir-378     | 1,229576 | 1,097297 |
| hsa-mir-362-3p  | 1,2303214 | 1,3437 | hsa-mir-520d-5p | 1,230042 | 0,917124 |
| hsa-mir-151-3p  | 1,2306    | 0,9245 | hsa-mir-138-1x  | 1,232714 | 1,073849 |
| hsa-mir-34a     | 1,2317976 | 0,9353 | hsa-mir-339-3p  | 1,232743 | 0,999446 |
| hsa-mir-138-1x  | 1,2354337 | 0,9676 | hsa-mir-340     | 1,23341  | 0,676084 |
| hsa-mir-195     | 1,2446951 | 1,0617 | hsa-mir-526bx   | 1,233986 | 0,961345 |
| U47             | 1,2497308 | 0,9783 | hsa-mir-505x    | 1,235983 | 0,786705 |
| hsa-mir-188-5p  | 1,2559041 | 0,7302 | hsa-mir-942     | 1,238027 | 0,898691 |
| hsa-mir-135ax   | 1,2569375 | 0,9844 | hsa-mir-193a-5p | 1,24086  | 1,016276 |
| hsa-let-7c      | 1,2574074 | 0,9031 | hsa-mir-494     | 1,241431 | 1,02849  |
| hsa-mir-152     | 1,2585065 | 1,0975 | hsa-mir-19a     | 1,242815 | 0,97003  |
| hsa-mir-200b    | 1,2592639 | 1,0513 | hsa-mir-320     | 1,243431 | 0,813227 |
| RNU6B           | 1,2611266 | 1,0894 | hsa-mir-92a     | 1,245104 | 1,103009 |

|                 |           |        |                 |          |          |
|-----------------|-----------|--------|-----------------|----------|----------|
| hsa-mir-194     | 1,2636933 | 1,1277 | hsa-mir-126x    | 1,247245 | 0,59167  |
| hsa-let-7b      | 1,2673382 | 0,9346 | hsa-mir-141     | 1,247287 | 0,718345 |
| hsa-mir-142-5p  | 1,273     | 1,1342 | hsa-mir-146b    | 1,24831  | 0,862686 |
| U6              | 1,2737162 | 1,0203 | hsa-mir-199a-3p | 1,248473 | 0,474679 |
| hsa-mir-26b     | 1,2744737 | 1,1343 | hsa-mir-532     | 1,255307 | 0,737118 |
| hsa-mir-141     | 1,2752754 | 1,1746 | hsa-mir-191     | 1,256265 | 0,758581 |
| hsa-mir-34ax    | 1,2752817 | 1,0655 | hsa-mir-579     | 1,258982 | 0,819928 |
| hsa-mir-632     | 1,2769692 | 0,8691 | U47             | 1,260215 | 0,706529 |
| hsa-mir-193b    | 1,2776212 | 0,9532 | hsa-mir-590-5p  | 1,26308  | 0,675336 |
| hsa-mir-29c     | 1,2898    | 1,0932 | hsa-mir-29c     | 1,267176 | 0,63206  |
| hsa-mir-16-1x   | 1,2900328 | 1,0806 | RNU6B           | 1,267885 | 1,064096 |
| hsa-mir-768-5p  | 1,2924857 | 1,0355 | hsa-mir-625x    | 1,268383 | 0,935981 |
| hsa-mir-29a     | 1,2954063 | 1,1406 | hsa-mir-223x    | 1,270906 | 0,675385 |
| hsa-mir-590-5p  | 1,3033333 | 1,1267 | hsa-mir-101     | 1,273784 | 0,627857 |
| hsa-mir-638     | 1,3042333 | 0,9747 | hsa-mir-744     | 1,274452 | 0,801434 |
| hsa-mir-526bx   | 1,3077937 | 1,0998 | hsa-mir-222     | 1,276233 | 0,822618 |
| hsa-mir-146b    | 1,3160377 | 1,0646 | hsa-mir-760     | 1,276638 | 0,832594 |
| hsa-mir-125a-5p | 1,3219153 | 0,9005 | hsa-mir-29b     | 1,284343 | 0,642922 |
| hsa-mir-601     | 1,3225968 | 0,6456 | hsa-mir-335     | 1,287554 | 0,634917 |
| hsa-mir-18a     | 1,3290192 | 1,2892 | hsa-mir-27b     | 1,295043 | 0,995371 |
| hsa-mir-99b     | 1,3367679 | 0,8794 | hsa-mir-151-3p  | 1,29856  | 0,562164 |
| hsa-mir-335     | 1,3385517 | 1,048  | hsa-mir-576-3p  | 1,306755 | 0,840212 |
| hsa-mir-645     | 1,3470784 | 1,0122 | hsa-mir-362     | 1,309707 | 0,882644 |
| hsa-mir-29b     | 1,3506333 | 1,2287 | hsa-mir-192     | 1,314237 | 0,730469 |
| hsa-mir-760     | 1,3566491 | 1,0367 | hsa-mir-21      | 1,317935 | 0,713729 |
| hsa-mir-9x      | 1,36976   | 1,0315 | hsa-mir-645     | 1,320088 | 0,809214 |
| hsa-mir-374     | 1,3830612 | 1,18   | hsa-mir-520c-3p | 1,32456  | 0,904319 |
| hsa-mir-520d-5p | 1,3842414 | 1,2933 | hsa-mir-339-5p  | 1,327427 | 0,781536 |
| hsa-mir-19a     | 1,3861951 | 1,2702 | hsa-mir-29ax    | 1,329043 | 0,777857 |
| hsa-mir-365     | 1,3914359 | 1,2218 | hsa-mir-484     | 1,334033 | 0,848225 |
| hsa-mir-642     | 1,4042826 | 0,9584 | hsa-mir-574-3p  | 1,335579 | 0,743465 |
| hsa-mir-340     | 1,4071136 | 1,2367 | hsa-mir-296     | 1,339068 | 0,728576 |
| hsa-mir-520c-3p | 1,4083333 | 1,069  | hsa-mir-425x    | 1,339609 | 0,840965 |
| hsa-mir-610     | 1,4135    | 0,7802 | hsa-mir-125a-5p | 1,342228 | 0,755106 |
| hsa-mir-193a-5p | 1,4201489 | 1,0379 | hsa-mir-200b    | 1,342531 | 0,75431  |
| hsa-mir-19b     | 1,4246    | 1,2339 | hsa-mir-362-3p  | 1,344085 | 0,763326 |
| hsa-mir-345     | 1,4251935 | 1,4287 | hsa-mir-181a    | 1,345463 | 0,628702 |
| hsa-mir-509-3p  | 1,4252105 | 0,6839 | hsa-mir-146b-3p | 1,346663 | 0,755628 |
| hsa-mir-101     | 1,4340233 | 1,1072 | hsa-mir-135ax   | 1,347977 | 0,909521 |
| hsa-mir-29ax    | 1,4413571 | 1,2176 | hsa-mir-200c    | 1,349397 | 0,848916 |
| hsa-mir-21      | 1,4434722 | 1,177  | hsa-mir-99b     | 1,355792 | 0,775674 |
| hsa-mir-27a     | 1,4446486 | 1,2382 | hsa-mir-642     | 1,356176 | 0,656602 |
| hsa-mir-942     | 1,4787429 | 1,3101 | hsa-mir-636     | 1,356913 | 0,887892 |
| hsa-mir-30dx    | 1,5084706 | 1,3937 | hsa-mir-30a-3p  | 1,366947 | 0,942309 |
| hsa-mir-199a-3p | 1,5155625 | 0,9268 | RNU44           | 1,369857 | 0,859945 |
| RNU43           | 1,5279091 | 1,2505 | hsa-mir-330     | 1,381783 | 0,841806 |
