# Supplementary material for: CLL Cells Respond to B-Cell Receptor Stimulation with a MicroRNA/mRNA Signature Associated with MYC Activation and Cell Cycle Progression
Source: PubMed Central journal article supplement (PMC3613353; doi:10.1371/journal.pone.0060275), 2013-04-01
Supplement: pone.0060275.s014.pdf [file pone.0060275.s014.pdf]

**Table S7: Canonical pathways associated with modulated genes after 3 hours or 24 hours of BCR stimulation.**

| 3 hours of stimulation          |                       | 24 hours of stimulation        |                       |
|---------------------------------|-----------------------|--------------------------------|-----------------------|
| B-cell receptor signaling       | 1.34 10 <sup>-6</sup> | Purine Metabolism              | 3.94 10 <sup>-8</sup> |
| PI3K Signaling in B lymphocytes | 1.75 10 <sup>-6</sup> | TREM1 Signaling                | 1.11 10 <sup>-6</sup> |
| IL-4 Signaling                  | 5.37 10 <sup>-6</sup> | Glycolysis/Gluconeogenesis     | 6.91 10 <sup>-6</sup> |
| Molecular Mechanisms of Cancer  | 5.66 10 <sup>-6</sup> | Pyrimidine Metabolism          | 1.06 10 <sup>-5</sup> |
| Interferon Signaling            | 8.02 10 <sup>-6</sup> | Protein Ubiquitination Pathway | 2.33 10 <sup>-5</sup> |

Canonical pathways most significantly enriched for genes modulated after BCR stimulation for 3 or 24 hours. Significance p value according to Ingenuity IPA<sup>®</sup> software
