# Supplementary material for: CLL Cells Respond to B-Cell Receptor Stimulation with a MicroRNA/mRNA Signature Associated with MYC Activation and Cell Cycle Progression
Source: PubMed Central journal article supplement (PMC3613353; doi:10.1371/journal.pone.0060275), 2013-04-01
Supplement: pone.0060275.s015.pdf [file pone.0060275.s015.pdf]

**Correlation coefficient between gene and miRNA expression**

|           | <b>hsa-miR-132-3p</b> |           | <b>hsa-miR-212</b> |
|-----------|-----------------------|-----------|--------------------|
| VHL       | -0,875                | EDG1      | -0,889             |
| ANKRD28   | -0,865                | KIAA0831  | -0,879             |
| USPL1     | -0,857                | VHL       | -0,875             |
| MAPK8IP3  | -0,847                | LOC731985 | -0,853             |
| KIAA1545  | -0,838                | GDPD3     | -0,850             |
| CBL       | -0,836                | ANKRD28   | -0,843             |
| LAMA5     | -0,836                | CXCR4     | -0,832             |
| EDG1      | -0,835                | LOC648526 | -0,829             |
| ANKRD10   | -0,833                | CYP2U1    | -0,825             |
| NPHP3     | -0,832                | CHD6      | -0,818             |
| ZNF193    | -0,827                | SYF2      | -0,818             |
| CAPRIN2   | -0,826                | KTELC1    | -0,811             |
| EFHC1     | -0,820                | USPL1     | -0,804             |
| LHPP      | -0,820                | MAPK8IP3  | -0,800             |
| CYP2U1    | -0,818                | TSPAN3    | -0,800             |
| CXCR4     | -0,815                | LOC643382 | -0,793             |
| CDK5RAP2  | -0,814                | ARRDC2    | -0,789             |
| LOC727820 | -0,814                | ASTE1     | -0,789             |
| LCOR      | -0,814                | GUCY2C    | -0,786             |
| FLJ39639  | -0,809                | ADRB2     | -0,786             |
| TULP4     | -0,808                | SCARA5    | -0,779             |
| PRKRIP1   | -0,805                | ANKRD49   | -0,775             |
| LOC730256 | -0,803                | THAP2     | -0,768             |
| TMEM188   | -0,800                | ZNF193    | -0,768             |
| MGC24039  | -0,800                | LOC728481 | -0,768             |
| C17ORF56  | -0,797                | PGBD2     | -0,764             |
| KIAA0999  | -0,797                | LRIG1     | -0,764             |
| C1ORF63   | -0,795                | FAM129C   | -0,764             |
| TRABD     | -0,794                | FADS3     | -0,761             |
| ADRB2     | -0,792                | PRKRIP1   | -0,761             |
| KIAA1267  | -0,792                | CRLF3     | -0,761             |
| SLC44A2   | -0,789                | IFNGR2    | -0,761             |
| THSD1P    | -0,788                | ZNF260    | -0,757             |
| ZNF260    | -0,786                | LOC644935 | -0,757             |
| CECR1     | -0,782                | SAMD9     | -0,757             |
| PDCD6IP   | -0,780                | ARRB1     | -0,754             |
| ZNF154    | -0,780                | MSL3L1    | -0,754             |
| HNRNPH2   | -0,779                | B3GALT4   | -0,754             |
| RALGPS1   | -0,779                | LOC652071 | -0,754             |
| EP400     | -0,776                | NUF2      | -0,750             |

|           |        |           |        |
|-----------|--------|-----------|--------|
| KIAA0892  | -0,774 | ZBTB1     | -0,750 |
| P2RY8     | -0,774 | CPNE5     | -0,750 |
| GLTSCR2   | -0,774 | IGBP1     | -0,750 |
| ATM       | -0,773 | EP400     | -0,750 |
| ADAM28    | -0,773 | LOC727820 | -0,746 |
| ZNF688    | -0,771 | ZNF615    | -0,746 |
| YPEL3     | -0,770 | LILRB1    | -0,743 |
| ZCCHC11   | -0,768 | CPEB2     | -0,739 |
| UIMC1     | -0,765 | ABCA7     | -0,739 |
| C6ORF151  | -0,765 | DET1      | -0,739 |
| REM2      | -0,764 | KIAA0999  | -0,739 |
| ABCA7     | -0,764 | LYSMD2    | -0,739 |
| SULT1A4   | -0,764 | ELF2      | -0,736 |
| TRIM33    | -0,764 | TNRC18    | -0,732 |
| ZNF83     | -0,764 | UIMC1     | -0,732 |
| ANKRA2    | -0,764 | LOC728518 | -0,729 |
| KLHDC9    | -0,762 | CCDC106   | -0,729 |
| PAN2      | -0,762 | CRBN      | -0,729 |
| TMEM50B   | -0,762 | SYPL1     | -0,725 |
| GON4L     | -0,761 | PAN2      | -0,725 |
| MKLN1     | -0,761 | PNRC2     | -0,725 |
| KIAA0494  | -0,759 | NDC80     | -0,721 |
| TRAK1     | -0,758 | ADD3      | -0,721 |
| LOC202181 | -0,756 | ZNF277    | -0,721 |
| WBP1      | -0,756 | ZNF33A    | -0,718 |
| LOC653853 | -0,755 | CD46      | -0,718 |
| LOC730994 | -0,755 | LCOR      | -0,718 |
| AHR       | -0,755 | PCMTD1    | -0,718 |
| WDR23     | -0,753 | LOC651324 | -0,714 |
| UNC84A    | -0,753 | LOC641700 | -0,714 |
| LILRB1    | -0,753 | IFIT5     | -0,714 |
| N4BP1     | -0,752 | GPR18     | -0,714 |
| CREBBP    | -0,752 | ZNF816A   | -0,714 |
| CD37      | -0,750 | TMEM50B   | -0,711 |
| ADHFE1    | -0,749 | MGC12760  | -0,707 |
| MCM8      | -0,749 | HSD17B11  | -0,707 |
| C9ORF103  | -0,749 | LAIR1     | -0,707 |
| ADD3      | -0,747 | LOC646200 | -0,707 |
| FNBP4     | -0,747 | ZNF480    | -0,704 |
| RPL32P3   | -0,746 | CAPRIN2   | -0,704 |
| FLJ25778  | -0,746 | CDC42SE2  | -0,704 |
| WDR73     | -0,743 | HSBP1     | -0,702 |
| PAN3      | -0,743 | ZNF540    | -0,700 |
| ZFP90     | -0,743 | SMAD5     | -0,700 |

|           |        |           |        |
|-----------|--------|-----------|--------|
| C21ORF55  | -0,741 | ZNF33B    | -0,700 |
| IL18      | -0,741 | TMEM106B  | -0,700 |
| WDR22     | -0,741 | BCL11A    | -0,700 |
| RERE      | -0,740 | LOC653853 | -0,696 |
| ZBTB4     | -0,740 | FLJ25778  | -0,696 |
| CRYZL1    | -0,738 | LHPP      | -0,696 |
| SHCBP1    | -0,738 | LOC648251 | -0,693 |
| ADAM19    | -0,737 | LOC729446 | -0,693 |
| CRLF3     | -0,737 | MCM8      | -0,693 |
| RBL2      | -0,737 | P2RY8     | -0,693 |
| PTCD3     | -0,735 | LOC389671 | -0,689 |
| C5ORF25   | -0,735 | LOC644222 | -0,689 |
| DMTF1     | -0,734 | ZNF561    | -0,689 |
| XPC       | -0,734 | FLJ20021  | -0,689 |
| LOC642333 | -0,734 | ADAM19    | -0,689 |
| C20ORF195 | -0,732 | HMHA1     | -0,689 |
| ANKRD49   | -0,732 | ZBTB5     | -0,689 |
| AKR1D1    | -0,732 | EVI2B     | -0,689 |
| TSPYL4    | -0,731 | TTC7B     | -0,686 |
| ABR       | -0,731 | MFSD11    | -0,686 |
| AP1G2     | -0,731 | SEC62     | -0,686 |
| CDAN1     | -0,731 | ANKRA2    | -0,686 |
| CCDC97    | -0,731 | FKTN      | -0,686 |
| GGA2      | -0,731 | MBD4      | -0,686 |
| LOC644935 | -0,729 | RPS15A    | -0,686 |
| FKTN      | -0,729 | SPPL2B    | -0,682 |
| AIRE      | -0,728 | ZNF688    | -0,682 |
| C7ORF23   | -0,728 | C16ORF74  | -0,682 |
| NAG18     | -0,726 | EEF1D     | -0,682 |
| RHBDL1    | -0,725 | BIN2      | -0,679 |
| CRYGS     | -0,725 | CLSTN2    | -0,679 |
| FAM39DP   | -0,725 | TRIM23    | -0,679 |
| LOC146517 | -0,725 | AMN1      | -0,679 |
| CD47      | -0,725 | ATMIN     | -0,679 |
| KIAA0240  | -0,725 | CHST14    | -0,679 |
| ZNF486    | -0,725 | CDK5RAP2  | -0,679 |
| SETX      | -0,723 | RALA      | -0,677 |
| OMA1      | -0,723 | LOC388532 | -0,676 |
| TCF3      | -0,722 | ATG9B     | -0,675 |
| ZNF235    | -0,720 | GABRD     | -0,675 |
| CHST14    | -0,719 | FLJ39639  | -0,675 |
| LARP5     | -0,718 | TMEM188   | -0,675 |
| KIAA0247  | -0,717 | DAPP1     | -0,675 |
| SLC15A4   | -0,717 | FALZ      | -0,671 |

|             |        |             |        |
|-------------|--------|-------------|--------|
| KLHL20      | -0,714 | LOC651309   | -0,671 |
| DPH4        | -0,714 | CRYZL1      | -0,671 |
| SYF2        | -0,714 | FAM89B      | -0,671 |
| RPS11       | -0,713 | LOC731640   | -0,671 |
| ZNF23       | -0,713 | ING4        | -0,668 |
| ANGEL2      | -0,713 | DCLRE1C     | -0,668 |
| IFT88       | -0,711 | NPHP3       | -0,668 |
| ZBTB5       | -0,711 | TRIM33      | -0,668 |
| STK4        | -0,711 | KIAA0182    | -0,668 |
| PFKFB2      | -0,710 | IL18        | -0,668 |
| NBPF3       | -0,710 | HOM-TES-103 | -0,664 |
| SSBP4       | -0,710 | P2RY10      | -0,664 |
| NKTR        | -0,710 | WDR22       | -0,661 |
| IL7         | -0,708 | RNPEPL1     | -0,661 |
| CTDSP1      | -0,708 | NBPF3       | -0,661 |
| B3GALT4     | -0,708 | SCYL1BP1    | -0,661 |
| TSPAN3      | -0,708 | NBPF11      | -0,661 |
| SMC1A       | -0,707 | OMA1        | -0,661 |
| ZNF230      | -0,707 | PFDN1       | -0,661 |
| TTC21A      | -0,707 | KIAA0256    | -0,661 |
| ZNF211      | -0,707 | ANKRD30B    | -0,661 |
| HECTD1      | -0,707 | CDO1        | -0,657 |
| ANKRD30B    | -0,707 | ATP10B      | -0,657 |
| LIN54       | -0,705 | RAB37       | -0,657 |
| LOC729446   | -0,705 | DDX60       | -0,657 |
| ALOX5       | -0,705 | AIRE        | -0,657 |
| ACD         | -0,705 | TRIM68      | -0,657 |
| CIAO1       | -0,705 | UPF2        | -0,657 |
| VEZF1       | -0,705 | PTPRCAP     | -0,657 |
| POGK        | -0,705 | RPS14       | -0,657 |
| CPNE5       | -0,704 | LOC652840   | -0,654 |
| PGBD2       | -0,704 | TTC29       | -0,654 |
| PUM1        | -0,704 | KCNA3       | -0,654 |
| ZNF821      | -0,702 | GPR87       | -0,654 |
| AMN1        | -0,702 | C6ORF78     | -0,654 |
| ZNF319      | -0,702 | LOC202181   | -0,654 |
| PIAS1       | -0,702 | CEP290      | -0,654 |
| ZNF549      | -0,702 | ZNF613      | -0,654 |
| SOBP        | -0,701 | FAM26F      | -0,654 |
| DKFZP586I14 | -0,701 | C17ORF44    | -0,654 |
| RBM33       | -0,701 | LOC90586    | -0,654 |
| MBD4        | -0,701 | ANKRD10     | -0,654 |
| TNK2        | -0,699 | TNFRSF13C   | -0,654 |
| KIAA0831    | -0,699 | C3ORF52     | -0,650 |

|             |        |           |        |
|-------------|--------|-----------|--------|
| RBM17       | -0,699 | PFKFB2    | -0,650 |
| BCL11A      | -0,698 | KBTBD7    | -0,650 |
| ZFP3        | -0,696 | NR2C1     | -0,650 |
| AGGF1       | -0,696 | VEZF1     | -0,650 |
| AASDH       | -0,696 | RPS11     | -0,649 |
| SNX1        | -0,695 | C1QB      | -0,646 |
| SEC14L1     | -0,695 | SOBP      | -0,646 |
| NCF4        | -0,695 | TRIM67    | -0,646 |
| RYK         | -0,695 | FLJ37396  | -0,646 |
| WASPIP      | -0,695 | LIPT1     | -0,646 |
| NASP        | -0,693 | DOPEY2    | -0,646 |
| DDX17       | -0,693 | KIAA1545  | -0,646 |
| LOC643031   | -0,693 | PIAS1     | -0,646 |
| ZNF540      | -0,692 | LOC285941 | -0,643 |
| CCDC14      | -0,692 | TLR4      | -0,643 |
| GDPD3       | -0,690 | REM2      | -0,643 |
| PHF12       | -0,690 | FUT6      | -0,643 |
| PUM2        | -0,690 | ZNF187    | -0,643 |
| TOP2B       | -0,690 | SEC14L1   | -0,643 |
| RPL38       | -0,689 | ADAM28    | -0,643 |
| ZNF137      | -0,689 | ALOX5     | -0,643 |
| LOC727762   | -0,689 | STXBP3    | -0,643 |
| CROP        | -0,689 | LAMA5     | -0,643 |
| EVI2B       | -0,689 | MAP3K1    | -0,642 |
| WDR19       | -0,689 | LOC653907 | -0,639 |
| C9ORF45     | -0,689 | C1ORF157  | -0,639 |
| COX19       | -0,688 | RHBDL1    | -0,639 |
| TARSL2      | -0,687 | R3HDM2    | -0,639 |
| LOC728565   | -0,687 | BEST4     | -0,639 |
| MED23       | -0,687 | WDR73     | -0,639 |
| MGC29891    | -0,687 | RNF13     | -0,639 |
| MYST3       | -0,687 | DYRK2     | -0,639 |
| MITD1       | -0,687 | MRFAP1L1  | -0,639 |
| EHD1        | -0,687 | BCL3      | -0,639 |
| DHRS12      | -0,686 | JMJD1B    | -0,639 |
| BICD2       | -0,686 | LOC730256 | -0,639 |
| PDE4B       | -0,686 | RBL2      | -0,639 |
| NBPF11      | -0,686 | LOC729900 | -0,636 |
| SETDB1      | -0,686 | C6ORF195  | -0,636 |
| GALNAC4S-6S | -0,686 | FSIP1     | -0,636 |
| MTX3        | -0,684 | ZNF512B   | -0,636 |
| SDCCAG3     | -0,684 | LOC54103  | -0,636 |
| ZBTB1       | -0,683 | FLJ20125  | -0,636 |
| FRAT1       | -0,683 | HYLS1     | -0,636 |

|           |        |           |        |
|-----------|--------|-----------|--------|
| LOC153561 | -0,683 | ATM       | -0,636 |
| DET1      | -0,683 | KIAA0892  | -0,636 |
| CCDC84    | -0,683 | LOC388621 | -0,636 |
| SGSM2     | -0,683 | LOC653658 | -0,633 |
| MRFAP1L1  | -0,681 | PROCA1    | -0,632 |
| STXBP3    | -0,681 | ZMAT1     | -0,632 |
| TNFRSF13C | -0,681 | ARHGAP27  | -0,632 |
| PDE4C     | -0,681 | PRSS3     | -0,632 |
| C20ORF72  | -0,681 | ZNF254    | -0,632 |
| LOC729603 | -0,680 | MGC24039  | -0,632 |
| DICER1    | -0,680 | LOC730994 | -0,632 |
| RNF38     | -0,680 | CYSLTR1   | -0,632 |
| ZMAT3     | -0,680 | SYS1      | -0,632 |
| TOMM7     | -0,680 | SEPW1     | -0,632 |
| LOC388969 | -0,678 | VPREB3    | -0,632 |
| ST3GAL5   | -0,678 | PIM1      | -0,632 |
| SLC16A12  | -0,678 | ELK3      | -0,629 |
| LOC729900 | -0,677 | PGCP      | -0,629 |
| ZNF107    | -0,677 | ZMYM1     | -0,629 |
| ZNF512B   | -0,677 | CCDC66    | -0,629 |
| TAGLN     | -0,677 | ULK1      | -0,629 |
| SH3GLB2   | -0,677 | NUAK2     | -0,629 |
| BBS2      | -0,675 | FRAT2     | -0,629 |
| GUCY2C    | -0,674 | IQGAP1    | -0,629 |
| POLR3GL   | -0,674 | ZBED5     | -0,629 |
| LOC652071 | -0,673 | ABCB11    | -0,625 |
| LOC728518 | -0,672 | RRM2      | -0,625 |
| CYP2E1    | -0,672 | THSD1P    | -0,625 |
| ZNF350    | -0,672 | ZNF420    | -0,625 |
| ODF2L     | -0,671 | C10ORF73  | -0,625 |
| RNPEPL1   | -0,671 | C5ORF25   | -0,625 |
| TRIM23    | -0,671 | ZNF235    | -0,625 |
| ZNF45     | -0,671 | PAQR8     | -0,625 |
| ADA       | -0,671 | SEPHS1    | -0,625 |
| SPSB3     | -0,671 | TCTN1     | -0,625 |
| LOC643509 | -0,671 | RSBN1     | -0,625 |
| PDCD7     | -0,671 | LSM14A    | -0,622 |
| LOC644222 | -0,669 | RPL38     | -0,622 |
| MBTPS1    | -0,669 | LOC646447 | -0,621 |
| FAM76B    | -0,669 | PAX5      | -0,621 |
| LYSMD2    | -0,669 | LOC653829 | -0,621 |
| SDHALP1   | -0,668 | RRM2B     | -0,621 |
| ARRDC2    | -0,668 | FAM116A   | -0,621 |
| SULT1A1   | -0,668 | CLK4      | -0,621 |

|           |        |           |        |
|-----------|--------|-----------|--------|
| FAM129C   | -0,668 | ACD       | -0,621 |
| LOC399900 | -0,667 | TMEM59    | -0,621 |
| KIAA0355  | -0,666 | LOC648622 | -0,621 |
| CREB1     | -0,666 | LOC653806 | -0,618 |
| ZNF33A    | -0,665 | C20ORF195 | -0,618 |
| R3HDM2    | -0,665 | PDE7A     | -0,618 |
| PGM2L1    | -0,665 | CMIP      | -0,618 |
| 6/sep     | -0,665 | FAM98C    | -0,618 |
| PDE7B     | -0,665 | SFRS2IP   | -0,618 |
| EVI5      | -0,665 | HERC6     | -0,618 |
| NUAK2     | -0,665 | GTF2IRD2B | -0,618 |
| SYS1      | -0,665 | NAE1      | -0,618 |
| PNPLA7    | -0,665 | CREB1     | -0,618 |
| LOC401152 | -0,665 | ZNF486    | -0,618 |
| BEST4     | -0,663 | LOC645138 | -0,618 |
| MFSD11    | -0,663 | LOC650822 | -0,614 |
| C14ORF102 | -0,663 | LOC728032 | -0,614 |
| SIAH1     | -0,663 | LOC732425 | -0,614 |
| TCFL5     | -0,663 | LOC90925  | -0,614 |
| C1ORF66   | -0,663 | CDC25B    | -0,614 |
| LRDD      | -0,662 | AGGF1     | -0,614 |
| ZNF225    | -0,662 | IFT57     | -0,614 |
| ELF2      | -0,662 | PRICKLE1  | -0,614 |
| PYHIN1    | -0,662 | AES       | -0,614 |
| SAMD9     | -0,662 | C5ORF29   | -0,614 |
| SRRM2     | -0,662 | GVIN1     | -0,614 |
| GNPTG     | -0,660 | MTPN      | -0,614 |
| LOC642701 | -0,660 | TOMM7     | -0,614 |
| ZNF425    | -0,660 | LOC643809 | -0,611 |
| LOC54103  | -0,660 | BFSP2     | -0,611 |
| MLL5      | -0,660 | CNOT8     | -0,611 |
| LOC90586  | -0,660 | C3ORF19   | -0,611 |
| IGBP1     | -0,660 | SLC15A4   | -0,611 |
| ROCK2     | -0,660 | LOC644411 | -0,607 |
| SPOCK2    | -0,660 | OR11H12   | -0,607 |
| ALS2CR16  | -0,659 | ZNF425    | -0,607 |
| CLK2      | -0,659 | TLR1      | -0,607 |
| ST3GAL1   | -0,659 | TNFSF10   | -0,607 |
| ZNF329    | -0,659 | CECR1     | -0,607 |
| RGL2      | -0,657 | ACAA2     | -0,607 |
| C1ORF186  | -0,657 | EVI5      | -0,607 |
| CLK4      | -0,657 | HHEX      | -0,607 |
| HYPK      | -0,657 | RYK       | -0,607 |
| CTGLF3    | -0,657 | HBXIP     | -0,607 |

|           |        |           |        |
|-----------|--------|-----------|--------|
| ZNF395    | -0,657 | ZNF518B   | -0,607 |
| GAB3      | -0,656 | ZNF69     | -0,607 |
| IFFO      | -0,656 | USP24     | -0,607 |
| ZNF33B    | -0,656 | CD79A     | -0,607 |
| ABLIM1    | -0,656 | MITD1     | -0,607 |
| EIF3F     | -0,655 | RPL17     | -0,607 |
| LOC646144 | -0,654 | GARNL4    | -0,604 |
| C1ORF220  | -0,654 | CENPQ     | -0,604 |
| CHD6      | -0,654 | ZNF821    | -0,604 |
| SMA4      | -0,654 | TULP4     | -0,604 |
| NCOA1     | -0,654 | TRAK1     | -0,604 |
| SLC25A28  | -0,654 | C9ORF103  | -0,604 |
| DBF4B     | -0,653 | ZNF671    | -0,604 |
| TAF1L     | -0,653 | SNRPN     | -0,604 |
| TRIM38    | -0,653 | KIAA1267  | -0,604 |
| ZNF318    | -0,653 | CYBA      | -0,604 |
| CEP110    | -0,653 | C6ORF151  | -0,601 |
| C19ORF22  | -0,652 | RAB27B    | -0,600 |
| ARMC2     | -0,651 | ZBED2     | -0,600 |
| C11ORF61  | -0,651 | MPP3      | -0,600 |
| TGIF1     | -0,651 | RAB11FIP4 | -0,600 |
| LIPT1     | -0,651 | LOC644117 | -0,600 |
| ERMN      | -0,650 | FMNL3     | -0,600 |
| DACT1     | -0,650 | SULT1A4   | -0,600 |
| SKP2      | -0,650 | PDCD6IP   | -0,600 |
| C21ORF24  | -0,650 | LOC653489 | -0,600 |
| CBX7      | -0,650 | RERE      | -0,600 |
| LOC400721 | -0,650 | ZNF154    | -0,600 |
| ADAMTS6   | -0,648 | TP53RK    | -0,600 |
| OCIAD1    | -0,648 | RAB3IP    | -0,600 |
| CSAD      | -0,647 | ZNF549    | -0,600 |
| AMT       | -0,647 | ZMAT3     | -0,600 |
| SLC9A9    | -0,647 | MKLN1     | -0,600 |
| AK1       | -0,647 | TRIM22    | -0,600 |
| DCLRE1C   | -0,647 | LOC649557 | -0,596 |
| SNRPN     | -0,647 | CSNK1A1L  | -0,596 |
| QSOX2     | -0,647 | NGFRAP1   | -0,596 |
| SHISA5    | -0,647 | C1ORF120  | -0,596 |
| MORC3     | -0,646 | ANXA2P3   | -0,596 |
| PCMTD1    | -0,645 | C1ORF220  | -0,596 |
| ARHGAP27  | -0,645 | ZNF57     | -0,596 |
| SDHAP3    | -0,645 | TUBD1     | -0,596 |
| IL12A     | -0,645 | WHDC1     | -0,596 |
| NPIP      | -0,645 | ARHGAP12  | -0,596 |



|           |        |           |        |
|-----------|--------|-----------|--------|
| LOC654103 | -0,645 | C1ORF83   | -0,596 |
| SLC25A35  | -0,644 | ZNF350    | -0,596 |
| C4ORF41   | -0,644 | IFIT2     | -0,596 |
| ADD1      | -0,644 | MTIF3     | -0,596 |
| RBM5      | -0,644 | YPEL3     | -0,596 |
| BBS1      | -0,642 | KLF13     | -0,596 |
| ZNF302    | -0,642 | SELL      | -0,596 |
| POLM      | -0,642 | EPSTI1    | -0,596 |
| LRCH4     | -0,642 | C4ORF34   | -0,596 |
| TAF3      | -0,641 | OR3A2     | -0,593 |
| CMAH      | -0,641 | ST8SIA4   | -0,593 |
| PHACS     | -0,641 | 1/mrt     | -0,593 |
| ZNF133    | -0,641 | FCGR2B    | -0,593 |
| GPX1      | -0,641 | RCSD1     | -0,593 |
| YPEL5     | -0,641 | LRRFIP1   | -0,593 |
| LOC643977 | -0,639 | IK        | -0,593 |
| BRD8      | -0,639 | SLC25A28  | -0,593 |
| NUB1      | -0,639 | YPEL5     | -0,593 |
| C5ORF39   | -0,639 | AQP12A    | -0,589 |
| KLF13     | -0,639 | SLFN12    | -0,589 |
| KIAA2026  | -0,638 | ZNRF2     | -0,589 |
| DDX60     | -0,638 | TTC21A    | -0,589 |
| NIP30     | -0,638 | ZNF250    | -0,589 |
| GOLGA8B   | -0,638 | CBL       | -0,589 |
| GTF2IRD2P | -0,636 | NIP30     | -0,589 |
| NLRP1     | -0,636 | ZSCAN16   | -0,589 |
| MZF1      | -0,636 | C21ORF24  | -0,589 |
| PIM1      | -0,636 | CDKN1B    | -0,589 |
| KIAA0430  | -0,636 | EHD1      | -0,589 |
| LAPTM5    | -0,636 | TRABD     | -0,589 |
| FARSLB    | -0,636 | RPL15     | -0,589 |
| PRDM2     | -0,635 | RPS27A    | -0,589 |
| SLC6A16   | -0,635 | LOC643284 | -0,589 |
| MS4A1     | -0,635 | PRSS2     | -0,586 |
| YTHDC1    | -0,635 | ITGA9     | -0,586 |
| SNURF     | -0,635 | FADS6     | -0,586 |
| SETD2     | -0,635 | OR2B2     | -0,586 |
| LOC644033 | -0,635 | KLHDC9    | -0,586 |
| RNF166    | -0,633 | RAB12     | -0,586 |
| KLRA1     | -0,633 | MNDA      | -0,586 |
| CAPS      | -0,633 | CIAO1     | -0,586 |
| PLEKHA2   | -0,633 | TMEM77    | -0,586 |
| ADNP      | -0,633 | TM9SF2    | -0,586 |
| CD46      | -0,633 | HSD17B7   | -0,586 |

|           |        |           |        |
|-----------|--------|-----------|--------|
| ZNF337    | -0,633 | LAPTM5    | -0,586 |
| IFNGR2    | -0,633 | PA2G4P4   | -0,582 |
| LSM14A    | -0,633 | LOC647928 | -0,582 |
| ITIH5     | -0,632 | LOC650657 | -0,582 |
| ASTE1     | -0,632 | SH3BGR    | -0,582 |
| CCDC106   | -0,632 | ZNF335    | -0,582 |
| DMAP1     | -0,632 | MED11     | -0,582 |
| TTC31     | -0,632 | LOC647346 | -0,582 |
| VPREB3    | -0,632 | C4ORF41   | -0,582 |
| CRKL      | -0,632 | C5ORF5    | -0,582 |
| DAG1      | -0,630 | FGF11     | -0,579 |
| VPS8      | -0,630 | LOC652663 | -0,579 |
| F8A1      | -0,630 | LOC138652 | -0,579 |
| DPEP2     | -0,630 | LOC286467 | -0,579 |
| LOC400890 | -0,630 | ZNF436    | -0,579 |
| LYN       | -0,630 | ARHGAP11B | -0,579 |
| FRAT2     | -0,629 | PROK2     | -0,579 |
| SFRS14    | -0,629 | LOC729837 | -0,579 |
| FOXJ3     | -0,629 | ZNF230    | -0,579 |
| FAM39E    | -0,627 | IL16      | -0,579 |
| BIN3      | -0,627 | EBAG9     | -0,579 |
| C11ORF35  | -0,627 | SELO      | -0,579 |
| CENPJ     | -0,627 | SLC44A2   | -0,579 |
| BTN2A1    | -0,627 | CD37      | -0,579 |
| ZNF217    | -0,627 | C14ORF85  | -0,579 |
| TGOLN2    | -0,627 | LOC653867 | -0,575 |
| TXNDC16   | -0,626 | LOC644090 | -0,575 |
| TBC1D23   | -0,626 | DEGS2     | -0,575 |
| AFG3L1    | -0,626 | LOC643977 | -0,575 |
| DOPEY1    | -0,626 | TLR6      | -0,575 |
| FAM98C    | -0,626 | PLEKHG1   | -0,575 |
| SYNJ2BP   | -0,626 | C14ORF102 | -0,575 |
| ZSCAN18   | -0,626 | LOC440704 | -0,575 |
| C9ORF38   | -0,624 | TXNIP     | -0,575 |
| S100PBP   | -0,624 | LOC651635 | -0,571 |
| GSDML     | -0,624 | LOC730809 | -0,571 |
| TOP1MT    | -0,624 | DZIP1L    | -0,571 |
| C14ORF24  | -0,624 | LOC441120 | -0,571 |
| GVIN1     | -0,624 | FOXD2     | -0,571 |
| MX2       | -0,624 | ZNF510    | -0,571 |
| LOC728481 | -0,624 | SMA4      | -0,571 |
| ARL2BP    | -0,624 | KIAA1683  | -0,571 |
| RAB26     | -0,623 | ABHD3     | -0,571 |
| GNRH1     | -0,623 | PYHIN1    | -0,571 |

|            |        |             |        |
|------------|--------|-------------|--------|
| GUSBL1     | -0,623 | PIK3IP1     | -0,571 |
| C14ORF28   | -0,623 | GALNAC4S-6S | -0,571 |
| SNRP70     | -0,623 | AKR1D1      | -0,571 |
| MYD88      | -0,623 | C20ORF111   | -0,571 |
| CDKN2AIPNL | -0,623 | EIF3F       | -0,571 |
| THAP11     | -0,623 | LOC728956   | -0,568 |
| LOC653081  | -0,621 | FCGR3A      | -0,568 |
| ZNF187     | -0,621 | C9ORF109    | -0,568 |
| RNF216     | -0,621 | LOC652887   | -0,568 |
| UPF2       | -0,621 | PTCD3       | -0,568 |
| PNN        | -0,621 | MTERFD2     | -0,568 |
| ZNF514     | -0,620 | TBC1D1      | -0,568 |
| C20ORF107  | -0,620 | LENG1       | -0,568 |
| AHSA2      | -0,620 | FRAT1       | -0,568 |
| ZMYM4      | -0,620 | CNNM4       | -0,568 |
| C6ORF111   | -0,620 | DPP8        | -0,568 |
| AGBL5      | -0,618 | KIAA1407    | -0,568 |
| TGFBI      | -0,618 | RNF38       | -0,568 |
| GLOD4      | -0,618 | CDAN1       | -0,568 |
| EVL        | -0,618 | NUB1        | -0,568 |
| RAB12      | -0,617 | ITM2B       | -0,568 |
| KMO        | -0,617 | C6ORF192    | -0,568 |
| BCOR       | -0,617 | SSH2        | -0,568 |
| ABTB1      | -0,617 | ZNF107      | -0,564 |
| PGS1       | -0,617 | CRABP1      | -0,564 |
| AES        | -0,617 | FGF20       | -0,564 |
| ZBED5      | -0,617 | ALOX15      | -0,564 |
| NISCH      | -0,617 | PCDH9       | -0,564 |
| LRAP       | -0,617 | CNTN6       | -0,564 |
| PLA2G4B    | -0,616 | KLRA1       | -0,564 |
| HESX1      | -0,615 | FLJ20489    | -0,564 |
| LOC654335  | -0,615 | CCBE1       | -0,564 |
| MIA3       | -0,615 | ZNF175      | -0,564 |
| FLJ39653   | -0,615 | SDCCAG3     | -0,564 |
| NADK       | -0,615 | STAT5B      | -0,564 |
| RAB11FIP2  | -0,615 | PRDM8       | -0,564 |
| BRWD2      | -0,615 | AASDH       | -0,564 |
| KIAA0256   | -0,615 | ZNF545      | -0,564 |
| C11ORF47   | -0,614 | 15/sep      | -0,564 |
| CCDC100    | -0,614 | LOC642277   | -0,561 |
| PCBD2      | -0,614 | PLXDC2      | -0,561 |
| TLR6       | -0,614 | C8ORF30A    | -0,561 |
| GNG7       | -0,614 | LOC644944   | -0,561 |
| BAGE5      | -0,612 | CASC5       | -0,561 |

|           |        |             |        |
|-----------|--------|-------------|--------|
| FMNL3     | -0,612 | LOC653197   | -0,561 |
| NBPF14    | -0,612 | DKFZP686E24 | -0,561 |
| ZNF451    | -0,612 | LOC644642   | -0,561 |
| CBX4      | -0,612 | XRCC1       | -0,561 |
| VAMP1     | -0,612 | ZNF32       | -0,561 |
| ATMIN     | -0,612 | ZNF791      | -0,561 |
| EPM2AIP1  | -0,612 | MED23       | -0,561 |
| LRWD1     | -0,612 | C1ORF63     | -0,561 |
| TMEM77    | -0,612 | ZCCHC11     | -0,561 |
| CHMP1B    | -0,612 | HSPC268     | -0,561 |
| LOC144983 | -0,611 | RGS19       | -0,561 |
| LZTS2     | -0,611 | SHCBP1      | -0,561 |
| BCL3      | -0,611 | SLC7A7      | -0,561 |
| WDR5B     | -0,609 | ELOVL5      | -0,561 |
| PGCP      | -0,609 | PUM2        | -0,561 |
| ASCC3L1   | -0,609 | DUSP19      | -0,561 |
| SEC62     | -0,609 | OR4K15      | -0,557 |
| SCARB2    | -0,609 | CDH1        | -0,557 |
| PCMTD2    | -0,609 | FLJ11235    | -0,557 |
| C5ORF41   | -0,609 | CSNK1G1     | -0,557 |
| ANAPC4    | -0,609 | KLHL20      | -0,557 |
| NMT2      | -0,608 | PURA        | -0,557 |
| TMEM80    | -0,608 | CNN2        | -0,557 |
| PDE7A     | -0,608 | TRMT12      | -0,557 |
| ULK1      | -0,608 | AHR         | -0,557 |
| LIG1      | -0,608 | GGA2        | -0,557 |
| KIAA0182  | -0,608 | LOC130773   | -0,554 |
| PRKCE     | -0,608 | LOC340113   | -0,554 |
| ZFYVE20   | -0,608 | LOC647802   | -0,554 |
| SSH2      | -0,608 | FSTL3       | -0,554 |
| RAB37     | -0,606 | TBC1D23     | -0,554 |
| FLT3LG    | -0,606 | CRK         | -0,554 |
| ARHGAP12  | -0,606 | C17ORF48    | -0,554 |
| SETD1B    | -0,606 | BBS4        | -0,554 |
| HERC6     | -0,606 | HBP1        | -0,554 |
| CD5       | -0,606 | RIPK1       | -0,554 |
| OVGP1     | -0,606 | RAD21       | -0,554 |
| PRICKLE1  | -0,606 | SLC16A12    | -0,554 |
| ZNF439    | -0,606 | SF3A3       | -0,554 |
| ST6GAL1   | -0,606 | PDCD7       | -0,554 |
| LPP       | -0,606 | KIAA0430    | -0,554 |
| TXLNB     | -0,605 | RPL13A      | -0,554 |
| TRPC6     | -0,605 | CFL2        | -0,550 |
| FXYD7     | -0,605 | LOC650938   | -0,550 |

|           |        |           |        |
|-----------|--------|-----------|--------|
| TBC1D1    | -0,605 | CLDN22    | -0,550 |
| NR2C1     | -0,605 | CRCT1     | -0,550 |
| FCGRT     | -0,605 | SLC44A5   | -0,550 |
| ZBTB24    | -0,605 | TAS2R39   | -0,550 |
| MGC16703  | -0,605 | LOC338750 | -0,550 |
| CAMK1D    | -0,603 | CNP       | -0,550 |
| COL9A3    | -0,603 | HNRNP2    | -0,550 |
| CALCOCO1  | -0,603 | MGC16075  | -0,550 |
| BBS4      | -0,603 | ZNF239    | -0,550 |
| TPMT      | -0,603 | KIAA2026  | -0,550 |
| NAGPA     | -0,603 | C3ORF58   | -0,550 |
| TAF4      | -0,603 | AGTPBP1   | -0,550 |
| IK        | -0,603 | METTL7A   | -0,550 |
| TOR1AIP1  | -0,603 | TCF3      | -0,550 |
| C1ORF152  | -0,602 | PARP12    | -0,550 |
| ANKRD26   | -0,602 | PDSS2     | -0,550 |
| IKBKB     | -0,602 | C8ORF59   | -0,550 |
| PITPNM1   | -0,602 | RGL2      | -0,547 |
| MAN1C1    | -0,600 | LOC653081 | -0,546 |
| INADL     | -0,600 | ZNF280B   | -0,546 |
| WBSR18    | -0,600 | RNF166    | -0,546 |
| HKR1      | -0,600 | LBR       | -0,546 |
| NEK8      | -0,600 | LOC153561 | -0,546 |
| CNP       | -0,598 | CTDSP1    | -0,546 |
| FANCF     | -0,598 | FCHO1     | -0,546 |
| TUBD1     | -0,598 | SETX      | -0,546 |
| C6ORF136  | -0,598 | PRUNE     | -0,546 |
| AKT1      | -0,598 | TDRD7     | -0,546 |
| RHBDD2    | -0,598 | CCDC97    | -0,546 |
| LOC440704 | -0,598 | CTCF      | -0,546 |
| PHF15     | -0,598 | KIAA0355  | -0,546 |
| FAM55C    | -0,597 | PAN3      | -0,546 |
| LOC441124 | -0,597 | CHMP1B    | -0,546 |
| CASD1     | -0,597 | C12ORF47  | -0,546 |
| KRIT1     | -0,597 | GLTSCR2   | -0,546 |
| LOC197135 | -0,597 | LOC222967 | -0,543 |
| FLJ11286  | -0,597 | ZNF385A   | -0,543 |
| CTCF      | -0,597 | LOC347364 | -0,543 |
| LOC731985 | -0,596 | MBD5      | -0,543 |
| KLHL24    | -0,595 | LOC644421 | -0,543 |
| ANKRD12   | -0,595 | MGC27165  | -0,543 |
| DEGS2     | -0,594 | ARL4C     | -0,543 |
| ZNF280B   | -0,594 | KBTBD3    | -0,543 |
| LOC153684 | -0,594 | WDR23     | -0,543 |

|           |        |           |        |
|-----------|--------|-----------|--------|
| ZNF517    | -0,594 | USP33     | -0,543 |
| MSL3L1    | -0,594 | PARD6A    | -0,543 |
| YY1AP1    | -0,594 | SETD1B    | -0,543 |
| LOC221442 | -0,594 | PHF20     | -0,543 |
| DUSP18    | -0,594 | ARID4B    | -0,543 |
| CDC25B    | -0,594 | ZNF266    | -0,543 |
| C8ORF37   | -0,594 | FAM45A    | -0,543 |
| RPL15     | -0,593 | SNX10     | -0,543 |
| SART1     | -0,592 | CTSS      | -0,543 |
| ZNF500    | -0,592 | PVRIG     | -0,543 |
| ZNF34     | -0,592 | ZFP90     | -0,543 |
| C20ORF191 | -0,592 | KIAA0240  | -0,543 |
| CNPY3     | -0,592 | PDLIM1    | -0,543 |
| MYO9B     | -0,592 | C20ORF72  | -0,543 |
| TMEM17    | -0,592 | TOP2B     | -0,543 |
| LOC729843 | -0,592 | EIF3EIP   | -0,543 |
| SUMO3     | -0,592 | FLJ12334  | -0,539 |
| EIF4A2    | -0,591 | LOC646552 | -0,539 |
| HAL       | -0,591 | ZNF596    | -0,539 |
| SULT1A2   | -0,591 | C17ORF67  | -0,539 |
| NDC80     | -0,591 | LOC653093 | -0,539 |
| STX16     | -0,591 | LOC646573 | -0,539 |
| HSD17B7   | -0,591 | RAB23     | -0,539 |
| RBM22     | -0,591 | LOC728519 | -0,539 |
| RNF32     | -0,589 | LOC648059 | -0,539 |
| CCDC146   | -0,589 | KMO       | -0,539 |
| FAM117A   | -0,589 | GSDML     | -0,539 |
| TTC32     | -0,589 | TIFA      | -0,539 |
| KIAA0323  | -0,589 | TGFBI     | -0,539 |
| HSPC268   | -0,589 | DMAP1     | -0,539 |
| PRIC285   | -0,589 | ZNF430    | -0,539 |
| DNMT1     | -0,589 | RAB31     | -0,539 |
| LOC645895 | -0,589 | SERTAD2   | -0,536 |
| ARGLU1    | -0,589 | RASSF3    | -0,536 |
| TMEM86B   | -0,588 | LOC390378 | -0,536 |
| SNHG11    | -0,588 | LOC647003 | -0,536 |
| XRCC1     | -0,588 | LOC643665 | -0,536 |
| SCYL1BP1  | -0,588 | B4GALT2   | -0,536 |
| SLFN11    | -0,588 | BAGE5     | -0,536 |
| IRS2      | -0,588 | NR1D2     | -0,536 |
| SYPL1     | -0,588 | FOXO4     | -0,536 |
| ZNF615    | -0,588 | NR3C2     | -0,536 |
| RABGAP1   | -0,588 | SLC25A20  | -0,536 |
| CXCR5     | -0,588 | BRD8      | -0,536 |

|             |        |           |        |
|-------------|--------|-----------|--------|
| EP300       | -0,586 | SKP2      | -0,536 |
| ITCH        | -0,586 | GOLGA7    | -0,536 |
| USP24       | -0,586 | SSTR2     | -0,536 |
| CCDC130     | -0,586 | PDE4B     | -0,536 |
| LOC644391   | -0,585 | RALGPS1   | -0,536 |
| LOC652726   | -0,585 | MYO9B     | -0,536 |
| ZNF224      | -0,585 | TMEM17    | -0,536 |
| LOC651309   | -0,585 | ZNF721    | -0,536 |
| PLEKHG1     | -0,585 | KIAA0494  | -0,536 |
| AKAP11      | -0,585 | LRAP      | -0,536 |
| RNASET2     | -0,584 | LOC654114 | -0,532 |
| LOC653080   | -0,583 | GPM6B     | -0,532 |
| C16ORF74    | -0,583 | LOC652076 | -0,532 |
| KIAA1407    | -0,583 | FXD7      | -0,532 |
| AGXT2L2     | -0,583 | CLOCK     | -0,532 |
| LOC645522   | -0,582 | SLC39A10  | -0,532 |
| RUNDC2A     | -0,582 | WDFY2     | -0,532 |
| C20ORF12    | -0,582 | ZBTB34    | -0,532 |
| LRIG1       | -0,582 | LOC728565 | -0,532 |
| RUFY1       | -0,582 | ZBP1      | -0,532 |
| KIAA1128    | -0,582 | AFF3      | -0,532 |
| SLC44A4     | -0,582 | CEP135    | -0,532 |
| ZNF430      | -0,582 | SESN1     | -0,532 |
| PDCD4       | -0,582 | GCA       | -0,532 |
| TBL1X       | -0,582 | CSNK1G2   | -0,532 |
| DKFZP686E24 | -0,580 | ISG20     | -0,532 |
| TLR1        | -0,580 | OR52E5    | -0,529 |
| SNTB2       | -0,580 | SPIN2A    | -0,529 |
| SMAD5       | -0,580 | BHLHB8    | -0,529 |
| BRPF3       | -0,580 | CENPC1    | -0,529 |
| TXNDC13     | -0,580 | LOC642574 | -0,529 |
| CCNDBP1     | -0,580 | MDM1      | -0,529 |
| TRRAP       | -0,580 | FAM55C    | -0,529 |
| BFSP2       | -0,579 | HDAC5     | -0,529 |
| ZNF320      | -0,579 | F11R      | -0,529 |
| POMT2       | -0,579 | SELP      | -0,529 |
| FAM104B     | -0,579 | ZNF136    | -0,529 |
| GGA1        | -0,579 | ZBTB39    | -0,529 |
| CENTB2      | -0,579 | C17ORF39  | -0,529 |
| ZYG11B      | -0,579 | GON4L     | -0,529 |
| C14ORF85    | -0,579 | C7ORF36   | -0,529 |
| IRF9        | -0,579 | PPM1K     | -0,529 |
| HEY1        | -0,577 | BLCAP     | -0,529 |
| ZNF229      | -0,577 | KIAA1370  | -0,529 |

|           |        |           |        |
|-----------|--------|-----------|--------|
| GKAP1     | -0,577 | LOC146517 | -0,529 |
| OSBPL7    | -0,577 | LOC648852 | -0,529 |
| ZNF791    | -0,577 | DPEP2     | -0,529 |
| SMCHD1    | -0,577 | CDC40     | -0,529 |
| RUNDC1    | -0,577 | LOC642333 | -0,529 |
| C3ORF19   | -0,577 | RP9       | -0,525 |
| RAB2B     | -0,577 | ATP5O     | -0,525 |
| PCID2     | -0,577 | TXLNB     | -0,525 |
| LOC728519 | -0,576 | DMXL2     | -0,525 |
| C1ORF83   | -0,576 | OR4N5     | -0,525 |
| SIGLEC10  | -0,576 | SPESP1    | -0,525 |
| TBCC      | -0,576 | LOC642423 | -0,525 |
| LOC728499 | -0,576 | ZNF592    | -0,525 |
| RSBN1     | -0,576 | FLJ14213  | -0,525 |
| TMEM149   | -0,576 | CYP2E1    | -0,525 |
| NUF2      | -0,574 | EFHC1     | -0,525 |
| CLDN15    | -0,574 | CASD1     | -0,525 |
| PPP2R5B   | -0,574 | ZFP3      | -0,525 |
| LUC7L     | -0,574 | BRDG1     | -0,525 |
| CUTL1     | -0,574 | COX19     | -0,525 |
| LOC653778 | -0,574 | EID2B     | -0,525 |
| ZNF69     | -0,574 | PCMTD2    | -0,525 |
| CDC40     | -0,574 | CBX7      | -0,525 |
| PDLIM1    | -0,574 | VPS4B     | -0,525 |
| LOC441087 | -0,574 | KRTAP19-4 | -0,521 |
| FAM155A   | -0,573 | AMBRA1    | -0,521 |
| PPM1A     | -0,573 | LOC649030 | -0,521 |
| RAI16     | -0,573 | FLJ35934  | -0,521 |
| C10ORF73  | -0,573 | NXF3      | -0,521 |
| TAF1C     | -0,573 | PIK3R5    | -0,521 |
| SMG1      | -0,573 | IL7       | -0,521 |
| DHRS1     | -0,573 | TAGLN     | -0,521 |
| ZFP36L2   | -0,573 | RBBP9     | -0,521 |
| LOC730744 | -0,573 | SULT1A1   | -0,521 |
| HSBP1     | -0,572 | ZNF45     | -0,521 |
| C1ORF132  | -0,571 | C1ORF186  | -0,521 |
| FLJ10404  | -0,571 | RTP4      | -0,521 |
| SPG7      | -0,571 | WBP1      | -0,521 |
| CCDC101   | -0,571 | CNOT7     | -0,521 |
| CRAMP1L   | -0,571 | HIVEP1    | -0,521 |
| ZNF652    | -0,571 | ZFP36L2   | -0,521 |
| RCSD1     | -0,571 | CCNDBP1   | -0,521 |
| HVCN1     | -0,571 | SNORD16   | -0,521 |
| C17ORF62  | -0,571 | XPC       | -0,521 |



|           |        |            |        |
|-----------|--------|------------|--------|
| DUSP19    | -0,571 | PPP1CC     | -0,521 |
| LEAP-2    | -0,570 | EIF4A2     | -0,518 |
| LOC554206 | -0,570 | ASAH3L     | -0,518 |
| RFFL      | -0,570 | DAGLA      | -0,518 |
| LOC649864 | -0,570 | C8ORF74    | -0,518 |
| SEPN1     | -0,570 | WFDC5      | -0,518 |
| PPAPDC2   | -0,570 | CDR2L      | -0,518 |
| APPL2     | -0,570 | KIAA1984   | -0,518 |
| EID2B     | -0,570 | C11ORF77   | -0,518 |
| HNRPDL    | -0,570 | LOC649456  | -0,518 |
| ASB12     | -0,568 | TARSL2     | -0,518 |
| MAPKBP1   | -0,568 | UBE3B      | -0,518 |
| BAIAP3    | -0,568 | MS4A1      | -0,518 |
| DEPDC5    | -0,568 | CEP192     | -0,518 |
| FLJ35220  | -0,568 | TM2D2      | -0,518 |
| GALC      | -0,568 | PSIP1      | -0,518 |
| CABIN1    | -0,568 | ATG5       | -0,518 |
| POFUT1    | -0,568 | SYNJ2BP    | -0,518 |
| SLC46A3   | -0,568 | CHRNA5     | -0,518 |
| ARID3B    | -0,568 | TBCC       | -0,518 |
| YPEL2     | -0,568 | KLHL22     | -0,518 |
| PTPRCAP   | -0,568 | TMEM134    | -0,518 |
| LOC728032 | -0,567 | DEDD2      | -0,518 |
| F11R      | -0,567 | ZBTB24     | -0,518 |
| RG9MTD3   | -0,567 | LOC441087  | -0,518 |
| KIAA0556  | -0,567 | RPS10      | -0,517 |
| LOC286208 | -0,567 | LOC730919  | -0,514 |
| WWC3      | -0,567 | ELOVL2     | -0,514 |
| C7ORF26   | -0,567 | CRSP2      | -0,514 |
| BAT2D1    | -0,566 | LOC644852  | -0,514 |
| LOC642995 | -0,565 | BNIP1      | -0,514 |
| MBD5      | -0,565 | RPL23AP13  | -0,514 |
| MAN2A2    | -0,565 | DACT1      | -0,514 |
| ZNF550    | -0,565 | CCDC102A   | -0,514 |
| C20ORF67  | -0,565 | SPG3A      | -0,514 |
| RAD21     | -0,565 | LOC339804  | -0,514 |
| AKAP8     | -0,565 | LYST       | -0,514 |
| TMED4     | -0,565 | DOPEY1     | -0,514 |
| CYFIP2    | -0,565 | NASP       | -0,514 |
| LOC51035  | -0,565 | ADAM8      | -0,514 |
| ALKBH5    | -0,565 | LOC26010   | -0,514 |
| NIPSNAP3B | -0,564 | SIAH1      | -0,514 |
| BRWD3     | -0,564 | CD47       | -0,514 |
| LOC285908 | -0,564 | CDKN2AIPNL | -0,514 |

|           |        |           |        |
|-----------|--------|-----------|--------|
| GOLGA1    | -0,564 | RPL22     | -0,514 |
| SIN3B     | -0,564 | RPS27     | -0,514 |
| PRKD2     | -0,564 | LOC650005 | -0,511 |
| LOC729559 | -0,564 | GPR174    | -0,511 |
| ZNF641    | -0,564 | LOC646134 | -0,511 |
| TTC3      | -0,564 | COL1A2    | -0,511 |
| IFIT2     | -0,564 | COX11P    | -0,511 |
| DEDD2     | -0,564 | CITED4    | -0,511 |
| ZNF512    | -0,564 | WDR86     | -0,511 |
| ZNF510    | -0,562 | GPA33     | -0,511 |
| LOC90379  | -0,562 | EPB41L3   | -0,511 |
| BMF       | -0,562 | ZNF443    | -0,511 |
| CCBE1     | -0,562 | C11ORF61  | -0,511 |
| LIN7B     | -0,562 | PBXIP1    | -0,511 |
| NHLRC3    | -0,562 | LOC651957 | -0,511 |
| RIPK1     | -0,562 | BICD2     | -0,511 |
| PPWD1     | -0,562 | CREBBP    | -0,511 |
| P2RY10    | -0,562 | ALPP      | -0,511 |
| TRIM22    | -0,562 | ICAM3     | -0,511 |
| LOC389671 | -0,561 | LOC646003 | -0,507 |
| OMG       | -0,561 | LOC642616 | -0,507 |
| C3ORF42   | -0,561 | LOC651695 | -0,507 |
| LOC732425 | -0,561 | KIF27     | -0,507 |
| ASB6      | -0,561 | ALX3      | -0,507 |
| MST1      | -0,561 | LOC388327 | -0,507 |
| KIAA0460  | -0,561 | LOC653878 | -0,507 |
| C3ORF63   | -0,561 | VNN1      | -0,507 |
| SLC9A8    | -0,561 | CCDC122   | -0,507 |
| GPR18     | -0,561 | TSPYL4    | -0,507 |
| PPP3CC    | -0,561 | LOC729196 | -0,507 |
| C18ORF8   | -0,561 | CNR1      | -0,507 |
| LOC653197 | -0,559 | PWWP2B    | -0,507 |
| LOC91664  | -0,559 | C17ORF56  | -0,507 |
| DMWD      | -0,559 | PDE7B     | -0,507 |
| ELAVL1    | -0,559 | USP47     | -0,507 |
| FLJ46309  | -0,559 | GPR132    | -0,507 |
| SIN3A     | -0,559 | PXMP3     | -0,507 |
| MAP3K1    | -0,559 | DPH4      | -0,507 |
| BSN       | -0,558 | FLJ46309  | -0,507 |
| ZNF321    | -0,558 | KIAA0247  | -0,507 |
| SBK1      | -0,558 | CWF19L2   | -0,507 |
| ATP2A3    | -0,558 | SP110     | -0,507 |
| ZNF559    | -0,558 | FAM104A   | -0,507 |
| HSPBAP1   | -0,558 | TEAD2     | -0,507 |

|             |        |           |        |
|-------------|--------|-----------|--------|
| ZNF700      | -0,558 | CCDC109B  | -0,507 |
| PHF3        | -0,558 | TINP1     | -0,507 |
| TP53I13     | -0,558 | RPS29     | -0,507 |
| RN7SL1      | -0,558 | HRH1      | -0,504 |
| LGI4        | -0,556 | LOC388080 | -0,504 |
| HOM-TES-103 | -0,556 | LOC731895 | -0,504 |
| GUCA1B      | -0,556 | FAM114A1  | -0,504 |
| HDAC5       | -0,556 | LOC645966 | -0,504 |
| PLGLB1      | -0,556 | SLITRK3   | -0,504 |
| ARL3        | -0,556 | DYNC2H1   | -0,504 |
| FOXP4       | -0,556 | DBNDD1    | -0,504 |
| ZNF18       | -0,556 | LRDD      | -0,504 |
| NPEPL1      | -0,556 | ZNF133    | -0,504 |
| WDR59       | -0,556 | NCR3      | -0,504 |
| JAK1        | -0,556 | TMEM30A   | -0,504 |
| UNC50       | -0,556 | C21ORF55  | -0,504 |
| FCHSD1      | -0,555 | ZNF134    | -0,504 |
| STK35       | -0,555 | HECA      | -0,504 |
| LOC653829   | -0,555 | PACS1     | -0,504 |
| LOC729985   | -0,555 | FAM39DP   | -0,504 |
| PPM1K       | -0,555 | YPEL2     | -0,504 |
| DYRK1A      | -0,555 | DEF8      | -0,504 |
| NCOA6       | -0,555 | SCARB2    | -0,504 |
| EEF1D       | -0,555 | U2AF1L2   | -0,504 |
| GPM6B       | -0,553 | MGC29891  | -0,504 |
| CCDC24      | -0,553 | IL10RA    | -0,504 |
| ZNF493      | -0,553 | C7ORF23   | -0,504 |
| ZNF346      | -0,553 | CD300LB   | -0,500 |
| DPP8        | -0,553 | LOC285307 | -0,500 |
| FLJ45244    | -0,553 | LOC401431 | -0,500 |
| CES2        | -0,553 | FLJ45256  | -0,500 |
| TNFSF10     | -0,553 | TIE1      | -0,500 |
| RBM16       | -0,553 | DMD       | -0,500 |
| KTELC1      | -0,553 | AP4M1     | -0,500 |
| MAGT1       | -0,553 | ZNF225    | -0,500 |
| CPEB2       | -0,552 | TAF1L     | -0,500 |
| C1ORF56     | -0,552 | IFT52     | -0,500 |
| APPBP2      | -0,552 | TNK2      | -0,500 |
| CP110       | -0,552 | SEMA4B    | -0,500 |
| RRAGA       | -0,552 | FLJ40142  | -0,500 |
| TUG1        | -0,552 | ZNF564    | -0,500 |
| ALS2CR8     | -0,550 | FAM65A    | -0,500 |
| MLL3        | -0,550 | SPINT2    | -0,500 |
| CHST12      | -0,550 | ZBTB4     | -0,500 |

|           |        |         |        |
|-----------|--------|---------|--------|
| RFXDC2    | -0,550 | C6ORF32 | -0,500 |
| DVL3      | -0,550 | PITPNM1 | -0,500 |
| ZNF786    | -0,550 | TBC1D9  | -0,500 |
| PSCD1     | -0,550 | LMBRD1  | -0,500 |
| KLF2      | -0,550 |         |        |
| LOC652541 | -0,549 |         |        |
| ZNF248    | -0,549 |         |        |
| DTWD2     | -0,549 |         |        |
| CNOT6     | -0,549 |         |        |
| MANBA     | -0,549 |         |        |
| C3ORF34   | -0,549 |         |        |
| SIX5      | -0,547 |         |        |
| ARL17P1   | -0,547 |         |        |
| PLEKHA1   | -0,547 |         |        |
| CHRNA5    | -0,547 |         |        |
| ZNF434    | -0,547 |         |        |
| PIGC      | -0,547 |         |        |
| AK3       | -0,547 |         |        |
| IFIT5     | -0,547 |         |        |
| LOC649095 | -0,546 |         |        |
| ZNF57     | -0,546 |         |        |
| DTX3      | -0,546 |         |        |
| TACC3     | -0,546 |         |        |
| LOC400304 | -0,546 |         |        |
| ZNF266    | -0,546 |         |        |
| LMF2      | -0,546 |         |        |
| HDAC1     | -0,546 |         |        |
| ZNF658    | -0,544 |         |        |
| LOC644891 | -0,544 |         |        |
| PRKAR2A   | -0,544 |         |        |
| C6ORF64   | -0,544 |         |        |
| CCDC16    | -0,544 |         |        |
| ERCC5     | -0,544 |         |        |
| PPP1R16B  | -0,544 |         |        |
| SEMA3C    | -0,543 |         |        |
| FLJ10120  | -0,543 |         |        |
| LOC650883 | -0,543 |         |        |
| CDO1      | -0,543 |         |        |
| VSIG1     | -0,543 |         |        |
| ZNF607    | -0,543 |         |        |
| GNB5      | -0,543 |         |        |
| LYG1      | -0,543 |         |        |
| LOC92497  | -0,543 |         |        |
| ZNF763    | -0,543 |         |        |

|           |        |
|-----------|--------|
| HERPUD2   | -0,543 |
| SENP6     | -0,543 |
| PLCH2     | -0,543 |
| C14ORF173 | -0,543 |
| STAT5B    | -0,543 |
| TMEM42    | -0,543 |
| DUSP28    | -0,543 |
| LRRFIP1   | -0,543 |
| YWHAZ     | -0,543 |
| FAIM3     | -0,543 |
| OR4K15    | -0,541 |
| LOC644450 | -0,541 |
| PLEC1     | -0,541 |
| LOC285359 | -0,541 |
| SMARCC2   | -0,541 |
| ZC3H3     | -0,541 |
| C19ORF31  | -0,541 |
| LOC728888 | -0,541 |
| ANKRD13A  | -0,541 |
| KIF27     | -0,540 |
| RAP2B     | -0,540 |
| LOC338799 | -0,540 |
| ANKRD36B  | -0,540 |
| SF3A1     | -0,540 |
| C7ORF41   | -0,540 |
| TRA2A     | -0,540 |
| MKRN1     | -0,539 |
| CFL2      | -0,538 |
| LOC440030 | -0,538 |
| IFT122    | -0,538 |
| GTF2IRD2  | -0,538 |
| TSGA10    | -0,538 |
| CDC42EP4  | -0,538 |
| FAM48A    | -0,538 |
| ZBTB39    | -0,538 |
| IL11RA    | -0,538 |
| SIDT1     | -0,538 |
| CLCN6     | -0,538 |
| GAS8      | -0,537 |
| RPLP2     | -0,537 |
| C10ORF46  | -0,537 |
| FLJ20309  | -0,537 |
| DBNDD1    | -0,537 |
| RNF26     | -0,537 |

|           |        |
|-----------|--------|
| WDR37     | -0,537 |
| C2ORF64   | -0,537 |
| CTSS      | -0,537 |
| PIK3IP1   | -0,537 |
| SDHA      | -0,537 |
| ADAR      | -0,537 |
| SPEN      | -0,537 |
| GLTPD2    | -0,535 |
| LTBP1     | -0,535 |
| CBFA2T2   | -0,535 |
| LOC653086 | -0,535 |
| KIAA1147  | -0,535 |
| CDK5RAP3  | -0,535 |
| PEX11B    | -0,535 |
| FGF11     | -0,534 |
| SLC14A1   | -0,534 |
| WHDC1     | -0,534 |
| KIAA0226  | -0,534 |
| SH2B1     | -0,534 |
| POFUT2    | -0,534 |
| CORO1B    | -0,534 |
| DNAJB2    | -0,534 |
| CTSO      | -0,534 |
| LOC654123 | -0,532 |
| MGC12760  | -0,532 |
| CEND1     | -0,532 |
| LRRC56    | -0,532 |
| C3ORF17   | -0,532 |
| MGC52000  | -0,532 |
| LAX1      | -0,532 |
| ARIH2     | -0,532 |
| PGRMC2    | -0,532 |
| ZNF345    | -0,531 |
| ZNF335    | -0,531 |
| TRIM41    | -0,531 |
| RC3H2     | -0,531 |
| FAM113A   | -0,531 |
| FAM73A    | -0,531 |
| ARID4B    | -0,531 |
| SFRS17A   | -0,531 |
| ZDHHC8    | -0,531 |
| GYLTL1B   | -0,529 |
| NPHP4     | -0,529 |
| RCBTB2    | -0,529 |

|           |        |
|-----------|--------|
| ZNF543    | -0,529 |
| RRM2B     | -0,529 |
| ZBTB34    | -0,529 |
| CRY2      | -0,529 |
| ABHD3     | -0,529 |
| LOC647389 | -0,529 |
| ZZEF1     | -0,529 |
| PLXDC2    | -0,528 |
| LOC653468 | -0,528 |
| FSTL3     | -0,528 |
| PKN1      | -0,528 |
| COL4A3    | -0,528 |
| RILPL1    | -0,528 |
| LOC400464 | -0,528 |
| FOXO3     | -0,528 |
| USP47     | -0,528 |
| FKBP14    | -0,528 |
| SMC3      | -0,528 |
| AQR       | -0,528 |
| C7ORF47   | -0,528 |
| KIAA0174  | -0,527 |
| DDX26B    | -0,526 |
| C1QTNF6   | -0,526 |
| RIC3      | -0,526 |
| SCAPER    | -0,526 |
| LOC729776 | -0,526 |
| C14ORF153 | -0,526 |
| RDH14     | -0,526 |
| USP49     | -0,526 |
| FAM104A   | -0,526 |
| TMEM66    | -0,526 |
| COX4I1    | -0,526 |
| LOC648251 | -0,525 |
| TTLL3     | -0,525 |
| UHRF2     | -0,525 |
| BLR1      | -0,525 |
| ZMYM6     | -0,525 |
| ZNF10     | -0,525 |
| PRDM8     | -0,525 |
| FAM65A    | -0,525 |
| GOLGA3    | -0,525 |
| TMEM131   | -0,525 |
| CCDC7     | -0,523 |
| LOC653867 | -0,523 |

|           |        |
|-----------|--------|
| C20ORF106 | -0,523 |
| GARNL3    | -0,523 |
| LOC643011 | -0,523 |
| MTERFD2   | -0,523 |
| LOC158830 | -0,523 |
| HCN3      | -0,523 |
| DNAJC4    | -0,523 |
| LOC389517 | -0,523 |
| TSC1      | -0,523 |
| GRIPAP1   | -0,523 |
| SSTR2     | -0,523 |
| NAPB      | -0,523 |
| RBM4B     | -0,523 |
| BLZF1     | -0,523 |
| IL10RA    | -0,523 |
| COL4A4    | -0,522 |
| TBC1D3B   | -0,522 |
| C10ORF33  | -0,522 |
| LOC644642 | -0,522 |
| EBAG9     | -0,522 |
| FAM116A   | -0,522 |
| ZNF689    | -0,522 |
| TSPYL1    | -0,522 |
| C20ORF111 | -0,522 |
| C5ORF5    | -0,520 |
| SCARA5    | -0,520 |
| TMOD4     | -0,520 |
| LOC123688 | -0,520 |
| GOLGA8A   | -0,520 |
| DENND1C   | -0,520 |
| SF1       | -0,520 |
| ZMYM2     | -0,520 |
| RABL2B    | -0,520 |
| LOC653103 | -0,520 |
| LEMD2     | -0,520 |
| SP110     | -0,520 |
| CCR6      | -0,520 |
| LOC652076 | -0,519 |
| LOC728411 | -0,519 |
| COX11     | -0,519 |
| HPS4      | -0,519 |
| LOC641710 | -0,519 |
| C17ORF65  | -0,519 |
| CNNM4     | -0,519 |



|           |        |
|-----------|--------|
| TRAPPC2   | -0,519 |
| PRPF4B    | -0,519 |
| ZNF250    | -0,519 |
| ZNF480    | -0,519 |
| RANBP10   | -0,519 |
| LOC339344 | -0,519 |
| ZBTB40    | -0,519 |
| FAM89B    | -0,519 |
| TJAP1     | -0,519 |
| KCNA3     | -0,517 |
| NR1D2     | -0,517 |
| DIS3      | -0,517 |
| FANCD2    | -0,517 |
| C6ORF170  | -0,517 |
| PDPR      | -0,517 |
| LBA1      | -0,517 |
| RAXL1     | -0,517 |
| SLU7      | -0,517 |
| FAM3A     | -0,517 |
| FN3KRP    | -0,517 |
| TEAD2     | -0,517 |
| GNB1      | -0,517 |
| ZNF621    | -0,517 |
| E2F5      | -0,516 |
| DOCK9     | -0,516 |
| LOC645550 | -0,516 |
| CDIPT     | -0,516 |
| CLDN14    | -0,516 |
| SMYD2     | -0,516 |
| LOC653066 | -0,516 |
| TM2D2     | -0,516 |
| ZNF767    | -0,516 |
| JMJD1B    | -0,516 |
| C5ORF29   | -0,516 |
| MON2      | -0,516 |
| USP34     | -0,516 |
| RPS27     | -0,516 |
| LOC652663 | -0,514 |
| RBED1     | -0,514 |
| CTPS2     | -0,514 |
| RCP9      | -0,514 |
| RBM38     | -0,514 |
| RGS19     | -0,514 |
| DDX24     | -0,514 |

|           |        |
|-----------|--------|
| LOC646200 | -0,513 |
| FALZ      | -0,513 |
| RALGPS2   | -0,513 |
| SLC25A36  | -0,513 |
| TRAM2     | -0,513 |
| ZNF746    | -0,513 |
| ZC3H12A   | -0,513 |
| LOC644411 | -0,511 |
| PARD6B    | -0,511 |
| GH1       | -0,511 |
| GCC2      | -0,511 |
| 1/mrt     | -0,511 |
| SPG11     | -0,511 |
| KRTAP21-1 | -0,510 |
| VPS13D    | -0,510 |
| NOXA1     | -0,510 |
| PEX1      | -0,510 |
| DGKQ      | -0,510 |
| ARID1A    | -0,510 |
| SF3B1     | -0,510 |
| MPHOSPH8  | -0,510 |
| TTC14     | -0,510 |
| KIAA1737  | -0,510 |
| DAPP1     | -0,510 |
| C14ORF135 | -0,510 |
| TPRG1L    | -0,510 |
| ARHGAP4   | -0,510 |
| ALPP      | -0,510 |
| KRTAP19-4 | -0,508 |
| LOC654000 | -0,508 |
| C11ORF77  | -0,508 |
| ARRB1     | -0,508 |
| RAD17     | -0,508 |
| ZNF160    | -0,508 |
| C10ORF26  | -0,508 |
| ASXL2     | -0,508 |
| FAM120B   | -0,508 |
| CNNM2     | -0,507 |
| C15ORF28  | -0,507 |
| CCDC88B   | -0,507 |
| FGR       | -0,507 |
| LOC730432 | -0,507 |
| FOXD2     | -0,505 |
| C6ORF26   | -0,505 |

|           |        |
|-----------|--------|
| FLJ38717  | -0,505 |
| CSF2RA    | -0,505 |
| TMEM175   | -0,505 |
| STK36     | -0,505 |
| ZC3H7A    | -0,505 |
| XPNPEP3   | -0,505 |
| TXNIP     | -0,505 |
| F2R       | -0,505 |
| FNBP1     | -0,505 |
| HERC3     | -0,504 |
| IRS1      | -0,504 |
| CHI3L2    | -0,504 |
| RHBDL2    | -0,504 |
| HPS3      | -0,504 |
| PNPLA2    | -0,504 |
| ZNF76     | -0,504 |
| JARID1D   | -0,504 |
| CNOT8     | -0,504 |
| HDAC6     | -0,504 |
| EPS15     | -0,504 |
| LOC648852 | -0,504 |
| U2AF1L2   | -0,504 |
| PFAAP5    | -0,504 |
| HLA-DMA   | -0,503 |
| C21ORF74  | -0,502 |
| EMR4      | -0,502 |
| FLJ20489  | -0,502 |
| MYO5C     | -0,502 |
| AFF3      | -0,502 |
| DDX28     | -0,502 |
| UPF3A     | -0,502 |
| ZNF274    | -0,502 |
| CIRBP     | -0,502 |
| RPL36AL   | -0,502 |
| TMEM59    | -0,501 |
| FLJ11235  | -0,501 |
| LOC648189 | -0,501 |
| FLJ38969  | -0,501 |
| C1ORF107  | -0,501 |
| MBTD1     | -0,501 |
| CLSTN1    | -0,501 |
| ZBP1      | -0,501 |
| DOPEY2    | -0,501 |
| MOAP1     | -0,501 |

|         |        |
|---------|--------|
| HBP1    | -0,501 |
| TMEM134 | -0,501 |
| NME3    | -0,501 |
| SHROOM4 | -0,501 |
| GJC1    | -0,501 |
