# Supplementary material for: CLL Cells Respond to B-Cell Receptor Stimulation with a MicroRNA/mRNA Signature Associated with MYC Activation and Cell Cycle Progression
Source: PubMed Central journal article supplement (PMC3613353; doi:10.1371/journal.pone.0060275), 2013-04-01
Supplement: pone.0060275.s016.pdf [file pone.0060275.s016.pdf]

Table S9: Gene sets enriched for genes negatively correlating with hsa-miR-132/212 expression

| Reference                                                      | Subject                                                                                                                                              | miR-132 | miR-212 |
|----------------------------------------------------------------|------------------------------------------------------------------------------------------------------------------------------------------------------|---------|---------|
| Mori et al., Cancer Res. 2008, Table S4                        | Down-regulated genes in the B lymphocyte developmental signature, expression profiling of lymphomas from Emu-myc transgenic mice: the Pre-B1 stage.  | 0.0000  | 0.0000  |
| Moserle et al., Cancer Res. 2008, Table S2                     | Top 50 genes up-regulated in ovarian cancer progenitor cells (also known as side population, SP, cells) in response to interferon alpha (IFNA).      | 0.0000  | 0.0000  |
| O'Donnell et al., Mol Cell Biol. 2006, Table S7B               | Genes up-regulated in P493-6 cells (B lymphocyte) by MYC and down-regulated by RNAi knockdown of TFRC .                                              | 0.0000  | 0.0012  |
| Sotiriou et al., J Natl Cancer Inst. 2006, Table S1            | Down-regulated genes whose expression correlated with histologic grade of invasive breast cancer tumors: comparison of grade 1 vs grade 3.           | 0.0000  | 0.0354  |
| Yu et al., Ann N Y Acad Sci. 2005, Table 2                     | Genes down-regulated in B cell lymphoma tumors expressing an activated form of MYC.                                                                  | 0.0000  | 0.0019  |
| Dazard et al., Oncogene 2003, Table S2                         | Genes down-regulated in NHEK cells (normal keratinocytes) by UV-B irradiation.                                                                       | 0.0010  | 0.0156  |
| Klein et al., Blood 2003, Table S2                             | Genes down-regulated in AIDS-related primary effusion lymphoma (PEL) samples compared to other tumor subtypes and normal B lymphocytes.              | 0.0016  | 0.0014  |
| Lee et al., Int Immunol. 2004, Table S1                        | Genes enriched at every T lymphocyte differentiation stage compared to the early passage fetal thymic stromal cultures (TSC).                        | 0.0045  | 0.0189  |
| Osman et al., Clin Cancer Res. 2006, Table S1                  | Genes down-regulated in blood samples from bladder cancer patients.                                                                                  | 0.0045  | 0.0232  |
| Winter et al., Cancer Res. 2007, Table S3                      | Genes down-regulated in head and neck tumor samples which clustered around known hypoxia genes.                                                      | 0.0049  | 0.0056  |
| Browne et al., J. Virol. 2001, Table S1                        | Genes down-regulated in primary fibroblast cell culture with at 6 h time point that were not down-regulated at the previous time point, 4 h.         | 0.0050  | 0.0184  |
| Haddad et al., Blood 2004, Table S3                            | Genes up-regulated in hematopoietic progenitor cells (HPC) of B lymphocyte lineage CD34+CD45RA+CD10+.                                                | 0.0051  | 0.0024  |
| Zhan et al., Blood 2006, Table S3                              | Top 50 down-regulated genes in cluster PR of multiple myeloma samples characterized by increased expression of proliferation and cell cycle genes.   | 0.0071  | 0.0147  |
| Theilgaard et al., J Immunol. 2004, Table 3                    | Genes down-regulated in polymorphonuclear neutrophilic granulocytes (PMNs) attracted to skin wounds.                                                 | 0.0072  | 0.0335  |
| Tarte et al., Blood 2003, Table S4                             | Genes down-regulated in plasma cells compared with B lymphocytes.                                                                                    | 0.0088  | 0.0232  |
| Ginestier et al., Clin Cancer Res. 2006, Table S4              | Genes up-regulated in non-metastatic breast cancer tumors having type 1 amplification in the 20q13 region; involves ZNF217 locus only.               | 0.0093  | 0.0031  |
| Mori et al., Cancer Res. 2008, Table S4                        | Up-regulated genes in the B lymphocyte developmental signature, expression profiling of lymphomas from the Emu-myc transgenic mice: the mature B     | 0.0094  | 0.0359  |
| Kim et al., Oncogene 2006, Table S3                            | Genes negatively correlated with amplifications of MYCN in the SCLC (small cell lung cancer) cell lines.                                             | 0.0095  | 0.0000  |
| Rutella et al., Blood 2006, Table S1                           | Genes down-regulated in peripheral blood monocytes by HGF .                                                                                          | 0.0223  | 0.0174  |
| Zhan et al., Blood 2006, Table S3                              | Top 50 down-regulated genes in cluster LB of multiple myeloma samples belonging to the low bone disease group.                                       | 0.0244  | 0.0234  |
| Zhou et al., J. Immunol. 2007, Table S2                        | Genes down-regulated in macrophages by P.gingivalis FimA pathogen.                                                                                   | 0.0244  | 0.0170  |
| Mori et al., Cancer Res. 2008, Table S4                        | Up-regulated genes in the B lymphocyte developmental signature expression profiling of lymphomas from Emu-myc transgenic mice: the immature B stage. | 0.0245  | 0.0350  |
| Pasqualucci et al., Nat Genet 2008, Table S2                   | Genes down-regulated in post-GC, BCL6 dependent B cell non-Hodgkin's lymphoma (B-NHL) vs MYC driven pre-GC lymphoma; GC = germinal center.           | 0.0281  | 0.0164  |
| Gargalovic et al., Proc Natl Acad Sci USA 2006, Table S1       | Genes which are down-regulated in primary aortic endothelium after exposure to the oxidized 1-palmitoyl-2-arachidonyl-sn-3-glycerophosphorylcholine  | 0.0365  | 0.0016  |
| Krasnoselskaya et al., AIDS Res Hum Retroviruses 2002, Table 2 | Up-regulated in GHOST CXCR4 cells (osteosarcoma) upon ectopic expression of ILF3.                                                                    | 0.0367  | 0.0498  |

Reference of publication, gene set description are listed, p values, for the miRNA indicated. Data generated through [www.mirnabodymap.org](http://www.mirnabodymap.org)
